# Supplementary material for: The tomato genome sequence provides insights into fleshy fruit evolution
Source: Springer Nature journal article supplement (doi:10.1038/nature11119), 2012-05-01
Supplement: 41586_2012_BFnature11119_MOESM68_ESM.zip [file 41586_2012_BFnature11119_MOESM68_ESM.zip]

Archive with 1 entries (1 files):
- Supplementary Tables.xlsx
