# Supplementary material for: The tomato genome sequence provides insights into fleshy fruit evolution
Source: Springer Nature journal article supplement (doi:10.1038/nature11119), 2012-05-01
Supplement: 41586_2012_BFnature11119_MOESM68_ESM.zip [file 41586_2012_BFnature11119_MOESM68_ESM.zip › Supplementary Tables.xlsx]

## Sheet: Supplementary Table 1
Supplementary Table 1. Normalized expression (RPKM) of tomato genes based on RNA-seq data.
gene ID	human readable description	normalized expression (RPKM)																												ORTHO_ID	Number of OrthoMCL members
		Heinz_bud_rep1	Heinz_bud_rep2	Heinz_flower_rep1	Heinz_flower_rep2	Heinz_leaf_rep1	Heinz_leaf_rep2	Heinz_root_rep1	Heinz_root_rep2	Heinz_1cm_fruit_rep1	Heinz_1cm_fruit_rep2	Heinz_2cm_fruit_rep1	Heinz_2cm_fruit_rep2	Heinz_3cm_fruit_rep1	Heinz_3cm_fruit_rep2	Heinz_MG_fruit_rep1	Heinz_MG_fruit_rep2	Heinz_B_fruit_rep1	Heinz_B_fruit_rep2	Heinz_B+10_fruit_rep1	Heinz_B+10_fruit_rep2	Pimp_IG_fruit_rep1	Pimp_IG_fruit_rep2	Pimp_B_fruit_rep1	Pimp_B_fruit_rep2	Pimp_B+5_fruit_rep1	Pimp_B+5_fruit_rep2	Pimp_leaf_rep1	Pimp_leaf_rep2		tomato	potato	arabidopsis	grape	rice
Solyc00g005000	Aspartic proteinase nepenthesin I (AHRD V1 **-- A9ZMF9_NEPAL); contains Interpro domain(s) IPR001461 Peptidase A1	0	0.05	0.12	0.12	0.51	0.58	139.61	134.95	0	0	0	0	0.12	0.06	0.16	0.19	0	0	0	0	0.08	0.08	0	0	0	0	0	0	ORTHOMCL3362	2	2	1	1	1
Solyc00g005020	Unknown Protein (AHRD V1)	0	0	0	0	0	0	0	0	0	0	0	0	0	0	0	0	0	0.2	0.31	0.16	0	0	0	0	0	0	0	0	ORTHOMCL89	41	2	0	0	1
Solyc00g005040	Potassium channel (AHRD V1 ***- D0EM91_9ROSI); contains Interpro domain(s) IPR000595 Cyclic nucleotide-binding	3.27	2.45	3.8	3.13	5.92	7.54	1.31	1.31	6.04	7.95	4.79	2.57	3.75	3.77	6.71	3.05	4.96	5.63	5.62	2.82	0	0	0	0	0	0	3.34	0	NA
Solyc00g005050	Arabinogalactan protein (AHRD V1 ***- B6SST2_MAIZE)	52.19	57.74	40.69	41.77	39.76	38.19	53.05	52.98	45.85	47.46	47.19	37.26	43.43	45.4	49.49	52.33	44.19	46.74	49.34	49.51	80.8	82.34	101.07	99.4	182.89	174.99	43.24	40.65	ORTHOMCL7326	1	1	1	1	1
Solyc00g005060	Unknown Protein (AHRD V1)	0	0	0	0	0	0	0	0	0	0	0	0	0	0	0	0	0	0	0	0	0	0	0	0	0	0	0	0	NA
Solyc00g005070	Unknown Protein (AHRD V1)	0	0	0	0	0	0	0	0	0	0	0	0	0	0	0	0	0	0	0	0	0	0	0	0	0	0	0	0	NA
Solyc00g005080	Ycf2 (AHRD V1 ***- A6YA23_9MAGN)	0	0	0	0	0.33	0	0.69	0.69	0	0	0	0.85	0.33	0.66	0	0.37	0	0	0	0.27	0.89	0.46	0	0.32	0	0.37	0	0	NA
Solyc00g005090	Unknown Protein (AHRD V1)	0	0	0	0	0	0	0	0	0	0	0	0	0	0	0	0	0	0	0	0	0	0	0	0	0	0	0	0	NA
Solyc00g005100	Unknown Protein (AHRD V1)	0	0	0	0	0	0	0	0	0	0	0	0	0	0	0	0	0	0	0	0	0	0	0	0	0	0	0	0	ORTHOMCL13977	3	0	0	0	0
Solyc00g005110	Unknown Protein (AHRD V1)	0	0	0	0	0	0	0	0	0	0	0	0	0	0	0	0	0	0	0	0	0	0	0	0	0	0	0	0	ORTHOMCL271	21	2	0	0	0
Solyc00g005120	Unknown Protein (AHRD V1)	0	0	0.53	0	0	0	0	0	0	0	0	0	0	0	0	0	0	0	0	0	0	0	0	0	0.53	0.6	0	0	NA
Solyc00g005130	Ulp1 protease family C-terminal catalytic domain containing protein (AHRD V1 ***- Q60D46_SOLDE)	0	0.24	0	0	0	0	0	0	0	0	0	0	0.27	0	0	0	0.25	0.26	0	0	0	0.37	0	0	0	0	0	0	ORTHOMCL62	50	0	0	0	0
Solyc00g005140	Unknown Protein (AHRD V1)	0	0	0.19	0	0	0	0	0	0	0	0	0	0	0	0	0	0	0	0	0	0	0.27	0	0	0	0	0	0	ORTHOMCL763	13	0	0	0	0
Solyc00g005150	HAT dimerisation domain-containing protein-like (AHRD V1 ***- Q5VNQ7_ORYSJ); contains Interpro domain(s) IPR007021 Protein of unknown function DUF659	0.45	0.23	0.35	0	0.51	0.26	0.45	0	0.31	0	0.25	0	0.17	0	0.46	0.47	0.16	0.25	0.2	0.14	0.81	0.6	0.39	0.25	0.77	0.29	0	0	ORTHOMCL93	14	1	1	27	0
Solyc00g005160	Retrovirus-related Pol polyprotein from transposon TNT 1-94 (AHRD V1 -*-- POLX_TOBAC)	0	0	0	0	0	0	0	0	0	0	0	0	0	0	0	0	0	0	0	0	0	0	0	0	0	0	0	0	NA
Solyc00g005170	Unknown Protein (AHRD V1)	0	0	0	0	0	0	0	0	0	0	0	0	0	0	0	0	0	0	0	0	0	0	0	0	0	0	0	0	NA
Solyc00g005180	Unknown Protein (AHRD V1)	0	0	0	0	0	0	0	0	0	0	0	0	0	0	0	0	0	0	0	0	0	0	0	0	0	0	0	0	NA
Solyc00g005280	Unknown Protein (AHRD V1)	0	0	0	0	0	0	0	0	0	0	0	0	0	0	0	0	0	0	0	0	0	0	0	0	0	0	0	0	ORTHOMCL226	26	0	0	0	0
Solyc00g005420	Unknown Protein (AHRD V1)	0	0	0	0	0	0	0	0	0	0	0	0	0	0	0	0	0	0	0	0	0	0	0	0	0	0	0	0	NA
Solyc00g005430	Unknown Protein (AHRD V1)	0	0	0	0	0	0	0	0	0	0	0	0	0	0	0	0	0	0	0	0	0	0	0	0	0	0	0	0	NA
Solyc00g005440	40S ribosomal protein S9 (AHRD V1 ***- Q6H8J2_CATRO); contains Interpro domain(s) IPR001912 Ribosomal protein S4	12.72	12.16	12.26	12.22	5.31	6.38	12.66	12.24	35.49	33.15	13.6	8.64	20.54	18.16	16.76	16.38	11.26	12.6	7.74	7.73	1.82	4.27	3.23	1.12	2.31	2.83	2.33	5.09	NA
Solyc00g005450	Unknown Protein (AHRD V1)	0	0	0	0	0	0	0	0	0	0	0	0	0	0	0	0	0	0	0	0	0	0	0	0	0	0	0	0	NA
Solyc00g005460	Unknown Protein (AHRD V1); contains Interpro domain(s) IPR001912 Ribosomal protein S4	0	0	0	0	0.62	0	0	0	0	0	0	0	0	0	0	0	0	0	0	0	0	0	0	0	0	0	0	0	NA
Solyc00g005470	40S ribosomal protein S9 (AHRD V1 *-*- Q6H8J2_CATRO); contains Interpro domain(s) IPR001912 Ribosomal protein S4	0	0	0	0	0	0	0	0	0	0	0	0	0	0	0	0	0	0	0	0	0	0	0	0	0	0	0	0	NA
Solyc00g005480	Ubiquitin carrier protein (AHRD V1 *-*- A5B6X4_VITVI); contains Interpro domain(s) IPR000608 Ubiquitin-conjugating enzyme, E2	0	0.24	0	0.28	0	0	0	0	0	0	0	0	0	0	0	0	0	0	0	0	0	0	0	0	0	0	0	0	NA
Solyc00g005490	Unknown Protein (AHRD V1)	0	0	0	0	0	0	0	0	0	0	0	0	0	0	0	0	0	0	0	0	0	0	0	0	0	0	0	0	ORTHOMCL601	15	0	0	0	0
Solyc00g005840	Thioredoxin family protein (AHRD V1 ***- D7MCJ1_ARALY); contains Interpro domain(s) IPR015467 Thioredoxin, core	32.22	31.06	49.21	48.5	92.2	89.78	4.38	3.52	15.28	14.79	17.46	16.68	8.95	7.11	17.98	16.11	8.86	11.59	3.57	2.25	15.8	15.55	8.79	8.26	7.5	7.56	94.48	63.72	ORTHOMCL7764	1	1	1	1	1
Solyc00g005850	Unknown Protein (AHRD V1)	0	0	0	0	0	0	0	0	0	0	0	0	0	0	0	0	0	0	0	0.15	0	0	0	0	0	0	0	0	NA
Solyc00g005860	Unknown Protein (AHRD V1)	0	0	0	0	0	0	0	0.33	0	0	0.46	0	0	0	0	0	0	0.31	0.49	0	0	0	0	0	1.26	0.36	0	0	ORTHOMCL13976	3	0	0	0	0
Solyc00g005870	Mutator-like transposase (AHRD V1 *-*- Q94HK4_ORYSA); contains Interpro domain(s) IPR006564 Zinc finger, PMZ-type	0	0	0	0	0	0	0.1	0	0	0	0	0	0	0.19	0	0	0	0	0	0	0	0	0	0.09	0.09	0	0	0	ORTHOMCL21069	1	1	0	0	0
Solyc00g005880	Unknown Protein (AHRD V1)	0	0	0	0	0	0	0	0	0	0	0	0	0	0	0	0	0	0	0	0	0	0	0	0	0	0	0	0	ORTHOMCL2089	8	0	0	0	0
Solyc00g005890	Unknown Protein (AHRD V1)	0.98	1	0	0	1.11	0	0	0	0	0	1.66	0	0	0	0	0	0	0	0	0	0	0	0	0	0	0	0	0	NA
Solyc00g005900	Oxygen-evolving enhancer protein 1, chloroplastic (AHRD V1 ***- PSBO_SOLTU); contains Interpro domain(s) IPR002628 Photosystem II manganese-stabilizing protein PsbO	0	0	0	0	0	0.33	0	0	0	0	0	0	0	0	0	0.37	0	0	0	0	0	0	0	0	0	0	0	0	NA
Solyc00g005980	Zinc finger CCHC-type (AHRD V1 *--- Q1SKZ9_MEDTR)	0	0	0	0	0	0	0	0	0	0	0	0	0	0	0	0	0	0	0	0	0	0	0	0	0	0	0	0	ORTHOMCL4114	4	2	0	0	0
Solyc00g006010	Unknown Protein (AHRD V1)	0	0	0	0	0	0	0	0	0	0	0	0	0	0	0	0	0	0	0	0	0	0	0	0	0	0	0	0	NA
Solyc00g006020	Endonuclease/exonuclease/phosphatase (AHRD V1 ***- A2Q500_MEDTR)	0	0	0	0	0	0	0	0	0	0	0	0	0	0	0	0	0	0	0	0	0	0	0	0	0	0	0	0	ORTHOMCL678	14	0	0	0	0
Solyc00g006050	Unknown Protein (AHRD V1); contains Interpro domain(s) IPR001457 NADH:ubiquinone/plastoquinone oxidoreductase, chain 6	0	0	0	0.19	0	0	0	0	0	0	0	0	0	0	0	0	0	0	0	0	0	0	0	0	0	0	0	0	NA
Solyc00g006090	Endonuclease/exonuclease/phosphatase (AHRD V1 *--- A2Q500_MEDTR)	0	0	0	0	0	0	0	0	0	0	0	0	0	0	0	0	0	0	0	0	0	0	0	0	0	0	0	0	ORTHOMCL21068	2	0	0	0	0
Solyc00g006170	Zinc finger CCHC-type (AHRD V1 **-- Q1SKZ9_MEDTR)	0	0	0	0	0	0	0	0	0	0	0	0	0	0	0	0	0	0	0	0	0	0	0	0	0	0	0	0	ORTHOMCL4114	4	2	0	0	0
Solyc00g006250	Unknown Protein (AHRD V1)	0	0	0	0	0	0	0	0	0	0	0	0	0	0	0	0	0	0	0	0	0	0	0	0	0	0	0	0	NA
Solyc00g006470	Unknown Protein (AHRD V1)	0	0	0	0	0	0	0	0	0	0	0.26	0.45	0	0	0	0	0	0	0	0	0	0	0	0	0	0	24.19	13.89	ORTHOMCL6213	5	0	0	0	0
Solyc00g006480	Glucosyltransferase-12 (AHRD V1 *-*- Q8S997_PHAAN); contains Interpro domain(s) IPR002213 UDP-glucuronosyl/UDP-glucosyltransferase	0	0	0	0	0	0	0	0	0	0	0	0	0	0	0	0	0	0	0	0	0	0	0	0	0	0	0	0	NA
Solyc00g006490	Serine/threonine-protein phosphatase 6 regulatory subunit 3 (AHRD V1 **-- SAPS3_HUMAN); contains Interpro domain(s) IPR007587 SIT4 phosphatase-associated protein	10.35	9.2	13.21	10.87	11	10.31	20.71	18.81	7.15	6.38	10.03	8.87	10.81	10.95	14.43	15.61	15.66	14.6	14.66	16.83	14.98	15.34	15.23	16.54	18.03	16.08	7.67	10.95	ORTHOMCL667	4	3	4	2	2
Solyc00g006500	Unknown Protein (AHRD V1)	0	0	0	0	0	0	0	0	0	0	0	0	0	0	0	0	0	0	0	0	0	0	0	0	0	0	0	0	NA
Solyc00g006510	Unknown Protein (AHRD V1)	0	0	0	0	0	0	0	0	0	0	0	0	0	0	0	0	0	0	0	0	0	0	0	0	0	0	0	0	NA
Solyc00g006520	Unknown Protein (AHRD V1)	0	0	0	0	0	0	0	0	0	0	0	0	0	0	0	0	0	0	0	0	0	0	0	0	0	0	0	0	NA
Solyc00g006530	Unknown Protein (AHRD V1)	0	0	0	0	0	0	0	0	0	0	0	0	0	0	0	0	0	0	0	0	0	0	0	0	0	0	0	0	NA
Solyc00g006540	Unknown Protein (AHRD V1)	0	0	0	0	0	0	0	0	0	0	0	0	0	0	0	0	0	0	0	0	0	0	0	0	0	0	0	0	NA
Solyc00g006550	UDP-glucosyltransferase family 1 protein (AHRD V1 ***- C6KI45_CITSI); contains Interpro domain(s) IPR002213 UDP-glucuronosyl/UDP-glucosyltransferase	0	0	0	0	0	0	0	0	0	0	0	0	0	0	0	0	0	0	0	0	0	0	0	0	0	0	0	0	NA
Solyc00g006560	Glucosyltransferase-12 (AHRD V1 **** Q8S997_PHAAN); contains Interpro domain(s) IPR002213 UDP-glucuronosyl/UDP-glucosyltransferase	0	0	0	0	0	0	0	0	0	0	0	0	0	0	0	0	0	0	0	0	0	0	0	0	0	0	0	0	NA
Solyc00g006570	Unknown Protein (AHRD V1)	0	0	0	0	0	0	0	0	0	0	0	0	0	0	0	0	0	0	0	0	0	0	0	0	0	0	0	0	ORTHOMCL394	19	0	0	0	0
Solyc00g006590	Unknown Protein (AHRD V1)	0	0.12	0	0	0	0	0	0	0	0	0	0	0	0	0	0	0	0	0.1	0.32	0	0	0	0	0.13	0	0	0	ORTHOMCL2856	7	0	0	0	0
Solyc00g006600	HAT family dimerisation domain containing protein (AHRD V1 ***- Q2QPA8_ORYSJ); contains Interpro domain(s) IPR007021 Protein of unknown function DUF659	0.3	0.15	0	0.18	0.17	0.09	0.36	0.27	0	0.21	0	0	0.09	0	0.35	0.38	0	0.17	0.33	0.35	0.47	0.12	0.26	0.34	0.35	0.1	0	0	ORTHOMCL93	14	1	1	27	0
Solyc00g006630	Unknown Protein (AHRD V1)	0	0	0	0	0	0	0	0	0	0	0	0	0	0	0	0	0	0	0	0	0	0	0	0	0	0	0	0	NA
Solyc00g006650	Unknown Protein (AHRD V1)	0	0	0	0	0	0	0	0	0	0	0	0	0	0	0	0	0	0	0	0	0	0	0	0	0	0	0	0	ORTHOMCL51	53	0	0	0	0
Solyc00g006660	Unknown Protein (AHRD V1)	0	0	0	0	0	0	0	0	0	0	0	0	0	0	0	0	0	0	0	0	0	0	0	0	0	0	0	0	NA
Solyc00g006670	Unknown Protein (AHRD V1)	0	0	0	0	0	0	0	0	0	0	0	0	0	0	0	0	0	0	0	0	0	0	0	0	0	0	12.58	5.23	ORTHOMCL21067	2	0	0	0	0
Solyc00g006680	Plant senescence-associated protein (Fragment) (AHRD V1 *-*- D7PDP5_9HYPO)	0	0	0	0	0	0	0	0	0	0	0	0	0	0	0	0	0	0	0	0	0	0	0	0	0	0	0	0	NA
Solyc00g006690	Unknown Protein (AHRD V1)	0	0	0	0	0	0	0	0	0	0	0	0	0	0	0	0	0	0	0	0	0	0	0	0	0	0	0	0	ORTHOMCL2855	7	0	0	0	0
Solyc00g006700	Unknown Protein (AHRD V1)	0	0	0	0	0	0	0	0	0	0	0	0	0	0	0	0	0	0	0	0	0	0	0	0	0	0	0	0	NA
Solyc00g006800	Transaldolase (AHRD V1 ***- Q9FVH1_SOLLC); contains Interpro domain(s) IPR014634 Transaldolase, bacterial/plant type	73.55	67.71	118.09	120.91	17.32	16.64	312.69	305.16	123.82	124.16	175.06	156.68	139.19	134.38	131.96	139.39	109.64	110.58	148.59	143.22	117.11	118.72	141.21	138.08	89.88	88.76	16.54	15.63	ORTHOMCL7297	1	1	1	1	1
Solyc00g006810	Peptidyl-prolyl cis-trans isomerase (AHRD V1 *-*- Q8DJW8_THEEB); contains Interpro domain(s) IPR001179 Peptidyl-prolyl cis-trans isomerase, FKBP-type	18.55	22.16	18.42	17.91	38.63	39.07	6.5	5.06	21.41	21.81	18.33	17.26	17.17	13.33	23.06	17.01	32.57	31.77	33.49	34.88	27.58	33.05	46.62	38.97	59.23	56.63	83.51	81.47	ORTHOMCL7298	1	1	1	1	1
Solyc00g006820	Peptide transporter-like protein (AHRD V1 **-* Q9LYR6_ARATH); contains Interpro domain(s) IPR000109 TGF-beta receptor, type I/II extracellular region	10.37	10.26	7.34	6.02	18.86	18.09	1.53	1.04	2.81	2.96	5.02	4.54	10	9.84	3.24	4.11	1.1	0.84	0.3	0.31	4.32	2.94	1.45	2.02	0	0.1	26.67	26.35	ORTHOMCL7299	1	1	1	1	1
Solyc00g006830	No exine formation-1 (AHRD V1 **-- Q9LYR7_ARATH)	4.19	4.88	4.89	4.67	3.61	4.8	21.52	22.52	7.44	6.73	18.03	14.19	15.36	15.86	19.02	18.36	17.23	17.17	18.34	16.91	22.58	24.2	17.77	19.22	13.2	13.09	6.91	5.16	ORTHOMCL7300	1	1	1	1	1
Solyc00g006840	Unknown Protein (AHRD V1)	0	0	0	0	0	0	0	0	0	0	0	0	0	0	0	0	0	0	0	0	0	0	0	0	0	0	0	0	ORTHOMCL21066	1	1	0	0	0
Solyc00g006850	Unknown Protein (AHRD V1)	0	0	0	0	0	0	0	0	0	0	0	0	0	0	0	0	0	0	0	0	0	0	0	0	0	0	0	0	NA
Solyc00g006860	Unknown Protein (AHRD V1)	0	0	0	0	0	0	0	0	0	0	0	0	0	0	0	0	0	0	0	0	0	0	0	0	0	0	0	0	NA
Solyc00g006870	Unknown Protein (AHRD V1)	0	0	0	0	0	0	0	0	0	0	0	0	0	0	0	0	0	0	0	0	0	0	0	0	0	0	0	0	NA
Solyc00g006880	Unknown Protein (AHRD V1)	0	0	0	0	0	0	0	0	0	0	0	0	0	0	0	0	0	0	0	0	0	0	0	0	0	0	0	0	NA
Solyc00g006890	Unknown Protein (AHRD V1)	0	0	0	0	0	0	0	0	0	0	0	0	0	0	0	0	0	0	0	0	0	0	0	0	0	0	0	0	NA
Solyc00g006900	Unknown Protein (AHRD V1)	0.88	0.36	0.2	1.26	1.99	1.42	1.48	1.26	1.7	0.99	2.97	2.33	3.22	1.62	1.08	1.56	2.29	3.75	4.22	2.11	5.18	6.17	4.31	4.13	3.64	2.97	5.39	2.8	NA
Solyc00g007000	Unknown Protein (AHRD V1)	0	0	0	0.68	0	0	0	0.68	0	0	0	0	0	0	0	0	0	0	0	0	0	0.91	0	0	0	0	0	0	NA
Solyc00g007010	Phosphatidylinositol phosphate (PtdInsP) phosphatase involved in hydrolysis of PtdIns (AHRD V1 **** D6VWZ1_YEAST); contains Interpro domain(s) IPR002013 Synaptojanin, N-terminal	26.03	24.68	10.2	8.53	6.94	7.28	15.69	15.93	8.43	9.08	11.19	9.63	5.14	5.52	6.15	7.17	8.71	8.06	13.88	13.98	6.96	7.15	9.62	10.29	9.5	8.51	5.36	5.03	ORTHOMCL1764	2	2	2	1	2
Solyc00g007020	Tetratricopeptide repeat protein 5 (AHRD V1 ***- TTC5_BOVIN)	0	0	0	0	0	0	0	0	0	0	0	0	0	0	0	0	0	0	0	0	0	0	0	0	0	0	0	0	NA
Solyc00g007030	Glutathione S-transferase (AHRD V1 ***- Q76KW1_PEA); contains Interpro domain(s) IPR004046 Glutathione S-transferase, C-terminal	0	0	0	0	0	0	0.14	0	0	0.33	0.4	0	0.14	0	0	0	0	0	0	0	0.37	0	0	0.27	0	0	0	0	ORTHOMCL11261	3	1	0	0	0
Solyc00g007040	Glutathione-S-transferase (AHRD V1 ***- B5M1W3_RHEAU); contains Interpro domain(s) IPR004045 Glutathione S-transferase, N-terminal	0	0	0	0	0	0	0	0	0.17	0	0	0	0.28	0	0	0	0	0	0	0	0	0	0	0	0	0	0	0	NA
Solyc00g007050	Unknown Protein (AHRD V1)	0	0	0	0	0	0	0	0	0	0	0	0	0	0	0	0	0	0	0	0	0	0	0	0	0	0	0	0	NA
Solyc00g007060	Serine/threonine kinase-like protein ABC1063 (AHRD V1 **** Q1KMP8_HORVD); contains Interpro domain(s) IPR002290 Serine/threonine protein kinase	9.06	8.65	7.4	6.45	10.84	11.15	22.35	21.43	12.94	9.2	9.12	7.6	7.19	6.54	8.16	8.62	5.49	6.73	5.08	6.48	6.13	6.82	6.27	6.5	3.96	5.08	8.94	11.17	ORTHOMCL818	3	3	2	1	4
Solyc00g007070	Heterogeneous nuclear ribonucleoprotein H1 (AHRD V1 **-- Q8C2Q7_MOUSE); contains Interpro domain(s) IPR012677 Nucleotide-binding, alpha-beta plait	68.61	62.18	65.49	69.14	48.17	45.17	61.98	57.43	67.81	65.25	57.21	53.28	65.95	66.35	50.81	51.98	54.6	54.01	59	59.82	50.11	56.28	61.03	57.1	74.63	71.08	48.36	48.55	ORTHOMCL4241	1	1	1	1	2
Solyc00g007080	Unknown Protein (AHRD V1); contains Interpro domain(s) IPR007514 CHD5-like protein	25.82	24.4	2.89	1.99	2	1.2	1.12	1.49	9.49	9.03	3.86	2.75	1.67	1.68	1.92	1.45	0.11	0	0.18	0.19	1.13	0.33	0.55	0.46	1.43	0.14	3.18	2.56	ORTHOMCL3202	2	2	1	1	1
Solyc00g007090	Multi-pass transmembrane protein (AHRD V1 *--- Q5CMR0_CRYHO); contains Interpro domain(s) IPR019328 GPI-GlcNAc transferase complex, PIG-H component	20.29	19.08	10.84	10.05	11.38	14.43	11.19	10.56	17.04	17.28	11.28	8.01	12.11	11	8.52	7.43	7.12	6.33	9.2	6.53	5.89	7.2	8.44	7.23	5.31	6.54	12.15	11.43	ORTHOMCL7592	1	1	1	1	1
Solyc00g007100	Serine/threonine protein kinase (AHRD V1 **** Q2U105_ASPOR); contains Interpro domain(s) IPR002290 Serine/threonine protein kinase	34.14	34.53	32.43	32.57	8.07	7.49	38.09	37.52	9.46	7.77	11.32	10.57	8.27	9.55	16	15.35	10.28	9.84	9.49	9.73	10.91	10.67	7	7.92	5.32	6.01	2.35	3.41	ORTHOMCL2577	2	2	2	1	1
Solyc00g007110	Epidermal growth factor receptor substrate 15 (AHRD V1 *--- EPS15_HUMAN); contains Interpro domain(s) IPR011992 EF-Hand type	2.39	2.06	1.85	1.59	1.56	1.84	7.52	7.44	3.09	2.98	5.03	4.93	3.9	3.25	5.72	4.39	1.84	1.67	2.6	3.29	2.8	2.88	2.42	2.62	1.04	1.24	1.55	2.69	ORTHOMCL21065	1	1	0	0	0
Solyc00g007120	Calcium-binding EF hand family protein (AHRD V1 ***- D7KK32_ARALY); contains Interpro domain(s) IPR011992 EF-Hand type	3	2.68	1.87	2.82	2.12	2.68	7.01	8.71	4.78	4.21	6.47	6.85	4.3	4.24	6.58	6.52	2.76	2.69	3.3	3.77	3.32	3.11	3.02	2.31	1.64	0.83	2.82	3.37	ORTHOMCL1016	3	3	2	2	2
Solyc00g007130	Amino acid transporter family protein (AHRD V1 **** D7LI10_ARALY); contains Interpro domain(s) IPR013057 Amino acid transporter, transmembrane	0.97	0.81	1.32	0.75	0.64	1.31	0.34	0.14	0.39	0.32	0.58	0.84	0.39	0.46	0.35	0.51	0.43	0.45	0.61	0.84	2.21	1	1.9	1.59	2.16	0.67	1.19	0.66	ORTHOMCL1142	3	3	2	1	2
Solyc00g007140	Unknown Protein (AHRD V1)	0	0	0	0	0	0	0	0.32	0	0	0	0	0	0	0	0	0	0	0	0.24	0	0	0	0	0	0	0	0	ORTHOMCL21064	2	0	0	0	0
Solyc00g007150	Unknown Protein (AHRD V1)	3.14	2.14	3.85	3.34	1.38	1.61	10.66	8.14	2.17	1.96	5.01	4.62	2.4	3.62	4.03	4.65	4.16	2.74	3.25	3.86	0	0	0	0	0	0	0	0	NA
Solyc00g007160	Transposase (AHRD V1 **-- Q0ZCF0_POPTR)	0	0.17	0	0.2	0	0	0	0	0	0	0	0.25	0	0	0	0	0	0	0.15	0	0	0	0	0	0	0	0	0	NA
Solyc00g007170	Unknown Protein (AHRD V1)	0	0	0	0.73	0	0	0	0.37	0	0	0	0	0	0	0	0	0.33	0	0	0	0	0	0	0	0	0	0	0	NA
Solyc00g007180	Gibberellin 3-beta-hydroxylase (Fragment) (AHRD V1 ***- D9ZZX1_TRIIC); contains Interpro domain(s) IPR005123 Oxoglutarate and iron-dependent oxygenase	0	0	0	0	0	0	0	0	0	0	0	0	0	0	0	0	0	0	0	0	0	0	0	0	0	0	0	0	ORTHOMCL4163	2	3	0	1	0
Solyc00g007190	Serine/threonine phosphatase family protein (AHRD V1 **** C1E0J1_9CHLO); contains Interpro domain(s) IPR015655 Protein phosphatase 2C	4.86	5.44	0.33	0.27	0.32	0.13	0.69	0.41	0.4	0.48	0.87	0.34	0.46	0.26	0.79	0.65	0.43	0.26	0.36	0.58	0.8	0.37	0.4	0.58	0.26	0.45	0.56	0.99	ORTHOMCL2525	2	2	2	2	0
Solyc00g007200	MLO-like protein 3 (AHRD V1 ***- C6EWE6_VITVI); contains Interpro domain(s) IPR004326 Mlo-related protein	6.07	6.26	7.17	5.17	3.7	3.5	19.6	18.08	0.64	0.45	0.16	0.2	0.11	0	0.07	0.18	0	0.1	0.04	0	0.71	0	0	0.36	0	0.12	2.44	2.67	ORTHOMCL739	3	3	5	2	1
Solyc00g007210	Unknown Protein (AHRD V1)	0	0	0	0	0	0	0	0	0	0	0	0	0	0	0	0	0	0	0	0	0	0	0	0	0	0	0	0	NA
Solyc00g007220	Ring finger protein (AHRD V1 ***- O49869_HORVU); contains Interpro domain(s) IPR018957 Zinc finger, C3HC4 RING-type	6.14	6.87	4.01	2.75	1.3	1.33	1.27	1.84	0.66	1.08	0.81	0.42	2.42	1.66	8.13	8.05	16.65	17.89	17.23	21.1	32.63	23.12	37.16	40.71	30.7	31.48	0.13	0.42	ORTHOMCL21063	1	1	0	0	0
Solyc00g007230	Pol polyprotein (AHRD V1 ***- POL_GALV); contains Interpro domain(s) IPR000477 RNA-directed DNA polymerase (reverse transcriptase)	0	0	0	0	0	0	0	0	0	0	0	0	0	0	0	0	0	0	0	0	0	0	0	0.15	0	0	0	0	ORTHOMCL4113	6	0	0	0	0
Solyc00g007240	Retrovirus-related Pol polyprotein from transposon TNT 1-94 (AHRD V1 ***- POLX_TOBAC)	0	0	0	0	0	0	0	0	0	0	0	0	0	0	0	0	0	0	0	0	0	0	0	0	0	0	0	0	ORTHOMCL109	35	0	0	4	2
Solyc00g007250	Pol polyprotein (AHRD V1 *-*- POL_RSVSA); contains Interpro domain(s) IPR001584 Integrase, catalytic core	0	0	0	0	0	0	0	0	0	0	0	0	0	0	0	0	0	0	0	0	0	0	0	0	0	0	0	0	ORTHOMCL109	35	0	0	4	2
Solyc00g007260	Sentrin-specific protease 7 (AHRD V1 *-*- SENP7_HUMAN); contains Interpro domain(s) IPR003653 Peptidase C48, SUMO/Sentrin/Ubl1	6.74	5.89	5.2	5.54	5.01	4.81	6.17	5.86	8.19	8.09	9.31	6.44	8.79	6.59	4.2	5.16	3.68	4.16	4.02	3.94	6.47	8.13	6.4	7.77	6.93	7.7	2.22	6.56	ORTHOMCL14848	1	1	0	1	0
Solyc00g007270	Translation initiation factor (AHRD V1 ***- A6ZWQ9_YEAS7); contains Interpro domain(s) IPR002769 Translation initiation factor IF6	148.79	146.11	172.86	175.38	173.68	171.18	187.33	177.43	177.92	175.74	188.93	162.58	281.31	267.68	276.05	274.48	208.2	205.39	130.51	123.34	137.62	128.48	118.64	114.84	79.25	69.09	101.82	99.46	ORTHOMCL8273	1	1	1	1	1
Solyc00g007290	Ulp1 protease family C-terminal catalytic domain containing protein (AHRD V1 ***- Q60D46_SOLDE); contains Interpro domain(s) IPR003653 Peptidase C48, SUMO/Sentrin/Ubl1	0.26	0	0	0	0	0	0	0	0	0	0	0	0	0	0	0	0	0	0	0	0	0	0	0	0	0	0	0	ORTHOMCL1055	10	1	0	0	0
Solyc00g007300	Lrr, resistance protein fragment	4.65	4.29	7.63	8.22	3.81	3.81	5.04	5.61	3.7	2.88	6.46	5.32	7.28	8.73	7.06	8.12	4.63	4.45	10.09	8.91	8.19	9.03	23.05	22.23	31.89	33.76	6.05	3.42	ORTHOMCL5471	2	1	2	1	0
Solyc00g007310	Unknown Protein (AHRD V1)	0	0	0	0	0	0	0	0	0	0	0	0	0	0	0	0	0	0	0	0	0	0	0	0	0	0	0	0	ORTHOMCL1621	9	0	0	0	0
Solyc00g007320	Unknown Protein (AHRD V1)	0	0	0	0	0	0	0	0	0	0	0	0	0	0	0	0	0	0	0	0	0	0	0	0	0	0	0	0	NA
Solyc00g007330	Unknown Protein (AHRD V1)	0	0	0	0	0	0	0	0	0	0	0	0	0	0	0	0	0	0	0	0	0	0	0	0	0	0	0	0	ORTHOMCL2854	7	0	0	0	0
Solyc00g007340	Unknown Protein (AHRD V1)	0	0	0	0	0	0	0	0	0	0	0	0	0	0	0	0	0	0	0	0	0	0	0	0	0	0	0	0	NA
Solyc00g007350	Zinc finger CCCH domain-containing protein 30 (AHRD V1 *-*- C3H30_ORYSJ)	0	0.1	0	0	0	0	0	0	0	0	0	0	0	0	0	0	0	0	0	0	0	0	0	0	0	0	0	0	ORTHOMCL2854	7	0	0	0	0
Solyc00g007450	Zinc finger CCCH domain-containing protein 30 (AHRD V1 *-*- C3H30_ORYSJ); contains Interpro domain(s) IPR000571 Zinc finger, CCCH-type	0	0	0	0	0	0	0	0	0	0	0	0	0	0	0	0	0	0	0	0	0	0	0	0	0	0	0	0	ORTHOMCL2854	7	0	0	0	0
Solyc00g007550	Unknown Protein (AHRD V1)	0	0	0	0	0	0	0.92	0.92	0	1.08	1.3	4.54	0.88	1.78	1.18	0	0.83	0	0	0.71	1.19	0	1.35	0.86	0.89	0	0	0	NA
Solyc00g007560	Serine/threonine-protein phosphatase 7 long form homolog (AHRD V1 *--- PPP7L_ARATH); contains Interpro domain(s) IPR019557 Aminotransferase-like, plant mobile domain	0.09	0.09	0	0.11	0	0.11	0	0	0	0	0	0	0.32	0.11	0	0.12	0	0	0	0	0.14	0	0.32	0.1	0	0	0	0	NA
Solyc00g007570	Polygalacturonase (AHRD V1 ***- B6TPQ7_MAIZE); contains Interpro domain(s) IPR000743 Glycoside hydrolase, family 28	0	0	0	0	0	1.71	0	1.33	0	0.52	0	0	0	0	0	0	0	0	0	0	0	0	0	0	0	0	0	0	NA
Solyc00g007580	Mutator-like transposase (AHRD V1 *-*- Q9LTH0_ARATH)	0	0	0	0	0	0	0	0	0	0	0	0	0	0	0	0	0	0	0	0	0	0	0	0	0	0	0	0	NA
Solyc00g007590	Unknown Protein (AHRD V1)	0	0	0	0	0	0	0	0	0	0	0	0	0	0	0	0	0	0	0	0	0	0	0	0	0	0	0	0	ORTHOMCL225	23	3	0	0	0
Solyc00g007600	Meiotic recombination protein DMC1 (AHRD V1 *-*- B4FMC1_MAIZE)	0.34	0	0.4	0	0.39	0.2	0.2	0.2	0.24	0	0.58	0.5	0.39	0.2	0.26	0.65	0.18	0	0	0.16	0	0	0	0	0	0	0	0	ORTHOMCL13975	2	1	0	0	0
Solyc00g007610	Unknown Protein (AHRD V1)	0	0	0	0	0	0	0	0	0	0	0	0	0	0	0	0	0	0	0	0	0	0	0	0	0	0	0	0	NA
Solyc00g007910	Unknown Protein (AHRD V1)	0	0	0	0	0	0	0	0	0	0	0	0	0	0	0	0	0	0	0	0	0	0	0	0	0	0	0	0	ORTHOMCL51	53	0	0	0	0
Solyc00g007920	Unknown Protein (AHRD V1)	0	0	0	0	0	0	0	0	0	0	0	0	0	0	0	0	0	0	0	0	0	0	0	0	0	0	0	0	ORTHOMCL51	53	0	0	0	0
Solyc00g007930	Unknown Protein (AHRD V1)	0	0	0	0	0	0	0	0	0	0	0	0	0	0	0	0	0	0	0	0	0	0	0	0	0	0	0	0	ORTHOMCL51	53	0	0	0	0
Solyc00g007940	Unknown Protein (AHRD V1)	0	0	0	0	0	0	0	0	0	0	0	0	0	0	0	0	0	0	0	0	0	0	0	0	0	0	0	0.13	ORTHOMCL51	53	0	0	0	0
Solyc00g007950	Unknown Protein (AHRD V1)	0	0	0	0	0	0	0	0	0	0	0	0	0	0	0	0	0	0	0	0	0	0	0	0	0	0	0	0	ORTHOMCL51	53	0	0	0	0
Solyc00g007960	Unknown Protein (AHRD V1)	0	0	0	0	0	0	0	0	0	0	0	0	0	0	0	0	0	0	0	0	0	0	0	0	0	0	0	0	ORTHOMCL51	53	0	0	0	0
Solyc00g007970	Unknown Protein (AHRD V1)	0	0	0	0	0	0	0	0	0	0	0	0	0	0	0	0	0	0	0	0	0	0	0	0	0	0	0	0	ORTHOMCL51	53	0	0	0	0
Solyc00g007980	Unknown Protein (AHRD V1)	0	0	0	0	0	0	0	0	0	0	0	0	0	0	0	0	0	0	0	0	0	0	0	0	0	0	0	0	ORTHOMCL51	53	0	0	0	0
Solyc00g007990	Unknown Protein (AHRD V1)	0	0	0	0	0	0	0	0	0	0	0	0	0	0	0	0	0	0	0	0	0	0	0	0	0	0	0	0	ORTHOMCL226	26	0	0	0	0
Solyc00g008000	Unknown Protein (AHRD V1)	0	0	0	0	0	0	0	0	0	0	0	0	0	0	0	0	0	0	0	0	0	0	0	0	0	0	0	0.08	ORTHOMCL51	53	0	0	0	0
Solyc00g008010	Unknown Protein (AHRD V1)	0	0	0	0	0	0	0	0	0	0	0	0	0	0	0	0	0	0	0	0	0	0	0	0	0	0	0	0	ORTHOMCL51	53	0	0	0	0
Solyc00g008020	Unknown Protein (AHRD V1)	0	0	0	0	0	0	0	0	0	0	0	0	0	0	0	0	0	0	0	0	0	0	0	0	0	0	0	0	ORTHOMCL51	53	0	0	0	0
Solyc00g008030	Unknown Protein (AHRD V1)	0	0	0	0	0	0	0	0	0	0	0	0	0	0	0	0	0	0	0	0	0	0	0	0	0	0	0	0	ORTHOMCL51	53	0	0	0	0
Solyc00g008040	Unknown Protein (AHRD V1)	0	0	0	0	0	0	0	0	0	0	0	0	0	0	0	0	0	0	0	0	0	0	0	0	0	0	0	0	ORTHOMCL51	53	0	0	0	0
Solyc00g008050	Unknown Protein (AHRD V1)	0	0	0	0	0	0	0	0	0	0	0	0	0	0	0	0	0	0	0	0	0	0	0	0	0	0	0	0	ORTHOMCL51	53	0	0	0	0
Solyc00g008060	Unknown Protein (AHRD V1)	0	0	0	0	0	0	0	0	0	0	0	0	0	0	0	0	0	0	0	0	0	0	0	0	0	0	0	0	ORTHOMCL51	53	0	0	0	0
Solyc00g008070	Unknown Protein (AHRD V1)	0	0	0	0	0	0	0	0	0	0	0	0	0	0	0	0	0	0	0	0	0	0	0	0	0	0	0	0	ORTHOMCL51	53	0	0	0	0
Solyc00g008080	Unknown Protein (AHRD V1)	0	0	0	0	0	0	0	0	0	0	0	0	0	0	0	0	0	0	0	0	0	0	0	0	0	0	0	0	ORTHOMCL51	53	0	0	0	0
Solyc00g008090	Unknown Protein (AHRD V1)	0	0	0	0	0	0	0	0	0	0	0	0	0	0	0	0	0	0	0	0	0	0	0	0	0	0	0	0	ORTHOMCL51	53	0	0	0	0
Solyc00g008100	Unknown Protein (AHRD V1)	0	0	0	0	0	0	0	0	0	0	0	0	0	0	0	0	0	0	0	0	0	0	0	0	0	0	0	0	ORTHOMCL51	53	0	0	0	0
Solyc00g008110	Unknown Protein (AHRD V1)	0	0	0	0	0	0	0	0	0	0	0	0	0	0	0	0	0	0	0	0	0	0	0	0	0	0	0	0	ORTHOMCL51	53	0	0	0	0
Solyc00g008120	Unknown Protein (AHRD V1)	0	0	0	0	0	0	0	0	0	0	0	0	0	0	0	0	0	0	0	0	0	0	0	0	0	0	0	0	ORTHOMCL51	53	0	0	0	0
Solyc00g008130	Unknown Protein (AHRD V1)	0	0	0	0	0	0	0	0	0	0	0	0	0	0	0	0	0	0	0	0	0	0	0	0	0	0	0	0	ORTHOMCL51	53	0	0	0	0
Solyc00g008140	Unknown Protein (AHRD V1)	0	0	0	0	0	0	0	0	0	0	0	0	0	0	0	0	0	0	0	0	0	0	0	0	0	0	0	0	ORTHOMCL51	53	0	0	0	0
Solyc00g008150	Unknown Protein (AHRD V1)	0	0	0	0	0	0	0	0	0	0	0	0	0	0	0	0	0	0	0	0	0	0	0	0	0	0	0	0	ORTHOMCL51	53	0	0	0	0
Solyc00g008160	Unknown Protein (AHRD V1)	0	0	0	0	0	0	0	0	0	0	0	0	0	0	0	0	0	0	0	0	0	0	0	0	0	0	0	0	ORTHOMCL51	53	0	0	0	0
Solyc00g008260	Unknown Protein (AHRD V1)	0	0	0	0	0	0	0	0	0	0	0	0	0	0	0	0	0	0	0	0	0	0	0	0	0	0	0	0	NA
Solyc00g008270	Unknown Protein (AHRD V1)	0	0	0	0	0	0	0	0	0	0	0	0	0	0	0	0	0	0	0	0	0	0	0	0	0	0	0	0	ORTHOMCL51	53	0	0	0	0
Solyc00g008570	Unknown Protein (AHRD V1)	0	0	0	0	0	0	0	0	0	0	0	0	0.64	0	0	0	0	0	0	0	0	0	0	0	0	0	47.78	21.97	ORTHOMCL21067	2	0	0	0	0
Solyc00g008580	Unknown Protein (AHRD V1)	0	0	0	0	0	0	0	0	0	0	0	0	0	0	0	0	0	0	0	0	0	0	0	0	0	0	0	0	ORTHOMCL13974	3	0	0	0	0
Solyc00g008680	Calcium binding protein-like (AHRD V1 *--- Q656S9_ORYSJ); contains Interpro domain(s) IPR011992 EF-Hand type	50.27	48.04	51.3	53.24	45.77	47.66	105.15	100.26	79.97	81.3	90.82	80.67	80.98	80.74	62.37	64.19	82.46	80.66	70.77	68.95	47.44	48.41	54.75	54.99	49.58	46.12	60.2	54.26	ORTHOMCL7384	1	1	1	1	1
Solyc00g008690	Unknown Protein (AHRD V1)	0	0	0	0	0	0	0	0	0	0	0	0	0	0	0	0	0	0	0	0	0	0	0	0	0	0	0	0	ORTHOMCL394	19	0	0	0	0
Solyc00g008800	Unknown Protein (AHRD V1)	0	0	0	0	0	0	0	0	0	0	0	0	0	0	0	0	0	0	0	0	0	0	0	0	0	0	0	0	NA
Solyc00g008900	Unknown Protein (AHRD V1)	0	0	0	0	0	0	0	0	0	0	0	0	0	0	0	0	0	0	0	0	0	0	0	0	0	0	0	0	ORTHOMCL226	26	0	0	0	0
Solyc00g008910	Unknown Protein (AHRD V1)	0	0	0	0	0	0	0	0	0	0	0	0	0	0	0	0	0	0	0	0	0	0	0	0	0	0	0	0	ORTHOMCL226	26	0	0	0	0
Solyc00g008920	Unknown Protein (AHRD V1)	0	0	0	0	0	0	0	0	0	0	0	0	0	0	0	0	0	0	0	0	0	0	0	0	0	0	0	0	ORTHOMCL51	53	0	0	0	0
Solyc00g009020	Mitochondrial ATP synthase (AHRD V1 ***- B6TLY8_MAIZE)	127.27	122.89	100.65	100.03	59.08	59.23	142.01	133.85	198.98	195.78	168.13	148.94	145.8	144.41	96.12	98.05	71.82	73.27	75.71	70.61	86.26	85.49	75.88	80.1	66.61	58.6	117.67	113.36	ORTHOMCL9596	1	1	1	1	1
Solyc00g009030	Solute carrier family 2, facilitated glucose transporter member 12 (AHRD V1 **** GTR12_BOVIN); contains Interpro domain(s) IPR003663 Sugar/inositol transporter	0.36	0.37	0	0.09	0	0	0	0	0	0.1	0	0	0.08	0	0	0	0	0	0	0	0.11	0	0	0	0	0	0	0	ORTHOMCL13973	1	2	0	0	0
Solyc00g009040	Polyadenylate-binding protein 2 (AHRD V1 **** B6U4M0_MAIZE); contains Interpro domain(s) IPR006515 Polyadenylate binding protein, human types 1, 2, 3, 4	8.55	8.22	2.01	1.83	0	0	0.09	0.05	0.16	0.06	0.27	0.23	0.31	0.23	0	0	0	0	0	0	0.06	0.06	0	0	0	0	0	0	ORTHOMCL459	3	3	5	4	3
Solyc00g009050	UPF0544 protein C5orf45 (AHRD V1 ***- CE045_HUMAN)	0.78	0.72	0.18	0.09	0.09	0	0.47	0.37	0.97	2.41	0.13	0.57	0.27	0.18	0.12	0.59	0	0.09	0	0	0.36	0.12	0.14	0.09	0.09	0	1.52	2.37	ORTHOMCL9987	1	1	1	1	1
Solyc00g009060	Hypoxanthine phosphoribosyltransferase (AHRD V1 ***- B4UWA8_ARAHY); contains Interpro domain(s) IPR005904 Hypoxanthine phosphoribosyl transferase	18.85	15.14	12.51	14.05	11.97	12.87	17.77	16.56	12.85	9.7	10.53	10.04	12.56	12.41	25.84	24.84	23.45	20.96	25.89	30	19.16	20.32	22.32	22.22	16.36	17.61	8.53	10.15	ORTHOMCL13077	1	1	1	1	0
Solyc00g009070	Unknown Protein (AHRD V1)	22.72	25.04	0	0	0	0	3.44	3.7	0	0	0	0	0	0	0	0	0	0	0	0	0	0	0	0	0	0	0	0	ORTHOMCL15564	1	1	1	0	0
Solyc00g009080	Unknown Protein (AHRD V1)	19.2	19.16	8.85	7.99	11.15	13.25	11.66	8.14	26.29	31.09	25.37	24.34	9.4	9.46	12.26	10.12	6.61	7.11	10.41	12.99	6.37	5.61	4.52	3.02	1.21	1.07	27.27	25.79	ORTHOMCL9988	1	1	1	1	1
Solyc00g009090	Receptor like kinase, RLK	0.25	0.1	0.41	0.69	0.14	0.32	3.41	4	0	0	0.04	0	0	0	0	0	0	0	0	0	0.04	0.08	0	0	0.03	0	0	0	ORTHOMCL115	10	11	8	8	4
Solyc00g009100	30S ribosomal protein S1-like (AHRD V1 ***- Q5ZC75_ORYSJ); contains Interpro domain(s) IPR003029 Ribosomal protein S1, RNA binding domain	7.21	7.38	9.81	10.32	32.86	33.63	4.13	3.56	13.13	12.05	9.02	8.76	6.22	6.26	6.61	6.77	7.88	8.79	8.34	8.15	6.81	9.48	8.84	7.39	7.27	5.1	56.8	53.14	ORTHOMCL9989	1	1	1	1	1
Solyc00g009110	Inositol-1 4 5-trisphosphate 5-Phosphatase-like protein (AHRD V1 *-*- Q9M1W5_ARATH); contains Interpro domain(s) IPR000300 Inositol polyphosphate related phosphatase	9.47	8.3	18.52	18.29	15.65	16.12	24.19	22.39	2.61	2.97	4.98	4.01	8.22	7.97	9.13	9.98	2.33	1.91	2.38	2.3	13.25	14.52	2.25	3.76	4	3.79	16.74	15.91	ORTHOMCL5586	1	1	1	1	2
Solyc00g009120	Short-chain dehydrogenase/reductase family protein (AHRD V1 ***- D7LXC9_ARALY); contains Interpro domain(s) IPR002198 Short-chain dehydrogenase/reductase SDR	20.9	17.7	32.44	39.67	22.99	25.91	28.67	24.56	4.99	4.2	8.19	8.05	8.15	8.67	12.21	10.47	6.14	6.25	7.97	9.99	18.39	15.45	16.61	14.42	20.28	22.13	16.95	9.7	NA
Solyc00g009130	Dehydrogenase/reductase SDR family member 12 (AHRD V1 ***- C0HAG0_SALSA); contains Interpro domain(s) IPR002198 Short-chain dehydrogenase/reductase SDR	1.86	2.85	3.53	3.84	1.53	1.46	1.01	1.42	0.7	1.07	1.14	0.75	1.07	0.58	1.17	1.18	0.73	0.38	2.1	2.57	1.44	1.62	1.33	2.36	3.31	5.06	1.77	1.35	ORTHOMCL3226	2	2	1	1	1
Solyc00g009140	Short-chain dehydrogenase/reductase SDR (AHRD V1 ***- A4A816_9GAMM); contains Interpro domain(s) IPR002198 Short-chain dehydrogenase/reductase SDR	29.35	29.04	32.22	33.16	12.59	13.71	7.07	5.9	10.97	10.72	14.71	13.24	7.09	8.25	16.51	13.75	16.87	13.78	35.38	36.68	11.85	9.71	18.96	17.09	36.25	41.26	9.29	5.04	ORTHOMCL3226	2	2	1	1	1
Solyc00g009240	Unknown Protein (AHRD V1)	0	0	0	0	0	0	0	0	0	0	0	0	0	0	0	0	0	0	0	0	0	0	0	0	0	0	0	0	ORTHOMCL11	74	2	0	1	2
Solyc00g009440	Unknown Protein (AHRD V1)	0	0	0	0.56	0	0	0	0	0	0	0	0	0	0	0	0	0	0	0.83	0.86	0	0	0	0	0	0	0	0	ORTHOMCL21062	2	0	0	0	0
Solyc00g009540	Helicase-like protein (AHRD V1 ***- Q5NAA4_ORYSJ); contains Interpro domain(s) IPR010285 Protein of unknown function DUF889, eukaryote	0	0	0	0	0	0	0	0	0	0	0	0	0	0	0	0	0	0	0	0	0	0	0	0	0	0	0	0	NA
Solyc00g009650	Unknown Protein (AHRD V1)	0	0	0	0	0	0	0	0	0	0	0	0	0	0	0	0	0	0	0	0	0	0	0	0	0	0	0	0	ORTHOMCL51	53	0	0	0	0
Solyc00g009660	Unknown Protein (AHRD V1)	0	0	0	0	0	0	0	0	0	0	0	0	0	0	0	0	0	0	0	0	0	0	0	0	0	0	0	0	NA
Solyc00g009760	Cytochrome P450 monooxygenase (Fragment) (AHRD V1 *-*- Q6T4Q1_PYRCO)	0	0	0	0.64	0	0	0	0	0	0.25	0	0	0	0	0	0	0	0	0	0	0	0	0	0	0	0	0.5	2.59	NA
Solyc00g009770	Unknown Protein (AHRD V1)	0	0	0	0	0	0	0	0	0	0	0	0	0	0	0	0	0	0	0	0	0	0	0	0	0	0	0	0	NA
Solyc00g009780	Unknown Protein (AHRD V1)	0	0	0	0	0	0	0	0	0	0	0	0	0	0	0	0	0	0	0	0	0	0	0	0	0	0	0	0	ORTHOMCL4112	6	0	0	0	0
Solyc00g009790	Unknown Protein (AHRD V1)	0	0	0	0	0	0	0	0	0	0	0	0	0	0	0	0	0	0	0	0	0	0	0	0	0	0	0	0	NA
Solyc00g009800	Unknown Protein (AHRD V1)	0	0	0	0	0	0	0	0	0	0	0	0	0	0	0	0	0	0	0	0	0	0	0	0	0	0	0	0	ORTHOMCL4112	6	0	0	0	0
Solyc00g010100	Unknown Protein (AHRD V1)	0	0	0	0	0	0	0	0	0	0	0	0	0	0	0	0	0	0	0	0	0	0	0	0	0	0	0	0	ORTHOMCL21061	2	0	0	0	0
Solyc00g010110	Unknown Protein (AHRD V1)	0	0	0	0	0	0	0	0	0	0	0	0	0	0	0	0	0	0	0	0	0	0	0	0	0	0	0	0	ORTHOMCL21060	2	0	0	0	0
Solyc00g010210	Polyprotein (AHRD V1 ***- Q94HW2_ARATH)	0	0	0	0	0	0	0	0	0	0	0	0	0	0	0	0	0	0	0	0	0	0	0	0	0	0	0	0	NA
Solyc00g010410	Unknown Protein (AHRD V1)	0	0	0	0	0	0	0	0	0	0	0	0	0	0	0	0	0	0	0	0	0	0	0	0	0	0	0	0	NA
Solyc00g010420	Unknown Protein (AHRD V1)	0	0	0	0	0	0	0	0	0	0	0	0	0	0	0	0	0	0	0	0	0	0	0	0	0	0	0	0	ORTHOMCL51	53	0	0	0	0
Solyc00g010520	Unknown Protein (AHRD V1)	0	0	0	0	0	0	0	0	0	0	0	0	0	0	0	0	0	0	0	0	0	0	0	0	0	0	0	0	ORTHOMCL226	26	0	0	0	0
Solyc00g010530	Unknown Protein (AHRD V1)	0	0	0	0	0	0	0	0	0	0	0	0	0	0	0	0	0	0	0	0	0	0	0	0	0	0	0	0	ORTHOMCL13974	3	0	0	0	0
Solyc00g010540	Pol polyprotein (AHRD V1 ***- POL_BAEVM); contains Interpro domain(s) IPR000477 RNA-directed DNA polymerase (reverse transcriptase)	0	0	0.1	0	0	0	0.1	0	0	0	0.14	0	0	0	0	0	0.09	0	0	0	0	0	0	0.09	0	0.11	0	0	ORTHOMCL4113	6	0	0	0	0
Solyc00g010550	Unknown Protein (AHRD V1)	0	0	0	0	0	0	0	0	0	0	0	0	0	0	0	0	0	0	0	0	0	0	0	0	0	0	0	0	NA
Solyc00g010750	Guanylate binding protein 2 (AHRD V1 ***- B2XWS2_PIG); contains Interpro domain(s) IPR015894 Guanylate-binding protein, N-terminal	0.77	0.66	0.75	0.15	1.02	0.3	2.15	0.77	0.71	0.72	1.3	1.13	2.21	1.63	1.18	1.3	0.7	1.58	1.03	1.07	0.8	1.64	2.25	1.44	0.44	1.5	0	0	ORTHOMCL11260	4	0	0	0	0
Solyc00g010760	Helicase-like protein (AHRD V1 *-*- Q9LW42_ARATH); contains Interpro domain(s) IPR010285 Protein of unknown function DUF889, eukaryote	0	0	0	0	0	0	0	0	0	0	0	0	0	0	0.19	0	0	0.14	0.11	0	0	0	0	0	0	0	0	0	NA
Solyc00g010770	Unknown Protein (AHRD V1)	1.8	3.56	1.12	0.72	0.14	0.14	0	0	0	0.17	0	0.18	0	0.28	0.37	0.31	0	0	0.32	0	0	0.19	0	0.13	0	0	2.51	0.87	ORTHOMCL356	9	11	0	0	0
Solyc00g010780	Unknown Protein (AHRD V1)	0	0	0	0	0	0	0	0	0	0	0	0	0	0	0	0	0	0	0	0	0	0	0	0	0	0	0	0	NA
Solyc00g010790	Unknown Protein (AHRD V1)	0	0	0	0	0	0	0	0	0	0	0	0	0	0	0	0	0	0	0	0	0	0	0	0	0	0	0	0	NA
Solyc00g010810	Unknown Protein (AHRD V1)	0	0	0	0	0	0	0	0	0	0	0	0	0	0	0	0	0	0	0	0	0	0	0	0	0	0	0	0	ORTHOMCL678	14	0	0	0	0
Solyc00g010930	Unknown Protein (AHRD V1)	0	0	0	0	0	0	0	0	0	0	0	0	0	0	0	0	0	0	0	0	0	0	0	0	0	0	0	0	ORTHOMCL226	26	0	0	0	0
Solyc00g011130	Unknown Protein (AHRD V1)	0	0	0	0	0	0	0	0	0	0	0	0	0	0	0	0	0	0	0	0	0	0	0	0	0	0	0	0	NA
Solyc00g011140	Unknown Protein (AHRD V1)	0	0	0	0	0	0	0	0	0	0	0	0	0	0	0	0	0	0	0	0	0	0	0	0	0	0	0	0	ORTHOMCL21060	2	0	0	0	0
Solyc00g011150	Unknown Protein (AHRD V1)	0	0	0	0	0	0	0	0	0	0	0	0	0	0	0	0	0	0	0	0	0	0	0	0	0	0	0	0	ORTHOMCL13974	3	0	0	0	0
Solyc00g011160	Unknown Protein (AHRD V1)	0	0	0	0	0	0	0	0	0	0	0	0	0	0	0	0	0	0	0	0	0	0	0	0	0	0	2.27	0	NA
Solyc00g011170	Unknown Protein (AHRD V1)	0	0	0	0	0	0	0	0	0	0	0	0	0	0	0	0	0	0	0	0	0	0	0	0	0	0	0	0	ORTHOMCL2855	7	0	0	0	0
Solyc00g011180	Unknown Protein (AHRD V1)	0	0	0	0	0	0	0	0	0	0	0	0	0	0	0	0	0	0	0	0	0	0	0	0	0	0	0	0	ORTHOMCL226	26	0	0	0	0
Solyc00g011310	Unknown Protein (AHRD V1)	0	0	0	0	0	0	0	0	0	0	0	0	0	0	0	0	0	0	0	0	0	0	0	0	0	0	0	0	ORTHOMCL355	20	0	0	0	0
Solyc00g011550	B3 domain-containing protein At1g49475 (AHRD V1 *-*- Y1475_ARATH); contains Interpro domain(s) IPR003340 Transcriptional factor B3	0	0	0	0	0	0	0	0	0	0	0	0	0.17	0	0	0	0	0	0	0	0	0	0	0	0	0	0	0	ORTHOMCL2853	7	0	0	0	0
Solyc00g011560	E3 ubiquitin-protein ligase SINA-like 10 (AHRD V1 *-*- SIL10_ARATH); contains Interpro domain(s) IPR004162 Seven in absentia protein	0	0	0	0	0	0	0	0.18	0	0	0	0	0.18	0.35	0	0	0	0.17	0.27	0	0	0	0	0	0	0	0	0	ORTHOMCL309	9	0	11	1	1
Solyc00g011660	B3 domain-containing protein At1g49475 (AHRD V1 *-*- Y1475_ARATH); contains Interpro domain(s) IPR003340 Transcriptional factor B3	0	0	0	0	0	0	0	0	0.13	0	0	0	0.21	0.21	0	0	0	0	0	0	0	0	0	0	0	0	0	0.13	ORTHOMCL2853	7	0	0	0	0
Solyc00g011670	Unknown Protein (AHRD V1)	0	0	0	0	0	0	0	0	0	0	0	0	0	0	0	0	0	0	0	0	0	0	0	0	0	0	0	0	NA
Solyc00g011870	Phosphatase 1G (AHRD V1 ***- B5X3X4_SALSA); contains Interpro domain(s) IPR015655 Protein phosphatase 2C	0	0	0	0	0	0	0	0	0	0	0	0	0	0	0	0	0	0	0	0	0	0	0	0	0	0	0	0	NA
Solyc00g011880	AIG2-like protein (AHRD V1 ***- B4FVZ7_MAIZE); contains Interpro domain(s) IPR009288 AIG2-like	12.83	10.89	7.74	7.17	9.48	9.11	9.01	5.47	9.75	10.15	9.01	6.45	6.87	5.7	7.61	9.55	8.46	6.41	4.48	2.72	5.46	6.68	7.5	7.03	6.24	4.21	11.53	8.68	ORTHOMCL2548	2	2	2	1	1
Solyc00g011890	Galactokinase like protein (AHRD V1 **** O23461_ARATH); contains Interpro domain(s) IPR012369 Galactokinase, glycosyltransferase	45.57	43.77	109.89	108.55	13.32	14.62	12.58	11.57	16.54	15.49	19.77	19.48	41.05	42.2	39.26	37.33	79.13	82.72	81.02	86.19	30.02	41.6	66.38	59.48	59.63	60.31	11.61	10.7	ORTHOMCL1376	2	2	2	2	2
Solyc00g012090	Unknown Protein (AHRD V1)	0	0	0	0	0	0	0	0	0	0	0	0	0	0	0	0	0	0	0	0	0	0	0	0	0	0	0	0	NA
Solyc00g012310	Retrovirus-related Pol polyprotein from type-1 retrotransposable element R2 (Fragment) (AHRD V1 **-- PO21_NASVI); contains Interpro domain(s) IPR015706 RNA-directed DNA polymerase (reverse transcriptase), related	0	0	0	0	0	0	0	0	0	0	0	0	0	0	0	0	0	0	0	0	0	0	0	0	0	0	0	0	ORTHOMCL217	3	10	3	0	11
Solyc00g012430	Unknown Protein (AHRD V1)	0	0	0	0	0	0	0	0	0	0	0	0	0	0	0	0	0	0	0	0	0	0	0	0	0	0	0	0	NA
Solyc00g012440	TO54-2 (Fragment) (AHRD V1 ***- Q3LVL5_TAROF)	0	0	0	0	0	0	0	0	0	0	0	0	0	0	0	0	0	0	0	0	0	0	0	0	0	0	0	0	NA
Solyc00g012540	Zinc finger CCCH domain-containing protein 6 (AHRD V1 ***- C3H6_ARATH)	0	0.08	0	0	0	0	0	0	0	0	0	0	0	0	0	0	0	0	0	0	0	0	0	0	0	0	0	0	ORTHOMCL2854	7	0	0	0	0
Solyc00g012640	DNA (cytosine-5)-methyltransferase DRM2 (AHRD V1 **** DRM2_ARATH); contains Interpro domain(s) IPR009060 UBA-like	0	0	0	0	0	0	0	0	0	0	0	0	0	0	0	0	0	0	0	0	0	0	0	0	0	0	0	0	NA
Solyc00g012650	Unknown Protein (AHRD V1)	0	0	0	0	0	0	0	0	0	0	0	0	0	0	0	0	0	0	0	0	0	0	0	0	0	0	0	0	NA
Solyc00g012660	F-box domain containing protein (AHRD V1 ***- B6UBC8_MAIZE); contains Interpro domain(s) IPR001810 Cyclin-like F-box	0	0	0	0	0	0	0	0	0	0	0	0	0	0	0	0	0	0	0	0	0	0	0	0	0	0	0	0	NA
Solyc00g012670	Unknown Protein (AHRD V1)	0	0	0	0	0	0	0	0	0	0	0	0	0	0	0	0	0	0	0	0	0	0	0	0	0	0	0	0	NA
Solyc00g012680	D111/G-patch Zinc finger C2H2-type (AHRD V1 ***- Q2HRQ8_MEDTR)	0	0	0	0	0	0	0	0	0	0	0	0	0	0	0	0	0	0	0	0	0	0	0	0	0	0	0	0	NA
Solyc00g012690	Ovarian tumour otubain (AHRD V1 ***- Q1SL15_MEDTR); contains Interpro domain(s) IPR018289 MULE transposase, conserved domain	0	0	0	0	0	0	0	0	0	0	0	0	0	0	0	0	0	0	0	0	0	0	0	0	0	0	0	0	NA
Solyc00g012700	Ovarian tumour otubain (AHRD V1 ***- Q1SL15_MEDTR); contains Interpro domain(s) IPR004330 Transcription factor, FAR1-related	0	0	0	0	0	0	0	0	0	0	0	0	0	0	0	0	0	0	0	0	0	0	0	0	0	0	0	0	ORTHOMCL22270	1	0	0	1	0
Solyc00g012800	Unknown Protein (AHRD V1)	0	0	0	0	0	0	0	0	0	0	0	0	0	0	0	0	0	0	0	0	0	0	0	0	0	0	0	0	ORTHOMCL51	53	0	0	0	0
Solyc00g012900	Unknown Protein (AHRD V1)	0	0	0	0	0	0	0	0	0	0	0	0	0	0	0	0	0	0	0	0	0	0	0	0	0	0	0	0	ORTHOMCL226	26	0	0	0	0
Solyc00g013000	Unknown Protein (AHRD V1)	0	0	0	0	0	0	0	0	0	0	0	0	0	0	0	0	0	0	0	0	0	0	0	0	0	0	0	0	NA
Solyc00g013100	Unknown Protein (AHRD V1)	0	0	0	0	0	0	0	0	0	0	0	0	0	0	0	0	0	0	0	0	0	0	0	0	0	0	0	1.04	NA
Solyc00g013110	Unknown Protein (AHRD V1)	0	0	0	0	0	0	0	0.38	0	0	0	0.47	0.37	0.37	0	0.41	0.35	0	0	0	0	0	0	0	0	0	0	0	ORTHOMCL21059	1	1	0	0	0
Solyc00g013120	Uncharacterized mitochondrial protein AtMg01330 (AHRD V1 *-*- M1330_ARATH)	0.87	1.4	3.04	3.28	3.81	2.3	12.86	14.34	2.42	2.98	4.85	4.59	3.29	2.16	7.68	8.71	8.38	7.56	6.21	4.49	1.55	1.79	0.44	1.26	0	0.65	0.17	0.72	ORTHOMCL21058	1	1	0	0	0
Solyc00g013130	NADH-quinone oxidoreductase subunit N (AHRD V1 ***- Q7CZK9_AGRT5); contains Interpro domain(s) IPR001750 NADH:ubiquinone/plastoquinone oxidoreductase	2.19	2.24	5.36	5.34	2.24	2.03	19.14	17.8	5.07	5.14	14.49	13.48	21.56	19.75	17.58	16.92	22.3	21.45	15.87	15.14	13.98	7.59	8.46	6.31	5.05	3.62	0.41	2.44	ORTHOMCL9732	2	1	1	1	0
Solyc00g013140	NADH dehydrogenase subunit 5 (Fragment) (AHRD V1 ***- A1XJP5_SIMCH); contains Interpro domain(s) IPR003945 NADH-plastoquinone oxidoreductase, chain 5	1.79	2.08	2.43	2.14	0.56	0.92	3.92	4.65	2.22	2.6	6.26	4.9	8.27	9.31	3.51	2.98	5.81	7.27	4.6	3.36	0.96	0.29	0.65	0.69	0.21	0.48	0	0.18	ORTHOMCL13972	1	1	0	0	0
Solyc00g013150	Unknown Protein (AHRD V1)	0	0	0	0	0	0	0	0	0	0.41	0	0.86	0	0	0	0	0	0	0	0	0	0	0.51	0	0	0	0	0	NA
Solyc00g013160	Unknown Protein (AHRD V1)	0.67	0.68	1.93	2.59	1.51	2.69	11.18	8.97	1.15	1.17	2.54	4.17	4.01	3.84	8.46	10.15	12.28	9.72	10.8	8.92	1.81	1.33	0.58	1.12	0.77	0.43	0	0.48	ORTHOMCL21057	1	1	0	0	0
Solyc00g013170	Unknown Protein (AHRD V1)	0	0	0	0	0	0	0	0	0	0	0	0	0	0	0	0	0	0	0	1.13	0	0	0	0	0	0	0	0	ORTHOMCL21056	1	0	0	0	0
Solyc00g013180	NADH-ubiquinone oxidoreductase chain 4 (AHRD V1 ***- Q5M9Z8_TOBAC); contains Interpro domain(s) IPR001750 NADH:ubiquinone/plastoquinone oxidoreductase	0.48	0.33	1.12	1.15	0.18	0.93	1.74	1.35	1.11	0.23	1.63	3.32	9.77	5.19	0	0.41	0.35	0.9	0.86	0.74	0	0.51	0.56	0	0.56	0.63	0	0.47	ORTHOMCL11683	1	1	0	1	0
Solyc00g013190	Unknown Protein (AHRD V1)	0	0.29	0.97	0	0.32	0.97	1	1	0.39	0.39	0.94	0.82	6.08	5.15	0.43	0.35	0.61	0.63	0.5	0.26	0.43	0	0	0	0	0	0	0	ORTHOMCL21055	1	1	0	0	0
Solyc00g013320	Unknown Protein (AHRD V1)	0	0	0	0	0	0	0	0	0	0	0	0	0	0	0	0	0	0	0	0	0	0	0	0	0	0	0	0	NA
Solyc00g013330	Unknown Protein (AHRD V1)	0	0	0	0	0	0	0	0	0	0	0	0	0	0	0	0	0	0	0	0	0	0	0	0	0	0	0	0	ORTHOMCL355	20	0	0	0	0
Solyc00g013770	Unknown Protein (AHRD V1)	0	0	0	0	0	0	0	0	0	0	0	0	0	0	0	0	0	0	0	0	0	0	0	0	0	0	0	0	ORTHOMCL21054	2	0	0	0	0
Solyc00g014170	Unknown Protein (AHRD V1)	0	0	0	0	0	0	0	0	0	0	0	0	0	0	0	0	0	0	0	0	0	0	0	0	0	0	0	0	ORTHOMCL51	53	0	0	0	0
Solyc00g014180	Unknown Protein (AHRD V1)	0	0	0	0	0	0	0	0	0	0	0	0	0	0	0	0	0	0	0	0	0	0	0	0	0	0	0	0	ORTHOMCL51	53	0	0	0	0
Solyc00g014190	Unknown Protein (AHRD V1)	0	0	0	0	0	0	0	0	0	0	0	0	0	0	0	0	0	0	0	0	0	0	0	0	0	0	0	0	ORTHOMCL51	53	0	0	0	0
Solyc00g014290	Unknown Protein (AHRD V1)	0	0	0	0	0	0	0	0	0	0	0	0	0	0	0	0	0	0	0	0	0	0	0	0	0	0	0	0	ORTHOMCL226	26	0	0	0	0
Solyc00g014390	F-box family protein (AHRD V1 ***- D7L456_ARALY)	0	0	0	0	0	0	0	0	0	0	0	0	0	0	0	0	0	0	0	0	0	0	0	0	0	0	0	0	NA
Solyc00g014790	Unknown Protein (AHRD V1)	0.1	0	0.23	0.24	0	0.23	1.33	0.36	0.14	0.14	1.19	0.89	0.81	0.35	0.78	1.28	0.98	1.36	2.51	2.23	0.94	1.61	0.71	0.34	0.46	0.13	0.56	0	ORTHOMCL21053	2	0	0	0	0
Solyc00g014800	Zinc-finger protein 1 (AHRD V1 *-*- D7KX25_ARALY); contains Interpro domain(s) IPR007087 Zinc finger, C2H2-type	0	0.18	0	0.21	0	0.2	0.42	0.21	0	0	0.29	0	0	0.4	0.27	0	0.38	0.58	0.15	0.64	0	0	0	0.19	0.2	0.23	0	0	ORTHOMCL12119	1	1	1	1	0
Solyc00g014810	Unknown Protein (AHRD V1)	0	0	0	0	0	0	0	0	0	0	0	0	0	0.6	0	0	0	0.58	0	0.48	0	0	0	0	0	0	0	0	ORTHOMCL21052	1	1	0	0	0
Solyc00g014820	Unknown Protein (AHRD V1)	0	0.12	0.14	0	0	0	0.29	0.15	0	0	0.21	0	0.14	0.42	0	0.31	0.26	0	0.43	0.23	0.38	0.39	0	0	0	0.16	0	0	ORTHOMCL21051	1	1	0	0	0
Solyc00g014830	NADH-quinone oxidoreductase subunit D (AHRD V1 ***- C4YU74_9RICK); contains Interpro domain(s) IPR010219 NADH dehydrogenase I, D subunit	4.92	4.2	9.7	8.19	5.36	5.39	15.32	14.33	8.46	8.4	13.81	12.48	19.5	19.47	9.02	8.55	15.54	16.93	10.96	11.85	3.68	2.98	2.4	3.14	2.08	2.43	0.78	1.17	ORTHOMCL14353	1	1	0	1	0
Solyc00g014840	Unknown Protein (AHRD V1)	0.25	0	0.29	0	0	0	0	0.3	0.35	0	0	0.37	0.57	0	0	0.32	0	0	0.22	0.46	0	0	0	0	0	0	0	0	ORTHOMCL21050	1	1	0	0	0
Solyc00g014850	ORF86 (AHRD V1 ***- B6VJY4_VITVI)	0.55	0.84	0.95	1.31	0.62	1.26	1.31	0.66	0	1.54	4.17	4.03	9.73	8.21	1.26	0	0.3	0.92	1.22	0.76	0.42	0	0	0.92	0	0.36	0	1.19	ORTHOMCL21049	1	1	0	0	0
Solyc00g014860	Unknown Protein (AHRD V1)	0	0	0	0	0	0	0	0.43	0	0	0	0	0.41	0	0	0	0	0	0	0	0	0	0	0	0	0	0	0	ORTHOMCL21048	1	1	0	0	0
Solyc00g014960	F-box family protein (AHRD V1 *-*- B9HCS6_POPTR); contains Interpro domain(s) IPR017451 F-box associated type 1	0	0	0	0	0	0	0	0	0	0	0	0	0	0	0	0	0	0	0	0	0	0	0	0	0	0	0	0	ORTHOMCL21047	2	0	0	0	0
Solyc00g014970	Helicase-like protein (AHRD V1 ***- Q9LTU4_ARATH); contains Interpro domain(s) IPR010285 Protein of unknown function DUF889, eukaryote	0	0	0	0	0	0	0	0	0	0	0	0	0	0	0	0	0	0	0	0	0	0	0	0	0	0	0	0	NA
Solyc00g014980	Dihydroflavonol-4-reductase (Fragment) (AHRD V1 *--- DFRA_MEDSA); contains Interpro domain(s) IPR017451 F-box associated type 1	0	0	0	0	0	0	0	0	0	0	0	0	0	0	0	0	0	0	0	0	0	0	0	0	0	0	0	0	NA
Solyc00g014990	Unknown Protein (AHRD V1); contains Interpro domain(s) IPR007749 Protein of unknown function DUF677	0	0	0	0	0	0	0	0	0	0	0	0	0	0	0	0	0	0	0	0	0	0	0	0	0	0	0	0	NA
Solyc00g015000	DNA (Cytosine-5-)-methyltransferase 3 (AHRD V1 ***- B3DGP2_DANRE)	0	0	0	0	0	0	0	0	0	0	0	0	0	0	0	0	0	0	0	0	0	0	0	0	0	0	0	0	NA
Solyc00g015600	Unknown Protein (AHRD V1)	0	0	0	0	0	0	0	0	0	0	0	0	0	0	0	0	0	0	0	0	0	0	0	0	0	0	0	0	ORTHOMCL21046	2	0	0	0	0
Solyc00g015610	Unknown Protein (AHRD V1)	0	0	0	0	0	0	0	0	0	0	0	0	0	0	0	0	0	0	0	0	0	0	0	0	0	0	0	0	ORTHOMCL1620	9	0	0	0	0
Solyc00g015720	Glycosyltransferase-like protein (AHRD V1 **-- D8QTD2_SELML); contains Interpro domain(s) IPR006740 Protein of unknown function DUF604	0	0	0	0	0	0	0	0	0	0	0	0	0	0	0	0	0	0	0	0	0	0	0	0	0	0	0	0	ORTHOMCL5315	2	1	1	1	1
Solyc00g015730	RAMOSA1 C2H2 zinc-finger transcription factor (AHRD V1 ***- Q3ZDP6_TRIDA); contains Interpro domain(s) IPR007087 Zinc finger, C2H2-type	0	0	0	0	0	0	0	0	0	0	0	0	0	0	0	0	0	0	0	0	0	0	0	0	0	0	0	0	ORTHOMCL1858	2	1	2	3	1
Solyc00g015740	Reductase 2 (AHRD V1 ***- Q6TY50_HYDMC); contains Interpro domain(s) IPR018170 Aldo/keto reductase, conserved site	0	0	0	0	0	0	0	0	0	0	0	0	0	0	0	0	0	0	0	0	0	0	0	0	0	0	0	0	ORTHOMCL22853	1	0	1	0	0
Solyc00g015750	Reductase 2 (AHRD V1 ***- Q6TY50_HYDMC); contains Interpro domain(s) IPR018170 Aldo/keto reductase, conserved site	0	0	0	0	0	0	0	0	0	0	0	0	0	0	0	0	0	0	0	0	0	0	0	0	0	0	0	0	ORTHOMCL1434	2	2	2	2	2
Solyc00g015760	CHP-rich zinc finger protein-like (AHRD V1 *-*- Q8H5Y9_ORYSJ); contains Interpro domain(s) IPR011424 C1-like	0	0	0	0	0	0	0	0	0	0	0	0	0	0	0	0	0	0	0	0	0	0	0	0	0	0	0	0	ORTHOMCL22852	1	0	1	0	0
Solyc00g015770	Aldo-keto reductase (AHRD V1 ***- Q84TF0_ARATH); contains Interpro domain(s) IPR020471 Aldo/keto reductase subgroup	0	0	0	0	0	0	0	0	0	0	0	0	0	0	0	0	0	0	0	0	0	0	0	0	0	0	0	0	NA
Solyc00g016470	Unknown Protein (AHRD V1)	0	0	0	0	0	0	0	0	0	0	0	0	0	0	0	0	0	0	0	0	0	0	0	0	0	0	0	0	NA
Solyc00g016480	HAT family dimerisation domain containing protein (AHRD V1 **-- Q53M48_ORYSJ)	0	0	0	0	0	0	0	0	0	0	0	0	0	0	0	0	0	0	0	0	0	0	0	0	0	0	0	0	NA
Solyc00g016490	F-box family protein (AHRD V1 *-*- B9HCS6_POPTR); contains Interpro domain(s) IPR001810 Cyclin-like F-box	0	0	0	0	0	0	0	0	0	0	0	0	0	0	0	0	0	0	0	0	0	0	0	0	0	0	0	0	NA
Solyc00g016590	Unknown Protein (AHRD V1)	0	0	0	0	0	0	0	0	0	0	0	0	0	0	0	0	0	0	0	0	0	0	0	0	0	0	0	0	ORTHOMCL51	53	0	0	0	0
Solyc00g016790	Unknown Protein (AHRD V1)	0	0	0	0	0	0	0	0	0	0	0	0	0	0	0	0	0	0	0	0	0	0	0	0	0	0	0	0	ORTHOMCL51	53	0	0	0	0
Solyc00g016890	Unknown Protein (AHRD V1)	0	0	0	0	0	0	0	0	0	0	0	0	0	0	0	0	0	0	0	0	0	0	0	0	0	0	0	0	ORTHOMCL13971	3	0	0	0	0
Solyc00g016900	Unknown Protein (AHRD V1)	0	0	0	0	0	0	0	0	0	0	0	0	0	0	0	0	0	0	0	0	0	0	0	0	0	0	0	0	ORTHOMCL13971	3	0	0	0	0
Solyc00g016910	Unknown Protein (AHRD V1)	0	0	0	0	0	0	0	0	0	0	0	0	0	0	0	0	0	0	0	0	0	0	0	0	0	0	0	0	ORTHOMCL13971	3	0	0	0	0
Solyc00g017210	Actin (AHRD V1 ***- P93775_STRAF); contains Interpro domain(s) IPR004000 Actin/actin-like	0	0.07	0	0	0	0	0	0	0	0	0	0	0	0	0	0	0	0	0	0	0	0	0	0	0	0	0	0	ORTHOMCL96	11	11	9	5	7
Solyc00g017220	Phantastica transcription factor (Fragment) (AHRD V1 **-* Q7XBQ4_AQUFO)	0	0	0	0	0	0	0	0	0	0	0	0	0	0	0	0	0	0	0	0	0	0	0	0	0	0	0	0	NA
Solyc00g017230	Expansin (AHRD V1 ***- A4GWU6_LITCN); contains Interpro domain(s) IPR007112 Expansin 45, endoglucanase-like IPR007117 Pollen allergen/expansin, C-terminal	0	0	0	0	0	0	0	0	0	0	0	0	0	0	0	0	0	0	0	0	0	0	0	0	0	0	0	0	ORTHOMCL12848	2	1	1	0	0
Solyc00g017530	Gag-Pol polyprotein (AHRD V1 ***- B8YLY3_MEDTR)	0	0	0	0	0	0	0	0	0	0	0	0	0	0	0	0	0	0	0	0	0	0	0	0	0	0	0	0	ORTHOMCL422	18	0	0	0	0
Solyc00g017540	Signal recognition particle 72 kDa protein homolog (AHRD V1 *-*- SRP72_DICDI)	0	0	0	0	0	0	0	0	0	0	0	0	0	0	0	0	0	0	0	0	0	0	0	0	0	0	0	0	ORTHOMCL21045	2	0	0	0	0
Solyc00g017550	Signal recognition particle 72 kDa protein homolog (AHRD V1 *-*- SRP72_DICDI)	0	0	0	0	0	0	0	0	0	0	0	0	0	0	0	0	0	0	0	0	0	0	0	0	0	0	0	0	ORTHOMCL21045	2	0	0	0	0
Solyc00g017750	Unknown Protein (AHRD V1)	0	0	0	0	0	0	0	0	0	0	0	0	0	0	0	0	0	0	0	0	0	0	0	0	0	0	0	0	ORTHOMCL226	26	0	0	0	0
Solyc00g017760	Unknown Protein (AHRD V1)	0	0	0	0	0	0	0	0	0	0	0	0	0	0	0	0	0	0	0	0	0	0	0	0	0	0	0	0	ORTHOMCL226	26	0	0	0	0
Solyc00g017860	Pyridine nucleotide-disulfide oxidoreductase (AHRD V1 **-- D7VUZ3_9FLAO); contains Interpro domain(s) IPR004792 HI0933-like protein	0	0	0	0	0	0	0	0	0	0	0	0	0	0	0	0	0	0	0	0	0	0	0	0	0	0	0	0	NA
Solyc00g017870	TonB family protein (AHRD V1 *-*- C6X0J8_FLAB3)	0	0	0	0	0	0	0	0	0	0	0	0	0	0	0	0	0	0	0	0	0	0	0	0	0	0	0	0	NA
Solyc00g017880	DNA mismatch repair protein mutS (AHRD V1 ***- D7VUY4_9FLAO); contains Interpro domain(s) IPR005748 DNA mismatch repair protein MutS, type 1	0	0	0	0	0	0	0	0	0	0	0	0	0	0	0	0	0	0	0	0	0	0	0	0	0	0	0	0	NA
Solyc00g017890	Conserved predicted inner membrane protein (AHRD V1 **-- C8UPW0_ECO1A); contains Interpro domain(s) IPR007913 Uncharacterised protein family UPF0187	0	0	0	0	0	0	0	0	0	0	0	0	0	0	0	0	0	0	0	0	0	0	0	0	0	0	0	0	NA
Solyc00g017900	tRNA/rRNA methyltransferase (AHRD V1 ***- Q650S4_BACFR); contains Interpro domain(s) IPR001537 tRNA/rRNA methyltransferase, SpoU	0	0	0	0	0	0	0	0	0	0	0	0	0	0	0	0	0	0	0	0	0	0	0	0	0	0	0	0	NA
Solyc00g017910	ATP-NAD/AcoX kinase (AHRD V1 ***- B4D8Y7_9BACT); contains Interpro domain(s) IPR016064 ATP-NAD kinase, PpnK-type	0	0	0	0	0	0	0	0	0	0	0	0	0	0	0	0	0	0	0	0	0	0	0	0	0	0	0	0	NA
Solyc00g017920	Fructose-bisphosphate aldolase (AHRD V1 ***- D7VUX3_9FLAO); contains Interpro domain(s) IPR006411 Fructose-bisphosphate aldolase, class II, yeast/E. coli subtype	0	0	0	0	0	0	0	0	0	0	0	0	0	0	0	0	0	0	0	0	0	0	0	0	0	0	0	0	NA
Solyc00g017930	Acetyl-coenzyme A carboxylase carboxyl transferase subunit beta (AHRD V1 *-*- D0IT46_HELP1); contains Interpro domain(s) IPR000438 Acetyl-CoA carboxylase carboxyl transferase, beta subunit	0	0	0	0	0	0	0	0	0	0	0	0	0	0	0	0	0	0	0	0	0	0	0	0	0	0	0	0	NA
Solyc00g018760	Unknown Protein (AHRD V1)	0	0	0	0	0	0	0	0	0	0	0	0	0	0	0	0	0	0	0	0	0	0	0	0	0	0	0	0	NA
Solyc00g018770	F-box family protein (AHRD V1 *-*- D7L456_ARALY); contains Interpro domain(s) IPR006527 F-box associated	0	0	0	0	0	0	0	0	0	0	0	0	0	0	0	0	0	0	0	0	0	0	0	0	0	0	0	0	ORTHOMCL21047	2	0	0	0	0
Solyc00g018970	Unknown Protein (AHRD V1)	0	0	0	0	0	0	0	0	0	0	0	0	0	0	0	0	0	0	0	0	0	0	0	0	0	0	0	0	ORTHOMCL2855	7	0	0	0	0
Solyc00g019610	Unknown Protein (AHRD V1)	0	0	0	0	0	0	0	0	0	0	0	0	0	0	0	0	0	0	0	0	0	0	0	0	0	0	0	0	NA
Solyc00g019620	PDZ domain containing protein (Fragment) (AHRD V1 *--- A8PIU5_BRUMA); contains Interpro domain(s) IPR001478 PDZ/DHR/GLGF	0	0	0	0	0	0	0	0	0	0	0	0	0	0	0	0	0	0	0	0	0	0	0	0	0	0	0	0	NA
Solyc00g019630	Unknown Protein (AHRD V1)	0	0	0	0	0	0	0	0	0	0	0	0	0	0	0	0	0	0	0	0	0	0	0	0	0	0	0	0	NA
Solyc00g019730	Cytochrome c oxidase subunit 3 (AHRD V1 ***- Q5M9V7_TOBAC); contains Interpro domain(s) IPR000298 Cytochrome c oxidase, subunit III	0.39	0.2	1.13	1.85	0	0	1.16	0.23	1.07	1.9	6.23	2.85	9.1	7.82	0	0.98	0.42	0.65	1.38	1.61	0	0.31	0	0	0	0.5	0	0	ORTHOMCL13003	1	0	1	2	0
Solyc00g019740	ATPase subunit 8 (AHRD V1 ***- B6VJW7_VITVI); contains Interpro domain(s) IPR003319 ATPase, F0 complex, subunit 8, mitochondrial, plant	1.99	1.85	1.9	1.73	0.21	0.63	3.48	4.13	1.76	2.29	15.65	12.56	16.84	13.39	1.12	2.3	1.18	0.81	2.42	3.01	1.97	2.03	0	1.22	0.63	0.47	0	0	ORTHOMCL9729	1	1	1	2	0
Solyc00g019750	Unknown Protein (AHRD V1)	0.41	1.66	0.47	0.49	0.92	0	1.46	0.97	0.56	2.28	3.44	2.4	6.99	8.91	0.63	0.52	0.44	0.46	1.45	1.5	0.63	0	0	0	0	0.53	0	0	ORTHOMCL13970	1	2	0	0	0
Solyc00g019950	NADH-quinone oxidoreductase subunit C (AHRD V1 ***- NUOC_MAGSA); contains Interpro domain(s) IPR001268 NADH:ubiquinone oxidoreductase, 30 kDa subunit	0.6	0.76	0.69	0.53	0	0	1.97	1.25	0.83	0.42	4.54	2.64	4.78	5.5	0.23	0	0.48	0.33	0.26	0.69	0.69	0.48	1.04	1	0.34	0.19	0	0	ORTHOMCL14356	1	1	0	1	0
Solyc00g019960	Unknown Protein (AHRD V1)	0	0	0	0.88	0	0	0	0.44	0	0.52	0	2.72	0	0.85	0	0	0	0.83	0	0.34	0	0	0	0	0	0	0	0	ORTHOMCL21044	1	1	0	0	0
Solyc00g019970	Unknown Protein (AHRD V1)	0	0.38	0	0	0	0.22	0	0	0	0.13	0	3.18	0	0.32	0	0	0	0	0.17	0	0	0	0	0	0	0	0	0	NA
Solyc00g019980	Unknown Protein (AHRD V1)	0	0	0	0	0	0.11	0	0	0.14	0.14	0.33	0.14	0	0.11	0	0	0	0	0.17	0.09	0	0	0	0	0	0	0.14	0	ORTHOMCL21043	1	1	0	0	0
Solyc00g019990	Unknown Protein (AHRD V1)	0	0	0	0	0	0	0	0	0	0	0	0	0	0	0	0.5	0.43	0	0.35	0	0	0	0	0	0	0	0	0	ORTHOMCL21042	1	1	0	0	0
Solyc00g020000	Unknown Protein (AHRD V1)	0	0	0	0	0	0	0	0.59	0	0.69	0	0	0	0	0	0.62	0	0	0	0.45	0	0	0	0	0	0	0	0	ORTHOMCL21041	1	1	0	0	0
Solyc00g020010	Unknown Protein (AHRD V1)	0.75	0.38	0.87	0.9	0	0	0.45	0.9	0.52	0	1.27	0.55	0.43	0	1.15	1.43	1.62	2.1	1.66	2.42	1.16	1.2	0	0.42	0	0	0	0	ORTHOMCL21040	1	1	0	0	0
Solyc00g020020	Unknown Protein (AHRD V1)	0	0.1	0.12	0	0	0	0.24	0.12	0	0.28	0.34	0	0.23	0.57	0	0	0	0.11	0.18	0	0.15	0	0.17	0.11	1.26	0.91	1.39	0	NA
Solyc00g020030	Unknown Protein (AHRD V1)	0	0	0.49	0.51	0	0.49	0.51	1.02	1.77	0.6	2.88	0	0.49	1.96	0.65	1.62	0.92	0	1.13	1.57	0	0	0	0	0	0	2.37	0	NA
Solyc00g020040	Cytochrome c biogenesis (Fragment) (AHRD V1 ***- A4KXV6_9ROSI); contains Interpro domain(s) IPR003544 Cytochrome c-type biogenesis protein CcmB	0	0	0.16	0.66	0.16	0	0.16	0.16	0.19	0.19	0	0.2	0.16	0.32	0	0	0.3	0.15	0.61	1.02	0.21	0	0	0.15	0	0	0	0	ORTHOMCL21773	1	0	0	1	0
Solyc00g020440	Unknown Protein (AHRD V1)	0	0	0	0	0	0	0	0	0	0	0	0	0	0	0	0	0	0	0	0	0	0	0	0	0	0	0	0	ORTHOMCL226	26	0	0	0	0
Solyc00g020540	Aminotransferase-like protein (AHRD V1 *-*- Q6EQM2_ORYSJ); contains Interpro domain(s) IPR019557 Aminotransferase-like, plant mobile domain	0	0	0	0.14	0.05	0	0	0	0.06	0	0	0	0	0	0	0	0	0	0	0	0	0	0	0	0	0	0	0	ORTHOMCL650	2	1	2	0	10
Solyc00g020840	Ferric reductase (AHRD V1 ***- B5KGU9_MALXI); contains Interpro domain(s) IPR013130 Ferric reductase-like transmembrane component, N-terminal	0.11	0.11	0	0.13	0	0	0.26	0	0	0	0.19	0	0	0	0	0	0.12	0	0.1	0.2	0	0	0	0	0.13	0	0	0	NA
Solyc00g020940	Cyclin-L1 (AHRD V1 *-*- D6RKQ3_COPC7); contains Interpro domain(s) IPR015429 Transcription regulator cyclin	0	0	0	0	0	0	0	0	0	0	0	0	0	0	0	0	0	0	0	0	0	0	0	0	0	0	0	0	NA
Solyc00g020950	Unknown Protein (AHRD V1)	0	0	0	0	0	0	0	0	0	0	0	0	0	0	0	0	0	0	0	0	0	0	0	0	0	0	0	0	NA
Solyc00g020960	Unknown Protein (AHRD V1)	0	0	0	0	0	0	0	0	0	0	0	0	0	0	0	0	0	0	0	0	0	0	0	0	0	0	0	0	NA
Solyc00g020970	RING finger protein 13 (AHRD V1 *-*- RNF13_CHICK); contains Interpro domain(s) IPR018957 Zinc finger, C3HC4 RING-type	0	0	0	0	0	0	0	0	0	0	0	0	0	0	0	0	0	0	0	0	0	0	0	0	0	0	0	0	NA
Solyc00g020980	Unknown Protein (AHRD V1)	0	0	0	0	0	0	0	0	0	0	0	0	0	0	0	0	0	0	0	0	0	0	0	0	0	0	0	0	NA
Solyc00g020990	ADP-ribosylation factor-like 8B (AHRD V1 *-*- C5IWT9_SHEEP); contains Interpro domain(s) IPR006689 ARF/SAR superfamily	0	0	0	0	0	0	0	0	0	0	0	0	0	0	0	0	0	0	0	0	0	0	0	0	0	0	0	0	NA
Solyc00g021490	Unknown Protein (AHRD V1)	0	0	0	0	0	0	0	0	0	0	0	0	0	0	0	0	0	0	0	0	0	0	0	0	0	0	0	0	NA
Solyc00g021500	DNA alkylation repair enzyme (AHRD V1 ***- D7VV55_9FLAO); contains Interpro domain(s) IPR014825 DNA alkylation repair enzyme	0	0	0	0	0	0	0	0	0	0	0	0	0	0	0	0	0	0	0	0	0	0	0	0	0	0	0	0	NA
Solyc00g021510	Sodium/hydrogen exchanger (AHRD V1 ***- A6EBA6_9SPHI); contains Interpro domain(s) IPR006153 Cation/H+ exchanger	0	0	0	0	0	0	0	0	0	0	0	0	0	0	0	0	0	0	0	0	0	0	0	0	0	0	0	0	NA
Solyc00g021520	GTP-binding protein HflX (AHRD V1 ***- D7VV52_9FLAO); contains Interpro domain(s) IPR016496 GTP-binding protein, HflX	0	0	0	0	0	0	0	0	0	0	0	0	0	0	0	0	0	0	0	0	0	0	0	0	0	0	0	0	NA
Solyc00g021530	Calcineurin-like phosphoesterase (AHRD V1 **-- Q1Z3M3_PHOPR); contains Interpro domain(s) IPR004843 Metallophosphoesterase	0	0	0	0	0	0	0	0	0	0	0	0	0	0	0	0	0	0	0	0	0	0	0	0	0	0	0	0	NA
Solyc00g021630	NADH-ubiquinone oxidoreductase chain 6 (Fragment) (AHRD V1 ***- Q2PZB4_BRAOB); contains Interpro domain(s) IPR001457 NADH:ubiquinone/plastoquinone oxidoreductase, chain 6	1.04	1.07	2.12	0.94	0.3	0.45	1.41	0.31	1.81	1.28	4.42	5.39	4.94	4.22	0.4	0.33	0.57	0.29	1.16	1.21	1.01	0.63	1.14	0.15	0.45	0.34	0	0	ORTHOMCL14366	1	1	0	1	0
Solyc00g021640	Ribosomal protein S4 (AHRD V1 ***- D5I3A5_CITLA); contains Interpro domain(s) IPR002942 RNA-binding S4	0.51	0.35	0.79	1.02	0.58	0.26	1.29	0.54	1.65	2.23	5.09	5.44	5.92	5.04	1.14	0.94	1.11	0.64	1.72	1.94	0.88	0.82	0.6	1.08	0.52	0.22	0	0.16	ORTHOMCL12999	1	1	1	1	0
Solyc00g021650	Unknown Protein (AHRD V1)	0	0	0	0	0	0	0	0	0	0	0	0	0	0.43	0	0	0	0	0	23.9	0	0	0	0	0	0	0	0	NA
Solyc00g021660	Neutral invertase-like protein (Fragment) (AHRD V1 ***- Q75UP5_IPOBA); contains Interpro domain(s) IPR006937 Plant neutral invertase	0	0	0	0	0	0	0	0	0	0	0	0	0	0	0	0	0	0	0	0	0	0	0	0	0	0	0	0	ORTHOMCL21039	1	1	0	0	0
Solyc00g022070	Unknown Protein (AHRD V1)	0	0	0	0	0	0	0	0	0.77	0	0.94	0	0.64	0.64	0	0.71	0.61	0.63	0	0	0	0	0.98	0	0	0	0	0	ORTHOMCL21038	1	1	0	0	0
Solyc00g022080	Unknown Protein (AHRD V1)	0	0	0	0	0	0	0	0	0.56	0	0	0	0	0	0	0	0	0	0	0	0	0	0	0	0	0	0	0	ORTHOMCL21037	1	1	0	0	0
Solyc00g022090	Unknown Protein (AHRD V1)	0	0	0	0	0	0	0	0	0	0	0	0.36	0.55	0.28	0	0	0	0	0.21	0	0.37	0	0	0	0	0	0	0	NA
Solyc00g022100	Ribosomal protein L10 (Fragment) (AHRD V1 ***- D1KY68_SARPR)	1.6	2.18	3.1	3.4	1.81	2.87	5.55	5.97	1.48	1.25	6.92	5.51	6.94	8.41	2.47	1.13	0.96	2.6	3.95	3.78	2.49	2.84	0.94	2.79	2.05	2.55	0.99	0	NA
Solyc00g022110	Ribosomal protein L2 (AHRD V1 ***- Q5M9S7_TOBAC); contains Interpro domain(s) IPR002171 Ribosomal protein L2	3.92	4.19	12.96	12.86	4.45	5.06	18.7	18.74	6.38	5.03	13.67	11.99	17.61	16.67	11.83	14.17	34	33.23	65.89	64.96	5.48	2.91	3.69	4.52	6.02	7.19	2.54	2.31	ORTHOMCL13002	1	1	1	1	0
Solyc00g022920	Phosphoribosylaminoimidazole carboxylase like protein (AHRD V1 ***- Q84TI2_ARATH); contains Interpro domain(s) IPR013817 Pre-ATP-grasp fold	0	0	0	0	0	0	0	0	0	0	0	0	0	0	0	0	0	0	0	0	0	0	0	0	0	0	0	0	NA
Solyc00g023020	Phosphoribosylaminoimidazole carboxylase ATPase subunit (AHRD V1 ***- A9WGJ1_CHLAA); contains Interpro domain(s) IPR005875 Phosphoribosylaminoimidazole carboxylase, ATPase subunit	0	0	0	0	0	0	0	0	0	0	0	0	0	0	0	0	0	0	0	0	0	0	0	0	0	0	0	0	NA
Solyc00g023030	CER1-like protein (AHRD V1 ***- O80938_ARATH)	0	0	0	0	0	0	0	0	0	0	0	0	0	0	0	0	0	0	0	0	0	0	0	0	0	0	0	0	NA
Solyc00g023040	CER1-like protein (AHRD V1 **-- O80938_ARATH); contains Interpro domain(s) IPR006694 Fatty acid hydroxylase	0	0	0	0	0	0	0	0	0	0	0	0	0	0	0	0	0	0	0	0	0	0	0	0	0	0	0	0	NA
Solyc00g023050	CER1-like protein (AHRD V1 **-- O80938_ARATH); contains Interpro domain(s) IPR006694 Fatty acid hydroxylase	0	0	0	0	0	0	0	0	0	0	0	0	0	0	0	0	0	0	0	0	0	0	0	0	0	0	0	0	NA
Solyc00g023250	Short-chain dehydrogenase/reductase family protein (AHRD V1 ***- D7LJU7_ARALY); contains Interpro domain(s) IPR002347 Glucose/ribitol dehydrogenase	0	0	0	0	0	0	0	0	0	0	0	0	0	0	0	0	0	0	0	0	0	0	0	0	0	0	0	0	ORTHOMCL22857	1	0	1	0	0
Solyc00g023260	ADP-ribosylation factor GTPase activating protein 1 (AHRD V1 *-*- Q0V8A7_BOVIN); contains Interpro domain(s) IPR001164 Arf GTPase activating protein	0	0	0	0	0	0	0	0	0	0	0	0	0	0	0	0	0	0	0	0	0	0	0	0	0	0	0	0	ORTHOMCL22856	1	0	1	0	0
Solyc00g023270	Origin recognition complex subunit 2 (AHRD V1 *-*- Q9XFD6_ORYSJ); contains Interpro domain(s) IPR007220 Origin recognition complex subunit 2	0	0	0	0	0	0	0	0	0	0	0	0	0	0	0	0	0	0	0	0	0	0	0	0	0	0	0	0	NA
Solyc00g023470	Pectinesterase (AHRD V1 **** D8SCR0_SELML); contains Interpro domain(s) IPR000070 Pectinesterase, catalytic	0	0	0	0	0	0	0	0	0	0	0	0	0	0	0	0	0	0	0	0	0	0	0	0	0	0	0	0	ORTHOMCL21036	1	1	0	0	0
Solyc00g023570	Unknown Protein (AHRD V1)	0	0	0	0	0	0	0	0	0	0	0	0	0	0	0	0	0	0	0	0	0	0	0	0	0	0	0	0	ORTHOMCL21035	1	1	0	0	0
Solyc00g023580	Unknown Protein (AHRD V1)	0	0	0	0	0	0	0	0	0.46	0	0.56	0	0.38	0.38	0.51	0	0	0	0	0	0	0	0	0	0	0	0	0	ORTHOMCL21034	1	1	0	0	0
Solyc00g023590	Unknown Protein (AHRD V1)	0.08	0	0	0	0.18	0	0	0.1	0	0.11	0	0.12	0	0	0	0	0	0	0.14	0	0	0.26	0	0.09	0.09	0.32	0	0	NA
Solyc00g023600	Unknown Protein (AHRD V1)	0	0	0	0	0	0	0	0	0	0	0	0	0	0	0	0	0	0	0	0	0	0	0	0	0	0	0	0	NA
Solyc00g023700	Unknown Protein (AHRD V1)	0.14	0	0.33	0.51	0.16	0	0	0	0.4	0.2	0	0	0.16	0.17	0	0.18	0	0	0.38	0	0	0	0	0	0	0	0	0	NA
Solyc00g023710	Unknown Protein (AHRD V1)	0	0	0	0	0	0	0	0	0	0.17	0.21	0	0	0.14	0	0	0	0	0	0.22	0	0	0	0.27	0	0	0	0	NA
Solyc00g024010	FeS assembly SUF system protein (AHRD V1 ***- D7VV18_9FLAO); contains Interpro domain(s) IPR002744 Protein of unknown function DUF59	0	0	0	0	0	0	0	0	0	0	0	0	0	0	0	0	0	0	0	0	0	0	0	0	0	0	0	0	NA
Solyc00g024020	Hydroxymethylglutaryl-CoA lyase (AHRD V1 ***- D7VV16_9FLAO); contains Interpro domain(s) IPR000891 Pyruvate carboxyltransferase	0	0	0	0	0	0	0	0	0	0	0	0	0	0	0	0	0	0	0	0	0	0	0	0	0	0	0	0	NA
Solyc00g024030	Peptidase T (AHRD V1 ***- C6WZN7_FLAB3); contains Interpro domain(s) IPR010161 Peptidase M20B, tripeptide aminopeptidase	0	0	0	0	0	0	0	0	0	0	0	0	0	0	0	0	0	0	0	0	0	0	0	0	0	0	0	0	NA
Solyc00g024040	Thiamine-monophosphate kinase (AHRD V1 ***- C6X363_FLAB3); contains Interpro domain(s) IPR006283 Thiamine-monophosphate kinase	0	0	0	0	0	0	0	0	0	0	0	0	0	0	0	0	0	0	0	0	0	0	0	0	0	0	0	0	NA
Solyc00g024050	Pyridine nucleotide-disulphide oxidoreductase (AHRD V1 **-- C9Q087_9BACT); contains Interpro domain(s) IPR001327 Pyridine nucleotide-disulphide oxidoreductase, NAD-binding region	0	0	0	0	0	0	0	0	0	0	0	0	0	0	0	0	0	0	0	0	0	0	0	0	0	0	0	0	NA
Solyc00g024150	Pterin-4-alpha-carbinolamine dehydratase (AHRD V1 *-** B6T9C1_MAIZE); contains Interpro domain(s) IPR001533 Transcriptional coactivator/pterin dehydratase	73.98	76.98	152.48	149.8	312.01	318.76	6.01	6.01	50.85	47.85	55.79	47.71	31.96	29.01	43.96	41.9	75.11	77.51	54.53	52.9	27.31	29.83	25.46	27.78	9.88	13.39	554.27	543.19	ORTHOMCL6774	1	1	1	1	1
Solyc00g024160	ATP binding protein (AHRD V1 **-- D7MPZ5_ARALY); contains Interpro domain(s) IPR001841 Zinc finger, RING-type	0	0	0.12	0	0	0	0	0	0	0	0	0	0	0	0	0	0	0	0	0.37	0	0	0.18	0	0	0	0	0	ORTHOMCL21033	1	1	0	0	0
Solyc00g024170	Unknown Protein (AHRD V1)	0	0	0.31	0	0	0	0	0	0	0	0	0	0	0	0	0	0	0	0	0	0	0	0	0	0	0	0	0	NA
Solyc00g024370	Unknown Protein (AHRD V1)	0	0	0	0	0	0	0	0	0	0	0	0	0	0	0	0	0	0	0	0	0	0	0	0	0	0	0	0	NA
Solyc00g024570	F-box family protein (AHRD V1 ***- B9I3S8_POPTR); contains Interpro domain(s) IPR001810 Cyclin-like F-box	0	0.05	0	0	0	0	0	0	0	0	0	0	0	0	0	0	0	0	0	0	0	0	0	0	0	0	0	0	ORTHOMCL4111	3	3	0	0	0
Solyc00g024670	Beta-1-3-galactosyl-o-glycosyl-glycoprotein (AHRD V1 **-* B6Z261_WHEAT); contains Interpro domain(s) IPR003406 Glycosyl transferase, family 14	0	0	0	0	0	0	0	0	0	0	0	0	0	0	0	0	0	0	0	0	0	0	0	0	0	0	0	0	ORTHOMCL9312	2	1	1	1	0
Solyc00g024680	Dof zinc finger protein (AHRD V1 ***- Q9M4G1_SOLTU); contains Interpro domain(s) IPR003851 Zinc finger, Dof-type	0	0	0	0	0	0	0	0	0	0	0	0	0	0	0	0	0	0	0	0	0	0	0	0	0	0	0	0	ORTHOMCL22855	1	0	1	0	0
Solyc00g024690	Dof zinc finger protein DOF2.4 (AHRD V1 ***- DOF24_ARATH)	0	0	0	0	0	0	0	0	0	0	0	0	0	0	0	0	0	0	0	0	0	0	0	0	0	0	0	0	NA
Solyc00g025290	Hypothetical protein (nad5 intron) (AHRD V1 **-- Q7M2D8_WHEAT)	10.01	8.26	9.8	10.3	9.95	9.73	14.12	13.68	9.01	8.64	9.52	9.58	17.93	12.97	10.55	7.82	26.87	28.62	16.09	13.47	1.64	1.12	0.92	1.97	1.82	1.14	0	1.53	NA
Solyc00g025300	Unknown Protein (AHRD V1)	0	0	0	0	0	0	0	0	0	0	0	0	0	0	0	0	0	0	0	0	0	0	0	0.59	0	0	0	0	ORTHOMCL21032	1	1	0	0	0
Solyc00g025400	Unknown Protein (AHRD V1)	0	0	0	0	0	0	0	0.14	0	0	0	0	0	0.14	0	0	0.13	0.13	0.32	0	0	0.19	0	0	0	0	0	0	ORTHOMCL21031	2	0	0	0	0
Solyc00g025500	Transcriptional regulator GntR-family (AHRD V1 ***- A9I3B6_BORPD); contains Interpro domain(s) IPR011711 GntR, C-terminal	0	0	0	0	0	0	0	0	0	0	0	0	0	0	0	0	0	0	0	0	0	0	0	0	0	0	0	0	NA
Solyc00g025510	D-isomer specific 2-hydroxyacid dehydrogenase NAD-binding (AHRD V1 ***- Q218F6_RHOPB); contains Interpro domain(s) IPR006140 D-isomer specific 2-hydroxyacid dehydrogenase, NAD-binding	0	0	0	0	0	0	0	0	0	0	0	0	0	0	0	0	0	0	0	0	0	0	0	0	0	0	0	0	NA
Solyc00g025520	Unknown Protein (AHRD V1)	0	0	0	0	0	0	0	0	0	0	0	0	0	0	0	0	0	0	0	0	0	0	0	0	0	0	0	0	NA
Solyc00g025530	Class II aldolase/adducin family protein (AHRD V1 ***- A5W490_PSEP1); contains Interpro domain(s) IPR001303 Class II aldolase/adducin, N-terminal	0	0	0	0	0	0	0	0	0	0	0	0	0	0	0	0	0	0	0	0	0	0	0	0	0	0	0	0	NA
Solyc00g025540	Transcriptional regulator LysR family (AHRD V1 ***- A7IJH0_XANP2); contains Interpro domain(s) IPR005119 LysR, substrate-binding	0	0	0	0	0	0	0	0	0	0	0	0	0	0	0	0	0	0	0	0	0	0	0	0	0	0	0	0	ORTHOMCL21030	2	0	0	0	0
Solyc00g025650	Gag/pol polyprotein (AHRD V1 *--- Q9C5V1_ARATH); contains Interpro domain(s) IPR001878 Zinc finger, CCHC-type	0	0	0	0	0	0	0	0	0	0	0	0	0	0	0	0	0	0	0	0	0	0	0	0	0	0	0	0	ORTHOMCL480	1	0	0	16	0
Solyc00g025660	Unknown Protein (AHRD V1)	0	0	0	0	0	0	0	0	0	0	0	0	0	0	0	0	0	0	0	0	0	0	0	0	0	0	0	0	NA
Solyc00g026160	Ferric reductase oxidase (AHRD V1 **** D6RVS5_HORVU); contains Interpro domain(s) IPR013121 Ferric reductase, NAD binding	0.05	0.05	0.18	0.06	0	0	1.21	0.25	0	0	0	0	0	0	0	0	0.06	0	0.05	0	0	0	0.09	0.06	1.58	0	0	0	ORTHOMCL418	3	6	5	4	1
Solyc00g026860	Glutamate 5-kinase (AHRD V1 ***- D8NNP5_RALSO); contains Interpro domain(s) IPR011529 Glutamate 5-kinase, pro-B	0	0	0	0	0	0	0	0	0	0	0	0	0	0	0	0	0	0	0	0	0	0	0	0	0	0	0	0	NA
Solyc00g026870	GTPase obg (AHRD V1 *-*- C5AAG0_BURGB); contains Interpro domain(s) IPR006169 GTP1/OBG subdomain	0	0	0	0	0	0	0	0	0	0	0	0	0	0	0	0	0	0	0	0	0	0	0	0	0	0	0	0	NA
Solyc00g026880	50S ribosomal protein L21 (AHRD V1 ***- B5SIE7_RALSO); contains Interpro domain(s) IPR001787 Ribosomal protein L21	0	0	0	0	0	0	0	0	0	0	0	0	0	0	0	0	0	0	0	0	0	0	0	0	0	0	0	0	NA
Solyc00g026890	Unknown Protein (AHRD V1)	0	0	0	0	0	0	0	0	0	0	0	0	0	0	0	0	0	0	0	0	0	0	0	0	0	0	0	0	NA
Solyc00g026900	Unknown Protein (AHRD V1)	0	0	0	0	0	0	0	0	0	0	0	0	0	0	0	0	0	0	0	0	0	0	0	0	0	0	0	0	NA
Solyc00g027120	Mutator-like transposase (AHRD V1 ***- Q9SI31_ARATH); contains Interpro domain(s) IPR006564 Zinc finger, PMZ-type	0.1	0	0	0	0	0	0	0	0	0	0	0	0	0	0	0	0	0	0	0	0	0	0	0	0	0	0	0	ORTHOMCL13969	3	0	0	0	0
Solyc00g027130	Sentrin-specific protease 2 (AHRD V1 *-*- SENP2_HUMAN); contains Interpro domain(s) IPR003653 Peptidase C48, SUMO/Sentrin/Ubl1	0.7	0.72	0.27	0	0	0	0	0	0	0.11	0.13	0	0.09	0	0.12	0	0	0	0.41	0.43	0	0	0	0	0	0	0	0	ORTHOMCL134	36	1	0	0	0
Solyc00g027140	Ulp1 protease family C-terminal catalytic domain containing protein (AHRD V1 *-*- Q60D46_SOLDE)	0	0.3	0.06	0	0	0.06	0.12	0.17	0	0	0.08	0	0.06	0.11	0	0	0.05	0.05	0.04	0.31	0	0	0	0	0	0	0	0	ORTHOMCL134	36	1	0	0	0
Solyc00g027640	C17orf39 homolog (AHRD V1 **-- C0HB91_SALSA); contains Interpro domain(s) IPR018618 Vacuolar import and degradation protein Vid24	0	0	0	0	0	0	0	0	0	0	0	0	0	0	0	0	0	0	0	0	0	0	0	0	0	0	0	0	NA
Solyc00g027650	FHY1-3 (AHRD V1 ***- Q8S4Q6_ARATH)	0	0	0	0	0	0	0	0	0	0	0	0	0	0	0	0	0	0	0	0	0	0	0	0	0	0	0	0	ORTHOMCL22854	1	0	1	0	0
Solyc00g027660	WD-40 repeat family protein (AHRD V1 ***- D7LKF0_ARALY)	0	0	0	0	0	0	0	0	0	0	0	0	0	0	0	0	0	0	0	0	0	0	0	0	0	0	0	0	NA
Solyc00g027670	WD-40 repeat family protein (AHRD V1 ***- D7LKF0_ARALY); contains Interpro domain(s) IPR017986 WD40 repeat, region	0	0	0	0	0	0	0	0	0	0	0	0	0	0	0	0	0	0	0	0	0	0	0	0	0	0	0	0	ORTHOMCL1859	3	2	2	1	1
Solyc00g027770	Pectinesterase (AHRD V1 **** B9SVI9_RICCO); contains Interpro domain(s) IPR000070 Pectinesterase, catalytic	18.34	17.75	21.52	22.41	9.64	10.08	22.08	20.07	25.73	23.29	29.84	28.51	46.77	45.27	38.38	34.42	25.66	27.57	31.35	33.09	24.89	22.49	18.21	18.13	14.7	17.27	5.55	3.2	ORTHOMCL8490	1	1	1	1	1
Solyc00g027870	Unknown Protein (AHRD V1)	0	0	0	0	0	0	0	0	0	0	0	0	0	0	0	0	0	0	0	0	0	0	0	0	0	0	0	0	ORTHOMCL73	22	26	0	0	0
Solyc00g027970	Abhydrolase domain-containing protein FAM108B1 (AHRD V1 **-- C0HAS5_SALSA); contains Interpro domain(s) IPR000073 Alpha/beta hydrolase fold-1	0	0	0	0	0	0	0	0	0	0	0	0	0	0	0	0	0	0	0	0	0	0	0	0	0	0	0	0	NA
Solyc00g027980	Esterase/lipase/thioesterase (AHRD V1 *--- B4F8T0_MAIZE)	0	0	0	0	0	0	0	0	0	0	0	0	0	0	0	0	0	0	0	0	0	0	0	0	0	0	0	0	NA
Solyc00g027990	Cellulose synthase-like protein (AHRD V1 ***- B9IPJ4_POPTR); contains Interpro domain(s) IPR005150 Cellulose synthase	0	0	0	0	0	0	0	0	0	0	0	0	0	0	0	0	0	0	0	0	0	0	0	0	0	0	0	0	NA
Solyc00g028090	Type VI secretion-associated protein family (AHRD V1 ***- B5FD91_VIBFM)	0	0	0	0	0	0	0	0	0	0	0	0	0	0	0	0	0	0	0	0	0	0	0	0	0	0	0	0	NA
Solyc00g028100	Unknown Protein (AHRD V1)	0	0	0	0	0	0	0	0	0	0	0	0	0	0	0	0	0	0	0	0	0	0	0	0	0	0	0	0	NA
Solyc00g028110	Rhs element Vgr protein (AHRD V1 **-- A6V8B8_PSEA7); contains Interpro domain(s) IPR017847 Rhs element Vgr protein, subgroup	0	0	0	0	0	0	0	0	0	0	0	0	0	0	0	0	0	0	0	0	0	0	0	0	0	0	0	0	NA
Solyc00g028120	Rhs element Vgr protein (AHRD V1 *--- A6V856_PSEA7); contains Interpro domain(s) IPR018712 Protein of unknown function DUF2235	0	0	0	0	0	0	0	0	0	0	0	0	0	0	0	0	0	0	0	0	0	0	0	0	0	0	0	0	NA
Solyc00g028420	Unknown Protein (AHRD V1)	0	0	0	0	0	0	0	0	0	0	0	0	0	0	0	0	0	0	0	0	0	0	0	0	0	0	0	0	ORTHOMCL11259	4	0	0	0	0
Solyc00g028520	Unknown Protein (AHRD V1)	0	0	0	0	0	0	0	0	0	0	0	0	0	0	0	0	0	0	0	0	0	0	0	0	0	0	0	0	NA
Solyc00g028530	Unknown Protein (AHRD V1)	0	0	0	0	0	0	0	0	0	0	0	0	0	0	0	0	0	0	0	0	0	0	0	0	0	0	0	0	NA
Solyc00g028540	CoA ligase (AHRD V1 ***- D3A3G3_NEISU); contains Interpro domain(s) IPR000873 AMP-dependent synthetase and ligase	0	0	0	0	0	0	0	0	0	0	0	0	0	0	0	0	0	0	0	0	0	0	0	0	0	0	0	0	NA
Solyc00g028550	Transcriptional regulator MarR-family (AHRD V1 *-*- Q1LIK8_RALME); contains Interpro domain(s) IPR000835 Bacterial regulatory protein, MarR	0	0	0	0	0	0	0	0	0	0	0	0	0	0	0	0	0	0	0	0	0	0	0	0	0	0	0	0	NA
Solyc00g028560	Extra-cytoplasmic Solute Receptor protein (AHRD V1 **-- Q1LIK9_RALME); contains Interpro domain(s) IPR005064 Bordetella uptake gene	0	0	0	0	0	0	0	0	0	0	0	0	0	0	0	0	0	0	0	0	0	0	0	0	0	0	0	0	ORTHOMCL21029	1	0	0	0	0
Solyc00g028760	Unknown Protein (AHRD V1)	0	0	0	0	0	0	0	0	0	0	0	0	0	0	0	0	0	0	0	0	0	0	0	0	0	0	0	0	ORTHOMCL21028	2	0	0	0	0
Solyc00g028960	Glutaredoxin family protein (AHRD V1 ***- D7KCA5_ARALY); contains Interpro domain(s) IPR011905 Glutaredoxin-like, plant II	1.64	2.8	0	0	0.31	0.32	0	0.33	0	0	0	0	0	0	0	0	0	0	0	0	0	0	0	0	0	0	9.16	1.98	ORTHOMCL13458	1	1	2	0	0
Solyc00g029060	Unknown Protein (AHRD V1)	0	0	0	0	0	0	0	0	0	0	0	0	0	0	0	0	0	0	0	0	0	0	0	0	0	0	0	0	NA
Solyc00g029070	Unknown Protein (AHRD V1)	0	0	0	0	0	0	0	0	0	0	0	0	0	0	0	0	0	0	0	0	0	0	0	0	0	0	0	0	NA
Solyc00g029080	DNA replication helicase Dna2 (AHRD V1 ***- C5JTK6_AJEDS); contains Interpro domain(s) IPR014808 DNA replication factor Dna2	0	0	0	0	0	0	0	0	0	0	0	0	0	0	0	0	0	0	0	0	0	0	0	0	0	0	0	0	NA
Solyc00g029090	Unknown Protein (AHRD V1)	0	0	0	0	0	0	0	0	0	0	0	0	0	0	0	0	0	0	0	0	0	0	0	0	0	0	0	0	NA
Solyc00g029190	S-adenosyl-L-methionine salicylic acid carboxyl methyltransferase (AHRD V1 **** A7XZE9_9MAGN); contains Interpro domain(s) IPR005299 SAM dependent carboxyl methyltransferase	3.48	3.1	2.07	2.13	1.68	1.28	1.51	1.33	0	0.1	0	0.22	0.08	0.09	0.11	0.09	0	0	0	0	0	0	0	0	0	0	0	0.43	NA
Solyc00g029290	High mobility group protein (AHRD V1 *-*- A8HXE1_CHLRE); contains Interpro domain(s) IPR000910 High mobility group, HMG1/HMG2	0	0	0	0	0	0	0	0	0	0	0	0	0	0	0	0	0	0	0	0	0	0	0	0	0	0	0	0	NA
Solyc00g029300	Vacuolar sorting-associated protein (AHRD V1 *-*- C0NCK1_AJECG)	0	0	0	0	0	0	0	0	0	0	0	0	0	0	0	0	0	0	0	0	0	0	0	0	0	0	0	0	NA
Solyc00g029500	Unknown Protein (AHRD V1)	0	0	0	0	0	0	0	0	0	0	0	0	0	0	0	0	0	0	0	0	0	0	0	0	0	0	0	0	ORTHOMCL2852	7	0	0	0	0
Solyc00g029800	Unknown Protein (AHRD V1); contains Interpro domain(s) IPR013699 Signal recognition particle, SRP72 subunit, RNA-binding	0	0	0	0	0	0	0	0	0	0	0	0	0	0	0	0	0	0	0	0	0	0	0	0	0	0	0	0	ORTHOMCL6212	5	0	0	0	0
Solyc00g030000	Cellulose synthase-4 (AHRD V1 **** Q9LLI6_MAIZE); contains Interpro domain(s) IPR005150 Cellulose synthase	0.11	0	0.33	0.07	0	0	0.14	0.27	0	0	0	0	0	0	0	0	0	0	0	0	0	0	0	0	0	0	0	0	ORTHOMCL2897	2	2	0	3	0
Solyc00g030100	Unknown Protein (AHRD V1)	0	0	0	0	0	0	0	0	0	0.69	0	0	0	0	0	0	0	0	0	0	0	0	0	0	0	0	0	0	NA
Solyc00g030110	Unknown Protein (AHRD V1)	0	0	0	0	0	0	0	0	0	0	0	0	0	0	0	0	0	0	0	0	0	0	0	0	0	0	0	0	ORTHOMCL21027	1	0	0	0	0
Solyc00g030210	Ribosomal RNA small subunit methyltransferase H (AHRD V1 *--- RSMH_RALME); contains Interpro domain(s) IPR001460 Penicillin-binding protein, transpeptidase	0	0	0	0	0	0	0	0	0	0	0	0	0	0	0	0	0	0	0	0	0	0	0	0	0	0	0	0	NA
Solyc00g030510	Polygalacturonase (AHRD V1 ***- Q9MBC0_SALGI); contains Interpro domain(s) IPR000743 Glycoside hydrolase, family 28	909.95	891.42	1025.24	993.06	0.35	0.36	2.15	2	0.77	1.3	0.42	0.64	3.34	4	1.33	1.26	0.6	0.28	0	0	0	0.59	0	0	0	0.65	0	0	ORTHOMCL13968	1	2	0	0	0
Solyc00g030520	Endoplasmic reticulum-Golgi intermediate compartment protein 3 (Predicted) (AHRD V1 *-*- B1MTM4_CALMO); contains Interpro domain(s) IPR012936 Protein of unknown function DUF1692	10.12	10.8	9.54	7.94	3.07	3.43	5.55	4.6	12.7	8.58	8.42	5.92	9.11	5.14	5.65	6.44	3.88	3.24	5.28	5.16	4.75	4.88	3.37	3.03	2.71	2.16	2.07	2.66	ORTHOMCL21026	1	1	0	0	0
Solyc00g030820	Unknown Protein (AHRD V1)	0	0.26	0.59	0	0.57	0.29	0.3	0	0	0	0	0.37	0.29	0	0	0.32	0.27	0	0.22	0.23	0	0	0	0	0	0	0	0	ORTHOMCL11258	4	0	0	0	0
Solyc00g031020	Unknown Protein (AHRD V1)	0	0	0	0	0	0	0	0	0	0	0	0	0	0	0	0	0	0	0	0	0	0	0	0	0	0	0	0	NA
Solyc00g031030	2OG-Fe(II) oxygenase (AHRD V1 **-- B1J9S1_PSEPW); contains Interpro domain(s) IPR005123 Oxoglutarate and iron-dependent oxygenase	0	0	0	0	0	0	0	0	0	0	0	0	0	0	0	0	0	0	0	0	0	0	0	0	0	0	0	0	NA
Solyc00g031040	Adenosine deaminase (AHRD V1 ***- D7I5V8_PSESS); contains Interpro domain(s) IPR006330 Adenosine deaminase	0	0	0	0	0	0	0	0	0	0	0	0	0	0	0	0	0	0	0	0	0	0	0	0	0	0	0	0	NA
Solyc00g031050	Major facilitator family transporter (AHRD V1 **-- Q3JLL5_BURP1); contains Interpro domain(s) IPR016196 Major facilitator superfamily, general substrate transporter	0	0	0	0	0	0	0	0	0	0	0	0	0	0	0	0	0	0	0	0	0	0	0	0	0	0	0	0	NA
Solyc00g031060	Unknown Protein (AHRD V1)	0	0	0	0	0	0	0	0	0	0	0	0	0	0	0	0	0	0	0	0	0	0	0	0	0	0	0	0	NA
Solyc00g031360	D-serine dehydratase (AHRD V1 ***- A3LDF4_PSEAE); contains Interpro domain(s) IPR011780 D-serine ammonia-lyase	0	0	0	0	0	0	0	0	0	0	0	0	0	0	0	0	0	0	0	0	0	0	0	0	0	0	0	0	NA
Solyc00g031370	Transcriptional regulator (AHRD V1 ***- A3NNQ2_BURP6); contains Interpro domain(s) IPR005119 LysR, substrate-binding	0	0	0	0	0	0	0	0	0	0	0	0	0	0	0	0	0	0	0	0	0	0	0	0	0	0	0	0	ORTHOMCL21030	2	0	0	0	0
Solyc00g031380	Unknown Protein (AHRD V1)	0	0	0	0	0	0	0	0	0	0	0	0	0	0	0	0	0	0	0	0	0	0	0	0	0	0	0	0	NA
Solyc00g031390	Unknown Protein (AHRD V1)	0	0	0	0	0	0	0	0	0	0	0	0	0	0	0	0	0	0	0	0	0	0	0	0	0	0	0	0	NA
Solyc00g031490	Unknown Protein (AHRD V1)	0	0	0	0	0	0	0	0	0	0	0	0	0	0	0	0	0	0	0	0	0	0	0	0	0	0	0	0	NA
Solyc00g031500	Unknown Protein (AHRD V1)	0	0	0	0	0	0	0	0	0	0	0	0	0	0	0	0	0	0	0	0	0	0	0	0	0	0	0	0	NA
Solyc00g031700	Aldo/keto reductase (AHRD V1 ***- Q1LHH6_RALME); contains Interpro domain(s) IPR001395 Aldo/keto reductase	0	0	0	0	0	0	0	0	0	0	0	0	0	0	0	0	0	0	0	0	0	0	0	0	0	0	0	0	NA
Solyc00g031710	Unknown Protein (AHRD V1)	0	0	0	0	0	0	0	0	0	0	0	0	0	0	0	0	0	0	0	0	0	0	0	0	0	0	0	0	NA
Solyc00g031720	Copper-translocating P-type ATPase (AHRD V1 ***- B8LAF8_9GAMM); contains Interpro domain(s) IPR006121 Heavy metal transport/detoxification protein	0	0	0	0	0	0	0	0	0	0	0	0	0	0	0	0	0	0	0	0	0	0	0	0	0	0	0	0	NA
Solyc00g031730	Copper-exporting P-type ATPase A (AHRD V1 ***- C2PZP9_BACCE); contains Interpro domain(s) IPR001757 ATPase, P-type, K/Mg/Cd/Cu/Zn/Na/Ca/Na/H-transporter	0	0	0	0	0	0	0	0	0	0	0	0	0	0	0	0	0	0	0	0	0	0	0	0	0	0	0	0	NA
Solyc00g032030	E3 ubiquitin-protein ligase SINA-like 10 (AHRD V1 **** SIL10_ARATH); contains Interpro domain(s) IPR004162 Seven in absentia protein	1.15	0.59	1.56	1.15	0	0	0.92	0.46	0.53	0	0	0.28	1.32	0.67	0.89	2.44	1.25	0.86	1.37	1.42	0.3	0	0	0	0	0	0	0	ORTHOMCL309	9	0	11	1	1
Solyc00g032230	Unknown Protein (AHRD V1)	0	0	0	0	0	0	0	0	0	0	0	0	0	0	0	0	0	0	0	0	0	0	0	0	0	0	0	0	NA
Solyc00g032940	Ulp1 protease family C-terminal catalytic domain containing protein (AHRD V1 ***- Q60D46_SOLDE)	0	0	0	0	0	0	0	0	0	0	0	0	0	0	0	0	0	0	0	0	0	0	0	0	0	0	0	0	ORTHOMCL21025	2	0	0	0	0
Solyc00g033460	S-adenosyl-L-methionine salicylic acid carboxyl methyltransferase 1 (AHRD V1 ***- B5TVE1_TOBAC); contains Interpro domain(s) IPR005299 SAM dependent carboxyl methyltransferase	14.51	15.43	4.92	3.28	0.91	1.06	0	0	6.97	3.85	0.77	1.52	0.26	0	0.18	0.15	0	0	0	0	0	0	0	0	0	0	0.64	0.33	ORTHOMCL21024	1	1	0	0	0
Solyc00g033860	Ketohexokinase (AHRD V1 ***- B2WC01_PYRTR)	0	0	0	0	0	0	0	0	0	0	0	0	0	0	0	0	0	0	0	0	0	0	0	0	0	0	0	0	NA
Solyc00g033870	Predicted CDS Pa_1_1990 (AHRD V1 ***- B2A9W2_PODAN)	0	0	0	0	0	0	0	0	0	0	0	0	0	0	0	0	0	0	0	0	0	0	0	0	0	0	0	0	NA
Solyc00g033880	Oxidoreductase NAD-binding domain-containing protein 1 (AHRD V1 ***- OXND1_MOUSE)	0	0	0	0	0	0	0	0	0	0	0	0	0	0	0	0	0	0	0	0	0	0	0	0	0	0	0	0	NA
Solyc00g033890	Unknown Protein (AHRD V1)	0	0	0	0	0	0	0	0	0	0	0	0	0	0	0	0	0	0	0	0	0	0	0	0	0	0	0	0	NA
Solyc00g033990	Acetyltransferase (AHRD V1 ***- B5GJR9_9ACTO); contains Interpro domain(s) IPR000182 GCN5-related N-acetyltransferase	0	0	0	0	0	0	0	0	0	0	0	0	0	0	0	0	0	0	0	0	0	0	0	0	0	0	0	0	NA
Solyc00g034000	Permease of the major facilitator superfamily (AHRD V1 **-- Q2TW75_ASPOR); contains Interpro domain(s) IPR016196 Major facilitator superfamily, general substrate transporter	0	0	0	0	0	0	0	0	0	0	0	0	0	0	0	0	0	0	0	0	0	0	0	0	0	0	0	0	NA
Solyc00g034010	Unknown Protein (AHRD V1)	0	0	0	0	0	0	0	0	0	0	0	0	0	0	0	0	0	0	0	0	0	0	0	0	0	0	0	0	NA
Solyc00g034810	Calcineurin B-like calcium binding protein (AHRD V1 **** B2ZYT8_VICFA); contains Interpro domain(s) IPR015757 Calcineurin B protein	0	0	0	0	0	0	0.3	0.15	0	0	0	0	0	0	0	0	0	0	0	0	0	0	0	0	0	0	0	0	ORTHOMCL13967	2	1	0	0	0
Solyc00g035010	C2H2 finger domain-containing protein (AHRD V1 *--- C6HL38_AJECH)	0	0	0	0	0	0	0	0	0	0	0	0	0	0	0	0	0	0	0	0	0	0	0	0	0	0	0	0	NA
Solyc00g035020	Unknown Protein (AHRD V1)	0	0	0	0	0	0	0	0	0	0	0	0	0	0	0	0	0	0	0	0	0	0	0	0	0	0	0	0	NA
Solyc00g036320	ARID/BRIGHT DNA binding domain containing protein (AHRD V1 ***- B2CZF7_LOTJA); contains Interpro domain(s) IPR001606 AT-rich interaction region	0.27	0.28	0.32	0	0	0	0	0	0	0	0	0	0	0	0	0	0	0	0	0	0	0	0	0	0	0	0	0	NA
Solyc00g036520	Unknown Protein (AHRD V1)	0	0	0.18	0.18	0	0	0	0	0	0	0	0	0	0	0	0.19	0.17	0	0.27	0.85	0	0	0	0	0	0	0	0	ORTHOMCL21023	2	0	0	0	0
Solyc00g036530	Unknown Protein (AHRD V1)	0	0	0	0	0	0	0	0	0	0	0	0	0	0	0	0	0	0	0	0	0	0	0	0.61	0	0	0	0	ORTHOMCL21022	1	1	0	0	0
Solyc00g036540	50S ribosomal protein L2 chloroplastic (AHRD V1 *-*- A6YA71_9MAGN); contains Interpro domain(s) IPR002171 Ribosomal protein L2	4.24	2.79	4.93	5.79	4.8	6.29	1.09	0.73	3.36	2.98	17.42	14.28	21.87	20.61	5.13	6.16	3.94	5.78	12.11	14.55	8.93	5.32	5.31	3.73	6.97	7.49	9.29	11.41	NA
Solyc00g036740	Unknown Protein (AHRD V1)	0	0	0	0	0	0	0	0	0	0	0	0	0	0	0	0	0	0	0	0	0	0	0	0	0	0	0	0	NA
Solyc00g036750	Unknown Protein (AHRD V1)	0	0	0	0	0	0	0	0	0	0	0	0	0	0	0	0	0	0	0	0	0	0	0	0	0	0	0	0	NA
Solyc00g036760	Proprotein convertase subtilisin/kexin type 5 (AHRD V1 **-- Q0P4Q8_XENTR); contains Interpro domain(s) IPR015500 Peptidase S8, subtilisin-related	0	0	0	0	0	0	0	0	0	0	0	0	0	0	0	0	0	0	0	0	0	0	0	0	0	0	0	0	NA
Solyc00g036960	Unknown Protein (AHRD V1)	0	0	0	0	0	0	0	0	0	0	0	0	0.21	0	0	0	0	0	0	0	0	0	0	0	0	0	0	0	NA
Solyc00g038390	Unknown Protein (AHRD V1)	0	0	0	0	0	0	0	0	0	0	0	0	0	0	0	0	0	0	0	0	0	0	0	0	0	0	0	0	ORTHOMCL226	26	0	0	0	0
Solyc00g039290	Zinc-binding protein (AHRD V1 *-*- Q948W7_PEA); contains Interpro domain(s) IPR006734 Protein of unknown function DUF597	0	0.1	0	0	0	0	0	0	0.13	0	0	0	0	0	0	0	0	0	0	0	0	0	0	0	0	0	0	0	ORTHOMCL1619	8	1	0	0	0
Solyc00g039990	TRNA nucleotidyltransferase (AHRD V1 ***- Q42867_LUPAL)	5.54	4.99	7.67	6.16	4.93	5.64	4.91	5.22	6.4	5.93	5.81	5.84	6.81	6.85	6.71	7.72	4.72	2.82	9.15	8.53	9.22	11.37	9.71	13.89	8.05	12.55	4.42	2.87	NA
Solyc00g040290	Transferase family protein (AHRD V1 **-* D7KID7_ARALY); contains Interpro domain(s) IPR003480 Transferase	0	0	0	0	0	0	7.35	7.83	0	0	0	0	0	0	0	0	0	0	0	0	0	0	0	0	0	0	0	0	ORTHOMCL4110	3	3	0	0	0
Solyc00g040390	Hydroxycinnamoyl CoA quinate transferase (AHRD V1 **-* D6BK25_CYNSC); contains Interpro domain(s) IPR003480 Transferase	0	0	0	0	0	0	4.85	5.29	0	0	0	0	0	0	0	0	0	0	0	0	0	0	0	0	0	0	0	0	ORTHOMCL4110	3	3	0	0	0
Solyc00g040490	Unknown Protein (AHRD V1)	0	0	0	0	0	0	0	0	0	0	0	0	0	0	0	0	0	0	0	0	0	0	0	0	0	0	0	0	NA
Solyc00g041090	Vacuolar-processing enzyme (AHRD V1 ***- B9RBP3_RICCO); contains Interpro domain(s) IPR001096 Peptidase C13, legumain	0	0.3	0.34	0	0	0	0	0	0	0	0	0	0	0	0	0	0	0	0	0	0	0	0	0.33	0	0	0	0	NA
Solyc00g041190	Acyl carrier protein (AHRD V1 ***- A5V2E4_SPHWW); contains Interpro domain(s) IPR003231 Acyl carrier protein (ACP)	0	0	0	0	0	0	0	0	0	0	0	0	0	0	0	0	0	0	0	0	0	0	0	0	0	0	0	0	NA
Solyc00g041200	Unknown Protein (AHRD V1)	0	0	0	0	0	0	0	0	0	0	0	0	0	0	0	0	0	0	0	0	0	0	0	0	0	0	0	0	NA
Solyc00g041210	Tetratricopeptide TPR_2 repeat protein (AHRD V1 *-*- A7IHP8_XANP2)	0	0	0	0	0	0	0	0	0	0	0	0	0	0	0	0	0	0	0	0	0	0	0	0	0	0	0	0	NA
Solyc00g041220	UvrABC system protein B (AHRD V1 *-*- Q1GWH4_SPHAL); contains Interpro domain(s) IPR006935 Restriction endonuclease, type I, R subunit/Type III, Res subunit	0	0	0	0	0	0	0	0	0	0	0	0	0	0	0	0	0	0	0	0	0	0	0	0	0	0	0	0	NA
Solyc00g042120	Methyl-accepting chemotaxis sensory transducer (AHRD V1 ***- B1MA17_METRJ); contains Interpro domain(s) IPR003660 HAMP linker domain	0	0	0	0	0	0	0	0	0	0	0	0	0	0	0	0	0	0	0	0	0	0	0	0	0	0	0	0	NA
Solyc00g042130	ATP synthase subunit alpha (AHRD V1 ***- D4Z4I4_SPHJU); contains Interpro domain(s) IPR005294 ATPase, F1 complex, alpha subunit	0	0	0	0	0	0	0	0	0	0	0	0	0	0	0	0	0	0	0	0	0	0	0	0	0	0	0	0	ORTHOMCL5501	1	2	1	2	0
Solyc00g042140	ATP synthase subunit beta (AHRD V1 *-*- D4Z4I7_SPHJU); contains Interpro domain(s) IPR005722 ATPase, F1 complex, beta subunit	0	0	0	0	0	0	0	0	0	0	0	0	0	0	0	0	0	0	0	0	0	0	0	0	0	0	0	0	NA
Solyc00g042640	Helicase-like protein (AHRD V1 *-*- Q9AYF0_ORYSJ); contains Interpro domain(s) IPR010285 Protein of unknown function DUF889, eukaryote	0.04	0.08	0.04	0.18	0.09	0	0	0	0	0.11	0	0	0.09	0.04	0	0.05	0	0	0.03	0	0	0	0	0	0	0	0	0	ORTHOMCL156	9	5	1	0	19
Solyc00g042840	F-box domain containing protein (AHRD V1 ***- Q2QXK7_ORYSJ); contains Interpro domain(s) IPR005174 Protein of unknown function DUF295	0.98	1	0.87	0.36	0.34	0.17	2.52	2.88	2.29	2.11	4.07	3.1	4.31	3.21	1.5	0.95	0.65	1.35	0.13	0.07	0	0	0.26	0	0.09	0	0	0.11	ORTHOMCL13966	2	1	0	0	0
Solyc00g042850	GDSL esterase/lipase 7 (AHRD V1 ***- GLIP7_ARATH); contains Interpro domain(s) IPR001087 Lipase, GDSL	0.14	0	0	0.16	0	0	0	0.16	0	0	0	0	0	0	0	0	0	0	0	0.13	1.06	1.74	1.67	1.22	0.47	0.18	0	0	NA
Solyc00g044350	EPIDERMAL PATTERNING FACTOR-like protein 1 (AHRD V1 ***- EPFL1_ARATH)	15.17	20.64	8.72	7.38	45.92	40.22	0	0	1.62	2.81	0.56	1.23	0.96	0.38	1.28	0.42	0.18	0.19	0	0	0	0.27	0	0	0	0	28.6	26.09	ORTHOMCL12151	1	1	1	0	1
Solyc00g044550	Unknown Protein (AHRD V1)	0	0	0.57	0	0	0.57	0	0	0	0	0	0	0.56	0	0	0	0	0	0	0	0	0	0	0	0	0	0	0	NA
Solyc00g044750	U1 small nuclear ribonucleoprotein A (AHRD V1 *--- SNRPA_DROME); contains Interpro domain(s) IPR012677 Nucleotide-binding, alpha-beta plait	0.85	1.6	0.17	0.34	0.16	0	0	0	0	0.2	0.48	0	0	0	0.22	0.72	0.15	0.16	1.01	1.05	0.66	0	0	0	0	0.74	0	0	ORTHOMCL1054	10	1	0	0	0
Solyc00g045570	Unknown Protein (AHRD V1)	0	0.11	0	0	0	0.12	4.63	7.25	0.58	0.44	0.53	0.31	0.12	0.12	0.48	0.27	0.79	0.47	13.25	13.2	0	0	0.55	0.58	79.33	83.36	0	0	ORTHOMCL1618	9	0	0	0	0
Solyc00g046570	Unknown Protein (AHRD V1)	0	0.16	0	0	0.18	0	0.19	0.37	0	0	0.26	0	0	0.72	0	0	0.17	0	0.14	0.14	1.21	0.25	0.55	1.4	0.72	0.61	0	0	NA
Solyc00g046580	Serine/threonine-protein phosphatase 7 long form homolog (AHRD V1 **-- PPP7L_ARATH); contains Interpro domain(s) IPR019557 Aminotransferase-like, plant mobile domain	0.13	0.13	0.08	0.08	0	0	0	0.08	0.09	0	0	0	0	0	0.2	0	0	0	0	0.06	0.1	0.1	0	0.07	0	0	0	0	ORTHOMCL169	19	9	0	2	1
Solyc00g046980	Unknown Protein (AHRD V1)	0	0	0	0	0	0	0	0	0	0	0	0	0	0	0	0	0	0	0	0	0	0	0	0	0	0	0	0	ORTHOMCL394	19	0	0	0	0
Solyc00g047180	Unknown Protein (AHRD V1)	0	0	1.15	1.98	0	0	0.79	0.4	0	0	0	0.49	0	0	0	0	0	0	0	0	0	0	0	0	0	0	0	0	NA
Solyc00g047190	Unknown Protein (AHRD V1)	0	0	0	0	0	0	0	0	0	0	0	0	0	0	0	0	0	0	0	0	0	0	0	0	0	0	0	0	NA
Solyc00g047200	Cytochrome b (AHRD V1 ***- Q95871_TOBAC); contains Interpro domain(s) IPR016175 Cytochrome b/b6	4.01	0.37	2.54	3.06	0.41	0	3.94	6.12	2.53	4.61	6.79	8.07	10.88	13.05	1.69	1.86	1.58	3.28	3.89	4.05	2.83	1.16	0.64	1.63	1.68	0.95	0	0	NA
Solyc00g047700	Unknown Protein (AHRD V1)	228.45	231.14	230.8	240.52	146.26	155.73	239.86	242.14	498.92	488.38	275.14	237.9	167.8	169.21	184.34	186.61	203.58	202.77	201.23	192.11	105.04	123.97	132.91	134.59	129.71	128.2	323.78	343.7	NA
Solyc00g047810	Unknown Protein (AHRD V1)	0.24	0.24	0	0	0	0	0	0	0	0	0.4	0	0.54	0.81	0	0	0.51	0.26	0.42	1.09	0	0.38	0	0	0	0	0	0	ORTHOMCL21020	2	0	0	0	0
Solyc00g048410	Unknown Protein (AHRD V1)	0	0	0	0.48	0	0	0	0	0	0	0	0	0	0	0	0	0	0	0	0	0	0	0	0	0	0	0	0	ORTHOMCL34	59	1	0	0	0
Solyc00g048510	Phloem lectin (AHRD V1 ***- Q8LK67_9ROSI)	0	0.3	0.51	0.52	0.33	1.01	2.11	2.98	3.85	2.26	2.47	2.16	0.34	0	0.68	0.37	1.11	1.15	0.65	0.68	1.82	2.57	11.79	14.41	7.07	4.19	0	0	ORTHOMCL1574	2	3	2	3	0
Solyc00g049210	Cytochrome c-type biogenesis protein CcmF (AHRD V1 *-*- Q1ZIX1_9GAMM); contains Interpro domain(s) IPR003569 Cytochrome c-type biogenesis protein CcbS	0.14	0.15	0.22	0.23	0.22	0	0.46	0.35	0.4	0.34	1.14	1.42	2.32	2.39	0.07	0	0.21	0.05	0.34	0.58	0.15	0.23	0	0.16	0.06	0.06	0.4	0	ORTHOMCL9727	1	1	1	2	0
Solyc00g049220	Unknown Protein (AHRD V1)	0	0	0	0	0	0	0	0	0	0.58	0	0	0.47	0	0	0	0	0	0	0	0	0	0	0	0	0	0	0	NA
Solyc00g049520	Unknown Protein (AHRD V1)	23.36	27.58	9.59	10.89	22.97	23	78.33	78.43	17.61	14.96	47.98	40.77	62.85	59.46	116.67	115.29	118.15	103.65	29.94	26.19	9.6	6.31	6.92	6.54	10.28	9.17	18.68	5.72	ORTHOMCL21019	1	1	0	0	0
Solyc00g049620	Unknown Protein (AHRD V1)	0	0	0	0	0	0	0	0	0	0	0	0	0	0	0	0	0	0	0	0	0	0	0	0	0	0	0	0	ORTHOMCL2856	7	0	0	0	0
Solyc00g049920	3-oxoacyl-reductase (AHRD V1 **-- B1BY37_CLOPE); contains Interpro domain(s) IPR002347 Glucose/ribitol dehydrogenase	0	0	0	0	0	0	0	0	0	0	0	0	0	0	0	0	0	0	0	0	0	0	0	0	0	0	0	0	NA
Solyc00g050020	Ribonuclease II (AHRD V1 ***- Q46XB5_RALEJ); contains Interpro domain(s) IPR001900 Ribonuclease II and R	0	0	0	0	0	0	0	0	0	0	0	0	0	0	0	0	0	0	0	0	0	0	0	0	0	0	0	0	NA
Solyc00g050030	Shikimate 5-dehydrogenase (AHRD V1 *-*- B1YSX4_BURA4); contains Interpro domain(s) IPR011342 Quinate/shikimate 5-dehydrogenase	0	0	0	0	0	0	0	0	0	0	0	0	0	0	0	0	0	0	0	0	0	0	0	0	0	0	0	0	NA
Solyc00g050130	UDP-glucose glucosyltransferase (AHRD V1 **** D2KTV5_LOTJA); contains Interpro domain(s) IPR002213 UDP-glucuronosyl/UDP-glucosyltransferase	5.12	5.11	4.38	5.61	7.07	6.84	25.33	25	8.81	8.5	7.42	6.55	6.16	5.7	6.85	7.61	2.75	3.12	5.27	5.25	13.71	14.88	9.95	12.58	3.55	4.02	15.32	19.77	ORTHOMCL21018	2	0	0	0	0
Solyc00g050430	BHLH transcription factor (AHRD V1 *-*- A9YWR2_MEDTR); contains Interpro domain(s) IPR011598 Helix-loop-helix DNA-binding	4.44	5.23	5.09	3.1	0.77	1	22.41	22.75	56.28	50.74	43.51	38.89	9.05	9.39	1.23	3.21	0.13	0.28	0	0.11	0.67	0.69	0.11	7.52	0.07	0.32	1.03	1.96	ORTHOMCL2220	1	1	2	3	1
Solyc00g052430	Cytochrome c biogenesis FC (AHRD V1 ***- D5I3C4_CITLA)	0.76	0.35	1.2	0.91	1.49	0.72	1.99	2.32	0.57	0.87	0.93	0.81	1.42	1.19	0.74	0.26	0.67	0.54	1.66	1.08	0.11	0.11	0.36	0.08	0.08	0.09	0	0	NA
Solyc00g052530	Unknown Protein (AHRD V1)	0	0	0.25	0	0	0	0	0.52	0	0	0	0.32	0.5	0	0	0	0	0	0.19	1.01	0.34	0.35	4.58	2.44	11.79	15.32	12.45	6	ORTHOMCL21017	1	1	0	0	0
Solyc00g052540	Unknown Protein (AHRD V1)	0	0.27	0	0	0	0	0	0	0	0	0	0	0	0	0	0	0	0	0	0.25	0	0	0	0	0	0	0	0	NA
Solyc00g052940	Nodulin-like protein (AHRD V1 **-- B6TIX8_MAIZE); contains Interpro domain(s) IPR000620 Protein of unknown function DUF6, transmembrane	13.45	11.17	6.35	6.44	2.24	1.46	2.18	2.75	0.11	0.11	0.13	0	0	0	0	0	0	0	0	0	0	0	0	0	0.09	0.1	3.86	2.29	ORTHOMCL1665	1	1	1	1	5
Solyc00g053440	Transmembrane BAX inhibitor motif-containing protein 4 (AHRD V1 **-- B6T5N6_MAIZE); contains Interpro domain(s) IPR006214 Uncharacterised protein family UPF0005	17.07	14.45	14.72	12.68	13.34	12.06	27.2	28.93	24.88	21.3	16.94	19.96	22.45	18.85	44.66	48.46	38.8	45.15	124.46	124.31	21.03	27.02	27.6	23.24	34.06	32.4	7.18	2.56	NA
Solyc00g053740	ARID/BRIGHT DNA-binding domain-containing protein (AHRD V1 ***- D7KTU4_ARALY); contains Interpro domain(s) IPR008978 HSP20-like chaperone	0.26	0	0	0	0	0	0	0	0	0	0	0	0	0	0	0	0	0	0	0	0	0.42	0	0	0	0	0	0	NA
Solyc00g055940	Secreted repeat protein (AHRD V1 **-- B6JF22_OLICO); contains Interpro domain(s) IPR014558 Uncharacterised conserved lipoprotein	0	0	0	0	0	0	0	0	0	0	0	0	0	0	0	0	0	0	0	0	0	0	0	0	0	0	0	0	NA
Solyc00g055950	Response regulator receiver Transcriptional regulatory protein (AHRD V1 ***- B8CKL9_SHEPW); contains Interpro domain(s) IPR001789 Signal transduction response regulator, receiver region IPR011879 Signal transduction response regulator, phosphate regulon transcriptional regulatory protein phoB	0	0	0	0	0	0	0	0	0	0	0	0	0	0	0	0	0	0	0	0	0	0	0	0	0	0	0	0	NA
Solyc00g055960	Sensor histidine kinase PhoR (AHRD V1 ***- Q4K3L6_PSEF5); contains Interpro domain(s) IPR014310 Signal transduction histidine kinase, phosphate regulon sensor PhoR	0	0	0	0	0	0	0	0	0	0	0	0	0	0	0	0	0	0	0	0	0	0	0	0	0	0	0	0	NA
Solyc00g055970	Unknown Protein (AHRD V1)	0	0	0	0	0	0	0	0	0	0	0	0	0	0	0	0	0	0	0	0	0	0	0	0	0	0	0	0	NA
Solyc00g055980	Unknown Protein (AHRD V1)	0	0	0	0	0	0	0	0	0	0	0	0	0	0	0	0	0	0	0	0	0	0	0	0	0	0	0	0	NA
Solyc00g056180	Unknown Protein (AHRD V1)	0	0	0	0	0	0	0	0	0	0	0	0	0	0	0	0	0	0	0	0	0	0	0	0	0	0	0	0	NA
Solyc00g056680	Lipase-like protein (AHRD V1 ***- Q949E1_ORYSA); contains Interpro domain(s) IPR002921 Lipase, class 3	0.48	0.38	0.55	0.38	0.42	0.55	0.89	1.14	1.39	1.19	1.43	1.4	1.21	1.34	1.06	0.81	1.15	1.37	2.82	2.64	0.9	1.94	1.48	1.54	1.34	1.52	1.4	2.61	ORTHOMCL1356	3	3	1	1	2
Solyc00g057280	B3 domain-containing protein Os02g0598200 (AHRD V1 ***- Y2982_ORYSJ); contains Interpro domain(s) IPR003340 Transcriptional factor B3	0.18	0	0	0	0	0	0	0	0	0	0	0	0	0	0	0	0	0	0	0	0	0	0	0	0	0	0	0	ORTHOMCL21016	2	0	0	0	0
Solyc00g057880	Unknown Protein (AHRD V1)	9.41	10.5	9.2	7.17	10.67	9.14	7.45	9.23	17.49	13.83	16.66	11.67	15.95	13.83	14.17	12.78	8.82	8.17	8.18	7.71	3.32	3.07	6.38	3.83	4.68	4.18	5.97	4.03	NA
Solyc00g058280	Unknown Protein (AHRD V1)	0	0	0.83	0.61	0	0	0	0	0	0	0	0	0	0	0	0	0	0	0	0	0	0	0	0.11	0	0	0	0	ORTHOMCL4109	6	0	0	0	0
Solyc00g058480	Paired amphipathic helix protein Sin3-like 1 (AHRD V1 *-*- SNL1_ARATH); contains Interpro domain(s) IPR003822 Paired amphipathic helix	0	0	0	0	0	0	0	0	0	0	0	0	0	0	0	0	0	0	0	0	0	0	0	0	0	0	0	0	NA
Solyc00g058490	Ulp1 protease family C-terminal catalytic domain containing protein (AHRD V1 ***- Q60D46_SOLDE); contains Interpro domain(s) IPR003653 Peptidase C48, SUMO/Sentrin/Ubl1	0.3	0.2	0.12	0.24	0.11	0.11	0	0	0	0.14	0.67	0	0	0.11	0.15	0.25	0.11	0	0.18	0.09	0.31	0.16	0	0	0.11	0	0	0.29	ORTHOMCL151	34	1	0	0	0
Solyc00g058890	Unknown Protein (AHRD V1)	6.44	6.37	12.8	13.42	49.67	55.14	19.94	21.16	0	0	0	0	0	0	0	0	0	0	0	0	0	0	0	0	0	0	53.3	21.67	ORTHOMCL13965	2	1	0	0	0
Solyc00g058900	GDSL esterase/lipase At2g31540 (AHRD V1 ***- GDL43_ARATH); contains Interpro domain(s) IPR001087 Lipase, GDSL	3.39	2.93	0	0	0	0	0	0	0	0	0	0	0	0	0	0	0	0	0	0	0	0	0	0	0	0	0.21	0.33	ORTHOMCL21015	1	1	0	0	0
Solyc00g059100	WD-repeat protein-like (AHRD V1 **-- Q9FNN2_ARATH); contains Interpro domain(s) IPR020472 G-protein beta WD-40 repeat, region	3.38	3.23	2.44	1.98	0.68	0.87	7.84	7.56	2.91	2.53	5.08	4.21	4.82	5.11	4.28	3.44	4.07	3.46	4.81	4.37	3.73	3.84	2.9	3.03	3.11	2.64	1.78	1.31	NA
Solyc00g059500	CDP-alcohol phosphatidyltransferase (AHRD V1 **-- D3BS60_POLPA)	23.47	28.21	31.38	36.85	15.29	15.58	25.35	30.24	28.46	24.31	21.35	14.71	21.87	29.45	28.01	27.22	22.28	27.69	21.65	24.67	23.69	28.1	28.8	22.34	23.98	24.46	10.64	24.23	ORTHOMCL1564	3	2	2	1	2
Solyc00g060700	Mg chelatase subunit ChlI (AHRD V1 *-*- C7M8Q6_CAPOD); contains Interpro domain(s) IPR019781 WD40 repeat, subgroup	0	0	0	0	0	0	0	0	0	0	0	0	0	0	0	0	0	0	0	0	0	0	0	0	0	0	0	0	NA
Solyc00g060710	Mg chelatase subunit ChlI (AHRD V1 ***- A5FI01_FLAJ1); contains Interpro domain(s) IPR000523 Magnesium chelatase, ChlI subunit	0	0	0	0	0	0	0	0	0	0	0	0	0	0	0	0	0	0	0	0	0	0	0	0	0	0	0	0	NA
Solyc00g060810	Major latex-like protein (AHRD V1 **-- B5THI3_PANGI); contains Interpro domain(s) IPR000916 Bet v I allergen	0	0	0	0	0	0.12	0	0	0	0	0.17	0	0	0.12	5.39	6.94	18.55	18.4	371.84	377.87	2.88	3.78	42.6	50.17	281.14	280.06	0	0.45	NA
Solyc00g062710	Unknown Protein (AHRD V1)	0	0	0	0	0	0	0	0	0.39	0	0	0	0	0	0	0	0	0	0	0	0	0	0	0	0	0	0	0	NA
Solyc00g063110	Non-specific lipid-transfer protein (AHRD V1 ***- B9HZI0_POPTR); contains Interpro domain(s) IPR013770 Plant lipid transfer protein and hydrophobic protein, helical	0	0	0	0	0	0	15.18	13.12	0	0	0	0	0	0	0	0	0	0	0	0	0	0	0	0	0	0	0	0	ORTHOMCL21014	1	1	0	0	0
Solyc00g063510	Fasciculation and elongation protein zeta-2 (AHRD V1 *--- D3PIR9_9MAXI); contains Interpro domain(s) IPR011680 FEZ-like	0	0	0	0	0	0	0	0	0	0	0	0	0	0	0	0	0	0	0	0	0	0	0	0	0	0	0	0	NA
Solyc00g065510	Palmitoyltransferase swf1 (AHRD V1 *-*- B2W9G8_PYRTR)	0	0	0	0	0	0	0	0	0	0	0	0	0	0	0	0	0	0	0	0	0	0	0	0	0	0	0	0	NA
Solyc00g065610	Unknown Protein (AHRD V1)	0	0	0	0	0	0	0	0	0	0	0	0	0	0	0	0	0	0	0	0	0	0	0	0	0	0	0	0	NA
Solyc00g065620	Unknown Protein (AHRD V1)	0	0	0	0	0	0	0	0	0	0	0	0	0	0	0	0	0	0	0	0	0	0	0	0	0	0	0	0	NA
Solyc00g065630	Pre-mRNA-processing protein 45 (AHRD V1 **-- C8V6Z5_EMENI); contains Interpro domain(s) IPR017862 SKI-interacting protein, SKIP	0	0	0	0	0	0	0	0	0	0	0	0	0	0	0	0	0	0	0	0	0	0	0	0	0	0	0	0	NA
Solyc00g065930	Peptidase family S46 dipeptidyl-peptidase 7 (AHRD V1 ***- A5FMW8_FLAJ1); contains Interpro domain(s) IPR019500 Peptidase S46	0	0	0	0	0	0	0	0	0	0	0	0	0	0	0	0	0	0	0	0	0	0	0	0	0	0	0	0	NA
Solyc00g065940	Unknown Protein (AHRD V1)	0	0	0	0	0	0	0	0	0	0	0	0	0	0	0	0	0	0	0	0	0	0	0	0	0	0	0	0	NA
Solyc00g066140	YdiU protein (AHRD V1 ***- C5W4G9_ECOBB); contains Interpro domain(s) IPR003846 Uncharacterised protein family UPF0061	0	0	0	0	0	0	0	0	0	0	0	0	0	0	0	0	0	0	0	0	0	0	0	0	0	0	0	0	NA
Solyc00g066150	Penicillin-binding protein 1A (AHRD V1 ***- D7VV94_9FLAO); contains Interpro domain(s) IPR001460 Penicillin-binding protein, transpeptidase	0	0	0	0	0	0	0	0	0	0	0	0	0	0	0	0	0	0	0	0	0	0	0	0	0	0	0	0	NA
Solyc00g066350	Serine/threonine-protein phosphatase 7 long form homolog (AHRD V1 **-- PPP7L_ARATH); contains Interpro domain(s) IPR019557 Aminotransferase-like, plant mobile domain	3.31	2.26	0	0	0	0	0	0	0	0	0	0	0	0	0	0	0	0	0	0	0	0	0	0	0	0	0	0	NA
Solyc00g066360	Serine/threonine-protein phosphatase 7 long form homolog (AHRD V1 **-- PPP7L_ARATH); contains Interpro domain(s) IPR019557 Aminotransferase-like, plant mobile domain	2.3	3.17	0	0	0	0	0	0	0	0	0	0	0	0	0	0	0	0	0	0	0	0	0	0	0	0	0	0	NA
Solyc00g066370	Unknown Protein (AHRD V1)	0	0	0	0	0	0	0	0	0	0	0	0	0	0	0	0	0	0	0	0	0	0	0	0	0	0	0	0	NA
Solyc00g067470	Unknown Protein (AHRD V1)	3.1	3.7	2.41	3.1	1.76	1.79	3.1	5.58	2.87	4.36	2.63	1.53	5.93	5.97	3.19	2.63	3.37	5.23	2.76	0.96	0	0	0	0	0	0	0	0	NA
Solyc00g068970	Cytochrome P450 like_TBP (AHRD V1 ***- O04892_TOBAC)	0	0	0	0	0	0	0	0	0	0	0	0	0	0	0	0	0	0	0	0	0	0	0	0	0	0	0	0	NA
Solyc00g068980	Unknown Protein (AHRD V1)	1.55	1.06	3.01	3.1	3.52	1.19	8.69	4.96	6.45	3.63	48.17	29.75	57.56	34.03	3.98	3.95	4.49	5.23	4.6	3.82	15.27	2.48	4.53	2.9	0	1.35	41.85	34.49	ORTHOMCL11256	4	0	0	0	0
Solyc00g069680	Unknown Protein (AHRD V1)	0	0	0	0	0	0	0	0	0	0	0	0	0	0	0	0	0	0	0	0	0	0	0	0	0	0	0	0	NA
Solyc00g069880	Unknown Protein (AHRD V1)	0.31	0.11	0.12	0.12	0	0	0.12	0	0	0	0.17	0	0.12	0.12	0.16	0	0.22	0.35	0.46	0.48	0.48	0	0	0	0	0	0	0.45	ORTHOMCL21013	2	0	0	0	0
Solyc00g070680	Unknown Protein (AHRD V1)	0	0	0	0	0	0	0	0	0	0	0	0	0	0	0	0	0	0	0	0	0	0	0	0	0	0	0	0	ORTHOMCL11255	4	0	0	0	0
Solyc00g071180	Cysteine proteinase inhibitor (AHRD V1 *-** Q2VY67_9ERIC); contains Interpro domain(s) IPR000010 Proteinase inhibitor I25, cystatin	674.75	639.68	58.91	54.95	0.61	1.06	214.44	202.34	10.7	11.27	20.7	17.01	0.79	0.26	1.18	0.49	0.5	0.52	0	0	0	0.37	0	0.26	0	2.19	0.11	0.44	ORTHOMCL13964	1	2	0	0	0
Solyc00g071580	Unknown Protein (AHRD V1)	0	0	0	0	0	0	0	0	0	0	0	0	0	0	0	0	0	0	0	0	0	0	0	0	0	0	0	0	NA
Solyc00g071590	TBC1 domain family member 3 (AHRD V1 **-- B6K3A1_SCHJY); contains Interpro domain(s) IPR000195 RabGAP/TBC	0	0	0	0	0	0	0	0	0	0	0	0	0	0	0	0	0	0	0	0	0	0	0	0	0	0	0	0	NA
Solyc00g071600	GTPase activating protein (AHRD V1 ***- A8N3R7_COPC7)	0	0	0	0	0	0	0	0	0	0	0	0	0	0	0	0	0	0	0	0	0	0	0	0	0	0	0	0	NA
Solyc00g072100	LTRGag-pol-polymerase 3 (AHRD V1 *-*- B2BXJ4_ARALY)	24.34	22.64	21.43	20.05	13.79	14.35	16.19	17.65	54.62	47.32	33.74	25.48	27.61	23.2	26.76	28.7	13.68	14.37	9.25	8.88	15.2	16.33	9.89	11.56	5.79	5.17	4.67	3.96	ORTHOMCL11254	4	0	0	0	0
Solyc00g072400	Peroxidase 1 (AHRD V1 ***- A0SWU6_SESRO); contains Interpro domain(s) IPR002016 Haem peroxidase, plant/fungal/bacterial	0	0	0	0	0.08	0	782.88	750.88	0	0	0	0	0	0	0	0.09	0	0	0	0	0	0	0	0	0	0	0	0	ORTHOMCL4153	5	0	0	1	0
Solyc00g072800	Unknown Protein (AHRD V1)	0.27	0.14	0.31	0.65	0	0	0.32	0.16	0.56	0	0.23	0.6	0.46	0	0.42	0.34	0.15	0	0.72	0.5	0	0	0	0	0	0	0	0	ORTHOMCL13963	3	0	0	0	0
Solyc00g073200	Transposon protein-like (AHRD V1 *-*- Q9FN97_ARATH)	0	0	0	0	0	0	0	0	0	0	0	0	0	0	0	0	0	0	0	0	0	0	0	0	0	0	0	0	NA
Solyc00g073900	Unknown Protein (AHRD V1)	0	0	0	0	0	0	0	0	0	0	0	0	0	0	0	0	0	0	0	0	0	0	0	0	0	0	0	0	NA
Solyc00g073910	Unknown Protein (AHRD V1)	0	0	0	0	0	0	0	0	0	0	0	0	0	0	0	0	0	0	0	0	0	0	0	0	0	0	0	0	NA
Solyc00g074210	Mitochondrial import inner membrane translocase subunit TIM16 (AHRD V1 ***- B6UGA4_MAIZE); contains Interpro domain(s) IPR005341 Protein Transporter, Pam16	0	0	0.22	0.23	0	0	0	0	0	0	0	0.28	0	0	0.88	0	0	0.21	0.34	0	2.08	1.52	1.34	2.14	0.22	0.5	3.46	0	NA
Solyc00g074810	DNA processing protein DprA (AHRD V1 ***- D7IDX5_9BACE); contains Interpro domain(s) IPR003488 DNA recombination-mediator protein A	0	0	0	0	0	0	0	0	0	0	0	0	0	0	0	0	0	0	0	0	0	0	0	0	0	0	0	0	NA
Solyc00g074820	Unknown Protein (AHRD V1)	0	0	0	0	0	0	0	0	0	0	0	0	0	0	0	0	0	0	0	0	0	0	0	0	0	0	0	0	NA
Solyc00g074830	FeS assembly protein SufD (AHRD V1 ***- D7VV70_9FLAO); contains Interpro domain(s) IPR000825 SUF system FeS cluster assembly, SufBD	0	0	0	0	0	0	0	0	0	0	0	0	0	0	0	0	0	0	0	0	0	0	0	0	0	0	0	0	NA
Solyc00g075030	Gag polyprotein (AHRD V1 *-*- GAG_FIVPE); contains Interpro domain(s) IPR001878 Zinc finger, CCHC-type	10.27	9.11	90.09	87.38	0	0	0.21	0.72	0	0.12	0	0	0	0.1	0	0	0	0	0	0	0	0	0	0	0	0	0	0	NA
Solyc00g075040	Transposon Ty1-A Gag-Pol polyprotein (AHRD V1 ***- YA11B_YEAST); contains Interpro domain(s) IPR013103 Reverse transcriptase, RNA-dependent DNA polymerase	0.76	0.36	1.96	1.81	0	0	0	0	0	0	0	0	0	0	0	0	0	0	0	0	0	0	0	0	0	0	0	0	ORTHOMCL2112	1	1	0	0	6
Solyc00g075440	Unknown Protein (AHRD V1)	1.84	1.15	0.36	0.73	0.58	0.71	226.52	228.92	0.71	0	0	0.15	0	0	0.16	0	0	0	0.09	0.09	0	0	0	0	0	0	0	0	NA
Solyc00g075450	Unknown Protein (AHRD V1)	1.08	0.83	1.88	2.26	0.61	0.62	480.91	461.86	0.75	0.38	0.91	0	0.62	1.86	4.15	3.08	2.05	2.72	1.44	1	1.25	0.43	0	0.9	0	0	0	0	NA
Solyc00g076250	Unknown Protein (AHRD V1)	0	0	0	0	0	0	0	0	0	0	0	0	0	0	0	0	0	0	0	0	0	0	0	0	0	0	0	0	NA
Solyc00g079050	Unknown Protein (AHRD V1)	0	0	0	0	0	0	0	0	0	0	0	0	0	0	0	0	0	0	0	0	0	0	0	0	0	0	0	0	NA
Solyc00g080550	Unknown Protein (AHRD V1)	0	0	0	0	0	0	0	0	0	0	0	0	0	0	0	0	0	0	0	0	0	0	0	0	0	0	0	0	ORTHOMCL226	26	0	0	0	0
Solyc00g080750	Unknown Protein (AHRD V1)	4.59	4.36	12.72	12.79	3.6	4.92	0.5	0.1	2.43	1.99	1.13	1.23	1.34	1.25	0.39	0.21	0.45	0.28	0	0	0.91	2.13	0.29	1.31	0.29	0.33	1.86	0.73	ORTHOMCL1498	2	2	2	2	2
Solyc00g082150	Kinesin light chain (AHRD V1 **-- B6SKU4_MAIZE); contains Interpro domain(s) IPR011990 Tetratricopeptide-like helical	42.37	39	34.26	32.42	36.65	38.54	71.26	68.91	70.42	67.05	76.88	63.21	54.94	55.85	69.87	66.22	51.49	51.9	38.62	36.97	62.74	58.49	49.91	47.28	32.15	30.62	31.94	25.91	ORTHOMCL515	4	4	3	4	2
Solyc00g082550	Unknown Protein (AHRD V1)	0	0	0	0	0	1.93	0	0.8	0	0	0	2.22	0	0.19	0	0	0	0	0	0	0	0	0	0	0	0	0	0	NA
Solyc00g084650	Unknown Protein (AHRD V1)	0	0	0	0	0	0	0	0	0	0	0	0	0	0	0	0	0	0	0	0	0	0	0	0	0	0	0	0	NA
Solyc00g084750	Pentatricopeptide repeat-containing protein (AHRD V1 ***- D7LPW5_ARALY); contains Interpro domain(s) IPR002885 Pentatricopeptide repeat	0.48	0.69	0.45	0.81	0.77	0.67	0.81	1.04	0.67	0.81	1.14	1.28	1.22	0.67	1.04	0.98	1.78	0.98	1.63	1.61	2.55	2.93	2.88	3.79	1.45	2.14	2.96	4.76	NA
Solyc00g084760	RNase H family protein (AHRD V1 ***- Q0KIQ6_SOLDE)	0.87	0.76	1.44	1.64	0	0	0.3	0	0	0.35	0.21	0.73	0.86	0.86	0.38	0.95	0.94	0.28	0.11	0.57	0	0	0	0	0	0	0	0	ORTHOMCL21012	1	1	0	0	0
Solyc00g084770	Transposase (AHRD V1 **-- A8WBZ6_CRIPE)	1.15	0.59	1.34	1.72	0	0	0	0.34	0.8	0	0	0	0.33	0.66	0.44	2.19	0.94	0.65	0.26	0.53	0	0	0	0	0	0	0	0	ORTHOMCL6211	1	4	0	0	0
Solyc00g084870	TCP family transcription factor (AHRD V1 *-** A6MCZ2_9ORYZ); contains Interpro domain(s) IPR005333 Transcription factor, TCP	2.38	2.28	3.28	1.78	4.88	3.77	1.25	2.31	2.88	2.71	1.26	1.75	2.89	2.4	1.14	2.64	1.45	1	0.4	0.14	1.84	4.27	0.78	0.67	0.17	0.19	0	0.86	ORTHOMCL9334	2	1	1	1	0
Solyc00g085070	Squalene monooxygenase (AHRD V1 ***- Q506K3_DATIN); contains Interpro domain(s) IPR013698 Squalene epoxidase	96.93	89.91	125.66	118.1	48.56	50.62	42.82	39.84	51.16	51.33	57.97	52.39	43.66	40.73	37.27	39.4	36.48	36.6	55.71	49.14	16.34	14.05	13.5	18.37	19.38	20.06	26.61	30.29	ORTHOMCL827	2	2	3	4	2
Solyc00g085370	Unknown Protein (AHRD V1)	0	0	0	0	0	0	0	0	0	0	0	0	0	0	0	0	0	0	0	0	0	0	0	0	0	0	0	0	NA
Solyc00g085770	Unknown Protein (AHRD V1)	0	0	0	0	0	0	0	0	0	0	0	0	0	0	0	0	0	0	0	0	0	0	0	0	0	0	0	0	NA
Solyc00g085780	Unknown Protein (AHRD V1)	0	0	0	0	0	0	0	0	0	0	0	0	0	0	0	0	0	0	0	0	0	0	0	0	0	0	0	0	NA
Solyc00g088080	Adenine phosphoribosyltransferase (AHRD V1 ***- D7VV81_9FLAO); contains Interpro domain(s) IPR005764 Adenine phosphoribosyl transferase	0	0	0	0	0	0	0	0	0	0	0	0	0	0	0	0	0	0	0	0	0	0	0	0	0	0	0	0	NA
Solyc00g088090	Conserved hypothetical membrane protein (AHRD V1 *--- A9F4Z8_SORC5)	0	0	0	0	0	0	0	0	0	0	0	0	0	0	0	0	0	0	0	0	0	0	0	0	0	0	0	0	NA
Solyc00g088190	Phosphoribosylaminoimidazole carboxylase ATPase subunit (AHRD V1 ***- Q3K4E6_PSEPF); contains Interpro domain(s) IPR003135 ATP-grasp fold, ATP-dependent carboxylate-amine ligase-type	0	0	0	0	0	0	0	0	0	0	0	0	0	0	0	0	0	0	0	0	0	0	0	0	0	0	0	0	NA
Solyc00g088200	Unknown Protein (AHRD V1)	0	0	0	0	0	0	0	0	0	0	0	0	0	0	0	0	0	0	0	0	0	0	0	0	0	0	0	0	NA
Solyc00g088210	Major facilitator superfamily transporter (AHRD V1 ***- D8MMZ0_9ENTR); contains Interpro domain(s) IPR016196 Major facilitator superfamily, general substrate transporter	0	0	0	0	0	0	0	0	0	0	0	0	0	0	0	0	0	0	0	0	0	0	0	0	0	0	0	0	NA
Solyc00g090110	UDP-3-O- (AHRD V1 ***- C6BEH6_RALP1); contains Interpro domain(s) IPR004463 UDP-3-O-acyl N-acetylglucosamine deacetylase	0	0	0	0	0	0	0	0	0	0	0	0	0	0	0	0	0	0	0	0	0	0	0	0	0	0	0	0	NA
Solyc00g090120	Unknown Protein (AHRD V1); contains Interpro domain(s) IPR007922 Protein of unknown function DUF721	0	0	0	0	0	0	0	0	0	0	0	0	0	0	0	0	0	0	0	0	0	0	0	0	0	0	0	0	NA
Solyc00g090130	Protein translocase subunit secA (AHRD V1 ***- C6BEH3_RALP1); contains Interpro domain(s) IPR011115 SecA DEAD-like	0	0	0	0	0	0	0	0	0	0	0	0	0	0	0	0	0	0	0	0	0	0	0	0	0	0	0	0	NA
Solyc00g090430	Os08g0100600 protein (Fragment) (AHRD V1 *-*- Q0J8P7_ORYSJ); contains Interpro domain(s) IPR008507 Protein of unknown function DUF789	0	0.08	0	0	0	0	0	0.38	0	0	0	0.35	0	0.55	0	0	0	0.09	0	0	0	0	0	0	0	0	0	0	NA
Solyc00g090630	Membrane transporter (AHRD V1 *-*- B2WG67_PYRTR); contains Interpro domain(s) IPR016196 Major facilitator superfamily, general substrate transporter	0	0	0	0	0	0	0	0	0	0	0	0	0	0	0	0	0	0	0	0	0	0	0	0	0	0	0	0	NA
Solyc00g090640	Membrane transporter (AHRD V1 *-*- B2WG67_PYRTR)	0	0	0	0	0	0	0	0	0	0	0	0	0	0	0	0	0	0	0	0	0	0	0	0	0	0	0	0	NA
Solyc00g090650	Membrane transporter (AHRD V1 *-*- B2WG67_PYRTR)	0	0	0	0	0	0	0	0	0	0	0	0	0	0	0	0	0	0	0	0	0	0	0	0	0	0	0	0	NA
Solyc00g090660	Unknown Protein (AHRD V1)	0	0	0	0	0	0	0	0	0	0	0	0	0	0	0	0	0	0	0	0	0	0	0	0	0	0	0	0	NA
Solyc00g090860	Nitrate transporter (AHRD V1 ***- O04431_NICPL); contains Interpro domain(s) IPR016196 Major facilitator superfamily, general substrate transporter	0	0	0	0	0	0	77.07	72.13	0	0	0	0	0	0	0	0	0	0	0	0	0	0	0	0	0	0	0	0	NA
Solyc00g090870	5-AMP-activated protein kinase subunit beta-1 (AHRD V1 *-*- C1BJ92_OSMMO); contains Interpro domain(s) IPR006828 5-AMP-activated protein kinase, beta subunit, complex-interacting region	22.68	21.95	23.25	22.47	10.64	11.4	15.66	15.79	12.67	14.9	8.05	7.73	4.62	6.19	6.95	4.03	5.16	4.8	5.1	4.62	11.55	12.07	7.05	8.88	10.25	8.9	1.7	0.35	ORTHOMCL21011	1	1	0	0	0
Solyc00g091170	ATP binding protein (AHRD V1 ***- B6TPV9_MAIZE)	11.64	9.74	7.18	7.46	18.59	14.86	14.04	13.53	19.39	17.76	11.94	12.74	4.99	4.61	4.17	2.91	1.79	1.72	1.41	1.2	4.66	4.22	2.78	4.41	1.62	1.15	32.39	28.54	ORTHOMCL14482	1	1	0	1	0
Solyc00g092870	Unknown Protein (AHRD V1)	0	0	0	0	0	0	0	0	0	0	0	0	0	0	0	0	0	0	0	0	0	0	0	0	0	0	0	0	NA
Solyc00g092880	Unknown Protein (AHRD V1)	0	0	0	0	0	0	0	0	0	0	0	0	0	0	0	0	0	0	0	0	0	0	0	0	0	0	0	0	NA
Solyc00g092890	Unknown Protein (AHRD V1)	0	0	0	0	0	0	0	0	0	0	0	0	0	0	0	0	0	0	0	0	0	0	0	0	0	0	0	0	NA
Solyc00g092900	Unknown Protein (AHRD V1)	0	0	0	0	0	0	0.29	0.38	0	0.11	0	0.35	0.37	0	0.12	0.1	0	0.09	0.07	0.15	0.12	0.13	0.14	0	0	0	0	0	NA
Solyc00g093000	Unknown Protein (AHRD V1)	4.74	4.85	5.51	3.24	6.91	7.04	14.64	12.99	3.76	7.61	14.91	14.98	4.66	6.25	4.17	13.78	6.62	6.09	7.23	6.26	22.1	15.14	10.69	12.14	12.48	12.35	6.61	8.84	NA
Solyc00g093100	Multidrug and toxin extrusion protein 2 (AHRD V1 **-- S47A2_MOUSE); contains Interpro domain(s) IPR015521 MATE family transporter related protein	0	0	0	0	0	0	0	0	0	0	0	0	0	0	0	0	0	0	0	0	0	0	0	0	0	0	0	0	NA
Solyc00g093300	Transposase (Fragment) (AHRD V1 *-*- A8BTK4_VITVI); contains Interpro domain(s) IPR006564 Zinc finger, PMZ-type	0	0.12	0	0	0.13	0	0	0	0	0	0	0	0	0	0	0	0	0	0	0	0.35	0	0	0.25	0	0	0	0	NA
Solyc00g093310	Unknown Protein (AHRD V1)	1.21	0.62	1.06	2.9	0.69	0.35	0.73	1.09	0.84	1.28	0	0	0.69	0.7	1.4	0.77	0.33	0	0	0.28	0.47	0.97	0.53	0	0.35	0	0	0	NA
Solyc00g094010	Virulence VirF2 protein (AHRD V1 **-- Q2K2J5_RHIEC)	0	0	0	0	0	0	0	0	0	0	0	0	0	0	0	0	0	0	0	0	0	0	0	0	0	0	0	0	NA
Solyc00g094020	Replication protein C (AHRD V1 *-*- B9K4F1_AGRVS); contains Interpro domain(s) IPR005090 Replication protein C	0	0	0	0	0	0	0	0	0	0	0	0	0	0	0	0	0	0	0	0	0	0	0	0	0	0	0	0	ORTHOMCL11255	4	0	0	0	0
Solyc00g094520	Unknown Protein (AHRD V1)	0.46	1.88	3.2	0	0	0	2.2	0.55	0	2.58	1.55	0	2.11	1.06	0.71	0.58	0.5	1.03	2.45	1.7	1.43	0.73	0	0	0	0	0	0	ORTHOMCL21010	1	1	0	0	0
Solyc00g094530	NADH-ubiquinone oxidoreductase chain 1 (AHRD V1 ***- Q5M9U6_TOBAC); contains Interpro domain(s) IPR001694 NADH:ubiquinone oxidoreductase, subunit 1	0.44	0	0	0.26	0.25	0	0.26	1.31	1.21	0	2.22	3.55	2.26	1.52	0.34	0.28	0	0.49	0.58	1.21	0.34	0.35	0	0.98	0	0.86	0	0	ORTHOMCL12996	1	1	1	1	0
Solyc00g094540	Unknown Protein (AHRD V1)	0	0	0	0	0	0	0	0.62	0	1.09	0	0.76	0	0	0	0.66	0	0	0	0	0	0	0	0	0	0	0	0	NA
Solyc00g094550	Unknown Protein (AHRD V1)	0	0	0	0	0	0	0	0	0	0	0	0	0	0.42	0	0	0	0	0.32	0	0	0	0	0.41	0	0	0	0	NA
Solyc00g094850	Unknown Protein (AHRD V1)	0	0	0	0	0	0	0	0	0	0	0	0	0	0	0	0	0	0	0	0	0	0	0	0	0	0	0	0	ORTHOMCL73	22	26	0	0	0
Solyc00g095450	Ankyrin repeat-containing protein (AHRD V1 *-*- C5FVI0_NANOT); contains Interpro domain(s) IPR002110 Ankyrin	0	0	0	0	0	0	0	0	0	0	0	0	0	0	0	0	0	0	0	0	0	0	0	0	0	0	0	0	NA
Solyc00g095460	Isoflavone reductase family protein (AHRD V1 ***- B0YDY6_ASPFC); contains Interpro domain(s) IPR016040 NAD(P)-binding domain	0	0	0	0	0	0	0	0	0	0	0	0	0	0	0	0	0	0	0	0	0	0	0	0	0	0	0	0	NA
Solyc00g095760	1-aminocyclopropane-1-carboxylate synthase (AHRD V1 ***- Q96580_SOLLC); contains Interpro domain(s) IPR004839 Aminotransferase, class I and II	0.26	0.7	0.5	0.51	0.48	0.59	15.44	15.83	8.15	8.26	2.02	1.51	0.59	0.59	2.36	1.62	1.02	0.86	1.36	1.57	2.12	1.5	1.64	2	0.29	0.33	2.02	0.49	NA
Solyc00g095860	1-aminocyclopropane-1-carboxylate synthase (AHRD V1 ***- Q96579_SOLLC); contains Interpro domain(s) IPR004839 Aminotransferase, class I and II	4.32	3.51	6.94	8.06	8.78	9.24	31.41	29.84	15.67	15.53	9.89	9.18	4.37	4.98	32.87	34.72	30.87	30.83	43.26	42.26	35.32	36.91	31.84	34.71	5.27	3.14	7.09	3.5	NA
Solyc00g096060	Ectonucleoside triphosphate diphosphohydrolase 6 (AHRD V1 **-- Q6YHK4_CAVPO); contains Interpro domain(s) IPR000407 Nucleoside phosphatase GDA1/CD39	0.84	0.43	0	0	0	0	13.31	10.78	0	0	0	0	0	0	0	0	0	0	0	0	0	0	0	0	0	0	0	0	NA
Solyc00g096460	AT4G08310 protein (Fragment) (AHRD V1 ***- B9DFL6_ARATH)	8.07	8.26	4.47	6.9	8.72	6.21	11.08	9.68	14.39	13.5	8.46	11.91	9.26	7.1	10.07	5.38	11.68	6.05	16.07	13.15	17.32	24.55	26.29	23.69	27.01	29.55	11.26	7.8	NA
Solyc00g097260	Unknown Protein (AHRD V1)	0	0	0	0	0	0	0	0	0	0	0	0	0	0	0	0	0	0	0	0	0	0	0	0	0	0	0	0	ORTHOMCL21009	2	0	0	0	0
Solyc00g097760	Ulp1 protease family C-terminal catalytic domain containing protein (AHRD V1 *-*- Q60D46_SOLDE)	0	0	0	0	0	0	0	0	0	0	0	0	0	0	0	0	0	0	0	0	0	0	0	0	0	0	0	0	ORTHOMCL293	21	1	0	0	0
Solyc00g097960	Unknown Protein (AHRD V1)	6.19	4.75	6.53	4.63	8.12	5.81	3.48	3.02	8.85	4.08	4.92	5.99	2	1.34	3.88	2.71	2.31	1.52	0.52	2.5	4.21	4.94	6.45	3.69	4.68	3.03	6.75	15.99	ORTHOMCL21008	1	1	0	0	0
Solyc00g098560	GDSL esterase/lipase At5g03980 (AHRD V1 **** GDL74_ARATH); contains Interpro domain(s) IPR001087 Lipase, GDSL	9.54	9.24	9.21	10.44	6.21	5.98	24	22.14	16.46	17.11	19.93	21.55	46.8	44.98	18.61	25.03	15.53	17.34	5.96	5.82	26.33	27.71	16.72	16.37	8.65	7.27	2.12	0.44	ORTHOMCL21007	1	1	0	0	0
Solyc00g099160	Unknown Protein (AHRD V1)	0	0	0	0	0	0	0.29	0	0	0	0	0	0	0	0	0	0	0	0	0	0	0	0	0	0	0	0	0	ORTHOMCL13962	3	0	0	0	0
Solyc00g099460	Unknown Protein (AHRD V1)	0	0	0	0	0	0	0	0	0	0	0	0	0	0	0	0	0	0	0	0	0	0	0	0	0	0	0	0	NA
Solyc00g099470	Predicted CDS Pa_2_8820 (AHRD V1 *-*- B2B6U4_PODAN)	0	0	0	0	0	0	0	0	0	0	0	0	0	0	0	0	0	0	0	0	0	0	0	0	0	0	0	0	NA
Solyc00g099570	Oligoendopeptidase F homolog (AHRD V1 ***- Q2W3E3_MAGSA)	0	0	0	0	0	0	0	0	0	0	0	0	0	0	0	0	0	0	0	0	0	0	0	0	0	0	0	0	NA
Solyc00g099580	Gamma-glutamyltranspeptidase (AHRD V1 ***- D4Z6K6_SPHJU); contains Interpro domain(s) IPR000101 Gamma-glutamyltranspeptidase	1.48	1.52	0.72	0.37	2.1	2.28	0	0	1.29	1.13	0.1	0.64	0.07	0.14	0	0	0	0	0	0	0.1	0	0	0	0	0	1.29	0.9	NA
Solyc00g099880	Unknown Protein (AHRD V1)	0	0	0	0	0	0	0	0	0	0	0	0	0	0	0	0	0	0	0	0	0	0	0	0	0	0	0	0	NA
Solyc00g100880	GTP binding protein (AHRD V1 **-- B6TE93_MAIZE); contains Interpro domain(s) IPR007612 Protein of unknown function DUF567	0.1	0.1	0	0	0.11	0	1.37	1.26	0	0	0	0	0	0	0	0	0	0	0	0	0	0	0	0	0.11	0	0	0	ORTHOMCL21006	1	1	0	0	0
Solyc00g101700	Protein kinase (AHRD V1 ***- C4Q4E0_SCHMA); contains Interpro domain(s) IPR002290 Serine/threonine protein kinase	0	0	0	0	0	0	0	0	0	0	0	0	0	0	0	0	0	0	0	0	0	0	0	0	0	0	0	0	NA
Solyc00g102000	Unknown Protein (AHRD V1)	0	0	0	0	0	0	0	0	0	0	0	0	0	0	0	0	0	0	0	0	0	0	0	0	0	0	0	0	NA
Solyc00g102400	Cc-nbs-lrr, resistance protein	0.57	0.4	0.33	0.24	0.32	0.39	9.77	10.33	0.39	0.44	1.34	1.12	1.2	1.34	2.52	2.84	1.35	1.11	0.25	0.26	3.82	4.15	2.87	3.2	2.18	2.32	0.28	0.45	ORTHOMCL29	24	39	0	0	0
Solyc00g104200	Nucleoid occlusion protein (AHRD V1 *--- NOC_BACLD); contains Interpro domain(s) IPR004437 ParB-like partition protein	0	0	0	0	0	0	0	0	0	0	0	0	0	0	0	0	0	0	0	0	0	0	0	0	0	0	0	0	NA
Solyc00g104210	Possible replication protein A (AHRD V1 ***- Q1N8B2_9SPHN)	0	0	0	0	0	0	0	0	0	0	0	0	0	0	0	0	0	0	0	0	0	0	0	0	0	0	0	0	NA
Solyc00g104310	Unknown Protein (AHRD V1)	0	0	0	0	0	0	0	0	0	0	0	0	0	0	0	0	0	0	0	0	0	0	0	0	0	0	0	0	NA
Solyc00g104320	Unknown Protein (AHRD V1)	0	0	0	0	0	0	0	0	0	0	0	0	0	0	0	0	0	0	0	0	0	0	0	0	0	0	0	0	NA
Solyc00g104330	Unknown Protein (AHRD V1)	0	0	0	0	0	0	0	0	0	0	0	0	0	0	0	0	0	0	0	0	0	0	0	0	0	0	0	0	NA
Solyc00g104630	D-xylulose kinase (AHRD V1 **-- D8I0Q8_AMYMU); contains Interpro domain(s) IPR000577 Carbohydrate kinase, FGGY	0	0	0	0	0	0	0	0	0	0	0	0	0	0	0	0	0	0	0	0	0	0	0	0	0	0	0	0	NA
Solyc00g104730	Endopolygalacturonase (Fragment) (AHRD V1 ***- B5UA15_9PEZI); contains Interpro domain(s) IPR000743 Glycoside hydrolase, family 28	0	0	0	0	0	0	0	0	0	0	0	0	0	0	0	0	0	0	0	0	0	0	0	0	0	0	0	0	NA
Solyc00g104740	Essential cytoplasmic protein Ctr86 (AHRD V1 *--- C5JLT4_AJEDS)	0	0	0	0	0	0	0	0	0	0	0	0	0	0	0	0	0	0	0	0	0	0	0	0	0	0	0	0	NA
Solyc00g104940	Bax inhibitor-1 like (AHRD V1 ***- Q8LAY4_ARATH)	0.95	1.56	0	0	0	0	0.23	0	0	0	0	0	0	0	0	0	0	0	0	0	0	0	0	0	0	0	0	0	ORTHOMCL13961	3	0	0	0	0
Solyc00g105340	Genomic DNA chromosome 5 P1 clone MRD20 (AHRD V1 *-*- Q9FH72_ARATH); contains Interpro domain(s) IPR001878 Zinc finger, CCHC-type	0.09	0	0	0	0.1	0	0.11	0	0	0	0	0	0	0	0.14	0	0	0	0	0	0	0	0	0	0	0	0	0	ORTHOMCL89	41	2	0	0	1
Solyc00g105350	Mutator-like transposase-like (AHRD V1 *--- Q9FH11_ARATH); contains Interpro domain(s) IPR004332 Transposase, MuDR, plant	0	0	0	0	0	0	0	0	0	0	0	0	0	0	0	0	0	0	0	0	0	0	0	0	0	0	0	0	ORTHOMCL89	41	2	0	0	1
Solyc00g105750	Mutator-like transposase (AHRD V1 *--- Q94HK4_ORYSA); contains Interpro domain(s) IPR004332 Transposase, MuDR, plant	0.06	0	0	0.07	0	0	0	0	0	0	0	0	0.2	0	0	0	0	0	0	0	0	0	0	0	0	0	0	0	ORTHOMCL122	38	1	0	0	0
Solyc00g106650	BZIP transcription factor family protein expressed (AHRD V1 *--- Q2R8T2_ORYSJ)	9.1	9.7	10.59	13.16	10.32	11.39	25.5	22.74	16.3	20.25	14.77	25.73	18.71	13.14	15.78	10.61	9.88	7.67	11.47	9.12	18.86	16.35	17.29	15.3	17.47	20.26	24.87	19.24	ORTHOMCL13983	2	0	0	0	1
Solyc00g107050	Nuclear transcription factor Y subunit C-1 (AHRD V1 *-*- B6SWV5_MAIZE); contains Interpro domain(s) IPR003958 Transcription factor CBF/NF-Y/archaeal histone	0	0	0	0	0	0	0	0	0.27	0	0	0	0	0.23	0	0	0	0	0	0	0	0	0	0	0	0	0	0	ORTHOMCL4108	5	1	0	0	0
Solyc00g107550	Unknown Protein (AHRD V1)	0	0	0	0	0	0	0	0	0	0	0	0	0	0	0	0	0	0	0	0	0	0	0	0	0	0	0	0	NA
Solyc00g108550	Unknown Protein (AHRD V1)	0	0	0.2	0.42	0	0.2	0	0.21	0	0	0	0.52	0	0.81	0	0.22	0	0	0	0	0	0	0	0	0	0	0	0	NA
Solyc00g109450	Unknown Protein (AHRD V1)	0	0	0	0	0	0	0	0	0	0	0	0	0	0	0	0	0	0	0	0	0	0	0	0	0	0	0	0	NA
Solyc00g109850	Unknown Protein (AHRD V1)	0	0	0	0	0	0	0	0	0	0	0	0	0	0	0	0	0	0	0	0	0	0	0	0	0	0	0	0	NA
Solyc00g109860	Unknown Protein (AHRD V1)	0	0	0	0	0	0	0	0	0	0	0	0	0	0	0	0	0	0	0	0	0	0	0	0	0	0	0	0	NA
Solyc00g110060	Unknown Protein (AHRD V1)	0	0	0	0	0	0	0	0	0	0	0	0	0	0	0	0	0	0	0	0	0	0	0	0	0	0	0	0	NA
Solyc00g110070	C2H2 finger domain-containing protein (AHRD V1 ***- C5JWJ2_AJEDS); contains Interpro domain(s) IPR007087 Zinc finger, C2H2-type	0	0	0	0	0	0	0	0	0	0	0	0	0	0	0	0	0	0	0	0	0	0	0	0	0	0	0	0	NA
Solyc00g110370	Unknown Protein (AHRD V1); contains Interpro domain(s) IPR012287 Homeodomain-related	0	0	0	0	0	0	0	0	0	0	0	0	0	0	1.14	1.89	0	0	0	0	3.07	2.37	6.07	5.54	2.85	1.61	0	0	ORTHOMCL21005	2	0	0	0	0
Solyc00g110870	Receptor like kinase, RLK	8.85	11.51	13.08	12.27	7.77	5.88	64.27	56.95	6.9	7.57	3.87	4.58	3.9	2.64	0.54	0.82	0.19	0.07	0.16	0.11	0.55	0.84	0.21	0.52	0.07	0.23	4.66	11.97	ORTHOMCL2284	2	2	1	2	1
Solyc00g111170	Unknown Protein (AHRD V1); contains Interpro domain(s) IPR013699 Signal recognition particle, SRP72 subunit, RNA-binding	0	0	0	0	0	0	0	0	0	0	0	0	0	0	0	0	0	0	0	0	0	0	0	0	0	0	0	0	ORTHOMCL6212	5	0	0	0	0
Solyc00g111270	Unknown Protein (AHRD V1)	0	0	0	0	0	0	0	0	0	0	0	0	0	0	0	0	0	0	0	0	0	0	0	0	0	0	0	0	NA
Solyc00g111370	Unknown Protein (AHRD V1)	0	0	0	0	0	0	0	0	0	0	0	0	0	0	0	0	0	0	0	0	0	0	0	0	0	0	0	0	NA
Solyc00g111770	Unknown Protein (AHRD V1)	0	0	0	0	0	0	0	0	0	0	0	0	0	0	0	0	0	0	0	0	0	0	0	0	0	0	0	0	ORTHOMCL21004	2	0	0	0	0
Solyc00g111780	Unknown Protein (AHRD V1)	0	0	0	0	0	0	0	0	0	0	0	0	0	0	0	0	0	0	0	0	0	0	0	0	0	0	0	0	ORTHOMCL11253	4	0	0	0	0
Solyc00g112180	Unknown Protein (AHRD V1)	0	0	0	0	0	0	0	0	0	0	0	0	0	0	0	0	0	0	0	0	0	0	0	0	0	0	0	0	ORTHOMCL21003	1	1	0	0	0
Solyc00g112190	Unknown Protein (AHRD V1)	0.14	0.14	0.32	0.33	0.16	0.16	0.08	0	0.1	0	0.35	0.21	0.08	0.08	0	0.09	0	0	0	0	0	0.11	0	0.08	0	0	0	0	ORTHOMCL21002	1	1	0	0	0
Solyc00g112490	Hemagglutinin-related autotransporter protein (AHRD V1 **-- B5SEL8_RALSO); contains Interpro domain(s) IPR008009 Putative Ig	0	0	0	0	0	0	0	0	0	0	0	0	0	0	0	0	0	0	0	0	0	0	0	0	0	0	0	0	NA
Solyc00g112500	Outer membrane autotransporter barrel domain protein (AHRD V1 *-*- B2U759_RALPJ); contains Interpro domain(s) IPR005546 Autotransporter beta-domain	0	0	0	0	0	0	0	0	0	0	0	0	0	0	0	0	0	0	0	0	0	0	0	0	0	0	0	0	NA
Solyc00g112600	Sugar transport protein 2 (AHRD V1 **-- D7KH13_ARALY); contains Interpro domain(s) IPR005828 General substrate transporter	0	0	0	0	0	0	0	0	0	0	0	0	0	0	0	0	0	0	0	0	0	0	0	0	0	0	0	0	NA
Solyc00g112700	Unknown Protein (AHRD V1)	0	0	0	0	0	0	0	0	0	0	0	0	0	0	0	0	0	0	0	0	0	0	0	0	0	0	0	0	NA
Solyc00g112710	Unknown Protein (AHRD V1)	0	0	0	0	0	0	0	0	0	0	0	0	0	0	0	0	0	0	0	0	0	0	0	0	0	0	0	0	NA
Solyc00g112810	V-type H(+)-translocating pyrophosphatase (AHRD V1 ***- Q1GRI8_SPHAL); contains Interpro domain(s) IPR004131 Inorganic H+ pyrophosphatase	0	0	0	0	0	0	0	0	0	0	0	0	0	0	0	0	0	0	0	0	0	0	0	0	0	0	0	0	NA
Solyc00g112820	Unknown Protein (AHRD V1)	0	0	0	0	0	0	0	0	0	0	0	0	0	0	0	0	0	0	0	0	0	0	0	0	0	0	0	0	NA
Solyc00g112830	Short-chain dehydrogenase/reductase SDR (AHRD V1 ***- Q1GWK3_SPHAL); contains Interpro domain(s) IPR002347 Glucose/ribitol dehydrogenase	0	0	0	0	0	0	1.12	1.3	0.22	0	0	0.46	0	0	0.48	0.4	0	0	0	0	0	0	0	0	0	0	0	0	NA
Solyc00g112930	Alpha-N-acetylglucosaminidase (AHRD V1 ***- Q9ZR45_TOBAC); contains Interpro domain(s) IPR007781 Alpha-N-acetylglucosaminidase	0.79	1.07	0	0.31	0.3	0	12.61	15.11	1.82	0.37	1.33	1.16	1.51	0.61	3.24	3.67	0	0	0	0	0.82	1.68	0.46	0.29	0	0	0	0	NA
Solyc00g113230	Unknown Protein (AHRD V1)	0	0	0	0	0	0	0	0	0	0	0	0	0	0	0	0	0	0	0	0	0	0	0	0	0	0	0	0	ORTHOMCL601	15	0	0	0	0
Solyc00g113330	Unknown Protein (AHRD V1)	0	0	0	0	0	0	0	0	0	0	0	0	0	0	0	0	0	0	0	0	0	0	0	0	0	0	0	0	ORTHOMCL601	15	0	0	0	0
Solyc00g113730	Type VI secretion lipoprotein VC_A0113 family (AHRD V1 ***- C6M5G3_NEISI); contains Interpro domain(s) IPR017734 Type VI secretion system, lipoprotein VCA0113	0	0	0	0	0	0	0	0	0	0	0	0	0	0	0	0	0	0	0	0	0	0	0	0	0	0	0	0	NA
Solyc00g113740	Unknown Protein (AHRD V1)	0	0	0	0	0	0	0	0	0	0	0	0	0	0	0	0	0	0	0	0	0	0	0	0	0	0	0	0	NA
Solyc00g113750	ImcF domain protein (AHRD V1 ***- B1FM48_9BURK); contains Interpro domain(s) IPR010623 Protein of unknown function DUF1215	0	0	0	0	0	0	0	0	0	0	0	0	0	0	0	0	0	0	0	0	0	0	0	0	0	0	0	0	NA
Solyc00g114550	At1g32160/F3C3_6 (AHRD V1 ***- Q9FVR1_ARATH); contains Interpro domain(s) IPR008479 Protein of unknown function DUF760	0	0	0	0	0	0	0	0	0	0	0	0	0	0	0	0	0	0	0	0	0	0	0	0	0	0	0	0	ORTHOMCL5804	2	1	1	1	1
Solyc00g116150	Unknown Protein (AHRD V1)	0	0	0	0	0	0	0	0	0	0	0	0	0	0	0	0	0	0	0	0	0	0	0	0	0	0	0	0	ORTHOMCL601	15	0	0	0	0
Solyc00g117450	Short internode related sequence 5 (AHRD V1 **-- D2KC76_BRARP); contains Interpro domain(s) IPR006510 Zinc finger, Lateral Root Primordium type 1	1.18	1.47	1.37	0.63	1.48	1.81	0	0	0.18	0.18	0	0	0	0	0	0	0	0	0	0	0	0	0	0	0	0	0.91	0.95	ORTHOMCL21001	1	1	0	0	0
Solyc00g117650	RabGAP/TBC domain-containing protein (AHRD V1 *-*- D7LD25_ARALY)	0	0	0	0	0	0	0	0	0	0	0	0	0	0	0	0	0	0	0	0	0	0	0	0	0	0	0	0	NA
Solyc00g118680	Unknown Protein (AHRD V1)	0	0	0	0	0	0	0	0	0	0	0	0.27	0	0.42	0	0	0	0.41	0	0	0	0	0	0	0	0	0	0	NA
Solyc00g118690	NADH-ubiquinone oxidoreductase chain 1 (AHRD V1 ***- Q5MA12_TOBAC); contains Interpro domain(s) IPR001694 NADH:ubiquinone oxidoreductase, subunit 1	1.64	0.33	1.52	0.39	0.74	0	2.75	1.96	1.36	2.3	4.43	2.89	2.63	1.51	1.01	2.08	1.77	1.84	2.04	1.51	0	0	0	0.73	0.38	0.43	0	0	NA
Solyc00g120120	Unknown Protein (AHRD V1)	0	0	0	0	0	0	0	0	0	0	0	0	0	0	0	0	0	0	0	0	0	0	0	0	0	0	0	0	NA
Solyc00g120820	L-fucose H+ symporter permease (AHRD V1 ***- D7W1Q0_9FLAO); contains Interpro domain(s) IPR016196 Major facilitator superfamily, general substrate transporter	0	0	0	0	0	0	0	0	0	0	0	0	0	0	0	0	0	0	0	0	0	0	0	0	0	0	0	0	NA
Solyc00g120830	Xylose isomerase domain protein TIM barrel (AHRD V1 ***- A5FCK9_FLAJ1); contains Interpro domain(s) IPR012307 Xylose isomerase-type TIM barrel	0	0	0	0	0	0	0	0	0	0	0	0	0	0	0	0	0	0	0	0	0	0	0	0	0	0	0	0	NA
Solyc00g120930	Calmodulin (AHRD V1 ***- B6UHC3_MAIZE); contains Interpro domain(s) IPR003299 Flagellar calcium-binding protein (calflagin)	0	0	0	0	0	0	0	0	0	0	0	0	0	0	0	0	0	0	0	0	0	0	0	0	0	0	0	0	ORTHOMCL23063	1	0	1	0	0
Solyc00g121230	Cation/multidrug efflux system mebrane-fusion component (AHRD V1 *-*- Q0K5F0_RALEH)	0	0	0	0	0	0	0	0	0	0	0	0	0	0	0	0	0	0	0	0	0	0	0	0	0	0	0	0	NA
Solyc00g121730	&aposchromo&apos domain containing protein (AHRD V1 *--- Q6L3Q3_SOLDE); contains Interpro domain(s) IPR005162 Retrotransposon gag protein	0	0	0	0	0	0	0	0	0	0	0	0	0	0	0	0	0	0	0	0	0	0	0	0	0	0	0	0	ORTHOMCL79	27	6	0	3	11
Solyc00g122530	Calcium/proton antiporter (AHRD V1 ***- D5V937_MORCR); contains Interpro domain(s) IPR004837 Sodium/calcium exchanger membrane region	0	0	0	0	0	0	0	0	0	0	0	0	0	0	0	0	0	0	0	0	0	0	0	0	0	0	0	0	NA
Solyc00g123030	Unknown Protein (AHRD V1)	0	0	0	0	0	0	0	0	0	0	0	0	0	0	0	0	0	0	0	0	0	0	0	0	0	0	0	0	NA
Solyc00g123040	Unknown Protein (AHRD V1)	0	0	0	0	0	0	0	0	0	0	0	0	0	0	0	0	0	0	0	0	0	0	0	0	0	0	0	0	NA
Solyc00g123240	Unknown Protein (AHRD V1)	0	0	0	0	0	0	0	0	0	0	0	0	0	0	0	0	0	0	0	0	0	0	0	0	0	0	0	0	NA
Solyc00g124840	P2 family phage major capsid protein (AHRD V1 ***- A4PE30_9CAUD); contains Interpro domain(s) IPR006441 Phage major capsid protein, P2	0	0	0	0	0	0	0	0	0	0	0	0	0	0	0	0	0	0	0	0	0	0	0	0	0	0	0	0	NA
Solyc00g124850	Phage capsid scaffolding protein (AHRD V1 -**- A4PE29_9CAUD); contains Interpro domain(s) IPR009228 Phage capsid scaffolding	0	0	0	0	0	0	0	0	0	0	0	0	0	0	0	0	0	0	0	0	0	0	0	0	0	0	0	0	NA
Solyc00g124860	Terminase ATPase subunit (AHRD V1 ***- B5F2Y1_SALA4); contains Interpro domain(s) IPR004921 Terminase-like	0	0	0	0	0	0	0	0	0	0	0	0	0	0	0	0	0	0	0	0	0	0	0	0	0	0	0	0	NA
Solyc00g125260	CoA-binding domain protein (AHRD V1 *-*- C5D1E0_VARPS)	0	0	0	0	0	0	0	0	0	0	0	0	0	0	0	0	0	0	0	0	0	0	0	0	0	0	0	0	NA
Solyc00g125270	Intracellular protease PfpI family (AHRD V1 *--- D2M9T3_RHOPA); contains Interpro domain(s) IPR002818 ThiJ/PfpI	0	0	0	0	0	0	0	0	0	0	0	0	0	0	0	0	0	0	0	0	0	0	0	0	0	0	0	0	NA
Solyc00g125580	Ulp1 protease family C-terminal catalytic domain containing protein (AHRD V1 ***- Q60D46_SOLDE); contains Interpro domain(s) IPR003653 Peptidase C48, SUMO/Sentrin/Ubl1	0	0.13	0	0	0	0.15	0.16	0	0	0	0	0.19	0	0	0.2	0	0	0	0	0	0	0	0	0.15	0	0	0	0	ORTHOMCL150	35	0	0	0	0
Solyc00g125980	NADH-ubiquinone oxidoreductase chain 2 (AHRD V1 ***- NU2M_BETVU)	0.84	2.14	0.97	2	0	0.97	13.06	7.52	1.16	1.18	10.63	8.64	10.08	11.11	12.89	6.92	11.35	10.82	9.3	6.96	5.85	4.68	7.33	4.22	0.96	2.18	0	0	ORTHOMCL21000	2	0	0	0	0
Solyc00g125990	NADH-quinone oxidoreductase subunit N (AHRD V1 ***- B1LUM3_METRJ); contains Interpro domain(s) IPR001750 NADH:ubiquinone/plastoquinone oxidoreductase	1.19	0.41	1.23	1.9	0.45	0.61	1.43	1.9	1.28	1.12	3.36	2.54	4.25	4.89	1.02	1.18	1.87	0.89	1.65	1.71	1.85	1.27	1.39	0.89	0.61	0.34	0	0	ORTHOMCL9732	2	1	1	1	0
Solyc00g126000	NADH-ubiquinone oxidoreductase chain 2 (AHRD V1 ***- NU2M_BETVU)	2.23	4.57	6.49	9.35	5.06	5.15	22.77	21.4	14.69	13.32	7.56	6.58	7.68	7.08	12.89	22.7	23	19.44	14.88	15.47	2.6	0.89	0.98	1.87	0.64	1.45	0.78	0	ORTHOMCL20999	1	1	0	0	0
Solyc00g126010	Uncharacterized mitochondrial protein AtMg01330 (AHRD V1 ***- M1330_ARATH)	2.45	1.51	6.84	4.7	3.89	5.66	26.5	27.64	6.12	6.89	4.15	9.4	6.75	5.1	17.38	18.09	22.89	18.19	11.34	11.33	3.81	2.35	0	3.85	0	0.64	0	0	ORTHOMCL20998	1	1	0	0	0
Solyc00g126420	Unknown Protein (AHRD V1)	0	0	0	0	0	0	0	0	0	0	0	0	0	0	0	0	0	0	0	0	0	0	0	0	0	0	0	0	NA
Solyc00g126430	Methylthioadenosine phosphorylase (AHRD V1 ***- B9NPM0_9RHOB); contains Interpro domain(s) IPR010044 Methylthioadenosine phosphorylase	0	0	0	0	0	0	0	0	0	0	0	0	0	0	0	0	0	0	0	0	0	0	0	0	0	0	0	0	NA
Solyc00g126440	Unknown Protein (AHRD V1)	0	0	0	0	0	0	0	0	0	0	0	0	0	0	0	0	0	0	0	0	0	0	0	0	0	0	0	0	NA
Solyc00g127540	Ribonucleoside-diphosphate reductase (AHRD V1 ***- Q46X33_RALEJ)	0	0	0	0	0	0	0	0	0	0	0	0	0	0	0	0	0	0	0	0	0	0	0	0	0	0	0	0	NA
Solyc00g127550	Ribonucleoside-diphosphate reductase (AHRD V1 ***- Q1LIR6_RALME); contains Interpro domain(s) IPR000788 Ribonucleotide reductase large subunit, C-terminal	0	0	0	0	0	0	0	0	0	0	0	0	0	0	0	0	0	0	0	0	0	0	0	0	0	0	0	0	NA
Solyc00g127560	Ribonucleoside-diphosphate reductase (AHRD V1 **** Q1LIR6_RALME); contains Interpro domain(s) IPR000788 Ribonucleotide reductase large subunit, C-terminal	0	0	0	0	0	0	0	0	0	0	0	0	0	0	0	0	0	0	0	0	0	0	0	0	0	0	0	0	NA
Solyc00g127660	Unknown Protein (AHRD V1)	47.98	47.79	39.96	36	28	26.87	48.09	42.9	31.38	30.04	30.03	22.65	25.98	23.39	31.71	29.8	32.65	29.9	29.71	30	37.39	35.39	31.93	38.67	28.27	34.04	15.02	10.33	NA
Solyc00g127670	Membrane protein (AHRD V1 ***- B6TDF9_MAIZE)	7.34	9.52	4.16	7.07	12.98	15.49	3.22	4.29	8.43	6.79	5.45	7.12	4.11	3.1	6.06	6.6	4.08	5.03	2.86	0.99	6.95	6.86	8.16	4.81	2.89	0.93	16.47	31.12	ORTHOMCL10546	1	1	1	1	1
Solyc00g127870	Phosphatidylinositol N-acetylglucosaminyltransferase subunit P (AHRD V1 ***- B6TUG3_MAIZE); contains Interpro domain(s) IPR013717 PIG-P	92.4	88.54	29.29	26.14	12.31	13.78	20.35	21.32	17.7	18.45	9.3	11.09	4.11	4.68	9.56	10.17	3.37	2.68	2.23	1.77	6.68	5.15	3.77	4.95	2.61	1.87	24.64	33.91	ORTHOMCL3519	1	2	1	2	1
Solyc00g128870	Nudix hydrolase 1 (AHRD V1 ***- A6ANR4_VIBHA); contains Interpro domain(s) IPR000086 NUDIX hydrolase domain	44.38	43.66	65.33	56.5	21.23	21.88	52.45	55.37	62.45	60.92	26.33	27.28	42.19	36.03	34.97	33.34	32.51	28.06	20.29	19.09	20.81	21.56	19.1	17.93	13.33	16.41	2.69	7.4	ORTHOMCL10035	1	2	1	1	0
Solyc00g129670	Unknown Protein (AHRD V1)	0	0	0	0	0	0	0	0	0	0	0	0	0	0	0	0	0	0	0	0	0	0	0	0	0	0	0	0	NA
Solyc00g129680	Unknown Protein (AHRD V1)	0	0	0	0	0	0	0	0	0	0	0	0	0	0	0	0	0	0	0	0	0	0	0	0	0	0	0	0	NA
Solyc00g129880	Unknown Protein (AHRD V1)	0	0	0	0	0	0	0	0	0	0	0	0	0	0	0	0	0	0	0	0	0	0	0	0	0	0	0	0	NA
Solyc00g129980	Unknown Protein (AHRD V1)	0	0	0	0	0	0	0	0	0	0	0	0	0	0	0	0	0	0	0	0	0	0	0	0	0	0	0	0	NA
Solyc00g130180	Hypothetical membrane spanning protein (AHRD V1 **-- Q0K8K0_RALEH); contains Interpro domain(s) IPR003741 Protein of unknown function DUF162	0	0	0	0	0	0	0	0	0	0	0	0	0	0	0	0	0	0	0	0	0	0	0	0	0	0	0	0	NA
Solyc00g130190	Nicotinate phosphoribosyltransferase (AHRD V1 *-*- Q46YY6_RALEJ); contains Interpro domain(s) IPR007229 Nicotinate phosphoribosyltransferase-related	0	0	0	0	0	0	0	0	0	0	0	0	0	0	0	0	0	0	0	0	0	0	0	0	0	0	0	0	NA
Solyc00g130290	Urea ABC transporter permease protein UrtB (AHRD V1 ***- D5NHV3_9BURK); contains Interpro domain(s) IPR017779 ABC transporter, urea, permease protein, UrtB	0	0	0	0	0	0	0	0	0	0	0	0	0	0	0	0	0	0	0	0	0	0	0	0	0	0	0	0	NA
Solyc00g130690	Membrane protein involved in aromatic hydrocarbon degradation (AHRD V1 **-- C6Y1W8_PEDHD)	0	0	0	0	0	0	0	0	0	0	0	0	0	0	0	0	0	0	0	0	0	0	0	0	0	0	0	0	NA
Solyc00g130700	Unknown Protein (AHRD V1)	0	0	0	0	0	0	0	0	0	0	0	0	0	0	0	0	0	0	0	0	0	0	0	0	0	0	0	0	NA
Solyc00g130800	Peptidase C14 caspase catalytic subunit p20 (AHRD V1 ***- A0LDB9_MAGSM); contains Interpro domain(s) IPR011600 Peptidase C14, caspase catalytic	0	0	0	0	0	0	0	0	0	0	0	0	0	0	0	0	0	0	0	0	0	0	0	0	0	0	0	0	NA
Solyc00g130810	Cationic outer membrane protein OmpH (AHRD V1 ***- A3HY36_9BACT); contains Interpro domain(s) IPR005632 Outer membrane chaperone Skp (OmpH)	0	0	0	0	0	0	0	0	0	0	0	0	0	0	0	0	0	0	0	0	0	0	0	0	0	0	0	0	NA
Solyc00g131610	Disease resistance response (AHRD V1 ***- D7KM73_ARALY); contains Interpro domain(s) IPR004265 Plant disease resistance response protein	0	0	0	0	0	0	0	0	0	0	0	0	0	0	0	0	0	0	0	0	0	0	0	0	0	0	0	0	ORTHOMCL11252	4	0	0	0	0
Solyc00g131710	Pol polyprotein (AHRD V1 *-*- POL_MLVFP); contains Interpro domain(s) IPR001584 Integrase, catalytic core	0	0	0	0	0	0	0	0	0	0	0	0	0	0	0	0	0	0	0	0	0	0	0	0	0	0	0	0	ORTHOMCL79	27	6	0	3	11
Solyc00g133110	Peptidase M14 carboxypeptidase A (AHRD V1 *-*- B4SIH8_STRM5)	0	0	0	0	0	0	0	0	0	0	0	0	0	0	0	0	0	0	0	0	0	0	0	0	0	0	0	0	NA
Solyc00g133710	Unknown Protein (AHRD V1)	0	0	0	0	0	0	0	0	0	0	0	0	0	0	0	0	0	0	0	0	0	0	0	0	0	0	0	0	NA
Solyc00g133720	Unknown Protein (AHRD V1)	0	0	0	0	0	0	0	0	0	0	0	0	0	0	0	0	0	0	0	0	0	0	0	0	0	0	0	0	NA
Solyc00g134620	Transferase family protein (AHRD V1 **-* D7KID7_ARALY); contains Interpro domain(s) IPR003480 Transferase	0	0	0	0	0	0	10.35	6.89	0	0	0	0	0	0	0	0	0	0	0	0	0	0	0	0	0	0	0	0	NA
Solyc00g134820	Type IV prepilin leader peptidase (AHRD V1 ***- B9CJS1_9BURK); contains Interpro domain(s) IPR010627 Peptidase A24A, N-terminal	0	0	0	0	0	0	0	0	0	0	0	0	0	0	0	0	0	0	0	0	0	0	0	0	0	0	0	0	NA
Solyc00g134830	Dephospho-CoA kinase (AHRD V1 *-*- Q1LIP3_RALME); contains Interpro domain(s) IPR009777 Protein of unknown function DUF1342	0	0	0	0	0	0	0	0	0	0	0	0	0	0	0	0	0	0	0	0	0	0	0	0	0	0	0	0	NA
Solyc00g134840	Oligopeptide transporter OPT family (AHRD V1 ***- C6BH59_RALP1); contains Interpro domain(s) IPR004813 Oligopeptide transporter OPT superfamily	0	0	0	0	0	0	0	0	0	0	0	0	0	0	0	0	0	0	0	0	0	0	0	0	0	0	0	0	NA
Solyc00g135040	Transcriptional regulator ArsR family (AHRD V1 *-*- D7I5V9_PSESS); contains Interpro domain(s) IPR001845 Bacterial regulatory protein, ArsR	0	0	0	0	0	0	0	0	0	0	0	0	0	0	0	0	0	0	0	0	0	0	0	0	0	0	0	0	NA
Solyc00g135050	Transcriptional regulator LysR family (AHRD V1 ***- Q4KIS4_PSEF5); contains Interpro domain(s) IPR000847 Bacterial regulatory protein, LysR	0	0	0	0	0	0	0	0	0	0	0	0	0	0	0	0	0	0	0	0	0	0	0	0	0	0	0	0	NA
Solyc00g135060	Zinc-binding alcohol dehydrogenase (AHRD V1 ***- D7I5W1_PSESS); contains Interpro domain(s) IPR014182 Alcohol dehydrogenase, zinc-binding type 1	0	0	0	0	0	0	0	0	0	0	0	0	0	0	0	0	0	0	0	0	0	0	0	0	0	0	0	0	NA
Solyc00g135260	Transferase family protein (AHRD V1 **** D7KID7_ARALY); contains Interpro domain(s) IPR003480 Transferase	0	0	0	0	0	0	9.88	7.67	0	0	0	0	0	0	0	0	0	0	0	0	0	0	0	0	0	0	0	0	NA
Solyc00g136260	Ring H2 finger protein (AHRD V1 *-*- D9ZHD8_HYPPE); contains Interpro domain(s) IPR018957 Zinc finger, C3HC4 RING-type	8.1	4.89	10.14	9.19	10.59	9.35	3.24	2.74	14.68	11.09	46.76	41.03	65.75	57.29	30.71	32.21	14.65	17.27	2.4	1.73	232.61	165.44	26.94	34.66	8.85	8.39	6.08	5.72	ORTHOMCL11993	1	1	1	1	0
Solyc00g136560	Undecaprenyl pyrophosphate synthase (AHRD V1 *-*- D8G636_9CYAN); contains Interpro domain(s) IPR001441 Di-trans-poly-cis-decaprenylcistransferase-like	11.54	11.94	63.05	61.02	14.3	18.59	0.16	0	0	0.57	1.59	0.99	1.54	0.93	1.03	2.05	9.17	8.9	2.75	3.22	2.08	3.21	20.94	21.5	75.89	77.98	6.93	4.08	NA
Solyc00g138060	2-oxoglutarate-dependent dioxygenase (AHRD V1 **** B9GL08_POPTR); contains Interpro domain(s) IPR005123 Oxoglutarate and iron-dependent oxygenase	0.45	0.31	0	0	0.42	0.09	1.97	2.15	0	0	0	0	0	0	0	0	0	0	0	0	0	0	0	0	0	0	7.18	4.87	ORTHOMCL20997	1	1	0	0	0
Solyc00g139760	Filamentous hemagglutinin family outer membrane protein (AHRD V1 **-- C6BQ18_RALP1); contains Interpro domain(s) IPR012334 Pectin lyase fold	0	0	0	0	0	0	0	0	0	0	0	0	0	0	0	0	0	0	0	0	0	0	0	0	0	0	0	0	NA
Solyc00g140060	Tripeptidyl peptidase II (AHRD V1 ***- Q5VZU9_HUMAN); contains Interpro domain(s) IPR015500 Peptidase S8, subtilisin-related	20.57	19.46	13.63	14.77	32.64	32.89	52.46	42.16	44.89	40.17	51.89	50.04	81.75	84.98	55.6	52.95	39.61	37.91	39.87	42.2	38.82	52.37	29.03	31.79	23.57	23.98	39.88	47.54	ORTHOMCL20996	1	1	0	0	0
Solyc00g141360	Lrr, resistance protein fragment	0	0	0	0	0.14	0	1.48	1.19	0.17	0.35	1.68	0.18	0.28	0.14	0.19	0.16	0	0	0	0	0	0	0	0	0	0	0	0	NA
Solyc00g141560	Unknown Protein (AHRD V1); contains Interpro domain(s) IPR016027 Nucleic acid-binding, OB-fold-like	0	0	0	0	0	0.21	0	0	0	0	0	0	0	0	0	0	0	0	0.16	0	0	0	0	0	0.21	0.24	0	0	ORTHOMCL1053	5	6	0	0	0
Solyc00g142160	Unknown Protein (AHRD V1)	0	0	0.31	0.32	0.3	0	0.97	0.64	0	0.38	0	2.37	0	0.31	0	0.34	1.17	1.51	2.15	0.74	0	0.43	0	0.3	0.31	0.35	0	0	NA
Solyc00g142170	RNA-dependent RNA polymerase (AHRD V1 *-*- Q18L78_9VIRU); contains Interpro domain(s) IPR008686 RNA-dependent RNA polymerase, mitoviral	0	0	0	0.1	0	0	0.59	0.39	0.45	0.11	1.11	0.24	0.37	0.28	0.63	0.62	1.51	2.11	0.8	0.83	0.13	0.39	0	0.09	0.28	0.21	0	0.12	ORTHOMCL13960	1	2	0	0	0
Solyc00g143770	Unknown Protein (AHRD V1)	10.58	9.7	7.21	10.48	11.58	8.42	17.95	20.55	12.13	12.3	11.73	9.68	9.21	8.42	18.54	24.58	19.79	26.65	20.44	25.28	15.3	11.06	14.71	17.16	13.86	15.21	15.77	12.16	NA
Solyc00g144470	Serine/threonine-protein phosphatase 7 long form homolog (AHRD V1 **-- PPP7L_ARATH); contains Interpro domain(s) IPR019557 Aminotransferase-like, plant mobile domain	0	0	0	0	0	0	1.11	1.22	0.38	0.39	0.47	0.48	0	0.05	0	0	0.05	0.05	3.49	2.65	0	0	0	0.05	29.73	26.84	0	0	ORTHOMCL1617	7	2	0	0	0
Solyc00g145170	Proteinase inhibitor II (AHRD V1 ***- Q3S483_SOLTU); contains Interpro domain(s) IPR003465 Proteinase inhibitor I20, Pin2	26.46	25.44	0	0.24	0	0	37.97	39.11	4.41	5.87	34.02	27.28	50.67	53.5	7.05	10.62	0	0	0	0	210.49	209.32	36.97	51.7	3.67	4.67	0	0	ORTHOMCL13959	3	0	0	0	0
Solyc00g147570	Gelsolin (Fragment) (AHRD V1 **-- C0PU67_SALSA); contains Interpro domain(s) IPR007122 Gelsolin	1.68	1.29	0	0.3	0	0	0	0	0	0	0	0	0.1	0	0	0	0	0	0	0	0	0	0	0	0	0	0	0	NA
Solyc00g147770	HAT family dimerisation domain containing protein (AHRD V1 ***- Q2QPA8_ORYSJ); contains Interpro domain(s) IPR008906 HAT dimerisation	1.44	1.18	1.09	1.3	1.15	0.75	2.08	2.16	0.8	1.32	0.98	0.75	0.75	1	0.89	1.74	0.86	0.65	1.09	0.87	2.24	1.04	1.39	0.89	1.83	1.32	0.6	0.73	ORTHOMCL93	14	1	1	27	0
Solyc00g149970	Pho1-like protein (AHRD V1 ***- B9HKS4_POPTR); contains Interpro domain(s) IPR004331 SPX, N-terminal	1.89	2.38	3.04	2.78	1.81	2.18	172.67	163.21	2.21	1.84	4.42	4.71	3.5	3.52	2.01	2.95	0.63	0.33	0.39	0.13	7.44	7.88	4.84	4.88	2.17	0.76	4.05	3.79	NA
Solyc00g153680	Serine/threonine protein kinase (AHRD V1 *-*- D0NNA3_PHYIN); contains Interpro domain(s) IPR002290 Serine/threonine protein kinase	0.6	0.73	0.55	0	0.13	0	0	0	0.49	0.17	0.4	0.18	0.41	1.51	0.55	0.91	0.13	0.54	0.11	0.11	0	0	0	0	0	0	0	0	NA
Solyc00g153980	Unknown Protein (AHRD V1)	0	0	0	0	0.58	0	0	0	0	0	0	0	0	0	0	0	0	0	0	0	0	0	0	0.57	0	0	0	0	NA
Solyc00g154480	Cellulose synthase-like protein E1 (AHRD V1 *-*- CSLE1_ARATH); contains Interpro domain(s) IPR005630 Terpene synthase, metal-binding domain	0	0	0	0	0.19	0.19	0	0.07	0	0	0	0	0	0	0	0	0	0	0	0	0	0	0	0	0	0	0	0.16	ORTHOMCL1646	3	3	0	3	0
Solyc00g154980	Ethylene insensitive 3 class transcription factor (AHRD V1 **** D5L144_MALDO); contains Interpro domain(s) IPR006957 Ethylene insensitive 3	0	0	0	0	0	0	0	0	0	0	0	0	0	0	0	0	0	0	0	0	0	0	0	0	0	0	0	0	ORTHOMCL20995	1	1	0	0	0
Solyc00g156980	Choline dehydrogenase (AHRD V1 **-- A5L8M4_9GAMM); contains Interpro domain(s) IPR008671 Lycopene beta and epsilon cyclase	12.24	14.59	4.57	4.43	9.93	5.58	0.67	0.67	13.39	15.31	17.3	16.56	9.4	8.56	1.38	1.29	0	0	0.3	0	0.35	0.18	0.2	0.25	0	0.15	10.65	22.3	NA
Solyc00g157080	Pto kinase interactor-like protein (AHRD V1 *-*- Q9LXA4_ARATH)	9.32	7.86	15.21	15.46	1.67	2.45	0	0	0	0	0	0	0.19	0.19	0	0	0	0	0	0	0	0	0	0	0	0	0.91	0	NA
Solyc00g157180	cDNA clone J033046E14 full insert sequence (AHRD V1 *--- B7EM90_ORYSJ)	0.15	0.46	1.14	0.81	0	0	0.18	0.18	0.21	0	0	0.22	0.17	0.09	0.23	0.19	0.25	0.25	0.07	0.21	0.47	0	0	0.08	0.09	0	0	0	NA
Solyc00g160780	Unknown Protein (AHRD V1)	10.48	9.16	0.98	1.01	4.41	3.9	1.01	0.41	5.86	7.36	4.58	1.74	1.36	1.17	0.26	1.07	0	0	0	0	0	0	0	0	0	0	3.06	5.63	ORTHOMCL11545	2	1	0	1	0
Solyc00g163580	O-methyltransferase (AHRD V1 ***- A5HK00_VITVI); contains Interpro domain(s) IPR001077 O-methyltransferase, family 2	0	0.3	0	0	0.67	0.34	0	0	0	0	0	0	0	0	0	0	0	0	0	0	0	0	0	0	0	0	0	0	NA
Solyc00g164580	Unknown Protein (AHRD V1)	0	0	0	0	0	0	0	0	0	0	0	0	0	0.18	0	0	0	0.18	0.57	0.59	0	0	0	0	0.18	0	0	0	NA
Solyc00g164680	ABC transporter G family member 11 (AHRD V1 ***- AB11G_ARATH); contains Interpro domain(s) IPR013525 ABC-2 type transporter	8.92	9.25	25.67	25.66	9.33	8.36	6.05	6.74	6.1	5.94	10.6	8.46	11.7	11.97	9.37	8.91	21.06	18.63	29.79	27.96	21.15	21.55	25.8	26.22	18.82	18.34	7.52	9.57	ORTHOMCL105	9	10	4	10	9
Solyc00g165080	Unknown Protein (AHRD V1)	0	0	0	0	0	0	0	0	0	0	0	0	0	0	0	0	0	0	0	0	0	0	0	0	0	0	0	0	NA
Solyc00g165090	Unknown Protein (AHRD V1)	0	0	0	0	0	0	0	0	0	0	0	0	0	0	0	0	0	0	0	0	0	0	0	0	0	0	0	0	NA
Solyc00g165190	Unknown Protein (AHRD V1)	0	0	0	0	0	0	0	0	0	0	0	0	0	0	0	0	0	0	0	0	0	0	0	0	0	0	0	0	ORTHOMCL20994	1	1	0	0	0
Solyc00g166190	Unknown Protein (AHRD V1)	0	0	0	0	0	0	0	0	0	0	0	0	0	0	0	0	0	0	0	0	0	0	0	0	0	0	0	0	NA
Solyc00g166490	Ulp1 protease family C-terminal catalytic domain containing protein (AHRD V1 *-*- Q60D46_SOLDE)	1.06	1.16	0.35	0.09	0.17	0.09	0	0	0	0.11	0	0	0	0	0.12	0.29	0	0	0.34	0.28	0	0	0	0	0	0	0	0	ORTHOMCL134	36	1	0	0	0
Solyc00g166690	Unknown Protein (AHRD V1)	0	0	0	0	0	0	0	0	0	0	0	0	0	0	0	0	0	0	0	0.13	0	0	0	0	0	0	0	0	NA
Solyc00g167290	Single-stranded-DNA-specific exonuclease RecJ (AHRD V1 ***- A1ZYM3_9BACT); contains Interpro domain(s) IPR003156 Phosphoesterase, DHHA1	0	0	0	0	0	0	0	0	0	0	0	0	0	0	0	0	0	0	0	0	0	0	0	0	0	0	0	0	NA
Solyc00g167300	GH3 auxin-responsive promoter (AHRD V1 ***- C6XU83_PEDHD)	0	0	0	0	0	0	0	0	0	0	0	0	0	0	0	0	0	0	0	0	0	0	0	0	0	0	0	0	NA
Solyc00g167800	Unknown Protein (AHRD V1)	0	0	0	0	0	0	0	0	0	0	0	0	0	0	0	0	0	0	0	0	0	0	0	0	0	0	0	0	NA
Solyc00g168200	Unknown Protein (AHRD V1)	6.19	6.33	5.75	2.96	7.01	10	11.88	2.97	12	3.48	14.66	3.65	15.61	12.85	1.91	1.57	1.34	4.17	3.3	1.14	30.75	11.85	6.51	9.7	2.85	0	1.73	0	NA
Solyc00g170200	Hydrolase alpha/beta fold family protein (AHRD V1 ***- D7L528_ARALY)	50.9	47.98	36.96	40.69	227.26	222.74	26.95	22.11	3.39	2.19	0.75	1.97	0.51	0.51	0.34	0.28	0	0.5	0	0	0	0	0	0	0.26	0	189.43	159.14	ORTHOMCL20993	1	1	0	0	0
Solyc00g170210	Unknown Protein (AHRD V1)	11.49	9.03	6.68	7.86	3.26	5.69	12.81	13.53	13.65	15.57	18.06	15.43	16.48	15.63	14.86	10.96	10.91	11.07	13.69	15.17	56.42	54.38	67.98	49.64	68.29	67.36	12.31	12.79	NA
Solyc00g170510	Pectinesterase (AHRD V1 **** B7SIX2_9CONI); contains Interpro domain(s) IPR000070 Pectinesterase, catalytic	0	0	0	0	0	0	0	0	0.41	0.41	0	0	0	0	0	0	0	0	0.09	0	0	0	0	0	0	0	0	0	ORTHOMCL13958	2	1	0	0	0
Solyc00g171710	Unknown Protein (AHRD V1); contains Interpro domain(s) IPR017451 F-box associated type 1	57.92	51.2	4.2	4.21	0.11	0	0	0.22	0	0.13	0	0	0	0	0.14	0.12	0	0	0	0	0	0	0	0	0	0	0	0	ORTHOMCL13957	1	2	0	0	0
Solyc00g171810	ATP synthase subunit a (AHRD V1 ***- Q45KQ5_CAPAN); contains Interpro domain(s) IPR000568 ATPase, F0 complex, subunit A	1.01	1.29	2.71	2.87	0.57	0.07	1.21	1.89	1.4	0.97	6.19	3.81	7.01	6.98	2.43	2.89	2.74	1.77	1.85	1.46	10.09	7.55	5.19	5.44	3.05	2.79	0.88	0	ORTHOMCL9728	2	1	1	1	0
Solyc00g172410	DNA binding protein-like (AHRD V1 *--- Q6Z4I5_ORYSJ); contains Interpro domain(s) IPR012340 Nucleic acid-binding, OB-fold	0	0	0	0	0	0	0	0	0	0	0	0	0	0	0	0	0	0	0.07	0.07	0	0	0	0	0	0	0	0	ORTHOMCL135	20	0	0	0	17
Solyc00g173430	Nucleic acid binding protein (AHRD V1 **-- B6TJ76_MAIZE)	0	0	0	0	0	0	0	0	0	0	0	0	0	0	0	0	0	0	0	0	0	0	0	0	0	0	0	0	NA
Solyc00g174330	Pathogenesis related protein PR-1 (AHRD V1 ***- Q9SC15_SOLTU); contains Interpro domain(s) IPR001283 Allergen V5/Tpx-1 related	12.48	12.38	79.75	78.2	10.04	11.33	18.87	15.3	37.49	35.74	25	19.81	21.2	24.85	102.72	95.92	5.17	5.25	10.67	10.12	0.3	0.91	0.67	1.17	0.44	0.5	0.27	0.83	NA
Solyc00g174340	Pathogenesis-related protein 1b (AHRD V1 ***- Q941G6_SOLTU); contains Interpro domain(s) IPR018244 Allergen V5/Tpx-1 related, conserved site	67.93	55.48	376.11	383.43	46.16	43.32	80.68	79.51	145.4	133.66	87.61	70.01	84.86	77.58	593.06	579.68	28.36	32.58	58.83	56.37	1.66	6.25	3.43	6.97	4.1	2.32	2.48	3.61	ORTHOMCL6210	2	3	0	0	0
Solyc00g175240	Ulp1 protease family C-terminal catalytic domain containing protein (AHRD V1 *-*- Q60D46_SOLDE); contains Interpro domain(s) IPR003653 Peptidase C48, SUMO/Sentrin/Ubl1	0	0	0.21	0	0.2	0	0	0	0	0	0	0	0	0	0	0	0	0	0	0	0	0	0	0	0	0	0	0	ORTHOMCL150	35	0	0	0	0
Solyc00g178340	Branched-chain-amino-acid aminotransferase (AHRD V1 ***- Q94CF8_CAPAN); contains Interpro domain(s) IPR005786 Branched-chain amino acid aminotransferase II	0	0.29	0	0	0	0	5.52	5.02	0	0	0	0	0	0	0	0	0	0.16	0	0	0.43	0	0	0.16	0	0	0	0	NA
Solyc00g179240	MADS-box transcription factor (AHRD V1 ***- Q1EMR8_PLAMJ); contains Interpro domain(s) IPR002100 Transcription factor, MADS-box	4.66	5.82	2.41	0	31.08	35.83	23.59	39.07	0.72	0	0	0	0	0	0	0	0	0	0	0	0	0	0	0	0	0	13.71	14.24	NA
Solyc00g179640	Unknown Protein (AHRD V1)	6.32	5.26	8.27	6.15	12.09	10.04	32.73	30.31	23	13.32	18.06	22.14	98.37	99.43	12.17	14.07	15.44	14.66	13.71	16.07	0.61	0	0	0	0.46	0	0	0	ORTHOMCL4112	6	0	0	0	0
Solyc00g179840	Unknown Protein (AHRD V1)	0	0	0	0	0	0	0	0	0	0	0	0	0	0	0	0	0	0	0	0	0	0	0	0	0	0	0	0	NA
Solyc00g180440	50S ribosomal protein L20 chloroplastic (AHRD V1 ***- D3WBC1_9BORA); contains Interpro domain(s) IPR005813 Ribosomal protein L20	0	0	0	0.4	0	0	0	0	0	0	0.57	0	0	0	0	0	0	0	0	0	0	0	0	0	0	0	0	0	ORTHOMCL11251	4	0	0	0	0
Solyc00g180840	Unknown Protein (AHRD V1)	1.22	1.37	0	0.15	0	0	0.29	0.44	0.17	0.17	0	0.36	0.42	0.28	0.19	0.46	0.13	0.14	0.11	0.11	0	0	0.21	0	0	0	0	0	ORTHOMCL6209	5	0	0	0	0
Solyc00g181240	Unknown Protein (AHRD V1)	0	0	0	0	0	0	0	0	0	0	0.8	0	0	0	0	0	0	0	0	0.44	0	0	0	0	0	0	0	0	ORTHOMCL20990	1	1	0	0	0
Solyc00g181250	Unknown Protein (AHRD V1)	0	0	0	0	0	0	0	0	0	0	0	0.16	0	0	0	0	0.12	0	0.1	0	0	0	0	0	0	0	0	0	ORTHOMCL20989	1	1	0	0	0
Solyc00g183050	FYVE zinc finger containing protein (AHRD V1 **-- Q6ASX1_ORYSJ)	0.71	1.46	0.83	1.7	0.81	0	0.85	0	0	2	0	3.15	4.08	2.46	5.48	0.9	3.86	2.4	1.27	2.63	2.21	2.27	1.25	2.39	1.64	6.49	0	5.15	ORTHOMCL20988	1	1	0	0	0
Solyc00g183550	Unknown Protein (AHRD V1)	0	0	0	0	0	0	0	0	0	0	0	0	0	0	0	0	0	0	0	0	0	0	0	0	0	0	0	0	NA
Solyc00g184350	Genomic DNA chromosome 5 P1 clone MJJ3 (AHRD V1 ***- Q9FFK6_ARATH)	5.54	5.04	9.07	7.37	5.58	6.63	15.02	17.71	9.1	9.22	10.77	8.77	11.3	9	12.96	13.04	17.59	17.06	13.69	16.12	16.26	14.74	11.51	14.71	21.03	19.78	9.16	5.06	NA
Solyc00g185750	Dual specificity phosphatase (AHRD V1 **** Q2UGE9_ASPOR); contains Interpro domain(s) IPR020422 Dual specificity phosphatase, subgroup, catalytic domain	0	0	0	0	0	0	0	0	0	0	0	0	0	0	0	0	0	0	0	0	0	0	0	0	0	0	0	0	NA
Solyc00g185850	Histone-lysine N-methyltransferase, H3 lysine-9 specific SUVH6 (AHRD V1 ***- SUVH6_ARATH)	0	0	0	0	0	0	0	0	0	0	0	0	0	0	0	0	0	0	0	0	0	0	0	0	0	0	0	0	NA
Solyc00g186050	Unknown Protein (AHRD V1)	0	0	0	0	0	0.18	0.57	0.57	0.22	0.22	0	0.47	0	0.18	0.24	0	0.17	0	0	0	0	0.25	0.28	0	0	0	0	0	NA
Solyc00g187050	Leucyl aminopeptidase (AHRD V1 ***- D7DWG6_NOSA0); contains Interpro domain(s) IPR011356 Peptidase M17, leucyl aminopeptidase	1710.02	1654.5	11.06	11.61	6.81	5.36	1.36	1.48	57.01	53.01	106.92	89.49	23.79	22.07	1.53	2.35	0.57	0.48	0	0	0.96	1.89	0.08	4.24	0.05	0.8	27.14	17.7	ORTHOMCL1452	3	2	3	1	1
Solyc00g188250	Mutator-like transposase-like protein (AHRD V1 ***- Q9FI74_ARATH)	0.21	0.65	0.74	1.01	0	0	0.76	0.51	0	0	0.36	0.62	0	0.24	0.32	0.8	0.91	0.24	0.19	0.19	0	0	0	0	0	0	0	0	ORTHOMCL20987	2	0	0	0	0
Solyc00g188750	Unknown Protein (AHRD V1)	0	0	0	0	0	0	0	0	0	0	0	0	0	0	0	0	0	0	0	0	0	0	0	0	0	0	0	0	NA
Solyc00g188850	Glycosyltransferase CAZy family GT90 (Fragment) (AHRD V1 **-- D8R0N7_SELML); contains Interpro domain(s) IPR008539 Protein of unknown function DUF821, CAP10-like	0.37	0.13	0.29	0	0	0	0	0	0	0	0	0	0	0	0	0	0	0	0	0	0	0	0	0	0	0	0.34	0	NA
Solyc00g192150	Mutator-like transposase (AHRD V1 ***- Q9FW81_ORYSJ); contains Interpro domain(s) IPR018289 MULE transposase, conserved domain	0	0.05	0	0	0	0	0	0	0	0	0	0	0	0	0	0	0	0	0	0	0	0	0	0	0	0	0	0	ORTHOMCL225	23	3	0	0	0
Solyc00g195350	Serine/threonine-protein phosphatase 7 long form homolog (AHRD V1 ***- PPP7L_ARATH); contains Interpro domain(s) IPR019557 Aminotransferase-like, plant mobile domain	0	0	0	0	0	0	0	0	0	0	0	0.4	0	0	0	0	0	0	0	0	0	0	0	0	0.31	0	0	0	NA
Solyc00g195360	Serine/threonine-protein phosphatase 7 long form homolog (AHRD V1 **-- PPP7L_ARATH); contains Interpro domain(s) IPR019557 Aminotransferase-like, plant mobile domain	0	0	0	0	0	0	0.13	0.38	0	0	0.18	0	0	0	0	0	0	0	0.67	1.09	0	0	0	0.12	5.79	6.55	0	0	ORTHOMCL13956	3	0	0	0	0
Solyc00g196060	Auxin response factor 6 (AHRD V1 ***- E0AD21_SOLLC); contains Interpro domain(s) IPR010525 Auxin response factor	35.12	31.61	61.21	63.68	17.64	16.54	41.36	37.91	68.21	58.12	72.26	67.54	58.88	54.46	65.63	65.63	52.62	53.11	45.07	45.36	51.5	55.95	48.05	47.72	41.95	48.11	20.38	16.96	NA
Solyc00g196460	Unknown Protein (AHRD V1)	0	0	0	0	0	0	0	0	0	0	0	0	0	0	0	0	0	0	0	0	0	0	0	0	0	0	0	0	ORTHOMCL108	41	0	0	0	0
Solyc00g198360	Zinc finger CCCH domain-containing protein 30 (AHRD V1 *-*- C3H30_ORYSJ); contains Interpro domain(s) IPR000571 Zinc finger, CCCH-type	0	0	0	0	0	0	0	0	0	0	0	0	0	0	0	0	0	0	0	0	0	0	0	0	0	0	0	0	ORTHOMCL2854	7	0	0	0	0
Solyc00g199960	Unknown Protein (AHRD V1)	0	0	0	0	0	0	0	0	0	0	0	0	0	0	0	0	0	0	0	0	0	0	0	0	0	0	0	0	NA
Solyc00g201060	Unknown Protein (AHRD V1)	0	0	0	0	0	0	0	0	0	0	0	0	0	1.29	0	0	0	0	0	0	0	0	0	0	0	0	0	0	NA
Solyc00g201160	Receptor protein kinase (AHRD V1 **** Q40096_IPOTF); contains Interpro domain(s) IPR002290 Serine/threonine protein kinase	0.31	0.4	0.45	0.74	2.2	1.88	3.16	3.81	0	0.33	0.39	0.34	0	0.45	1.79	1.18	0.34	0.35	0.07	0.07	0.48	0.25	0	0.52	0.18	0.1	0.76	0.34	NA
Solyc00g201460	Ulp1 protease family C-terminal catalytic domain containing protein (AHRD V1 *-*- Q60D46_SOLDE)	0	0.13	0	0	0.14	0	0	0	0	0	0	0	0.14	0	0	0	0	0	0	0	0	0	0	0	0	0	0	0	ORTHOMCL134	36	1	0	0	0
Solyc00g201760	Unknown Protein (AHRD V1)	0	0	0	0	0	0	0	0	0	0	0	0	0	0	0	0	0	0	0	0	0	0	0	0	0	0	0	0	NA
Solyc00g202560	Beta-1 3-glucanase (AHRD V1 ***- Q8S2G6_ORYSJ); contains Interpro domain(s) IPR000490 Glycoside hydrolase, family 17	0	0	0	0	0	0	0	0	0	0	0	0	0	0	0	0	0	0	0	0	0	0	0	0	0	0	0	0	NA
Solyc00g203660	Ribulose bisphosphate carboxylase large chain (Fragment) (AHRD V1 ***- C9WX59_9GENT); contains Interpro domain(s) IPR000685 Ribulose bisphosphate carboxylase, large subunit, C-terminal	0.14	0.3	0	0.17	0.98	0.33	0	0	0	0	0.24	0.21	0.33	0.33	0	0	0	0	0.9	0.53	0	0	0.25	0	0	0.38	0	0	NA
Solyc00g206460	Os06g0220000 protein (Fragment) (AHRD V1 **-- Q0DDJ2_ORYSJ); contains Interpro domain(s) IPR006766 Phosphate-induced protein 1 conserved region	25.24	22.88	39.52	42.39	63.12	65.31	33.62	32.25	66.74	65.79	18.37	17.79	6.98	6.52	105.73	103.73	21.02	22.4	126.02	122.37	15.82	10.07	6.79	7.32	17.85	12.26	23.63	31.13	NA
Solyc00g207960	Unknown Protein (AHRD V1); contains Interpro domain(s) IPR012287 Homeodomain-related	0	0	0	0	0	0	0.23	0	0	0	0	7.32	0	1.32	1.76	1.94	0	0	0	0	1.48	0.61	1.34	1.71	0.88	1	0	0	ORTHOMCL21005	2	0	0	0	0
Solyc00g209460	GDSL esterase/lipase At1g71691 (AHRD V1 ***- GDL29_ARATH); contains Interpro domain(s) IPR001087 Lipase, GDSL	0.77	1.05	0.3	0.31	0	0.59	0	0	0.36	1.44	0.87	0.38	1.47	0.89	2.37	0.33	1.39	0.86	0.46	0.24	4.78	4.09	4.49	1.72	0.89	2	0.36	0	ORTHOMCL20986	1	1	0	0	0
Solyc00g209560	Ulp1 protease family C-terminal catalytic domain containing protein (AHRD V1 *-*- Q60D46_SOLDE)	0	0	0	0	0	0	0.13	0	0	0	0	0	0	0	0	0	0	0	0	0	0	0	0	0	0	0	0	0	ORTHOMCL34	59	1	0	0	0
Solyc00g210860	Unknown Protein (AHRD V1)	0	0	0	0	0	0	0	0	0	0	0	1.93	0	0	0	0	0	0	0	0	0	0	0	0	0	0	0	0	ORTHOMCL20985	2	0	0	0	0
Solyc00g212260	GH3 family protein (AHRD V1 *-*- B9GQG9_POPTR); contains Interpro domain(s) IPR004993 GH3 auxin-responsive promoter	0.16	0.16	0.37	0.19	0.9	1.1	0.9	1	0.05	0	0.2	0.06	0.14	0.09	0.12	0.15	0.22	0.27	0	0	0.49	0.25	0.21	0.04	0.05	0.05	0.06	0.35	ORTHOMCL336	13	4	2	1	1
Solyc00g213960	Unknown Protein (AHRD V1)	0	0	0	0	0	0	0	0	0	0	0	0	0	0	0	0	0	0	0	0	0	0	0	0	0	0	0	0	NA
Solyc00g215560	Unknown Protein (AHRD V1)	0	1.47	0.33	0.69	1.3	0.66	0.69	1.72	0	0	0	0	0.33	1	1.33	1.46	0.31	0.32	2.3	0.53	0	0	0	0	0	0	0	0	ORTHOMCL20984	2	0	0	0	0
Solyc00g217560	Transcription factor CYCLOIDEA (Fragment) (AHRD V1 *-*- CYCLD_ANTML); contains Interpro domain(s) IPR005333 Transcription factor, TCP	0.16	0.66	0.38	0.39	0.37	1.31	0.39	1.55	0	0	0	0	0	0	0	0	0	0	0	0	0	0	0	0	0	0	2.25	0	ORTHOMCL13955	2	1	0	0	0
Solyc00g217960	Ring H2 finger protein (AHRD V1 *-*- D9ZHD8_HYPPE); contains Interpro domain(s) IPR018957 Zinc finger, C3HC4 RING-type	19.22	19.47	12.29	14.03	14.6	14.87	15.46	9.22	7.46	7.83	11.39	5.67	24.92	19.3	36.72	35.93	61.95	58.98	25.13	26.47	19.41	27.31	26.62	30.36	21.03	17.53	2.41	1.67	ORTHOMCL20983	1	1	0	0	0
Solyc00g218560	Unknown Protein (AHRD V1)	0	0	0	0	0	0	0	0	0	0	0	0	0	0	0	0	0	0	0	0	0	0	0	0	0	0	0	0	NA
Solyc00g220360	Unknown Protein (AHRD V1)	0	0	0	0	0	0	0	0	0	0	0	0	0	0	0	0	0	0	0	0	0	0	0	0	0	0	0	0	ORTHOMCL34	59	1	0	0	0
Solyc00g222060	Unknown Protein (AHRD V1)	0	0	0	0	0	0	0	0	0	0	0	0	0	0	0	0	0	0	0	0	0	0	0	0	0	0	0	0	NA
Solyc00g222460	Gag-Pol polyprotein (AHRD V1 ***- B8YLY4_MEDTR)	0	0	0	0	0	0	0.36	0.72	0.42	0	0	0	0	0	0	0	0	0	0.27	0	0	2.87	4.2	2.01	6.9	8.58	0	0	ORTHOMCL11250	4	0	0	0	0
Solyc00g226760	Steroid sulfotransferase 3 (AHRD V1 **** O82410_BRANA); contains Interpro domain(s) IPR000863 Sulfotransferase	0	0	0	0	0	0	0	0	0.12	0	0	0.13	0.2	0.1	0	0	0	0	0	0	0	0	0	0	0	0	0	0	ORTHOMCL13954	3	0	0	0	0
Solyc00g227860	UDP-glucosyltransferase (AHRD V1 ***- B3VI56_STERE); contains Interpro domain(s) IPR002213 UDP-glucuronosyl/UDP-glucosyltransferase	18.24	16.93	23.81	24.58	40.74	38.15	16.75	12.82	14.15	15.02	8.49	7.75	4.64	4.04	11.26	11.06	3.34	4.07	0.59	0.84	8.07	5.21	1.69	1.96	0.7	0.79	92.51	69.86	ORTHOMCL562	4	6	1	4	1
Solyc00g227960	Sulfotransferase family protein (AHRD V1 **** D7LQL2_ARALY); contains Interpro domain(s) IPR000863 Sulfotransferase	0	0	0	0	0	0	0	0	0.13	0	0	0.14	0.21	0.11	0	0	0	0	0	0	0	0	0	0	0	0	0	0	ORTHOMCL13954	3	0	0	0	0
Solyc00g228260	Unknown Protein (AHRD V1)	0.55	1.12	0	0	0	0	0	0	0	0	0	0	0	0	0	0	0	0	0	0	0	0	0	0	0	0	0	0	ORTHOMCL20982	1	1	0	0	0
Solyc00g229260	TdcA1-ORF2 protein (Fragment) (AHRD V1 *--- Q948N9_DAUCA)	0.15	0	0	0	0	0	0	0	0	0	0	0	0	0	0	0	0	0	0	0	0	0	0	0	0	0.2	0	0	ORTHOMCL6208	1	4	0	0	0
Solyc00g230060	RNase H family protein (AHRD V1 ***- Q0KIQ6_SOLDE); contains Interpro domain(s) IPR012337 Polynucleotidyl transferase, ribonuclease H fold	0.97	0.4	0.9	1.86	0.33	1.01	0	0	0.94	0.14	1.32	0.29	1.67	1.12	0.3	0.25	0.21	0.22	0.09	0.09	0	0	0	0	0	0.13	0	0	NA
Solyc00g230070	Photosystem II CP43 chlorophyll apoprotein (AHRD V1 ***- D1L8N4_BRANA); contains Interpro domain(s) IPR000932 Photosystem antenna protein-like	15.84	14.55	21.8	22.83	32.98	35.09	0	0.78	12.55	9.54	31.2	37.19	31.15	36.57	9.96	4.11	3.16	3.63	3.74	2.69	3.52	3.1	6.23	5.07	1.12	4.21	4.06	7.03	ORTHOMCL2088	7	1	0	0	0
Solyc00g230080	Photosystem II D2 protein (AHRD V1 ***- D0FXW8_DUNSA); contains Interpro domain(s) IPR000484 Photosynthetic reaction centre, L/M	9.09	10.76	18.63	18.88	36.86	35.05	1.15	0	8.95	8.06	21.05	26.09	37.3	33.11	4.05	4.86	2.33	1.61	1.06	0.66	2.6	2.29	5.03	2.68	1.65	0.31	3.67	0.69	ORTHOMCL2912	2	3	0	2	0
Solyc00g230280	Unknown Protein (AHRD V1)	0	0	0	0	0	0	0	0	0	0	0	0	0	0	0	0	0	0	0	0	0	0	0	0	0	0	0	0	NA
Solyc00g231680	Mannan endo-1 4-beta-mannosidase (AHRD V1 ***- A8FDC6_BACP2); contains Interpro domain(s) IPR001547 Glycoside hydrolase, family 5	0	0	0	0.09	0	0	0	0	0	0	0.12	0	0	0	0	0	0	0	0	0	0	0	0	0.16	0.08	0	0	0	ORTHOMCL1068	2	4	0	5	0
Solyc00g231780	NAD(P)H-quinone oxidoreductase subunit I chloroplastic (AHRD V1 *-*- D3WFI2_TROAR); contains Interpro domain(s) IPR009051 Alpha-helical ferredoxin	2.37	2.43	0.61	0.32	0.9	1.52	1.26	0.63	0	0.74	1.78	0.78	1.51	1.22	1.22	0.67	0.57	0.89	1.64	1.7	0.82	1.26	1.39	1.18	0.91	1.37	1.1	0.76	NA
Solyc00g233480	ABC transporter-like protein (AHRD V1 *-*- Q6K376_ORYSJ)	0.46	0	0.9	0.19	1.4	2.68	45.47	45.78	0.64	0.65	2.09	1.82	0.53	0.54	3.81	2.36	0	0.52	0	0	0	0	0	0.35	0	0	0.22	0	ORTHOMCL20981	1	1	0	0	0
Solyc00g237680	Unknown Protein (AHRD V1)	0	0	0	0	0	0	0	0	0	0	0	0	0	0	0	0	0	0	0	0	0	0	0	0	0	0	0	0	NA
Solyc00g240580	Unknown Protein (AHRD V1)	0	0	0	0	0.63	0	0	0.67	0	0	0	0	0	0.64	0	0	0	0	0.5	0.52	0	0	0	0	0	0	0	0	NA
Solyc00g244280	Unknown Protein (AHRD V1)	0	0	0	0	0	0	0	0	0	0	0	1.38	0	0.54	0	0	0	0	0	0	0	0	0	0	0	0	0	0	NA
Solyc00g244290	NADH dehydrogenase subunit II (Fragment) (AHRD V1 *-*- O79467_SOLTU)	1.91	2.66	2.42	3.32	1.97	2.4	3.96	4.99	3.61	4.14	4.11	3.33	5.97	6.21	5.34	3.75	9.6	9.55	9.87	8.5	4.31	4.15	4.87	3.5	1.8	2.49	0.48	2.51	ORTHOMCL13953	2	1	0	0	0
Solyc00g244300	Unknown Protein (AHRD V1)	2.32	2.03	3.46	4.35	1.87	0	13.1	11.1	4.13	1.39	10.08	8.78	19.73	16.8	11.72	16.82	16.15	18.22	8.24	8.87	7.71	3.17	3.48	4.45	1.9	2.59	0	4.79	NA
Solyc00g245200	Photosystem I P700 chlorophyll a apoprotein A1 (AHRD V1 ***- D3WDZ5_9ROSA); contains Interpro domain(s) IPR001280 Photosystem I psaA and psaB	0	0.47	0.53	1.1	1.56	2.12	0	0	0	0.64	2.33	1.35	2.63	3.71	0.71	0	0	0	0.41	0.42	0	0	0	0	0	0	0	0	NA
Solyc00g246800	Unknown Protein (AHRD V1)	0	0	0	0	0	0	0	0	0	0	0	0	0	0	0	0	0	0	0	0	0	0	0	0	0	0	0	0	ORTHOMCL51	53	0	0	0	0
Solyc00g247300	Cytochrome P450	0.2	0	10.06	11.42	0.22	0.17	32.35	33.55	0.41	0.49	2.76	1.82	2.27	2.45	26.21	27.98	0.59	0.67	0.04	0.09	2.07	0.79	0.17	0	0.17	0	0	0	ORTHOMCL159	8	23	0	2	0
Solyc00g249200	Ulp1 protease family C-terminal catalytic domain containing protein (AHRD V1 *-*- Q60D46_SOLDE)	0	0	0.15	0	0	0	0	0	0	0	0	0	0	0	0	0	0	0	0	0	0	0	0	0	0	0	0	0	ORTHOMCL1055	10	1	0	0	0
Solyc00g249900	Adaptin N terminal region family protein expressed (AHRD V1 *-*- Q10SS6_ORYSJ); contains Interpro domain(s) IPR002553 Clathrin/coatomer adaptor, adaptin-like, N-terminal	15.63	12.61	13.6	15.77	10.72	10.55	18.12	15.54	24.31	22.7	19.98	18.34	35	31.16	25.71	33.11	23.88	19.71	9.17	8.15	9.25	12.73	10.99	7.74	6	7.62	2.97	1.69	NA
Solyc00g249910	Adaptin N terminal region family protein expressed (AHRD V1 ***- Q10SS5_ORYSJ)	15.22	11.17	13.46	13.46	9	7.64	25.41	19.03	23.38	25.56	15.68	11.71	8.73	9.55	17.33	18.09	11.13	13.39	7.94	6.12	5.65	6.87	8.7	4.08	4.57	5.17	2.31	4.32	NA
Solyc00g254110	Unknown Protein (AHRD V1)	0	0	0	0	0	0	0	0	0	0	0	0	0	0	0	0	0	0	0	0	0	0	0	0	0	0	0	0	NA
Solyc00g254910	Indole-3-acetic acid-amido synthetase GH3.8 (AHRD V1 *--- B6U4E2_MAIZE); contains Interpro domain(s) IPR004993 GH3 auxin-responsive promoter	4.45	5	9.85	9.49	23.14	24.2	28.81	30.2	0.45	0.31	0	0	0.37	0.75	2.17	3.31	5.42	5.49	0.48	0.3	5.23	6.24	4.19	2.68	1.25	2.97	11.06	11.33	ORTHOMCL20980	2	0	0	0	0
Solyc00g255510	Unknown Protein (AHRD V1); contains Interpro domain(s) IPR003441 No apical meristem (NAM) protein	0	0.06	0	0	0	0	0	0	0	0	0	0	0	0	0	0	0	0	0	0	0	0	0.11	0	0	0	0	0	NA
Solyc00g256710	Unknown Protein (AHRD V1)	29.82	30.16	12.75	15.18	30.7	26.91	51.84	47.25	27.08	25.04	29.6	34.88	27.53	21.76	42.77	40.53	32.73	31.98	22.86	25.03	26.63	27.91	15.62	13.44	11.45	9.82	12.91	8.45	ORTHOMCL20979	2	0	0	0	0
Solyc00g257110	H-ATPase (AHRD V1 **** Q8L6I3_ORYSJ); contains Interpro domain(s) IPR006534 ATPase, P-type, plasma-membrane proton-efflux	1194.82	1174.41	1235.02	1233.33	0.1	0.3	2.35	3.34	1.27	0.98	0.22	0.45	4.04	4.72	2.01	2.66	0.33	0.73	0.08	0.08	0	0.07	0	0	0.05	1.25	0	0	ORTHOMCL82	8	8	12	11	8
Solyc00g263210	Unknown Protein (AHRD V1)	0	0	0	0	0	0	0	0	0	0	0	0	0	0	0	0	0	0	0	0	0	0	0	0	0	0	0	0	NA
Solyc00g265110	RNA-binding protein Nova-1 (Fragment) (AHRD V1 *--- NOVA1_RAT); contains Interpro domain(s) IPR018111 K Homology, type 1, subgroup	7.27	5.82	3.68	0.76	1.79	1.46	0.38	0	6.57	1.33	6.42	6.06	3.26	2.92	3.41	0.8	2.4	1.42	0.84	0.88	2.95	0	1.66	2.12	0	0.41	3.97	0.46	NA
Solyc00g265510	Unknown Protein (AHRD V1)	0	0	0	0	0	1.97	0	0.68	0	0	0	0	0	0.66	0	0	0	0	0	0	0	0	0	0	0	0	0	0	NA
Solyc00g266110	Indole-3-acetic acid-amido synthetase GH3.8 (AHRD V1 **-- B6U4E2_MAIZE); contains Interpro domain(s) IPR004993 GH3 auxin-responsive promoter	0	0	0	0	0	0	0	0	0	0	0	0	0	0	0	0	0	0	0	0	0	0	0	0	0	0	0	0	ORTHOMCL20978	2	0	0	0	0
Solyc00g268310	Major facilitator superfamily transporter (AHRD V1 *--- A2W2R0_9BURK); contains Interpro domain(s) IPR016196 Major facilitator superfamily, general substrate transporter	0	0	0	0	0	0	0	0	0	0	0	0	0	0	0	0	0	0	0	0	0	0	0	0	0	0	0	0	NA
Solyc00g269810	F-box family protein (AHRD V1 *-*- D7LSF9_ARALY); contains Interpro domain(s) IPR001810 Cyclin-like F-box	0	0	0	0	0	0	0	0	0	0	0	0	0	0	0	0	0	0	0	0	6.72	5.09	5.45	5.78	9.35	10.18	0.11	0	ORTHOMCL4107	2	4	0	0	0
Solyc00g270510	Nuclear transcription factor Y subunit B-6 (AHRD V1 *-** B6UH02_MAIZE); contains Interpro domain(s) IPR003957 Transcription factor, CBFA/NFYB, DNA topoisomerase	0	0	0	0	0	0	0	0	0	0	0	0	0	0	0	0	0	0	0	0	0	0	0	0	0	0	0	0	NA
Solyc00g272810	N-acetyltransferase (AHRD V1 ***- B6SUK9_MAIZE); contains Interpro domain(s) IPR000182 GCN5-related N-acetyltransferase	4.35	4.33	6.97	5.49	149.66	155.95	9.31	9.16	5.05	7.27	3.18	2.95	1.08	0.68	0.72	0.6	0.77	0.79	0.52	0.33	0.37	0.38	1.03	1.05	0.41	0.61	134.14	100.87	NA
Solyc00g273110	Unknown Protein (AHRD V1)	4.06	5.08	2.1	0.54	3.07	4.17	3.25	2.71	0.63	3.17	5.35	7.99	3.11	4.69	11.13	4.02	0.98	3.05	3.21	4.59	6.31	7.93	5.54	3.54	8.32	12.35	0.63	4.58	NA
Solyc00g275310	Unknown Protein (AHRD V1); contains Interpro domain(s) IPR013101 Leucine-rich repeat 2	0	0	0	0	0	0	0	0	0	0	0	0	0	0	0	0	0	0	0	0	5.1	4.21	4.38	4.47	6.24	8.36	0.1	0.41	ORTHOMCL4107	2	4	0	0	0
Solyc00g277510	Photosystem Q(B) protein (AHRD V1 ***- Q95B48_PRUPE); contains Interpro domain(s) IPR000484 Photosynthetic reaction centre, L/M	15.29	14.34	21.73	23.37	21.66	20.59	0.51	0.51	20.01	22.07	67.58	69.5	76.48	80.38	5.23	6.48	1.38	2.86	20.39	21.19	28.37	24.41	26.06	30.44	58.68	74.68	13.03	16.62	NA
Solyc00g278110	CER1 (AHRD V1 **-- B6TFH3_MAIZE)	2.36	2.95	2.28	2.35	14.39	12.24	0.16	0.16	0.18	0	0	0	0	0	0	0.17	0	0	0	0.24	0	0	0	0	0.3	0	0.73	1.52	NA
Solyc00g280110	Plant-specific domain TIGR01589 family protein (AHRD V1 ***- B4FFL2_MAIZE); contains Interpro domain(s) IPR006476 Conserved hypothetical protein CHP01589, plant	7.97	6.99	3.97	5.45	0	2.63	0	0	0	0	0	0	0	0	0	0	0	0	0	0	0	0	0	0	0	0	10.32	10.72	ORTHOMCL20977	1	1	0	0	0
Solyc00g281110	Unknown Protein (AHRD V1)	0	0	0	0	0	0	0	0	0	0	0	0	0	0	0	0	0	0	0	0	0	0	0	0	0	0	0	0	ORTHOMCL20976	1	1	0	0	0
Solyc00g282510	Phenylalanine ammonia-lyase (AHRD V1 ***- B5LAW0_CAPAN); contains Interpro domain(s) IPR005922 Phenylalanine ammonia-lyase	4.37	4.33	3.52	3.97	1.53	1.11	30.8	31.86	6.46	3.98	6.1	3.05	9.1	7.71	6.96	8.19	4.07	4.21	3.08	2.75	3.66	2.69	1.85	2.8	0.17	0.44	0.8	0.77	ORTHOMCL95	9	7	4	15	8
Solyc00g283010	Multidrug resistance protein ABC transporter family (AHRD V1 **-- B9GX56_POPTR); contains Interpro domain(s) IPR003439 ABC transporter-like	0.13	0.14	0	0	0	0.05	1.85	0.9	0	0.06	0	0	0	0	0	0	0	0	0	0	0	0	0	0	0	0	0	0.19	ORTHOMCL18	13	16	10	25	10
Solyc00g283110	Unknown Protein (AHRD V1)	0	0	0	0	0	0	0	0	0	0	0	0	0	0	0	0	0	0	0	0	0	0	0	0	0	0	0	0	NA
Solyc00g284510	Unknown Protein (AHRD V1)	0	0	0	0.13	0	0	0	0	0	0	0	0	0	0	0	0	0	0	0	0	0	0	0	0	0	0	0	0	ORTHOMCL2854	7	0	0	0	0
Solyc00g286010	Plasmid partitioning protein RepA (AHRD V1 **-- D0DDW4_9RHOB)	0	0	0	0	0	0	0	0	0	0	0	0	0	0	0	0	0	0	0	0	0	0	0	0	0	0	0	0	NA
Solyc00g286020	Plasmid partitioning protein RepB (AHRD V1 **-- B8ISQ1_METNO); contains Interpro domain(s) IPR017819 Plasmid partitioning protein, RepB	0	0	0	0	0	0	0	0	0	0	0	0	0	0	0	0	0	0	0	0	0	0	0	0	0	0	0	0	NA
Solyc00g286030	Replication protein C (AHRD V1 ***- B9K4F1_AGRVS); contains Interpro domain(s) IPR005090 Replication protein C	0	0	0	0	0	0	0	0	0	0	0	0	0	0	0	0	0	0	0	0	0	0	0	0	0	0	0	0	NA
Solyc00g287330	Unknown Protein (AHRD V1); contains Interpro domain(s) IPR013699 Signal recognition particle, SRP72 subunit, RNA-binding	0	0	0	0	0	0	0	0	0	0	0	0	0	0	0	0	0	0	0	0	0	0	0	0	0	0	0	0	ORTHOMCL6212	5	0	0	0	0
Solyc00g289230	Receptor protein kinase (AHRD V1 **** Q40096_IPOTF); contains Interpro domain(s) IPR002290 Serine/threonine protein kinase	1.39	1.5	6.83	6.83	6.65	7.06	6.36	6.45	0.11	0.11	0.14	0.12	0.09	0	0.25	0.41	0.18	0.37	0	0.15	0.89	2.6	0.71	1.46	0	0.42	3.98	3.07	ORTHOMCL6207	1	4	0	0	0
Solyc00g294230	Tir-nbs, resistance protein fragment	0.28	0.15	0.17	0	0.16	0.33	0	0	0.99	0.8	0.48	0.63	0.16	0	0.22	0.18	0.15	0	0	0	0	0	0	0	0	0	0	0	NA
Solyc00g294630	Mutator-like transposase (AHRD V1 ***- Q9SR14_ARATH); contains Interpro domain(s) IPR018289 MULE transposase, conserved domain	0	0	0	0	0	0	0	0	0	0	0	0	0	0	0	0	0	0	0	0	0	0	0	0	0	0	0	0	NA
Solyc00g297330	Unknown Protein (AHRD V1)	0	0	0	0	0	0	0	0	0	0	0	0	0	0	0	0	0	0	0	0	0	0	0	0	0	0	0	0	ORTHOMCL4114	4	2	0	0	0
Solyc00g300430	Unknown Protein (AHRD V1)	0	0	0	0	0	0	0	0	0	0	0	0	0	0	0	0	0	0	0	0	0	0	0	0	0	0	0	0	NA
Solyc00g300730	E3 ubiquitin-protein ligase sina (AHRD V1 ***- B0WR23_CULQU); contains Interpro domain(s) IPR004162 Seven in absentia protein	0	0	0	0	0	0	0	0	0	0	0	0	0	0	0	0	0	0	0	0	0	0	0	0	0	0	0	0	NA
Solyc00g303630	Unknown Protein (AHRD V1)	0	0	0	0	0	0	0	0	0	0	0	0	0	0	0	0	0	0	0	0	0	0	0	0	0	0	0	0	NA
Solyc00g304030	Macrolide export ATP-binding/permease protein MacB (AHRD V1 *-*- C5BS18_TERTT); contains Interpro domain(s) IPR003439 ABC transporter-like	0	0	0	0	0	0	0	0	0	0	0	0	0	0	0	0	0	0	0	0	0	0	0	0	0	0	0	0	ORTHOMCL4106	1	5	0	0	0
Solyc00g304630	Ulp1 protease family C-terminal catalytic domain containing protein (AHRD V1 *-*- Q60D46_SOLDE)	0	0	0	0	0	0	0	0	0	0	0	0	0	0	0	0	0	0	0	0	0	0	0	0	0	0	0	0	ORTHOMCL13952	3	0	0	0	0
Solyc00g306730	Mutator-like transposase (AHRD V1 ***- Q9SLM0_ARATH); contains Interpro domain(s) IPR004332 Transposase, MuDR, plant	0	0	0	0	0	0	0	0	0	0	0	0	0	0	0	0	0	0	0	0	0	0	0	0	0	0	0	0	ORTHOMCL225	23	3	0	0	0
Solyc00g306830	Glucose-methanol-choline oxidoreductase (AHRD V1 *--- C9S8I2_VERA1); contains Interpro domain(s) IPR000172 Glucose-methanol-choline oxidoreductase, N-terminal	0	0	0	0	0	0	0	0	0	0	0	0	0	0	0	0	0	0	0	0	0	0	0	0	0	0	0	0	NA
Solyc00g308530	Unknown Protein (AHRD V1)	0	0	0	0	0	0	0	0	0	0	0	0	0	0	0	0	0	0	0	0	0	0	0	0	0	0	0	0	NA
Solyc00g308930	Lysine-specific histone demethylase 1 homolog 3 (AHRD V1 ***- LDL3_ARATH)	0	0	0	0	0	0	0	0	0	0	0	0	0	0	0	0	0	0	0	0	0	0	0	0	0	0	0	0	ORTHOMCL20975	2	0	0	0	0
Solyc00g309530	Unknown Protein (AHRD V1)	0	0.55	0	0	0	0	0	0	0.74	0	0	0	0	0	0	0	0	0	0	0.5	0	0	0.94	0	0	0	0	0	NA
Solyc00g311230	Unknown Protein (AHRD V1)	0.66	0.41	0.62	0.16	1.35	0.77	0.32	0.32	1.1	0.93	0.9	0.59	0.3	0.76	0.82	1.01	0.29	0.15	0	0	0.41	0.42	0	0.15	0	0	0	0	NA
Solyc00g313030	Unknown Protein (AHRD V1)	0	0	0	0	0	0	0	0	0	0	0	0	0	0	0	0	0	0	0	0	0	0	0	0	0	0	0	0	NA
Solyc00g313530	Unknown Protein (AHRD V1)	0	0	0	0	0	0	0	0	0	0	0	0	0	0	0	0	0	0	0	0	0	0	0	0	0	0	0	0	ORTHOMCL226	26	0	0	0	0
Solyc00g313930	Unknown Protein (AHRD V1)	0	0	0	0	0	0	0	0	0	0	0	0	0	0.66	0	0	0	0	0	0	0	0	0	0	0	0	0	0	NA
Solyc00g316030	Mutator-like transposase (AHRD V1 ***- Q9SHU0_ARATH); contains Interpro domain(s) IPR006564 Zinc finger, PMZ-type	0.1	0.1	0	0	0	0	0	0	0	0	0	0	0	0	0	0	0	0	0	0	0	0	0	0	0	0	0	0	ORTHOMCL20974	1	1	0	0	0
Solyc00g316530	Unknown Protein (AHRD V1)	0.36	0	0.84	0.43	0	0.83	0	0	0	2.02	0	0	0.41	0.42	0	0	0	0	0	0	0.56	0	0	0	0	0	0	0	ORTHOMCL20973	1	1	0	0	0
Solyc00g316730	Mutator-like transposase (AHRD V1 ***- Q9SHU0_ARATH); contains Interpro domain(s) IPR006564 Zinc finger, PMZ-type	0	0.12	0	0	0	0	0	0	0	0	0	0	0	0	0	0	0	0	0	0	0	0	0	0	0	0.15	0	0	NA
Solyc00g318030	Unknown Protein (AHRD V1)	0	0	0	0	0	0	0	0	0	0	0	0	0	0	0	0	0	0	0	0	0	0	0	0	0	0	0	0	ORTHOMCL51	53	0	0	0	0
Solyc00g318130	Paired amphipathic helix protein SIN3 (AHRD V1 *--- B3LJ52_YEAS1); contains Interpro domain(s) IPR003822 Paired amphipathic helix	0	0	0	0	0	0	0	0	0.14	0.42	0.17	0	0.23	0	0	0	0	0	0	0	0.16	0	0	0	0	0	0	0	NA
Solyc00g318830	Os01g0126600 protein (Fragment) (AHRD V1 ***- Q0JR16_ORYSJ)	0.15	1.1	1.25	0.55	0	0	0	0	0	0.43	0.26	0.45	0	0	0	0.39	0.17	0	0.27	0.57	0.24	0.98	0.8	0.51	3.17	3.99	0	1.33	NA
Solyc00g320430	Unknown Protein (AHRD V1)	0	0	0	0	0	0	0	0	0	0	0	1.4	0	0	0	0	0	0	0	0	0	0	0	0	0	0	0	0	ORTHOMCL20972	1	1	0	0	0
Solyc00g322630	Indole-3-acetic acid-amido synthetase GH3.8 (AHRD V1 ***- B6U4E2_MAIZE); contains Interpro domain(s) IPR004993 GH3 auxin-responsive promoter	0	0	0	0	0	0	0	0	0	0	0.49	0	0	0	0	0	0	0	0	0	0	0	0	0	0	0	0	0	ORTHOMCL20978	2	0	0	0	0
Solyc00g322830	Unknown Protein (AHRD V1)	0	0	0	0	0	0	0	0	0	0	0	0	0	0	0	0	0	0	0	0	0	0	0	0	0	0	0	0	NA
Solyc00g323130	Major latex-like protein (AHRD V1 **-- B5THI3_PANGI); contains Interpro domain(s) IPR000916 Bet v I allergen	3.26	2.26	0.67	0.57	33.19	32.37	389.29	378.87	0	0	0	0	0	0	0	0	0.1	0	0	0	0	0	0	0	0.11	0	15.67	14.61	ORTHOMCL457	3	2	10	3	0
Solyc00g324530	Ulp1 protease family C-terminal catalytic domain containing protein (AHRD V1 *-*- Q60D46_SOLDE)	0	0.21	0	0	0	0	0	0	0	0	0	0	0	0	0	0	0	0	0	0	0	0	0	0	0	0	0	0	ORTHOMCL34	59	1	0	0	0
Solyc01g005000	Glutamate decarboxylase (AHRD V1 ***- Q1I1D8_CITSI); contains Interpro domain(s) IPR010107 Glutamate decarboxylase	29.78	29.55	22.08	23.62	17.98	17.68	9.96	9.65	22.32	20.81	37.62	32.55	33.53	34.31	14.32	15.17	1.35	1.96	1.02	1.24	4.71	4.05	1.39	1.95	1.77	1.23	7.97	9.15	ORTHOMCL310	5	4	5	3	5
Solyc01g005010	Protein XRI1 (AHRD V1 *-*- XRI1_ARATH)	4.74	4.21	4.52	5.12	7.31	7.18	7.65	6.24	6.36	7.54	7.11	5.39	4.19	4.93	3.11	2.27	1.27	1.22	0.14	0	0.85	1.61	0.68	0.35	0	0.2	12.47	10.48	ORTHOMCL3936	1	1	2	1	2
Solyc01g005020	Sodium/hydrogen exchanger Na+ H+ antiporter (AHRD V1 *--* Q8IET0_PLAF7); contains Interpro domain(s) IPR018418 Na+/H+ exchanger, isoforms 7/8, conserved region	12.96	12.5	16.18	15.12	11.36	11.12	33.36	30.76	21.76	20.68	32.44	27.8	36	33.38	34.04	34.23	25.32	23.71	16.9	17.34	29.9	34.13	28.74	28.57	18.48	16.86	9.34	10.43	ORTHOMCL2758	2	2	2	1	1
Solyc01g005030	Serine/threonine-protein kinase 36 (AHRD V1 *-*- STK36_HUMAN); contains Interpro domain(s) IPR004240 Nonaspanin (TM9SF)	8.36	8.45	7.44	7.6	7.91	7.22	14.57	12.11	8.9	7.83	9.89	8.97	14.98	15.21	27.25	25.6	38.54	38.53	22.47	23.89	27.32	29.9	23.91	22.58	7.92	7.1	4.33	3.51	ORTHOMCL386	5	5	4	3	3
Solyc01g005040	Unknown Protein (AHRD V1); contains Interpro domain(s) IPR006702 Uncharacterised protein family UPF0497, trans-membrane plant	0	0	0	0.3	1.56	0.87	0	0.15	0.17	0	0	0	0.43	0.14	0	0	0	0	0	0	0	0	0	0	0	0	0	0.54	ORTHOMCL20971	1	1	0	0	0
Solyc01g005050	Unknown Protein (AHRD V1)	71.45	73.71	37.82	44.99	0	0	0.29	0	0	0	0	0.36	0.14	0.14	0	0	0	0	0	0	0	0	0	0	0	0	0	0	NA
Solyc01g005060	Zinc finger protein (AHRD V1 *-*- Q764N7_MALDO); contains Interpro domain(s) IPR007087 Zinc finger, C2H2-type	3.22	3.5	4.59	2.91	1.79	1.59	1.26	2.68	20.51	21.06	9.24	7.85	4.07	3.42	5.47	5.02	2.43	2.66	2.34	1.15	1.02	2.31	1.04	1.77	0.91	0.51	0.83	2.1	ORTHOMCL13299	1	1	1	0	1
Solyc01g005070	Clathrin assembly protein (AHRD V1 ***- B6TYB1_MAIZE); contains Interpro domain(s) IPR011417 ANTH	4.31	3.38	15.28	16.73	0.06	0	0.07	0.13	1.24	0.86	0.19	0.49	0.13	0	0	0.07	0	0.06	0	0	0	0	0	0.06	0	0	0	0	ORTHOMCL5847	1	1	2	1	1
Solyc01g005080	Microtubule-associated protein MAP65-1a (AHRD V1 **** C0J9Z7_ORYNI); contains Interpro domain(s) IPR007145 MAP65/ASE1	26.76	24.06	61.21	62.2	13.75	14.81	29.7	32.91	23.12	20.55	16.68	14.01	9.7	8.64	26.45	23.89	12.83	13.98	6.35	7.69	6.6	7.83	5.07	3.92	2.07	2.68	13.93	14.6	ORTHOMCL2033	2	2	2	1	2
Solyc01g005090	Inositol 1 4 5-trisphosphate 5-phosphatase-like protein (AHRD V1 **** Q6H453_ORYSJ); contains Interpro domain(s) IPR000300 Inositol polyphosphate related phosphatase	0	0	0	0	0	0	20.9	20.34	0.1	0	0	0	0	0	0	0	0	0	0	0	0	0.12	0	0.08	0	0	0	0	ORTHOMCL5526	1	1	1	1	2
Solyc01g005100	Prolyl 3-hydroxylase 1 (AHRD V1 *--- P3H1_CHICK); contains Interpro domain(s) IPR006620 Prolyl 4-hydroxylase, alpha subunit	10.31	9.58	12.3	9.43	18.48	21.47	18.68	16.23	12.42	13.25	11.98	11.22	12.21	9.56	13.59	14.99	7.6	7.42	8.57	9.59	4.92	5.05	5.2	4	3.96	3.86	1.5	2.25	ORTHOMCL10052	1	1	1	1	1
Solyc01g005110	cDNA clone J065210E11 full insert sequence (AHRD V1 **-- B7F922_ORYSJ); contains Interpro domain(s) IPR013174 Dolichol-phosphate mannosyltransferase subunit 3	43.42	42.45	29.53	25.09	11.55	11.42	25.7	23.9	20.67	19.09	10	8.93	13.04	11.42	15.92	12.39	20.67	18.42	20.36	23.47	8.26	8.25	9.84	7.44	5.78	5.19	10.71	17.34	ORTHOMCL13208	1	1	1	0	1
Solyc01g005120	Xyloglucan endotransglucosylase/hydrolase 13 (AHRD V1 **** C0IRH2_ACTDE); contains Interpro domain(s) IPR016455 Xyloglucan endotransglucosylase/hydrolase	28.91	29.28	153.28	155.9	4.59	4.28	48.04	45.31	10.59	10.89	11.1	11.35	3.99	2.96	11.77	13.19	5.07	4.42	4.72	4.16	10.45	9.28	8.3	10.03	11.43	8.91	4.69	5.54	ORTHOMCL2756	2	2	2	1	1
Solyc01g005130	Zinc finger protein 7 (AHRD V1 ***- B6U8J3_MAIZE); contains Interpro domain(s) IPR007087 Zinc finger, C2H2-type	7.83	6.9	10.17	10.56	31.05	29.9	41.38	42.02	10.5	9.24	10.43	8.96	29.61	30.85	18.22	18.53	12.2	14.88	25.1	24.09	4.01	5.98	7.74	7	6.14	8.57	11.5	9.29	ORTHOMCL20970	1	1	0	0	0
Solyc01g005140	Cytochrome b561 (AHRD V1 ***- Q3LGX5_CITLA); contains Interpro domain(s) IPR006593 Cytochrome b561/ferric reductase transmembrane	0.08	0.16	2.08	0.93	0.09	0	7.74	6.24	0	0	0	0	0.09	0	5.51	4.65	12.23	10.92	16.18	16.24	1.93	1.49	5.31	4.7	16.11	16	0	0	ORTHOMCL11479	1	1	0	1	1
Solyc01g005150	Cytochrome b561 (AHRD V1 ***- Q3LGX5_CITLA); contains Interpro domain(s) IPR004877 Cytochrome b561, eukaryote	1.19	1.32	0.5	0.13	0.86	2.12	4.66	4.65	0.3	0.76	0.18	0.48	0.37	0.12	0.5	0.41	0	0.12	0	0	0.5	0	0.57	0.72	0	0	1.65	1.72	ORTHOMCL13370	1	1	1	1	0
Solyc01g005160	U-box domain-containing protein (AHRD V1 ***- D7MID4_ARALY); contains Interpro domain(s) IPR003613 U box domain	0.05	0.05	0	0.12	0	0.06	0.36	0.3	0.35	0.21	0.34	0.29	0.06	0	1.85	1.78	0.43	0.39	0.58	0.69	0	0.24	0.18	0.22	0.12	0.2	0	0	ORTHOMCL20969	1	1	0	0	0
Solyc01g005170	Clathrin assembly protein (AHRD V1 ***- B6TW95_MAIZE); contains Interpro domain(s) IPR011417 ANTH	0.21	0.14	0	0	0.16	0.24	0.33	0.41	0.19	0.1	0.81	0.61	0.71	0.32	0.84	0.7	0.97	1	1.52	2.03	1.6	1.64	0.96	1.69	2.29	1.79	0.29	0.1	ORTHOMCL20968	1	1	0	0	0
Solyc01g005180	Unknown Protein (AHRD V1)	0	0	0	0	0	0	0	0	0	0	0	0	0	0	0	0	0	0	0	0	0	0	0	0	0	0	0	0	ORTHOMCL20967	1	1	0	0	0
Solyc01g005190	Zinc finger family protein (AHRD V1 *-*- D7M6E6_ARALY); contains Interpro domain(s) IPR007087 Zinc finger, C2H2-type	0.1	0	0.23	0.24	0.11	0.11	0.36	0.24	0.14	0.14	0.33	0.29	0.23	0.23	0.46	0	0	0.22	0.61	0.27	0.31	0.32	0.35	0.33	0.57	0.13	0	0	ORTHOMCL20966	1	1	0	0	0
Solyc01g005200	Zinc finger family protein (AHRD V1 *-*- D7M6E6_ARALY); contains Interpro domain(s) IPR007087 Zinc finger, C2H2-type	0	0	0	0.11	0	0	0	0	0	0.13	0.16	0.42	0	0.11	0.15	0	0.21	0.22	0.09	0	0.45	0.15	0.17	0.11	0.22	0.12	0	0	ORTHOMCL20965	1	1	0	0	0
Solyc01g005210	Alpha alpha-trehalose-phosphate synthase (UDP-forming) (AHRD V1 **** A3CXN9_METMJ); contains Interpro domain(s) IPR001830 Glycosyl transferase, family 20	10.31	9.99	18.89	17.64	20.96	20.41	49.67	46.81	14.53	15.25	29.69	22.97	50.71	48.59	25.11	26.43	50.4	47.61	28.22	27.84	25.5	36.69	36.6	35.77	33.46	36.24	11.93	10.98	ORTHOMCL107	8	10	7	8	9
Solyc01g005220	Necrotic spotted lesions 1 (Fragment) (AHRD V1 *-*- B6ZA18_HELAN); contains Interpro domain(s) IPR001862 Membrane attack complex component/perforin/complement C9	1.76	2.22	6.48	6.67	2.67	2.89	4.85	4.98	1.35	1	4.24	3.42	4.68	5.14	19.65	16.5	13.31	13.7	12.07	12.13	0.46	0.9	0.98	1.17	0.82	0.88	0.1	0.43	ORTHOMCL5963	1	1	1	1	2
Solyc01g005230	S-adenosyl-L-methionine salicylic acid carboxyl methyltransferase (AHRD V1 **** A7XZE9_9MAGN); contains Interpro domain(s) IPR005299 SAM dependent carboxyl methyltransferase	1.04	1.87	0.68	0.55	0.81	0.68	6.65	5.94	0.09	0	0.22	0	0.07	0.15	0.5	0.17	0	0.07	0	0	0	0	0	0	0	0.08	0	0	ORTHOMCL1926	2	1	1	5	0
Solyc01g005240	Aspartokinase (AHRD V1 ***- B9RGY9_RICCO); contains Interpro domain(s) IPR001341 Aspartate kinase region	19.2	15.99	20.27	19.07	17.41	16.71	25.76	26.28	31.18	26.92	46.35	37.76	33.69	31.64	39.87	39.25	32.83	32.54	18.2	17.78	14.61	13.18	15.68	15.61	16.85	14.66	32.88	32.61	ORTHOMCL1414	1	1	3	2	3
Solyc01g005250	Aspartate-semialdehyde dehydrogenase (AHRD V1 ***- B6TWW1_MAIZE); contains Interpro domain(s) IPR005986 Aspartate-semialdehyde dehydrogenase, bacterial	23.43	22.35	25.14	25.38	24.44	24.01	34.24	33.5	82.16	81.81	104.84	90.01	112.7	107.24	69.49	72.4	65.79	65.71	112.43	123.55	13.92	16.65	21.26	23.95	21.93	21.67	26.15	27.59	ORTHOMCL10736	1	1	1	1	1
Solyc01g005260	SEC14 cytosolic factor family protein (AHRD V1 **-- D7M8H6_ARALY); contains Interpro domain(s) IPR001251 Cellular retinaldehyde-binding/triple function, C-terminal	4.31	4.25	1.88	1.56	4.62	4.88	6.65	5.62	4.26	4.32	5.21	3.97	4.23	6.3	4.26	3.72	4.67	3.37	1.23	1.21	4.54	3.81	3.77	5	3.45	3.01	4.61	6.8	ORTHOMCL10735	2	1	1	1	0
Solyc01g005270	SEC14 cytosolic factor family protein (AHRD V1 **-- D7M8H6_ARALY); contains Interpro domain(s) IPR001251 Cellular retinaldehyde-binding/triple function, C-terminal	4.47	4.2	5.61	5.52	11.84	9.15	14.61	15.71	3.39	3.64	1.34	1.38	2.07	1.66	2.55	3.3	6.33	7.37	5	3.86	10.63	14.37	11.62	12.34	8.96	6.1	9.54	7.62	ORTHOMCL10735	2	1	1	1	0
Solyc01g005280	SEC14 cytosolic factor (AHRD V1 **-- B2W8N2_PYRTR); contains Interpro domain(s) IPR001251 Cellular retinaldehyde-binding/triple function, C-terminal	6.17	6.91	4.18	4.48	9.82	7.71	1.15	0.62	3.76	2.58	5.09	4	3.45	2.88	2.49	3.17	9.24	9.82	2.74	1.9	7.07	6.91	3.35	6.41	3.72	1.63	4.91	5.53	ORTHOMCL20964	1	1	0	0	0
Solyc01g005290	SEC14 cytosolic factor family protein (AHRD V1 **-- D7M8H6_ARALY); contains Interpro domain(s) IPR001251 Cellular retinaldehyde-binding/triple function, C-terminal	4.97	6.59	3.19	2.91	14.13	12.2	2.03	1.39	1.9	1.78	2.68	1.87	2.42	2.93	3.58	2.95	19.6	17.21	49.23	43.35	2.46	3.2	9.44	17.04	30.54	24.63	1.62	5.66	NA
Solyc01g005300	Flavin-binding kelch domain F box protein (AHRD V1 **-* D7KVS5_ARALY); contains Interpro domain(s) IPR015915 Kelch-type beta propeller	1.96	2.8	9.15	9.98	84.78	87.55	63.59	62.57	33.43	35.29	30.46	27.81	109.78	103.98	69.76	74.15	79.32	76.49	56.35	58.56	131.65	124.26	73.29	75.5	54	52.94	73.53	57.19	ORTHOMCL824	2	2	3	3	3
Solyc01g005310	Dynamin like protein (AHRD V1 ***- D3BTL7_POLPA); contains Interpro domain(s) IPR001401 Dynamin, GTPase region	18.9	16.91	0.23	0.24	0	0	0.14	0	0	0.06	0	0	0	0	0.06	0	0	0	0	0	0	0	0.07	0	0	0	0	0	ORTHOMCL253	6	6	5	5	3
Solyc01g005320	Conserved membrane protein (AHRD V1 **-- D5ZCG4_MYCTU); contains Interpro domain(s) IPR010721 Protein of unknown function DUF1295	0.15	0	0	0	0.17	0	27.01	24.27	0.2	0.1	0.12	0.11	0.08	0.08	0.22	0.09	0.08	0	0	0	0.34	0	0.13	0	0	0	0.3	1.27	ORTHOMCL20963	1	1	0	0	0
Solyc01g005330	microtubule associated protein Type 1 (AHRD V1 **-* Q9C9X0_ARATH); contains Interpro domain(s) IPR009768 Myosin II heavy chain-like	30.72	28.49	19.95	19.29	38.1	36.31	43.03	41.53	53.84	51.11	36.72	32.82	30.19	31.68	36.7	39.48	18.47	18.31	13.6	13.52	32.45	30.1	17.58	17.54	5.95	5.64	33.88	37.47	ORTHOMCL752	3	3	4	1	3
Solyc01g005340	Ankyrin repeat family protein (AHRD V1 **-- Q9LVG7_ARATH); contains Interpro domain(s) IPR002110 Ankyrin	5.05	5.12	7.94	7.97	4.47	5.19	13.95	12.55	6.88	6.55	9.05	8.07	12.94	11.06	15.74	16.66	15.05	14.44	13.01	13.44	46.77	43.32	23.27	22.75	15.87	14.31	1.6	2.15	ORTHOMCL9799	1	1	1	1	1
Solyc01g005350	S-adenosyl-L-methionine salicylic acid carboxyl methyltransferase (AHRD V1 **** A7XZE9_9MAGN); contains Interpro domain(s) IPR005299 SAM dependent carboxyl methyltransferase	4.19	4.29	3.61	2.79	1.41	2.33	0.65	0.74	0.43	0.11	0.13	0.11	0.09	0	0	0.1	0	0	0	0	0.12	0	0	0	0	0	1.19	1.35	NA
Solyc01g005360	S-adenosyl-L-methionine salicylic acid carboxyl methyltransferase (AHRD V1 **** A7XZE9_9MAGN); contains Interpro domain(s) IPR005299 SAM dependent carboxyl methyltransferase	24.9	26.48	0.57	0.2	0.09	0.09	0.1	0.1	0	0	0	0	0	0	0	0	0	0	0	0	0	0	0	0	0	0	0.8	0	ORTHOMCL1926	2	1	1	5	0
Solyc01g005370	Calmodulin-2 (AHRD V1 ***- D7LFI7_ARALY); contains Interpro domain(s) IPR011992 EF-Hand type	8.93	10.93	6.32	7.05	2.3	1.38	5.42	3.75	5.49	5.56	4.05	4.62	9.08	7.44	11.06	11.36	25.08	23.7	12.12	13.28	24.32	29.55	34.38	31.15	20.04	24.71	0	0.13	NA
Solyc01g005380	SET domain containing protein (AHRD V1 ***- B6U0H4_MAIZE); contains Interpro domain(s) IPR001214 SET	3.1	3.55	4.64	4.38	6.23	6.34	5.47	5.46	8.91	8.38	12	10.04	9.53	9.43	8.46	9.73	6.88	8.76	13.53	12.54	8.53	10.64	9.47	11.15	12.38	10.95	5.76	8.3	ORTHOMCL13300	1	0	1	1	1
Solyc01g005390	Nudix hydrolase 4 (AHRD V1 ***- B6T5N7_MAIZE); contains Interpro domain(s) IPR000086 NUDIX hydrolase domain	2.06	2.11	1.27	3.19	0.55	0.14	13.39	13.66	0.34	0.34	0.82	0.36	0.42	0.28	1.31	2	1.18	1.5	1.51	1.68	0	0.19	0	0	0.14	0	1.01	0	ORTHOMCL854	3	2	4	2	2
Solyc01g005400	Calcium binding protein Caleosin (AHRD V1 **-* A8N0P5_COPC7); contains Interpro domain(s) IPR007736 Caleosin related	10.35	11.11	2.94	4.53	12.21	10.88	4.04	4.14	1.87	1.77	0.86	0.62	0.77	0.58	0.13	0.21	0.18	0.19	0.82	0.54	2.35	0.4	0.3	1.23	1.36	0.44	8.1	6.83	ORTHOMCL3699	2	1	2	1	1
Solyc01g005410	Calcium binding protein Caleosin (AHRD V1 **-* A8N0P5_COPC7); contains Interpro domain(s) IPR007736 Caleosin related	5.99	3.72	7.99	6.93	16.03	13.72	12.5	11.42	7.76	6.76	10.64	8.4	6.31	5.21	11.35	12.49	0.75	0.77	0.09	0	0.15	0.63	0	0.88	0	0	24.66	16.8	NA
Solyc01g005420	SRC2-like protein (AHRD V1 ***- A4K8J5_CAPAN); contains Interpro domain(s) IPR018029 C2 membrane targeting protein	5.47	3.91	1.44	1.98	20.82	20.14	1.73	1.98	0.72	1.31	1.22	1.07	0.36	0.24	2.23	1.71	0.34	0.12	0	0	3.53	2.31	0.18	0.58	0.24	0	23.18	15.11	NA
Solyc01g005430	UBX domain protein 6 (AHRD V1 ***- Q7SXA8_DANRE); contains Interpro domain(s) IPR018997 PUB domain	13.29	12.69	12.18	11.6	7.21	6.14	11.7	9.81	6.57	6.44	7.41	6.38	8.07	6.44	7.06	8.94	7.58	8.26	10.06	10.6	6.96	7.15	6.03	7.06	8.46	8.76	6.54	6.12	ORTHOMCL5528	1	1	1	1	2
Solyc01g005440	Jasmonate ZIM-domain protein 3 (AHRD V1 **-- B2XVS2_SOLLC); contains Interpro domain(s) IPR010399 Tify	307.1	308.78	107.12	106.89	98.14	94.5	85.49	81.18	323.32	308.99	255.42	223.39	349.39	337.65	90.3	85.14	37.31	32.22	32.66	34.64	92.78	76.61	27.43	28.45	22.25	21.98	112.46	112.45	ORTHOMCL6306	1	1	0	1	2
Solyc01g005450	F-box protein family-like protein (AHRD V1 ***- Q7EY67_ORYSJ); contains Interpro domain(s) IPR001810 Cyclin-like F-box	2.54	2.37	1.39	1.34	3.9	3.89	0	0	5.18	4.1	4.69	4.74	4.46	5.18	2.3	3.14	1.62	1.51	0.8	0.48	8.25	7.17	2.49	4.19	0.95	1.07	4.59	2.06	ORTHOMCL9801	1	1	1	1	1
Solyc01g005460	Dynein light chain 1 cytoplasmic (AHRD V1 ***- C1BWV4_ESOLU); contains Interpro domain(s) IPR001372 Dynein light chain, type 1 and 2	12.53	15.33	4.9	3.5	3.58	2.84	6.75	7.86	14.93	14.97	4.76	4.49	3.76	3.38	0.36	0.74	0.13	0.13	0	0	2.73	2.43	0.82	1.31	0	0	1.8	2.04	ORTHOMCL5859	1	1	1	1	2
Solyc01g005470	Cell number regulator 10 (AHRD V1 **-- D9HP26_MAIZE); contains Interpro domain(s) IPR006461 Protein of unknown function Cys-rich	13.88	13.27	8.34	10.76	38.96	36.53	14.89	15.42	8.52	8.95	7.71	5.87	2.74	3.81	52.42	47.17	27.41	25.2	1.62	2.1	0.71	0.73	0.2	0.76	1.44	1.33	5.4	1.81	ORTHOMCL1027	2	2	3	4	1
Solyc01g005480	Unknown Protein (AHRD V1); contains Interpro domain(s) IPR007749 Protein of unknown function DUF677	3.64	3.21	2.59	2.96	3.09	2.45	7.1	6.91	5.25	4.26	7.87	7.15	8.17	8.46	7.63	6.55	4.44	3.63	3.95	4.86	4.87	4.52	3.28	2.94	2.15	3.29	2.47	2.34	ORTHOMCL8699	1	1	2	0	1
Solyc01g005490	Iaa-amino acid hydrolase 4 (AHRD V1 ***- B9IIQ5_POPTR); contains Interpro domain(s) IPR017439 Peptidase M20D, mername-AA028/carboxypeptidase Ss1	22.29	25.05	24.03	24.58	23	24.15	26.76	26.57	18.4	16.63	16.54	13.76	14.15	12.07	21.61	23.73	28.74	28.43	17.15	15.97	28.89	32.29	36.34	31.56	32.02	32.55	13.89	13.8	ORTHOMCL1829	2	2	1	3	1
Solyc01g005500	3-phenylpropionate-dihydrodiol/cinnamic acid-dihydrodiol dehydrogenase (AHRD V1 *-*- HCAB_SHIFL); contains Interpro domain(s) IPR002347 Glucose/ribitol dehydrogenase	0.18	0.54	0.1	0.11	1.2	2.45	1.7	1.69	0	0.12	0	0	0.1	0	1.36	2.47	0.1	0	0.08	0.16	0	0.28	0	0.1	0	0.11	0	0	ORTHOMCL1307	1	4	0	5	0
Solyc01g005510	Laccase-2 (AHRD V1 **-- LAC2_ORYSJ); contains Interpro domain(s) IPR011707 Multicopper oxidase, type 3	736.49	713.92	1177.54	1158.57	0.36	0.14	2.13	2.69	1.47	1.27	0.2	0.17	3.3	4.13	1.94	1.95	0.47	0.44	0	0.07	0.06	0.13	0	0	0	0.72	0	0	ORTHOMCL505	5	6	4	1	1
Solyc01g005520	Tetratricopeptide TPR_2 repeat protein (AHRD V1 *--- A8ZVN6_DESOH); contains Interpro domain(s) IPR001478 PDZ/DHR/GLGF	36.36	44.19	74.78	75	213.44	206.63	1.64	1.64	25.65	30.21	28.57	26.61	11.96	17.07	18.97	19.05	13.72	13.25	20.45	19.33	25.2	29.96	30.04	25.98	46.6	46.6	503.65	465.55	ORTHOMCL10216	1	1	1	1	1
Solyc01g005530	Genomic DNA chromosome 3 P1 clone MRP15 (AHRD V1 ***- Q9LJE3_ARATH)	12.14	7.48	8.19	10.62	10.95	11.15	16.14	14.55	7.05	7.7	10.83	7.12	4.79	5.72	7.24	6.97	4.82	5.87	3.95	4.7	5.68	7.08	4.12	4.53	1.95	1.02	13.47	9.08	ORTHOMCL12679	1	1	1	1	0
Solyc01g005540	Lysyl-tRNA synthetase (AHRD V1 ***- B9SBP3_RICCO); contains Interpro domain(s) IPR002313 Lysyl-tRNA synthetase, class II	7.31	7.1	8.02	7.23	19.55	18.45	6.31	6.7	14.63	14.08	11.75	11.81	10.37	9.67	6.9	6.95	4.95	4.34	12.27	10.21	7.02	6.1	7.56	7.32	7.14	5.46	34.55	41.73	ORTHOMCL8812	1	1	1	1	1
Solyc01g005550	Carboxyl-terminal peptidase (AHRD V1 ***- B6U8T6_MAIZE); contains Interpro domain(s) IPR004314 Protein of unknown function DUF239, plant	52.61	54.09	60.87	59.89	57.62	61.69	73.75	70.26	87.26	84.12	62.35	51.1	41.2	36.94	32.22	31.18	15.9	15.05	11.83	10.69	26.95	22.63	7.47	8.08	5.21	4.31	36.15	48.21	ORTHOMCL1210	2	2	3	2	2
Solyc01g005560	Isocitrate dehydrogenase (AHRD V1 ***- D2D324_GOSHI); contains Interpro domain(s) IPR004790 Isocitrate dehydrogenase NADP-dependent, eukaryotic	162.54	154.57	184.69	180.92	263.63	262.48	507.87	484.18	69.57	67.89	94.64	84.88	74.36	73.64	123.37	120.68	272.31	262.9	105.93	106.9	59.03	57.92	235.29	233.59	244.57	223.51	331.29	299.13	ORTHOMCL648	3	3	3	2	4
Solyc01g005570	Unknown Protein (AHRD V1); contains Interpro domain(s) IPR012438 Protein of unknown function DUF1639	42.93	41.98	30.16	30.58	42.24	34.59	38.38	33.35	38.56	33.96	27.5	25.25	20.65	18.02	20.94	22.25	23.09	23.06	11.76	10.82	28.75	25.32	23.84	21.57	18.85	18.7	27.39	31.38	NA
Solyc01g005580	Unknown Protein (AHRD V1); contains Interpro domain(s) IPR012438 Protein of unknown function DUF1639	24.98	23.48	25.25	28.59	27.16	25.91	37.97	34.02	27.39	28.17	28.31	25.62	21.59	22.89	21.64	21.35	37.47	37.59	21.89	23.42	37.45	39.3	61.3	49.22	45.77	44.89	46.15	48.16	ORTHOMCL5678	1	1	1	2	1
Solyc01g005590	Unknown Protein (AHRD V1)	40.23	44.7	127.27	116.31	32.17	31.83	56.13	43.32	25.75	26.11	23.16	27.1	14.52	15.08	40.89	47.77	4.87	4.59	2	1.7	4.12	1.3	0.72	0.69	0.24	0	168.89	120.75	NA
Solyc01g005600	Adenosine 5&apos-phosphosulfate reductase 8 (AHRD V1 ***- Q5EUC2_MAIZE); contains Interpro domain(s) IPR017936 Thioredoxin-like	22.73	22.28	47.69	41.98	24.42	23.64	44.53	45.11	17.77	21.6	29.65	26.26	33.09	34.39	37.58	36.9	44.18	42.69	48.83	48.44	45.55	46.53	32.67	32.18	34.79	32.17	17.22	12.04	ORTHOMCL5164	1	1	2	1	1
Solyc01g005610	GDSL esterase/lipase At1g09390 (AHRD V1 ***- GDL2_ARATH); contains Interpro domain(s) IPR001087 Lipase, GDSL	0.44	0.15	0.69	0.62	0	0	0	0	0	0	0	0.11	0.08	0	0	0	0	0	0	0	0	0	0	0	0	0	0	0	ORTHOMCL20962	1	1	0	0	0
Solyc01g005620	Mitochondrial 2-oxoglutarate/malate carrier protein (AHRD V1 **** Q9FSF4_TOBAC); contains Interpro domain(s) IPR001993 Mitochondrial substrate carrier	191.01	183.92	144.55	143.29	231.39	234.31	236.1	223.95	300.42	295.76	273.08	240.16	266.12	246.87	188.28	179.41	180.22	175.26	134.92	138.13	109.83	91.98	95.87	105.14	93.36	92.54	338.83	331.65	ORTHOMCL4415	1	1	1	1	2
Solyc01g005630	Ethylene responsive transcription factor 2a (AHRD V1 *-*- C0J9I7_9ROSA); contains Interpro domain(s) IPR001471 Pathogenesis-related transcriptional factor and ERF, DNA-binding	0.12	0.25	0	0	0	0.14	15.55	10.01	0	0	0	0	0	0	0	0	0	0	0	0	0	0	0	0	0	0	0	0	ORTHOMCL3042	2	2	1	2	0
Solyc01g005640	Uncharacterized plant-specific domain TIGR01589 family protein (AHRD V1 *-*- Q60CZ4_SOLDE); contains Interpro domain(s) IPR006476 Conserved hypothetical protein CHP01589, plant	14.43	14.65	13.4	15.79	9.03	8.14	17.32	17.43	12.69	13.32	14.68	14.05	14.76	13.8	15.68	14.86	19.87	19.37	21.89	22.6	17.4	20.63	31.91	30.88	40.44	35.71	2.93	4.21	ORTHOMCL20961	1	1	0	0	0
Solyc01g005650	Ariadne-like ubiquitin ligase (AHRD V1 **-* D3AZ84_POLPA); contains Interpro domain(s) IPR002867 Zinc finger, C6HC-type	0.11	0.22	0	0	0	0	0	0	0	0	0	0	0	0	0	0	0	0	0	0	0	0	0	0	0	0	0	0	ORTHOMCL20960	1	1	0	0	0
Solyc01g005660	Myb transcription factor (AHRD V1 **-- Q6Q789_VITVI); contains Interpro domain(s) IPR015495 Myb transcription factor	0.09	0.09	0.64	0.66	0	0	0	0	0.13	0	0	0	0.11	0.11	0	0	0.1	0	0	0	1	1.32	0.81	1.34	1.06	0.36	0	0	ORTHOMCL5060	1	1	1	2	1
Solyc01g005670	Disease resistance protein (AHRD V1 ***- D1GEG2_BRARP)	2.28	2.5	2.78	3.12	2.59	2.7	4.83	4.3	2.94	2.45	3.59	2.89	3.99	3.64	4.36	5.33	3.07	3.42	2.03	2.87	5.07	6.08	4.96	4.63	4.01	4.61	2.66	2.92	ORTHOMCL15258	1	1	1	0	0
Solyc01g005680	Cytokinin riboside 5&apos;-monophosphate phosphoribohydrolase LOG (AHRD V1 **-- LOG_ORYSJ); contains Interpro domain(s) IPR005269 Conserved hypothetical protein CHP00730	0.98	0.73	0.21	0.21	4.83	7.58	10.01	9.47	0	0.25	0.15	0	0.1	0	0	0	0	0	0	0	0	0.14	0	0	0.2	0.12	2.6	0.13	ORTHOMCL14552	1	1	0	1	0
Solyc01g005690	Unknown Protein (AHRD V1)	14.47	13.01	11.6	13.65	14.56	13.82	34.42	30.04	29.12	24.35	37.05	37.42	30.68	26.19	34.96	38.05	27.94	27.12	19.96	20.11	54.14	35.34	20.88	22.28	13	10.88	31.48	25.3	ORTHOMCL8058	1	1	1	1	1
Solyc01g005700	Mutator-like transposase-like protein (AHRD V1 ***- Q9FI74_ARATH); contains Interpro domain(s) IPR004332 Transposase, MuDR, plant	4.2	4.3	5.47	4.9	3.53	3.36	5.41	4.51	5.4	6.14	6.48	5.84	5.94	5.98	5.43	6.89	3.6	4.8	4.25	4.23	7.95	8.17	6.12	6.45	4.41	4.81	3.12	5.01	ORTHOMCL11505	1	1	0	1	1
Solyc01g005710	LRR receptor-like serine/threonine-protein kinase, RLP	1.84	1.59	0.16	0.17	0.64	0.33	0	0	0	0	0	0	0.16	0.16	1.09	0.18	0.15	0.16	0.25	0	0.66	0.23	0	0	0	0	3.75	3.48	NA
Solyc01g005720	LRR receptor-like serine/threonine-protein kinase, RLP	2.29	2.9	1.58	1.3	1.05	1.52	0.74	0.6	0.05	0.11	0.13	0.17	0.18	0.18	2.69	2.71	0.84	1.26	1.66	1.43	1.51	1.55	2.72	2.74	0.8	0.56	5.25	1.85	ORTHOMCL14	23	47	0	8	0
Solyc01g005730	LRR receptor-like serine/threonine-protein kinase, RLP	3.71	3.15	3.36	2.93	3.53	4.36	1.02	0.49	0	0	0	0.05	0.14	0.07	1.11	1.28	0.38	0.32	0.92	0.9	12.8	11.29	21	21.59	7.86	6.55	18.9	13.49	ORTHOMCL14	23	47	0	8	0
Solyc01g005740	Unknown Protein (AHRD V1)	1.85	1.13	0	0	0.42	0	0	0.89	0.51	0	0	0	0	0	0	0	0.8	1.66	1.97	1.37	0	0	0	0	0	0	0	0	NA
Solyc01g005750	Lipoxygenase (AHRD V1 ***- C0KKU8_SOLLC); contains Interpro domain(s) IPR000907 Lipoxygenase	33.96	35.99	11.03	15.74	61.38	57.57	0	0	1.27	1.29	0.52	1.35	0.35	0	0	0	0	0	0	0	0	0	0	0	0.7	0	0	0.44	NA
Solyc01g005760	LRR receptor-like serine/threonine-protein kinase, RLP	4.53	4.32	6.42	8.05	3.59	3.94	5.76	4.56	0.21	0.17	1.23	0.76	1.25	1.32	14.6	16.42	8.48	7.87	14.63	13.81	4.83	6.07	9.47	9.26	2.85	2.52	1.52	0.79	ORTHOMCL14	23	47	0	8	0
Solyc01g005770	Unknown Protein (AHRD V1)	1.52	1.04	2.36	1.52	0.29	0.29	0.91	0.91	1.76	1.07	0.86	1.5	4.95	2.93	0	0.97	0	0.57	0.9	0.7	0	0	0	0	0	0.33	0	0	ORTHOMCL20959	1	1	0	0	0
Solyc01g005780	LRR receptor-like serine/threonine-protein kinase, RLP	0.92	0.76	0.22	0.18	0.29	0.56	0.27	0.31	0.1	0.05	0.13	0.33	0.47	0.17	0.11	0.24	0.16	0.12	0.16	0.07	1.49	0.77	0.26	0.12	0.21	0.24	7.74	7.94	ORTHOMCL14	23	47	0	8	0
Solyc01g005790	Pentatricopeptide repeat-containing protein (AHRD V1 ***- D7KKP4_ARALY); contains Interpro domain(s) IPR002885 Pentatricopeptide repeat	3.1	3.23	2.52	3.56	3.09	3.58	3.05	2.45	2.83	2.79	2.62	3.47	4.62	3.72	3.25	3.55	3.03	2.02	3.09	2.46	1.93	1.88	1.3	1.67	1	1.13	1.38	2.52	ORTHOMCL10816	1	1	1	1	1
Solyc01g005800	Calmodulin binding protein (AHRD V1 *--* B6U0B7_MAIZE)	1.27	0.98	0.04	0.18	0.26	0.13	2.63	2.08	0.32	0.38	0.59	0.28	0.31	0.13	1.54	1.47	1.13	0.95	0.45	0.57	0.36	0.18	0.47	0.56	0.09	0.3	0	0	ORTHOMCL623	4	4	2	2	3
Solyc01g005810	Mak16 protein (AHRD V1 *-*- Q2HUC0_MEDTR); contains Interpro domain(s) IPR006958 Mak16 protein	25.65	23.82	20.99	20.26	13.76	17.11	28.47	27.54	37.19	39.62	33.94	31.67	56.28	51.16	34.14	37.12	37.7	33.1	26.24	23.42	24.66	35.78	32.52	34.73	27.39	26.85	19.1	23.28	ORTHOMCL5858	1	1	1	2	1
Solyc01g005820	Splicing factor arginine/serine-rich 4 (AHRD V1 *--- B6U7F9_MAIZE); contains Interpro domain(s) IPR012677 Nucleotide-binding, alpha-beta plait	131.83	129.33	150.05	151.18	83.39	78.43	155.07	145.33	169.38	163.59	112.48	97.85	186.35	177.45	139.23	134.58	105.41	106.05	97.67	90.96	106.24	113.37	93.31	91.4	67.52	70.51	88.79	108.8	ORTHOMCL3757	1	1	2	1	2
Solyc01g005830	Glucan endo-1 3-beta-glucosidase 4 (AHRD V1 *-*- B6TL03_MAIZE); contains Interpro domain(s) IPR012946 X8	17.24	18.85	11.25	10.24	15.29	16.94	22.59	22.25	44.87	39.76	29.19	28.43	19.17	17.7	13.28	13.39	5.28	5.03	0.53	0.73	14.41	12.08	9.23	8.85	4.85	2.83	19.55	25.56	ORTHOMCL20958	1	1	0	0	0
Solyc01g005840	Ubiquitin-conjugating enzyme E2 E3 (AHRD V1 **** B6T544_MAIZE); contains Interpro domain(s) IPR000608 Ubiquitin-conjugating enzyme, E2	19.72	21.44	22.45	23.48	35.28	34.39	17.14	16.62	24.2	19.19	15.48	12.72	25.33	26.2	14.56	15.15	23.52	21.82	16.81	16.71	19.31	18.2	19.27	17.83	16.92	20.74	13.18	16.37	ORTHOMCL8811	1	1	1	1	1
Solyc01g005850	Extensin-like protein Dif54 (AHRD V1 *-*- Q43505_SOLLC)	0.19	0.2	0.56	0.34	0.54	0.11	27.6	24.92	0.53	0.27	0.49	0.42	0.66	0.88	0.74	0.37	0.31	0.22	0.6	0.8	0.6	0.61	0.84	0.21	0.55	0.37	0	0.42	NA
Solyc01g005860	Unknown Protein (AHRD V1)	0	0	0	0	0	0.29	0	1.21	0	0.35	0	0.37	0	1.17	0	0	0	0	0	0	0	0	0	0	0	0	0	0	NA
Solyc01g005870	LRR receptor-like serine/threonine-protein kinase, RLP	7.43	7.52	2.16	2.56	2.99	3.09	0.47	0.09	0.05	0.05	0.12	0.11	0.16	0.25	1.54	1.63	0.46	0.8	0.98	0.99	1.66	1.42	3.5	2.72	1.19	0.93	5.93	5.48	ORTHOMCL14	23	47	0	8	0
Solyc01g005880	Extensin-like protein Dif10 (Fragment) (AHRD V1 *-*- Q43504_SOLLC)	0.25	0.59	0.1	0	0	0	5.79	7.25	0	0	0	0	0	0	0	0	0	0	0	0	0	0	0	0	0	0	0	0	ORTHOMCL20957	1	1	0	0	0
Solyc01g005890	Unknown Protein (AHRD V1)	0	0	0	0	0	0	0.52	0.65	0	0	0	0	0	0	0	0	0	0	0	0	0	0	0	0	0	0	0	0	NA
Solyc01g005900	Transferase family protein (AHRD V1 **-- D7KCY6_ARALY); contains Interpro domain(s) IPR002293 Amino acid/polyamine transporter I	18.6	17.26	16.31	16.29	13.36	13.84	19.76	19.24	12.96	14.7	15.48	11.54	12.01	9.62	8.61	8.66	6.51	6.74	7.68	7.23	6.31	5.84	8.37	8.08	5.62	4.9	9.5	4.42	ORTHOMCL20956	1	1	0	0	0
Solyc01g005910	Acid phosphatase/vanadium-dependent haloperoxidase related (AHRD V1 *--- B2A528_NATTJ); contains Interpro domain(s) IPR003832 Acid phosphatase/vanadium-dependent haloperoxidase related	14.55	15.53	12.68	13.05	26.32	24.01	6.05	5.66	12.11	9.5	10.04	8.37	10.03	7.58	8.94	7.95	12.74	12.33	8.45	9.37	7.23	9.47	15.88	12.36	8.08	7.73	34.52	40.87	ORTHOMCL8829	1	1	1	1	1
Solyc01g005920	Amino acid permease (Fragment) (AHRD V1 ***- B8C3S3_THAPS); contains Interpro domain(s) IPR002293 Amino acid/polyamine transporter I	1.14	1.12	0.98	1.19	2.31	2.12	5.48	5.77	0.96	1.95	1.35	1.03	1.48	0.97	0.61	0.51	0.43	0.39	0.18	0.14	1.47	1.19	0.61	0.67	0.34	0.13	0.62	0.72	ORTHOMCL8810	2	1	1	1	0
Solyc01g005930	Unknown Protein (AHRD V1)	5.62	6.63	15.44	15.59	16.31	15.9	1.26	1.33	4.88	3.73	5.33	6.28	7.79	7.27	10.85	9.11	17.29	16.24	16.53	14.96	21.3	24.75	26.53	23.31	21.41	19.63	10.08	11.91	ORTHOMCL10221	1	1	1	1	1
Solyc01g005940	Phytoene synthase 3	0	0	0	0	0	0	0.17	0.43	0	0	0	0	0	0	0	0	0	0	0	0	0	0.11	0	0	0	0	0	0	ORTHOMCL14553	1	1	0	1	0
Solyc01g005950	Serine/threonine-protein phosphatase (AHRD V1 **** B9GY91_POPTR); contains Interpro domain(s) IPR006186 Serine/threonine-specific protein phosphatase and bis(5-nucleosyl)-tetraphosphatase	41.65	38.17	31.16	33.63	28.62	24.54	39.7	41.16	39.51	39.01	38.59	36.14	33.1	32.31	34.15	37.92	40.11	37.88	23.22	24.55	25.83	27.09	26.54	27.58	22.11	20.99	20.24	24.76	ORTHOMCL1847	2	2	2	2	1
Solyc01g005960	ATP dependent RNA helicase (AHRD V1 ***- B3LKV6_YEAS1); contains Interpro domain(s) IPR011545 DNA/RNA helicase, DEAD/DEAH box type, N-terminal	34.03	33.67	34.2	35.24	19.46	19.12	26.34	30.02	25.93	24.83	21.2	18.06	15.91	16.24	16.07	16.73	19.39	19.18	21.97	22.05	20.13	21.33	21.36	20.17	19.07	19.77	21.08	23.07	ORTHOMCL630	2	3	3	4	3
Solyc01g005970	Kelch-like protein 3 (AHRD V1 *-*- KLHL3_PONAB); contains Interpro domain(s) IPR015915 Kelch-type beta propeller	5.56	4.57	2.6	2.73	2.82	3.73	15.03	13.7	2.82	2.65	4.63	2.71	4.05	4.64	5.66	4.11	2.64	2.9	2.21	2.94	5.56	4.68	3.83	3.67	2.69	2.46	2.36	2.59	ORTHOMCL1943	2	2	1	2	2
Solyc01g005980	POT family domain containing protein expressed (AHRD V1 *-*- D8L9H8_WHEAT); contains Interpro domain(s) IPR007493 Protein of unknown function DUF538	12.92	13.39	7.61	10.1	4	3.98	10.86	10.01	8.24	9.08	11.37	8.51	8.89	6.26	4.91	5.91	1.31	1.84	0.31	0.88	7.09	7.01	4.68	5.21	0.5	0.11	4.69	3.87	ORTHOMCL14540	1	1	0	1	0
Solyc01g005990	Non-specific lipid-transfer protein (AHRD V1 *-*- B9REN2_RICCO); contains Interpro domain(s) IPR003612 Plant lipid transfer protein/seed storage/trypsin-alpha amylase inhibitor	59.35	55.88	19.24	18.29	99.05	101.17	40.33	37.85	35.1	39.62	25.44	18.55	9.68	8.96	7.93	10.84	0.37	0.38	0.08	0.31	9.97	5.93	0	0.47	0.1	0.11	64.06	79.9	ORTHOMCL11544	1	1	0	2	0
Solyc01g006000	GPI mannosyltransferase 2 (AHRD V1 **** A8N6M5_COPC7); contains Interpro domain(s) IPR007315 Mannosyltransferase, PIG-V	7.4	7.93	7.32	6.36	4.77	4.86	9.63	9.3	9.34	6.29	9.75	8.1	13.98	13.76	11.06	10.71	7.12	7.67	7.21	8.11	12.81	20.02	17.79	14.89	10.77	13.22	3.83	6.94	ORTHOMCL10785	1	1	1	1	1
Solyc01g006010	Branchpoint-bridging protein (AHRD V1 *--- C1FYD8_PARBD)	3.17	3.28	4.56	5.06	2.5	3.34	8.93	8.17	3.49	4.37	7.85	5.55	6.89	6.68	9.25	9.34	8.44	8.11	12.9	14.41	10.92	13.91	10.42	11.22	8.49	8.96	3.86	4.1	ORTHOMCL12559	1	1	1	1	0
Solyc01g006020	At3g32930-like protein (Fragment) (AHRD V1 *-*- B3SKU7_ARAHA)	22.19	24.04	19.3	20.39	133.19	127.89	13.21	15.29	51.94	54.13	51.92	42.38	76.77	73.51	31.09	33.99	34.79	31.32	22.22	21.32	106.4	122.18	85.77	87.29	36.32	38.58	117.96	113.2	ORTHOMCL8479	1	1	1	1	1
Solyc01g006030	E3 ubiquitin-protein ligase bre1 (AHRD V1 *-*- B6K254_SCHJY); contains Interpro domain(s) IPR018957 Zinc finger, C3HC4 RING-type	7.28	7.7	13.46	11.78	4.22	4.97	10.23	9.81	6.76	7.2	5.6	6.83	8.06	8.59	10.07	7.68	10.86	9.02	9.64	9.86	14.13	13.47	14.21	13.15	12.38	11.1	3.81	7.19	ORTHOMCL3759	2	2	1	1	1
Solyc01g006040	E3 ubiquitin-protein ligase BRE1-like 2 (AHRD V1 ***- BRE1B_ARATH)	4.67	4.01	6.93	7.72	3.68	4.37	8.49	8.8	5.55	5.19	7.38	6.43	7.15	6.37	8.02	8.37	8.93	9.45	8.79	8.39	9.75	11.72	12.64	10.62	9.89	7.94	4.1	3.68	ORTHOMCL3759	2	2	1	1	1
Solyc01g006050	Plant viral-response family protein (AHRD V1 **-- B6SQA7_MAIZE); contains Interpro domain(s) IPR006904 Protein of unknown function DUF716	2.64	2.89	4.14	3.53	0.07	0.14	0.66	0.37	0	0	0.1	0.09	0.14	0	0	0	0	0.07	0.05	0	0	0.1	0.11	0.41	0.21	0	0	0	ORTHOMCL3760	1	1	2	1	2
Solyc01g006060	Disease resistance response protein (AHRD V1 ***- A8IXC7_BRACM); contains Interpro domain(s) IPR004265 Plant disease resistance response protein	1.96	1.3	0.54	1.52	1.05	1.73	47.83	44.03	2.88	3.25	1.17	1.02	0.26	0.4	0	0	0	0.13	0	0	0	0.18	0	0	0	0	0.64	0	ORTHOMCL20955	1	1	0	0	0
Solyc01g006070	Plant viral-response family protein (AHRD V1 ***- B6SQA7_MAIZE); contains Interpro domain(s) IPR006904 Protein of unknown function DUF716	2.76	3.82	0.1	0	0.5	0	2.78	1.39	0	0	0	0	0.1	0	0	0	0	0	0	0	0	0	0	0	0	0	0	0.77	NA
Solyc01g006080	Protein involved in mRNA turnover and stability (ISS) (AHRD V1 ***- Q00X49_OSTTA); contains Interpro domain(s) IPR008507 Protein of unknown function DUF789	0	0	0	0.13	0	0	0	0	0.15	0	0	0	0	0	0	0	0	0	0	0	0	0	0	0	0	0	0	0	ORTHOMCL20954	1	1	0	0	0
Solyc01g006090	rRNA processing protein Ebp2 (AHRD V1 **-- B6K460_SCHJY); contains Interpro domain(s) IPR008610 Eukaryotic rRNA processing	7.03	7.68	8.83	8.12	5.22	5.41	11.34	12.68	14.55	13.84	9.98	8.45	6.21	6.34	8.58	9.86	4.38	4.72	13	11.64	4.14	4.9	4.53	3.44	1.77	1.79	12.39	9.13	ORTHOMCL4998	2	1	1	1	1
Solyc01g006100	Cytosine-specific methyltransferase (AHRD V1 *-*- B4XTS9_ELAGV); contains Interpro domain(s) IPR001525 C-5 cytosine-specific DNA methylase	6.46	5.84	1.72	1.93	1.32	1.31	4.74	4.49	12.24	12.7	3.67	3.55	1.97	2.97	0.9	1.22	0.22	0.27	0	0	0.32	0.6	0.24	0.54	0.08	0.22	7	14.64	ORTHOMCL728	3	3	3	4	1
Solyc01g006110	PP2A regulatory subunit TAP46 (AHRD V1 **-- B6TVR5_MAIZE); contains Interpro domain(s) IPR007304 TAP42-like protein	36.15	36.55	44.79	44.12	32.07	31.42	51.32	45.93	45.59	40.99	37.77	34.42	35.84	39.69	47.33	42.21	48.41	49.68	69.39	67.58	32.33	38.58	44.45	37.48	49.53	48.03	13.97	19.38	ORTHOMCL4306	1	1	1	1	2
Solyc01g006120	Casein kinase-like protein (AHRD V1 ***- Q9LID3_ARATH); contains Interpro domain(s) IPR002290 Serine/threonine protein kinase	48.14	46.79	79.79	79.47	34.73	33.9	66.94	65.01	45.53	44.04	55.84	50.95	64.31	61.89	62.11	60.07	58.6	60.41	64.33	62.15	64.58	61.92	64.17	64.66	73.64	74.41	16.14	18.4	ORTHOMCL248	5	5	4	5	6
Solyc01g006130	Homology to unknown gene (AHRD V1 *-*- Q010T6_OSTTA); contains Interpro domain(s) IPR001305 Heat shock protein DnaJ, cysteine-rich region	28.66	31.74	23.9	27.51	61.58	59	5.67	5.29	31.32	26.44	23.2	23.57	33.24	31.54	36.27	35.44	19.99	18.67	15.97	16.81	23.61	30.17	27.61	25.49	17.77	17.03	72.38	78.51	ORTHOMCL9375	1	1	1	1	1
Solyc01g006140	DNA replication factor Cdt1 (AHRD V1 *-*- CDT1_HUMAN); contains Interpro domain(s) IPR014939 DNA replication factor CDT1-like	1.41	1.44	1.45	1.84	1.33	1.21	0.48	1.16	1.12	1.76	1.02	1.61	0.14	0.56	0.62	1.03	0.13	0.41	0.43	0.45	0.13	0.06	0.07	0.09	0.23	0.21	3.94	2.16	ORTHOMCL20953	1	1	0	0	0
Solyc01g006150	Cation-efflux pump fieF (AHRD V1 ***- FIEF_KLEPN); contains Interpro domain(s) IPR002524 Cation efflux protein	19.95	20.23	20.2	20.37	28.12	27.62	7.79	7.99	25.38	23.1	19.81	16.65	15.17	16.21	11.54	9.59	3.43	2.7	13.32	12.22	8.18	6.16	12.61	12.97	6	6.78	39.09	26.96	ORTHOMCL8240	1	1	1	1	1
Solyc01g006160	Unknown Protein (AHRD V1)	227.35	220.27	187.77	195.47	117.4	110.81	282.69	265.93	525.6	513.31	298.12	265.49	352.81	345.4	273.23	280.43	239.84	245.66	184	172.12	175.95	157.33	140.83	124.38	83.91	90.51	231.59	272.29	NA
Solyc01g006170	rRNA processing protein ebna1-binding protein-related (AHRD V1 *--* C4QG91_SCHMA); contains Interpro domain(s) IPR008610 Eukaryotic rRNA processing	10.47	9.95	14.61	13.34	10.85	10.45	25.41	22.51	31.72	33	21.53	16.77	8.75	10.1	20.74	21.49	11.12	12.78	35.59	34.71	11.27	13.38	11.67	11.4	7.06	7.21	33.91	34.69	ORTHOMCL4998	2	1	1	1	1
Solyc01g006180	GTP-binding protein-like (AHRD V1 ***- Q69NK1_ORYSJ)	3.59	3.54	4.9	4.4	2.79	2.51	7.56	8.41	8.21	9.73	9.4	7.32	5.03	4.72	8.36	8.07	4.53	3.8	6.53	6.52	7.26	6.93	6.29	5.42	2.02	1.79	3.2	3.81	ORTHOMCL12403	1	1	1	1	0
Solyc01g006190	E3 ubiquitin-protein ligase sina (AHRD V1 **-* B0WR23_CULQU); contains Interpro domain(s) IPR004162 Seven in absentia protein	44.54	42.37	49.55	49.32	34.44	35.76	46.36	47.65	30.31	32.97	26.79	26.86	39.42	36.37	41.68	40.48	49.77	48.86	46.88	49.03	48.23	60.81	79.13	79.59	106.87	103.49	44.51	45.57	ORTHOMCL3501	1	1	2	2	1
Solyc01g006200	Unknown Protein (AHRD V1)	6.85	6.36	5.66	4.48	6.32	5.22	3.9	4.4	6.07	5.46	4.54	3.33	3.81	3.83	5.33	4.04	7.05	7.06	3.7	3.72	7.46	7.44	8.29	8.86	8.54	5.52	2.36	2.86	NA
Solyc01g006210	Non-structural maintenance of chromosomes element 1 homolog (AHRD V1 ***- B5X8H0_SALSA); contains Interpro domain(s) IPR011513 Nse1 non-SMC component of SMC5-6 complex	3.26	3.9	1.61	1.74	0.87	0.8	2.25	1.66	6.92	7.02	3.41	3.99	1.83	1.44	1.82	2.03	1.28	0.62	0.43	0.64	1.51	1.99	1.82	1.4	2.08	2.53	3	3.32	ORTHOMCL4402	1	1	1	1	2
Solyc01g006220	Histone-lysine N-methyltransferase (AHRD V1 *-*- C1G685_PARBD); contains Interpro domain(s) IPR001214 SET	2.12	2.99	1.41	1.75	1.31	1.92	3.39	3.02	6.92	5.31	4.27	4.46	4.74	4.77	2.33	2.37	0.88	0.79	0.72	0.89	1.1	1.21	1.86	1.13	0.46	0.46	4.64	3.65	ORTHOMCL5251	2	1	1	1	1
Solyc01g006230	Cysteine protease (AHRD V1 **** A8NLD6_COPC7); contains Interpro domain(s) IPR005078 Peptidase C54	15.72	15.89	23.3	24.21	17.11	16.75	26.44	22.8	16.27	16.29	15.03	14.95	16.2	14.95	18.61	19.19	35.75	36.59	34.31	31.71	27.44	38.04	65.5	61.31	49.85	48.68	11.37	12.73	ORTHOMCL5252	1	1	2	1	1
Solyc01g006240	Myrosinase-binding protein-like At3g16440 (AHRD V1 **-* MB32_ARATH); contains Interpro domain(s) IPR001229 Mannose-binding lectin	4.05	3.89	0.88	0.76	2.73	1.61	2.74	2.58	2.81	1.6	3.64	3.92	2.03	1.75	0.98	0.64	0	0.14	0	0	1.18	1.01	0.67	0.43	0.29	0	3.89	4.96	ORTHOMCL20952	1	1	0	0	0
Solyc01g006250	Unknown Protein (AHRD V1); contains Interpro domain(s) IPR001810 Cyclin-like F-box	3.03	4.27	1.76	3.63	5.59	3.94	2.73	1.36	3.15	1.6	2.57	1.68	2.61	2.63	2.92	1.93	1.65	3.84	1.69	2.45	10.02	15.14	6.65	7.65	6.99	5.44	1.06	0.55	ORTHOMCL20951	1	1	0	0	0
Solyc01g006260	Ribonuclease P/MRP protein subunit POP5 (AHRD V1 **** POP5_HUMAN); contains Interpro domain(s) IPR002759 Ribonuclease P-related	4.77	4.88	4.27	4.68	2.63	3.39	4.99	6.01	6.61	8.25	7.04	7.21	7.86	8.19	3.96	5.6	1.86	3.02	0.65	0.9	3.99	4.88	3.64	5.2	2.53	2.39	5.97	4.08	ORTHOMCL10948	1	1	1	1	1
Solyc01g006270	Unknown Protein (AHRD V1)	0	0	0	0	0	0	0	0	0	0	0	0	0	0	0	0	0	0	0	0	0	0	0	0	0	0	0	0	NA
Solyc01g006280	Formate-tetrahydrofolate ligase (AHRD V1 ***- D0MR27_PHYIN); contains Interpro domain(s) IPR000559 Formate-tetrahydrofolate ligase, FTHFS	37.01	37.41	97.83	98.27	69.92	72.19	85.76	83.35	61.34	59.1	86.47	76.42	108.54	104.38	73.65	73.76	87.64	89.68	63.48	63.57	62.52	65.7	83.65	84.95	253.46	258.54	45.67	37.9	ORTHOMCL10307	1	1	1	1	1
Solyc01g006290	Peroxidase (AHRD V1 **** Q42964_TOBAC); contains Interpro domain(s) IPR002016 Haem peroxidase, plant/fungal/bacterial	45.76	48.19	15.9	15.88	6.52	6.88	3.66	3.73	1.5	1.43	1.15	0.6	0	0	0.94	0.77	0.37	0.3	0.36	0.25	44.27	30.91	29.31	25.55	2.42	1.94	0	0	ORTHOMCL20950	1	1	0	0	0
Solyc01g006300	Peroxidase (AHRD V1 **** Q43774_SOLLC); contains Interpro domain(s) IPR002016 Haem peroxidase, plant/fungal/bacterial	18.91	16.12	12.74	12.13	27.8	26.49	18.5	17.57	2.28	2.12	1.16	1.62	0.39	0.08	2.43	1.74	0	0	0	0.06	0	0.11	0	1.15	0	0	3.92	3.67	ORTHOMCL14555	1	1	0	1	0
Solyc01g006310	Peroxidase (AHRD V1 ***- D7LZC8_ARALY); contains Interpro domain(s) IPR002016 Haem peroxidase, plant/fungal/bacterial	0	0	0	0	0	0	19.46	19.51	0	0	0	0	0	0	0	0	0	0	0	0	0	0	0	0	0	0	0	0	ORTHOMCL3041	2	1	1	1	2
Solyc01g006320	Non-race specific disease resistance protein 1-like protein b (AHRD V1 ***- D2CFI3_COFAR); contains Interpro domain(s) IPR010847 Harpin-induced 1	17.65	16.63	6.09	5.25	10.55	11.36	2.18	2.82	21.79	21.79	8.33	9.78	3.31	2.1	0.49	0.14	0.12	0.12	0.1	0	0	0	0	0.24	0.12	0	7.61	10.85	ORTHOMCL20949	1	1	0	0	0
Solyc01g006330	PAP fibrillin family protein (AHRD V1 *-*- B7KDB3_CYAP7); contains Interpro domain(s) IPR006843 PAP fibrillin	4.95	6	4.35	3.51	55.09	58.63	0	0	2.63	2.75	1.66	1.95	1.39	0.8	0.09	0.07	0.12	0.13	0.05	0.11	0.18	0.46	0.2	0.26	0	0.15	103.57	116.95	ORTHOMCL10293	1	1	1	1	1
Solyc01g006340	ATP dependent RNA helicase (AHRD V1 ***- B3LKV6_YEAS1); contains Interpro domain(s) IPR011545 DNA/RNA helicase, DEAD/DEAH box type, N-terminal	4.61	4.45	6.58	6.14	3.44	4.29	6.22	5.71	4.21	4.05	3.46	3.71	4.57	4.05	7.66	5.33	5.8	5.65	7.4	6.73	7.48	8.36	9.09	8.74	6.51	6.55	7.52	7.36	ORTHOMCL15410	1	1	1	0	0
Solyc01g006350	Glucan synthase like 7 (AHRD V1 ***- D8TE42_SELML); contains Interpro domain(s) IPR003440 Glycosyl transferase, family 48	16.85	16.36	16.13	16.35	14.12	13.08	33.24	31.34	23.57	23.5	27.43	22.76	32.61	30.23	36.72	34.33	30.25	30.19	26.88	25.93	33.37	34.7	29.98	30.37	27.32	25.97	19.41	16.19	ORTHOMCL54	11	9	12	12	9
Solyc01g006360	Glucan synthase like 7 (AHRD V1 ***- D8T771_SELML)	7.44	7.68	8.11	7.63	9.41	10.04	25.35	23.54	14.2	16.86	22	22.23	28.1	25.56	29.79	27.02	22.06	23.07	20.7	19.8	21.47	23.06	19.24	19.44	17.02	17.83	8.39	12.22	ORTHOMCL54	11	9	12	12	9
Solyc01g006370	Glucan synthase like 3 (AHRD V1 ***- D8R8I5_SELML); contains Interpro domain(s) IPR003440 Glycosyl transferase, family 48	22.28	21.84	14.78	15.23	12.93	12.86	34.85	33.26	68.81	65.87	80.79	71.72	78.49	75.62	35.12	36.47	11.88	11.65	12.45	13.3	20.33	15.68	7.01	7.56	5.22	5.83	11.57	15.89	ORTHOMCL54	11	9	12	12	9
Solyc01g006380	U-box domain-containing protein (AHRD V1 ***- B6V8G2_HELAN)	1.54	1.42	0.62	0.83	4.34	3.99	19.42	17.54	0.37	0.6	0.99	0.31	0.24	0.37	0	0.14	0.06	0	0.05	0	2.56	1.61	0.84	0.72	0.18	0.49	0	0.08	ORTHOMCL6327	1	2	0	1	1
Solyc01g006390	Cysteine-rich extensin-like protein-4 (AHRD V1 *-*- Q08197_TOBAC)	68.2	65.2	5.68	5.01	0	0	0.84	1.17	40.59	41.93	29.99	25.3	1.12	0.8	0	0	0	0	0.12	0	6.07	7.12	0	4.53	0	0	0	0	NA
Solyc01g006400	Cysteine-rich extensin-like protein-4 (AHRD V1 *-*- Q08197_TOBAC)	1877.62	1842.84	280.59	284.63	134.02	124.3	136.54	137.94	906.26	880.79	310.52	266.11	136.39	136.89	1.02	0.75	0.96	1.15	0.13	0.14	30.56	32.34	1.93	25.98	0	0.96	71.14	51.48	ORTHOMCL13951	1	2	0	0	0
Solyc01g006410	Cysteine-rich extensin-like protein-4 (AHRD V1 ***- Q08197_TOBAC)	0	0	0	0	0	0	0	0	0.23	0	0	0	0	0	0	0	0	0	0	0	0	0	0	0	0	0	0	0	ORTHOMCL13950	1	2	0	0	0
Solyc01g006420	Unknown Protein (AHRD V1)	0	0	0	0	0	0	0	0	0	0	0	0	0	0	0	0	0	0	0	0	0	0	0	0	0	0	0	0	NA
Solyc01g006430	Omega-6 fatty acid desaturase (AHRD V1 **** Q461Q1_HEVBR); contains Interpro domain(s) IPR005804 Fatty acid desaturase, type 1	330.98	322.49	890.04	898.82	88.9	93.71	504.53	489.61	234.22	225.39	329.53	273.94	439.85	434.49	442.16	436.18	255.83	252.18	206.74	199.5	124.14	94.38	37.02	64.31	187.79	223.53	82.85	87.68	ORTHOMCL1804	2	1	1	2	3
Solyc01g006440	Peptide transporter-like protein (AHRD V1 **-* Q9SVS9_ARATH); contains Interpro domain(s) IPR000109 TGF-beta receptor, type I/II extracellular region	8.88	9.52	0	0.11	0	0.05	0.11	0.23	0	0	0	0	0	0	0	0	0	0	0	0	0	0	0	0	0	0	0	0	ORTHOMCL452	5	5	3	3	2
Solyc01g006450	Enoyl reductase (AHRD V1 ***- P93062_BRANA); contains Interpro domain(s) IPR014358 Enoyl-[acyl-carrier-protein] reductase (NADH)	36.03	37.33	11.03	10.66	16.32	13.82	5	4.71	78.86	81.17	81.66	72.99	45.44	47.59	27.53	27.06	17.13	17.81	37.54	40.51	22.55	17.63	28.59	23.77	28.64	31.87	60.9	89.01	ORTHOMCL2584	2	2	1	1	2
Solyc01g006460	Non-structural maintenance of chromosome element 4 (AHRD V1 *--- B6K0D9_SCHJY); contains Interpro domain(s) IPR014854 Nse4	0.08	0	0	0	0	0	0	0	0	0	0	0	0	0	0	0	0	0.09	0	0	0	0	0	0	0	0	0	0	ORTHOMCL20948	1	1	0	0	0
Solyc01g006470	Bromodomain protein (AHRD V1 *-*- B9GYV6_POPTR); contains Interpro domain(s) IPR001487 Bromodomain	0	0	0	0	0	0	0	0	0	0	0	0	0	0	0	0	0	0	0	0	0	0	0	0	0	0	0	0	ORTHOMCL20947	1	1	0	0	0
Solyc01g006480	Alpha/beta hydrolase (AHRD V1 ***- Q83AV9_COXBU)	8.85	9.13	7.98	8.12	6.57	6.25	9.7	8.59	12.16	11.57	8.39	7.2	6.56	5.72	7.17	7.37	9.52	9.52	10.45	10.08	13.27	15.95	15.78	14.52	12.39	10.24	8.83	8.84	ORTHOMCL7171	1	1	1	1	1
Solyc01g006490	Protein YdiU (AHRD V1 ***- B5N5F2_SALET); contains Interpro domain(s) IPR003846 Uncharacterised protein family UPF0061	3.62	3.41	4.4	3.7	2.99	4.04	9.71	9.89	5.97	3.71	8.74	7.13	6.85	7.55	13.59	15.3	15.48	16.72	17.82	19.23	13.45	14.08	12.33	12.97	12.12	13.87	3.46	1.65	ORTHOMCL3065	2	2	1	1	1
Solyc01g006500	Pentatricopeptide repeat-containing protein (AHRD V1 ***- D7MMK8_ARALY); contains Interpro domain(s) IPR002885 Pentatricopeptide repeat	4.48	4.74	5.75	4.87	6.13	6.18	5.19	4.2	3.92	4.56	5.75	4.4	8.98	8.73	4.68	5.56	5.53	5.09	6.04	5.42	3.52	3.29	4.15	3.75	2.19	3.02	5.6	4.25	ORTHOMCL6824	1	1	1	1	1
Solyc01g006510	L-threonine 3-dehydrogenase (AHRD V1 ***- TDH_ANADF); contains Interpro domain(s) IPR002328 Alcohol dehydrogenase, zinc-containing, conserved site	35.1	32.1	44.75	43.19	68.99	76.81	30.4	29.56	38.25	34.88	41.75	35.05	65.36	63.26	67.92	67.07	83.76	83.38	33.29	31.36	68.67	62.24	54.32	51.69	31.47	29.66	40.51	35.41	ORTHOMCL6754	1	1	1	1	1
Solyc01g006520	Receptor-like protein kinase (AHRD V1 ***- Q39202_ARATH); contains Interpro domain(s) IPR002290 Serine/threonine protein kinase	0.93	0.92	1.86	2.76	4.51	4.66	1.35	1.27	0.4	0.54	1.3	1.13	0.81	0.44	2.47	2.28	0.8	0.58	0.09	0.09	2.04	1.54	0.56	0.75	0.15	0.04	2.32	2.14	ORTHOMCL300	3	3	1	11	4
Solyc01g006530	Receptor-like protein kinase (AHRD V1 ***- Q39202_ARATH); contains Interpro domain(s) IPR002290 Serine/threonine protein kinase	0	0	0	0	0	0	0	0.04	0	0	0	0	0	0	0.16	0.09	0	0	0	0	0	0	0	0	0	0	0	0	ORTHOMCL300	3	3	1	11	4
Solyc01g006540	Lipoxygenase (AHRD V1 **** Q96573_SOLLC); contains Interpro domain(s) IPR001246 Lipoxygenase, plant	32.38	31.56	31.8	34.25	17.12	17.69	0.1	0.07	12.93	15.9	34.04	28.53	9.61	10.17	5.11	4.88	90.91	87.06	302.18	295.63	300.19	340.64	1303.43	1187.71	803.26	837.06	6.38	9.07	ORTHOMCL21	17	20	6	15	12
Solyc01g006550	LRR receptor-like serine/threonine-protein kinase, RLP	0.43	0.81	1.38	1.22	1.34	2.09	1.74	0.95	0	0	0.11	0.1	0.08	0.04	2.08	1.88	0.43	0.26	0.29	0.52	4.09	3.68	5.89	6.12	2.54	1.5	2.11	1.1	ORTHOMCL14	23	47	0	8	0
Solyc01g006560	Lipoxygenase (AHRD V1 **** C0KKU8_SOLLC); contains Interpro domain(s) IPR001246 Lipoxygenase, plant	53.07	51.86	17.15	16.82	117.93	116.37	0.03	0.07	2.55	1.84	2.55	2.14	0.8	0.48	0.09	0.07	0.79	1.19	2.36	2.4	11.05	8.55	15.5	11.65	7.06	7.45	8.25	8.61	ORTHOMCL21	17	20	6	15	12
Solyc01g006570	Lipoxygenase (AHRD V1 ***- C0KKU8_SOLLC); contains Interpro domain(s) IPR013819 Lipoxygenase, C-terminal	0	0	0	0	0	0	0	0	0	0	0	0	0	0	0	0	0	0	0	0	0	0	0	0	0	0	0	0	NA
Solyc01g006580	2-oxoglutarate-dependent dioxygenase (AHRD V1 **** B9GL08_POPTR); contains Interpro domain(s) IPR005123 Oxoglutarate and iron-dependent oxygenase	0	0	0	0	0	0.07	18.85	19.53	0	0.08	0	0	0	0	0	0	0.13	0.13	0.1	0.05	0.46	0.19	0	0	0	0	0	0	ORTHOMCL20946	2	0	0	0	0
Solyc01g006590	Receptor-like protein kinase (AHRD V1 **** Q39202_ARATH); contains Interpro domain(s) IPR002290 Serine/threonine protein kinase	0	0.05	0	0	0	0	0	0	0	0	0	0.08	0	0	0	0.07	0	0	0	0	0.08	0.08	0	0	0	0	0	0	ORTHOMCL300	3	3	1	11	4
Solyc01g006600	Non-ribosomal peptide synthetase (AHRD V1 *-*- D0BWJ8_9GAMM); contains Interpro domain(s) IPR011614 Catalase, N-terminal	0	0	0	0	0	0	0	0	0	0	0	0	0	0	0	0	0	0	0	0	0.06	0.03	0	0	0.07	0.05	0	0	ORTHOMCL6329	2	1	0	1	1
Solyc01g006610	2-oxoglutarate-dependent dioxygenase (AHRD V1 **** B9GL08_POPTR); contains Interpro domain(s) IPR005123 Oxoglutarate and iron-dependent oxygenase	0	0	0	0	0	0	1.62	2.26	0	0	0	0	0	0	0	0	0	0.2	0.08	0	3.9	1.43	0.16	0.1	0.1	0	0	0	ORTHOMCL20946	2	0	0	0	0
Solyc01g006620	Phosphoribosylanthranilate transferase (Fragment) (AHRD V1 *--- Q43085_PEA); contains Interpro domain(s) IPR013583 Phosphoribosyltransferase C-terminal, plant	0	0	0	0.13	0	0.25	0.74	0.74	0	0	0	0	0	0	0	0	0	0	0	0	0	0	0	0	0.04	0	0	0	ORTHOMCL55	12	13	11	8	8
Solyc01g006630	Oxidoreductase family protein (AHRD V1 ***- D7KZW5_ARALY); contains Interpro domain(s) IPR016040 NAD(P)-binding domain	18.16	17.59	9.14	9.4	9.1	9.79	18.59	17.75	20.68	23.2	21.21	15.95	12.8	10.98	11.67	14.19	10.32	11.14	7.75	8.31	11.5	13.27	11.88	10.27	6.69	6.01	8.42	7.1	ORTHOMCL8663	1	1	1	1	1
Solyc01g006640	AMP-dependent synthetase and ligase (AHRD V1 *--- B2J012_NOSP7); contains Interpro domain(s) IPR011614 Catalase, N-terminal	0	0	0	0	0	0	0.03	0.01	0	0	0	0	0	0	0	0	0	0	0	0	0	0	0	0	0	0	0	0	ORTHOMCL6329	2	1	0	1	1
Solyc01g006650	Ethylene insensitive 3 class transcription factor (AHRD V1 *-** D5L144_MALDO); contains Interpro domain(s) IPR006957 Ethylene insensitive 3	4.56	3.83	6.21	6.59	0.54	0.8	0.98	1.65	0.36	0.18	0.07	0.13	0.25	0.3	0.33	0.6	0.42	0.34	0.46	0.2	0.33	0.89	1.21	1.25	0.2	0.39	1.14	0.87	ORTHOMCL3687	2	1	1	1	2
Solyc01g006660	Subtilisin-like serine protease (AHRD V1 **-* Q8LAE1_ARATH); contains Interpro domain(s) IPR015500 Peptidase S8, subtilisin-related	0.21	0.22	0.29	0.15	0.57	0.87	4.8	5.85	0.06	0	0	0	0	0.05	0	0	0.05	0.05	0	0	0	0	0	0	0	0	7.22	12.69	ORTHOMCL1544	3	2	2	2	1
Solyc01g006670	UDP-glucosyltransferase HvUGT5876 (AHRD V1 ***- D3WYW1_HORVD); contains Interpro domain(s) IPR002213 UDP-glucuronosyl/UDP-glucosyltransferase	0.41	0.63	0.3	0.49	2.15	1.6	4.56	3.14	1	1.15	2	0.98	3.06	2.43	4.19	5.09	7.3	6.81	6.21	5.89	19.87	21.24	17.83	20.82	13.31	10.84	1.22	0.6	ORTHOMCL433	3	4	1	5	5
Solyc01g006680	Transcription factor jumonji jmjC domain protein (AHRD V1 *-** D5NKF9_9BURK); contains Interpro domain(s) IPR003347 Transcription factor jumonji/aspartyl beta-hydroxylase	4.05	4.15	1.62	2.56	12.86	12.64	8.83	8.54	18.14	14.24	15.88	15.03	66.83	60.42	31.04	34.16	42.79	42.89	15.4	14.08	28.16	37.07	31.47	26.72	22.47	23.16	4.93	4.95	ORTHOMCL8662	1	1	1	1	1
Solyc01g006690	Unknown Protein (AHRD V1)	9.53	8.02	11.18	11.61	10.43	9.86	13.28	11.03	3.26	2.67	2.52	2.68	2.51	1.91	3.5	3.67	9.45	9.79	0.22	0.15	0.38	0.13	0	0	0	0	6.56	7.12	ORTHOMCL4460	1	2	1	1	1
Solyc01g006700	Downstream neighbor of SON (AHRD V1 *-*- Q5U2V7_RAT)	7.7	6.83	9.17	10.26	5.42	5.86	21.59	20.03	18.36	19.07	20.88	20.72	16.7	16.93	18.72	15.68	12.2	13.17	18.56	17.47	12.98	14.74	13.18	12.79	12.78	14.07	9.11	10.1	ORTHOMCL4859	1	1	1	2	1
Solyc01g006710	ATP-dependent RNA helicase A-like protein (AHRD V1 ***- Q9FF84_ARATH); contains Interpro domain(s) IPR011545 DNA/RNA helicase, DEAD/DEAH box type, N-terminal	3.26	3.79	4.52	3.68	3.7	2.77	8.92	9.47	5.04	5.37	7.46	6.97	9.46	7.93	7.86	8.8	6.12	6.6	8.25	8.49	8.25	8.93	8.58	8.85	10.68	11.99	4.23	3.92	ORTHOMCL575	4	4	4	4	0
Solyc01g006720	ABC transporter G family member 22 (AHRD V1 ***- AB22G_ARATH); contains Interpro domain(s) IPR013525 ABC-2 type transporter	11.66	11.96	25.52	25.5	34.66	34	3.3	3.08	4.25	4.26	7.75	6.7	3.35	4.23	1.03	1.52	0.19	0.2	0.34	0.13	0.44	0.96	0.43	0.08	0.53	0.28	41.22	34.77	ORTHOMCL2345	2	2	2	1	1
Solyc01g006730	Calcium dependent protein kinase 2 (AHRD V1 **** B9H9N5_POPTR); contains Interpro domain(s) IPR002290 Serine/threonine protein kinase	7.95	6.65	12.72	12.41	0.18	0.14	0.05	0.05	0.45	0.23	0.2	0.18	1.16	1.16	0.81	0.72	0.18	0.36	0	0	0	0.06	0.07	0.27	0.05	0	0	0	ORTHOMCL64	13	12	8	6	11
Solyc01g006740	Sucrose phosphate phosphatase (AHRD V1 ***- Q5J3P0_MALDO); contains Interpro domain(s) IPR012847 Sucrose phosphatase, plant and cyanobacteria	4	4.73	3.26	2.61	3.35	3.36	5.8	3.8	4.61	4.67	5.01	5.21	4.71	3.42	4.48	4.22	2.37	1.81	0.69	0.96	6.94	6.47	5.37	4.65	2.33	2.23	4.42	5.04	ORTHOMCL1213	2	2	3	2	2
Solyc01g006750	Unknown Protein (AHRD V1)	0	0.16	0	0.94	0	0.36	0	0.57	0	0.66	0	0.93	0	1.09	0	0	0	0.88	0	0	0	0	0	0	0	0	0	0	NA
Solyc01g006760	Unknown Protein (AHRD V1)	6.26	4.83	25.26	24.3	0	0	0	0	0	0	0	0	0.14	0	0	0	0	0	0	0	0	0	0	0	0	0	0	0	ORTHOMCL20945	1	1	0	0	0
Solyc01g006770	Glycoprotein-N-acetylgalactosamine 3-beta-galactosyltransferase 1 (AHRD V1 *--- C1GLT_HUMAN); contains Interpro domain(s) IPR006740 Protein of unknown function DUF604	0	0	0	0	0	0	0	0	0	0	0	0	0	0	0	0	0	0	0	0	0	0	0	0	0	0	0	0	ORTHOMCL11550	1	2	0	1	0
Solyc01g006780	Unknown Protein (AHRD V1)	0.28	0.28	0.8	0.33	0	0	0.5	0.66	0.38	0.19	0.7	0.2	0.16	0.64	0	0.35	0	0	0	0	0	0	0	0	0	0.18	0.96	1.6	NA
Solyc01g006790	Unknown Protein (AHRD V1)	45.66	39.06	61.78	59.24	8.34	7.14	31.25	28.97	5.02	3.77	3.16	3.62	5.76	4.45	3.42	2.82	0.25	0.39	0.31	0	1.27	1.3	0.61	0	0.13	0.15	12.7	9.65	ORTHOMCL12698	1	1	2	0	0
Solyc01g006800	Methionine aminopeptidase (AHRD V1 ***- B9ST99_RICCO); contains Interpro domain(s) IPR002468 Peptidase M24A, methionine aminopeptidase, subfamily 2	49.73	48.15	60.05	56.77	32.67	30.42	75.65	73.55	54.35	54.49	55.19	47.15	57.33	56.68	61.36	60.16	51.07	48.73	51.98	53.56	58.23	53.91	57.36	54.18	51.07	52.13	28.99	38.99	ORTHOMCL5250	1	1	2	1	1
Solyc01g006810	RING-H2 zinc finger protein (Fragment) (AHRD V1 *-*- A1IW10_9LAMI); contains Interpro domain(s) IPR018957 Zinc finger, C3HC4 RING-type	29.79	27.37	21.16	22.28	22.82	22.68	17.96	15.04	38.22	33.61	22.53	18.71	11.71	12.17	15.19	14.55	6.06	5.81	6.44	5.8	11.46	14.42	7.13	9.42	4.68	4.67	23.85	20.58	ORTHOMCL3036	2	2	1	1	1
Solyc01g006820	Unknown Protein (AHRD V1)	0	0	0.13	0	0	0.38	0	0.8	0	0.16	0.19	1.64	0	0.64	0	0	0	0.5	0.2	0.21	0	0	0	0	0.64	0.14	0	0	ORTHOMCL20944	1	1	0	0	0
Solyc01g006830	Os02g0200800 protein (Fragment) (AHRD V1 *-*- Q0E303_ORYSJ); contains Interpro domain(s) IPR009675 Targeting for Xklp2	40.03	38.33	22.32	26.29	139.51	135.99	44.17	44.17	111.68	110.98	90.81	73.18	52.7	56.1	52.5	52.14	37.2	39.11	37.93	40.32	36.44	37.04	37.34	33.29	25.36	24.81	99.37	83.24	ORTHOMCL13987	1	1	0	0	1
Solyc01g006840	Calcium dependent protein kinase 26 (AHRD V1 **** B9H9M4_POPTR); contains Interpro domain(s) IPR002290 Serine/threonine protein kinase	0.43	0.09	0	0	0.05	0	5.87	6.12	0.35	0.3	0	0	0	0	0	0	0	0	0	0	0	0	0	0	0	0	0.3	0.25	ORTHOMCL64	13	12	8	6	11
Solyc01g006850	Pentatricopeptide repeat-containing protein (AHRD V1 ***- D7LZQ2_ARALY); contains Interpro domain(s) IPR002885 Pentatricopeptide repeat	0.18	0.19	0.27	0.5	0.15	0.27	1.06	0.75	0.43	0.58	0.92	0.88	0.59	0.69	1.16	0.86	0.51	0.58	0.65	0.65	0.85	1.08	0.64	1.13	0.36	0.27	1.3	1.01	ORTHOMCL7422	1	1	1	1	1
Solyc01g006860	Co-chaperone HscB-like protein (AHRD V1 ***- A8IK66_CHLRE); contains Interpro domain(s) IPR001623 Heat shock protein DnaJ, N-terminal	17.51	14.29	9.64	8.48	9.09	9.26	8.66	8.25	18.62	18.41	9.73	7.59	8.74	7.71	7.93	7.22	6.24	7.44	4.4	5.81	6.33	7.36	6.68	7.11	6.16	4.88	4.29	6.01	ORTHOMCL7421	1	1	1	1	1
Solyc01g006870	cDNA clone J023119C16 full insert sequence (AHRD V1 *-*- B7F733_ORYSJ)	18.64	19.57	23.03	22.07	12.34	13	14.75	13.64	11.21	9.98	18.56	16.05	16.74	17.06	10.02	9.32	7.38	7.69	4.07	3.49	14.03	17.8	21.47	23.03	14.71	15.12	12.76	11.78	ORTHOMCL14503	1	1	0	1	0
Solyc01g006880	Histone-lysine N-methyltransferase (AHRD V1 *-*- B6JWJ3_SCHJY); contains Interpro domain(s) IPR001214 SET	4.05	4.55	3.41	3.51	3.44	3.75	6.17	6.61	4.11	4.42	6.83	5.9	10.54	9.96	6.9	7.56	9.92	10.68	10.72	10.08	8.83	15.15	14	11.9	15.69	18.3	3.86	3.22	ORTHOMCL6931	1	1	1	1	1
Solyc01g006890	Genomic DNA chromosome 5 P1 clone MUK11 (AHRD V1 ***- Q9FMC4_ARATH)	8.39	7.55	5.92	4.68	4.85	4.94	12.79	10.55	12.71	12.5	15.52	11.83	4.83	5.06	4.1	3.99	1.72	1.52	0.78	0.56	5.13	2.85	1.77	1.93	1.01	1.1	6.72	5.81	ORTHOMCL1806	3	3	1	1	1
Solyc01g006900	Phosphatidylglycerol/phosphatidylinositol transfer protein (AHRD V1 -**- C5M4H0_CANTT); contains Interpro domain(s) IPR003172 MD-2-related lipid-recognition	321.39	311.99	241.66	233.68	119.55	118.07	314.53	305.32	868.53	848.31	434.25	389.86	290.07	280.97	209.29	211.58	168.43	165.08	131.3	135.29	352.15	337.17	227.84	282.57	123.79	109.99	125.63	126.14	ORTHOMCL1394	2	2	2	2	2
Solyc01g006910	Ring finger protein (AHRD V1 *-*- O49869_HORVU); contains Interpro domain(s) IPR018957 Zinc finger, C3HC4 RING-type	0	0.12	0	0	0.77	0.26	0.82	0.82	0	0	0	0	0	0	0	0	0	0	0	0	0	0	0	0	0	0	1.11	1.31	ORTHOMCL15459	1	1	1	0	0
Solyc01g006920	Pentatricopeptide repeat-containing protein (AHRD V1 ***- D7KZF9_ARALY); contains Interpro domain(s) IPR002885 Pentatricopeptide repeat	0.26	0.2	0.15	0.27	0.26	0.22	0.58	0.5	0.45	0.32	0.55	0.43	0.74	0.97	0.55	0.86	0.42	0.44	0.29	0.63	0.7	1.39	0.85	0.58	0.52	0.38	0.41	0.94	ORTHOMCL7523	1	1	1	1	1
Solyc01g006930	Nuclear transcription factor Y subunit A-2 (AHRD V1 **** B6SM21_MAIZE); contains Interpro domain(s) IPR001289 CCAAT-binding transcription factor, subunit B	3.25	4.21	5.04	4.6	6.38	5.56	57.27	53.62	3.98	3.5	7.52	8.39	7.39	8.63	36.54	34.64	16.16	16.5	8	7.96	11.19	11.41	7.31	6.49	1.5	1.76	0.53	0.94	ORTHOMCL3424	1	1	2	1	2
Solyc01g006940	Poly(U)-binding-splicing factor PUF60 (AHRD V1 *--* PUF60_BOVIN); contains Interpro domain(s) IPR003954 RNA recognition, region 1	45.41	42.18	24.52	24.83	87.43	81.59	5.01	4.2	62.46	55.75	47.45	44.4	45.83	45.72	25.84	27.24	19.01	18.47	16.3	16.62	34.54	35.6	26.1	26.64	8.84	8.43	133.52	126.63	ORTHOMCL8342	1	1	1	1	1
Solyc01g006950	Syntaxin (AHRD V1 ***- Q6X9V9_HORVD); contains Interpro domain(s) IPR010989 t-SNARE	0.33	0.08	1.62	2.06	1.3	1.14	15.55	17.4	1.02	1.73	1.53	1.21	0.47	0.19	13.14	10.22	0.44	0.55	1.09	1.29	0.38	0.52	0.14	0.18	0.47	0.11	0.8	0	ORTHOMCL20943	1	1	0	0	0
Solyc01g006960	Transport protein particle subunit trs85-2 (AHRD V1 *--- TR852_SCHPO)	6.81	6.05	5.41	5.01	6.7	5.83	17.32	17.22	10.97	11.32	15.17	12.91	18.32	18.25	16.58	15.9	12.2	12.03	10.87	11.09	13.54	13.47	12.4	14.73	11.63	11.3	3.89	3.02	ORTHOMCL4438	1	1	1	2	1
Solyc01g006970	ATP-dependent RNA helicase A-like protein (AHRD V1 ***- Q9FF84_ARATH); contains Interpro domain(s) IPR007502 Helicase-associated region	6.72	6.2	5.93	7.31	5.34	5.47	11.07	11.73	9.21	7.89	9.47	9.88	17.87	18.6	14.44	13.57	16	14.61	13.55	12.95	13.72	18.33	18.15	18.22	12.52	14.96	4.93	5.12	ORTHOMCL575	4	4	4	4	0
Solyc01g006980	Malonyl CoA-acyl carrier protein transacylase containing protein expressed (AHRD V1 ***- Q10MS3_ORYSJ); contains Interpro domain(s) IPR004410 Malonyl CoA-acyl carrier protein transacylase	30.12	28.47	14.5	12.32	18.52	18.49	20.79	20.7	57.75	55.64	74.05	60	46.55	43.44	26.26	23.96	19.92	17.57	10.8	10.52	32.24	32.26	41.25	37.52	25.59	25.26	33.88	45.55	ORTHOMCL9466	1	1	1	1	1
Solyc01g006990	F-box family protein (AHRD V1 ***- D7KNJ0_ARALY); contains Interpro domain(s) IPR001810 Cyclin-like F-box	17.6	12.7	12.81	12.6	8.46	9.17	13.59	13.94	15.57	15.23	20.14	15.59	18.98	16.87	13.99	13.39	16.05	15.49	19.32	16.99	17.52	14.29	13.69	14.11	13.95	13.78	5.08	3.94	ORTHOMCL5856	1	1	2	1	1
Solyc01g007000	U-box domain-containing protein (AHRD V1 ***- D7LU64_ARALY); contains Interpro domain(s) IPR003613 U box domain	0.06	0.06	0	0.07	1.34	1	2.24	2.9	1.46	1.31	0.32	0.18	0	0.07	1.15	0.95	0.27	0.07	0.06	0.17	0	0	0	0	0.14	0	0	0	ORTHOMCL721	3	4	2	2	3
Solyc01g007010	U-box domain-containing protein (AHRD V1 ***- D7LU64_ARALY); contains Interpro domain(s) IPR003613 U box domain	0.06	0.13	0	0.08	6.69	6.88	4.67	5.79	1.39	1.41	0.53	0.56	0.22	0.14	0.87	0.56	0.14	0.21	0.06	0.06	0	0	0	0.07	0	0	0	0	ORTHOMCL721	3	4	2	2	3
Solyc01g007020	U-box domain-containing protein (AHRD V1 ***- D7LU64_ARALY); contains Interpro domain(s) IPR003613 U box domain	0.17	0.06	0.07	0.07	8.84	9.78	6.78	6.84	0.55	0.56	0.48	0.25	0	0.2	1.48	1.58	0.49	0.32	0.45	0.63	0	0	0	0	0	0	0.08	0.65	ORTHOMCL721	3	4	2	2	3
Solyc01g007030	U-box domain-containing protein (AHRD V1 ***- D7LU64_ARALY); contains Interpro domain(s) IPR016024 Armadillo-type fold	0.06	0.06	0	0.14	1.45	1.35	2.45	2.3	0.73	0.57	0.3	0.17	0	0.07	0.36	0.52	0.25	0.13	0.05	0.16	0	0	0	0	0.07	0	0	0	ORTHOMCL13949	1	2	0	0	0
Solyc01g007040	U-box domain-containing protein (AHRD V1 ***- D7LU64_ARALY); contains Interpro domain(s) IPR003613 U box domain	0	0.08	0	0	3.19	2.14	7.53	8	1.9	1.02	0.68	1.19	0	0.28	2.11	1.74	0.26	0.54	0.14	0.3	0.12	0	0	0.09	0.28	0.1	0	0.47	NA
Solyc01g007050	U-box domain-containing protein 24 (AHRD V1 ***- D7LAS1_ARALY); contains Interpro domain(s) IPR003613 U box domain	0	0	0	0	0.08	0.08	0.08	0	0.37	0.09	0.11	0.4	0.08	0.08	0.31	0	0	0	0	0	0.31	0.11	0	0.53	0	0	0	0	ORTHOMCL14282	1	1	0	1	0
Solyc01g007060	At5g63850 (Fragment) (AHRD V1 *-*- Q3YIL4_ARATH)	5.16	6.45	6.45	5.92	5.79	5.96	10.77	9.51	7.31	5.58	7	4.49	5.8	6.46	5.95	6.01	6.67	7.09	8.36	7.74	7.69	7.98	8.01	9.38	6.26	5.31	5.31	10.09	ORTHOMCL8984	1	1	1	1	1
Solyc01g007070	BEL1-like homeodomain protein 1 (AHRD V1 **-- BLH1_ARATH); contains Interpro domain(s) IPR006563 POX	30.75	29.13	68.07	65.84	15.62	16.51	48.88	46	65.78	63.48	125.1	110.39	178.52	171.83	132.74	132.67	155.9	152.02	95.23	95.81	414.34	356.89	188.3	195.15	198.77	198.79	2.82	2.88	ORTHOMCL9355	1	1	1	2	0
Solyc01g007080	Aluminum-activated malate transporter (Fragment) (AHRD V1 *--* Q071L4_AVESA); contains Interpro domain(s) IPR006214 Uncharacterised protein family UPF0005	0.58	0.59	0.27	0.07	0	0.07	0	0	0	0	0	0	0	0	0	0	0	0	0	0	0	0	0	0	0	0	0.4	0	ORTHOMCL20942	1	1	0	0	0
Solyc01g007090	Aluminum-activated malate transporter (Fragment) (AHRD V1 *--* Q07DQ0_WHEAT); contains Interpro domain(s) IPR006214 Uncharacterised protein family UPF0005	0	0.05	0.05	0	0	0	0	0	0	0	0	0	0	0	0	0	0	0	0	0	0	0	0	0	0	0	0	0.07	ORTHOMCL13948	1	2	0	0	0
Solyc01g007100	Digalactosyldiacylglycerol synthase 1, chloroplastic (AHRD V1 ***- DGDG1_LOTJA); contains Interpro domain(s) IPR001296 Glycosyl transferase, group 1	10.75	9.03	19.67	16.31	29.57	28.66	2.73	2.08	6.36	5.64	9.64	8.16	5.8	5.88	5.36	8.24	1.2	1.56	6.5	6.4	10.42	10.7	5.43	4.57	3.61	2.55	28.23	31.44	ORTHOMCL2415	2	2	1	1	2
Solyc01g007110	NC domain-containing protein (AHRD V1 **-- D7LZP9_ARALY); contains Interpro domain(s) IPR007053 NC	63.59	66	94.66	92.87	23.35	20.57	40.63	40.57	52.49	48.53	46.03	41.46	69.3	67.14	86.74	91.88	67.57	71.99	143	138.01	58	46.49	45.62	49.45	45.05	37.33	15.12	12.68	ORTHOMCL12182	1	1	1	1	0
Solyc01g007120	Serine/threonine protein kinase (AHRD V1 **** Q2U6C8_ASPOR); contains Interpro domain(s) IPR000687 RIO kinase	10.5	11.36	13.82	12.9	10.81	10.21	17.31	14.74	14.17	15.08	12.95	10.39	9.83	8.98	15.89	15.52	12.95	13.05	16.8	17.97	17.82	19.27	18.49	19.3	14.8	12.48	14.58	16.42	ORTHOMCL8368	1	1	1	1	1
Solyc01g007130	Receptor like kinase, RLK	3.37	3.37	5.08	4.55	3.59	3.38	28.45	27.01	3.31	2.84	4.87	3.2	3.5	3.57	9.24	8.46	1.67	0.99	0.76	0.61	14.51	14.13	9.45	8.85	3.06	2.41	4.01	3.96	ORTHOMCL209	8	7	4	6	3
Solyc01g007140	Pre-rRNA-processing protein ipi1 (AHRD V1 *--- B6K6C3_SCHJY); contains Interpro domain(s) IPR016024 Armadillo-type fold	1.93	1.94	1.79	1.7	1.71	1.77	4.36	4.35	3.1	2.63	3.07	2.84	2.15	2.39	3.36	2.45	1.42	1.22	3.03	3.67	4.43	5.26	3.33	4.79	1.99	1.71	1.17	2.1	ORTHOMCL4510	1	1	2	1	1
Solyc01g007150	Coatomer subunit beta-1 (AHRD V1 ***- D7MB61_ARALY); contains Interpro domain(s) IPR016460 Coatomer, beta subunit	25.49	23.94	18.83	19.14	15.51	15.25	45.48	43.61	47.94	50.25	71.85	61.55	64.7	61.91	65.94	63.22	42.51	43.12	36.9	38.06	42.77	42.61	39.75	39.28	33.89	32.41	26.56	25.33	ORTHOMCL1721	2	2	2	2	1
Solyc01g007160	N-acetyltransferase ESCO1 (AHRD V1 **-- B6TTW6_MAIZE); contains Interpro domain(s) IPR001126 DNA-repair protein, UmuC-like	1.98	1.65	0.51	0.53	0.42	0.25	1.14	1.41	4.37	3.19	2.23	1.84	0.34	0.34	0.68	0.65	0.32	0	0	0.27	0	0.82	0	0.16	0	0	0.72	2.55	ORTHOMCL3148	1	1	1	2	2
Solyc01g007170	Protein unc-13 homolog C (AHRD V1 *--- UN13C_RAT); contains Interpro domain(s) IPR013583 Phosphoribosyltransferase C-terminal, plant	0.53	0.9	0.24	0.07	0.3	0.24	4.54	4.18	1.5	1.44	0.65	0.35	0.13	0.1	0	0.11	0	0.03	0	0	0.59	0.84	0.36	0.49	0.1	0.08	1.23	1.87	ORTHOMCL642	3	4	3	3	2
Solyc01g007180	Unknown Protein (AHRD V1)	4.53	5.49	4.41	4.53	3.7	4.01	4.67	4.67	3.65	5.18	4.28	4.35	8.21	5.71	5.19	7.89	7.99	8.63	6.55	5.84	4.74	6.38	4.8	6.37	9.09	6.03	3.38	2.59	ORTHOMCL9829	1	1	2	1	0
Solyc01g007190	Unknown Protein (AHRD V1)	2.36	1.85	3.11	2.64	0.71	1.64	4.16	4.62	0.65	0.55	2.53	2.44	6.96	7.18	4.73	3.4	5.13	4.78	8.05	7.71	6.85	5.66	3.04	2.47	4.62	2.56	0.11	0	ORTHOMCL20941	2	0	0	0	0
Solyc01g007200	Unknown Protein (AHRD V1)	6.67	6.74	5.42	4.14	0.18	0.46	0.48	0.19	1	0.68	0.41	0.24	0.28	0.56	0	0	0	0.09	0.07	0	2.62	2.31	2.4	2.43	3.15	3.04	0	0.35	NA
Solyc01g007210	Unknown Protein (AHRD V1)	43.2	42.92	105.04	102.38	0	0	0.25	0	0.29	0	0	0	0.48	0.24	0	1.06	0	0	0	0	0	0	0	0	0.96	0.54	0	0	NA
Solyc01g007220	NHL1 (Fragment) (AHRD V1 **-- B0LZM3_ARATH); contains Interpro domain(s) IPR010847 Harpin-induced 1	73.83	73.8	101.76	97.92	45.92	48.07	389.43	379.79	37.29	34.65	122.69	117.59	342.6	331.03	502.39	505.24	356.4	375.62	87.16	82.96	676.79	607.31	358.5	371.11	97.84	97.63	11.39	6.96	ORTHOMCL20940	1	1	0	0	0
Solyc01g007230	Harpin-induced protein-like (Fragment) (AHRD V1 *--- D2CFH8_COFAR); contains Interpro domain(s) IPR010847 Harpin-induced 1	14.76	16.3	11.48	10.65	11.19	10.72	17.6	15.82	10.7	9.48	13.57	12.54	6.51	7.9	13.1	12.31	18.99	18.9	11.83	13.1	11.85	7.96	11.31	10.4	9.35	9.55	5.45	11.34	ORTHOMCL20939	1	1	0	0	0
Solyc01g007240	NHL3 (Fragment) (AHRD V1 **-- B0ZVP8_ARATH); contains Interpro domain(s) IPR010847 Harpin-induced 1	13.05	13.22	40.45	37.61	0	0	0.15	0	0	0	0	0	0.29	0.29	0	0.16	0	0	0	0	0	0	0	0	0	0	0	0	ORTHOMCL20938	1	1	0	0	0
Solyc01g007250	U3 small nucleolar ribonucleoprotein protein IMP4 (AHRD V1 ***- D0N3A6_PHYIN); contains Interpro domain(s) IPR007109 Brix domain	8.13	8.06	9.16	9.43	6.54	6.59	20.33	16.66	14.01	16.82	13.86	11.07	11.95	11.03	14.72	15.14	11.64	11.08	15.72	16.68	17.25	22.97	17.07	12.99	10.93	13.09	13.15	10.52	ORTHOMCL10134	1	1	1	1	1
Solyc01g007260	Os04g0416500 protein (Fragment) (AHRD V1 ***- Q0JDA8_ORYSJ); contains Interpro domain(s) IPR004176 Clp, N-terminal	1.06	1.18	0.75	0.81	0.77	1.3	10.65	10.94	0.4	0.23	0.54	0.62	0.59	0.48	0.1	0.12	0.1	0.04	0.06	0.12	0.85	1.03	0.51	0.68	0.52	0.46	0.54	0.89	ORTHOMCL2344	2	2	1	2	1
Solyc01g007270	Cytokinin riboside 5&apos;-monophosphate phosphoribohydrolase LOG (AHRD V1 **-- LOG_ORYSJ)	0	0	0	0	0	0	0	0	0	0	0.68	0	0	0	0	0	0	0	0	0	0	0	0	0	0	0	0	0	ORTHOMCL20937	1	1	0	0	0
Solyc01g007280	30S ribosomal protein S4 chloroplastic (AHRD V1 ***- B5MF80_PETIN); contains Interpro domain(s) IPR005709 Ribosomal protein S4, bacterial-type	0.18	0.54	0.41	0.32	1.2	0.41	0.42	0.32	0.85	1.11	2.09	1.43	0.81	1.62	0.14	0.56	0.29	0.49	0.55	0.65	2.19	1.55	1.7	1.68	0.81	0.57	5.28	2.81	ORTHOMCL11722	1	1	0	2	0
Solyc01g007290	NAD(P)H-quinone oxidoreductase subunit J (AHRD V1 ***- NDHJ_TRIEI); contains Interpro domain(s) IPR020396 NADH:ubiquinone oxidoreductase, 30 kDa subunit, conserved site IPR001268 NADH:ubiquinone oxidoreductase, 30 kDa subunit	0	0.18	0.62	0.86	4.46	4.34	0.43	0.21	0.74	0.5	2.12	3.69	0.82	1.24	0.83	1.14	0.19	0.2	0.32	1.32	1.95	3.71	0.94	1.6	0	0.47	10.23	12.97	ORTHOMCL14813	1	1	0	1	0
Solyc01g007300	NAD(P)H-quinone oxidoreductase subunit K chloroplastic (AHRD V1 ***- D3WB90_9BORA); contains Interpro domain(s) IPR006138 NADH:ubiquinone oxidoreductase, 20 kDa subunit	0.88	1.03	1.46	1.05	7.13	8.87	0.3	0.75	1.22	0.35	3.62	3.9	3.18	2.62	2.13	1.44	1.09	0.71	2.24	1.63	3.13	2.61	2.21	1.55	0.72	0.49	12.29	10.04	ORTHOMCL11373	1	1	0	0	2
Solyc01g007310	NAD(P)H-quinone oxidoreductase subunit 3 (AHRD V1 ***- D3WDC8_BULAR); contains Interpro domain(s) IPR000440 NADH:ubiquinone/plastoquinone oxidoreductase, chain 3	1.78	0.91	3.36	2.93	11.09	9.75	0.27	0.53	0.31	1.56	2.26	1.64	1.27	2.05	2.4	1.13	0	0.25	1.98	2.47	3.45	1.06	1.95	2.49	1.79	0.29	4.96	10.95	ORTHOMCL11680	1	1	0	1	1
Solyc01g007320	ATP synthase subunit beta chloroplastic (AHRD V1 ***- Q8MBF8_9SOLA); contains Interpro domain(s) IPR005722 ATPase, F1 complex, beta subunit	30.77	29.3	82.86	77.49	296.71	292.55	48.27	45.81	91.49	89.17	473.85	421.45	472.36	446.32	201.94	191.48	120.39	124.58	114	113.79	169.37	151.06	141.17	158.5	70.71	70.83	1687.8	1598.58	ORTHOMCL13982	1	1	0	0	1
Solyc01g007330	Ribulose bisphosphate carboxylase large chain (AHRD V1 ***- RBL_SOLLC); contains Interpro domain(s) IPR000685 Ribulose bisphosphate carboxylase, large subunit, C-terminal	18.22	17.88	19.62	17.93	68.45	65.76	2.94	2.94	17.05	15.72	69.91	58.43	72.4	74.98	5.77	6	2.16	2.08	38.49	38.03	6.82	4.36	4.05	4.71	4.95	6.69	49.21	42.49	ORTHOMCL5500	1	1	1	1	2
Solyc01g007340	Acetyl-coenzyme A carboxylase carboxyl transferase subunit beta (AHRD V1 ***- ACCD_EPIVI); contains Interpro domain(s) IPR000438 Acetyl-CoA carboxylase carboxyl transferase, beta subunit	0.49	0.32	0.41	0.32	0.25	0.46	0.8	0.85	0.31	0.38	2.19	1.38	1.58	1.54	0.27	0.34	0.29	0	2.89	3.54	0.35	0.21	0.47	0.3	0.67	0.41	0.12	0.19	ORTHOMCL11670	1	1	0	2	0
Solyc01g007350	Photosystem I reaction center subunit VIII (AHRD V1 *-*- Q3V525_ACOCL); contains Interpro domain(s) IPR001302 Photosystem I reaction centre, subunit VIII	1.45	0.89	0.84	0.87	2.63	1.51	0.7	0.7	0.6	0.61	4.67	2.57	3.5	3.52	0.89	0.18	0.63	0.49	1.42	2.15	1.58	0.46	1.78	1.46	0.67	0.76	1.82	1.89	ORTHOMCL11527	2	1	0	1	0
Solyc01g007360	Photosystem I assembly protein ycf4 (AHRD V1 ***- Q06R54_9LAMI); contains Interpro domain(s) IPR003359 Photosystem I assembly Ycf4	0.61	0.46	0.18	0.54	1.37	1.05	0.36	0.36	0.63	1.28	4.36	2.45	1.74	1.75	0	0.58	0.66	0.17	2.15	2.8	0.47	0.72	1.33	0.51	0.7	0.99	2.53	0	ORTHOMCL11526	1	1	0	1	1
Solyc01g007370	Chloroplast envelope membrane protein A (AHRD V1 ***- D7KRA3_ARALY); contains Interpro domain(s) IPR004282 CemA	0.92	0.35	0.54	0.55	2.23	1.6	0.55	0.28	1.28	1.46	4.3	4.09	3.97	4	2.14	1.03	0.63	0.26	1.75	1.71	2.69	1.11	1.82	2.2	1.06	0.75	3.71	1.34	ORTHOMCL4195	1	1	0	4	0
Solyc01g007380	Apocytochrome f (AHRD V1 ***- D3WBH0_9AQUA); contains Interpro domain(s) IPR002325 Cytochrome f	0.62	0.73	0.41	0.42	1.51	2.35	0.96	0.42	1.11	0.5	4.05	3.53	4.17	4.09	1.09	1.13	0.29	1	1.73	3.19	1.65	2.12	1.24	1.99	1.02	0.58	3.34	1.41	ORTHOMCL11434	1	1	0	1	1
Solyc01g007390	Unknown Protein (AHRD V1)	0	0.97	0	0	1.07	1.09	2.28	3.41	0	0	4.82	2.8	0	0	0	1.21	0	0	0	1.75	2.95	0	0	1.06	1.09	0	0	0	ORTHOMCL13947	1	2	0	0	0
Solyc01g007400	Unknown Protein (AHRD V1); contains Interpro domain(s) IPR002682 Photosystem II protein PsbJ	14.23	15.94	16.54	11.35	38.39	37.54	7.32	6.5	23.47	19.99	26.38	23.97	21.76	28.15	11.48	17.23	6.62	12.18	18.07	18.78	30.52	41.1	35.63	29.59	17.94	13.24	26.46	51.05	NA
Solyc01g007410	Cytochrome b559 subunit alpha (AHRD V1 *-*- D4PBC8_PHODC); contains Interpro domain(s) IPR006217 Photosystem II protein cytochrome b559, alpha subunit	28.45	38.61	23.63	33.35	72.4	87.14	11.15	10.44	44.26	32.63	43.26	32.53	43.96	38.2	24.15	36.17	13.86	13.05	24.27	22	41.49	36.15	37.66	30.57	13.37	21.18	51.02	47.13	ORTHOMCL21935	1	0	0	1	0
Solyc01g007420	Cytochrome b6-f complex subunit 6 (AHRD V1 *-*- Q5K3U2_9MAGN); contains Interpro domain(s) IPR007802 Cytochrome b6/f complex subunit VI	0.39	0.8	0.91	0.93	3.98	2.7	0	0.47	2.7	1.64	4.62	5.17	1.34	4.5	0	0	0.42	0	0.35	0.36	0.61	1.24	0	1.31	0	1.52	3.81	6.21	ORTHOMCL13946	1	2	0	0	0
Solyc01g007430	Cytochrome b6-f complex subunit 5 (AHRD V1 ***- B7T2X6_EROTE); contains Interpro domain(s) IPR003683 Cytochrome b6/f complex, subunit 5	0	0.31	1.4	1.44	1.71	2.79	0	0.36	1.25	2.12	3.57	3.11	3.11	5.92	0.93	0.38	0.65	0.34	1.61	2.79	2.81	1.93	0.53	2.36	3.47	1.96	5.89	4.81	ORTHOMCL21774	1	0	0	1	0
Solyc01g007440	Photosystem I reaction center subunit IX (AHRD V1 ***- Q06R45_9LAMI); contains Interpro domain(s) IPR002615 Photosystem I reaction centre, subunit IX / PsaJ	19.79	23.41	16.54	30.34	100.96	107.11	5.2	1.48	12.86	9.56	23.04	17.33	34.77	24.27	18.1	18.87	6.71	7.65	14.85	12	26.9	28.64	24.94	21.48	14.25	13.7	94.9	139.84	ORTHOMCL2907	3	3	0	1	0
Solyc01g007450	50S ribosomal protein L33 chloroplastic (AHRD V1 ***- D3WBK4_9AQUA); contains Interpro domain(s) IPR001705 Ribosomal protein L33	0.85	1.3	1.48	1.52	14.92	10.3	1.02	0.51	2.94	5.37	5.75	7.51	1.95	3.92	1.31	0.54	1.84	0.95	2.64	5.1	1.98	2.03	1.49	2.38	2.45	1.11	7.7	0.62	ORTHOMCL4158	2	3	0	1	0
Solyc01g007460	30S ribosomal protein S18 chloroplastic (AHRD V1 ***- D3WEG6_HEUSA); contains Interpro domain(s) IPR001648 Ribosomal protein S18	0.83	0.85	0.32	0.33	7.85	6.4	0.67	0.33	3.46	2.34	2.35	3.68	2.54	4.16	0.85	2.82	1.2	1.25	0.49	1.02	1.72	1.77	2.43	1.86	1.28	0	2.71	4.42	ORTHOMCL6290	1	3	0	1	0
Solyc01g007470	50S ribosomal protein L20 chloroplastic (AHRD V1 ***- Q06R42_9LAMI); contains Interpro domain(s) IPR005813 Ribosomal protein L20	2.21	2.48	2.05	1.06	4.25	3.56	1.32	0.53	2.75	4.03	7.84	5.53	6.07	3.82	1.7	1.4	1.2	0.74	1.57	3.47	3.08	2.11	3.09	3.46	1.27	1.15	4.92	3.2	ORTHOMCL6289	1	3	0	1	0
Solyc01g007480	Ribosomal protein S12 (Fragment) (AHRD V1 *-*- B0LN88_LYCCH)	0.35	0.36	0.41	0	0	0.41	0	0	0	0.49	0	0.52	0	0.41	0	0	0.38	0.39	0	0	0	0	0	0.39	0	0	0	0	NA
Solyc01g007490	ATP-dependent Clp protease proteolytic subunit (AHRD V1 ***- D3WCC1_NEROL); contains Interpro domain(s) IPR001907 Peptidase S14, ClpP	12.18	12.82	23.55	22.14	35.17	40.82	37.24	39.58	19.96	21.22	45.99	40.92	29.55	32.43	29.22	27.39	15.25	16.19	15.41	16.12	32.01	26.36	21.76	18.49	10.92	10.37	135.38	135.92	ORTHOMCL11684	1	1	0	1	1
Solyc01g007500	Photosystem II CP47 chlorophyll apoprotein (AHRD V1 ***- D3WBA3_9BORA); contains Interpro domain(s) IPR017486 Photosystem II, PsbB	5.47	5.22	4.97	6.49	15.62	13.84	0.17	0.17	4.84	4.91	19.91	16.6	24.61	25.98	2.19	1.93	0.7	0.41	1.59	1.87	2.57	2.86	1.45	1.75	0.79	1.38	12.37	8.06	ORTHOMCL11438	1	1	0	1	1
Solyc01g007510	PsbN (AHRD V1 ***- Q7HIW7_ARATH); contains Interpro domain(s) IPR003398 Photosystem II protein PsbN	0	0	0	0	0	0	0	0	0	0	0	0	0	0	0	0	0	0	0	0	0	0	0	0	0	0	0	0	ORTHOMCL14355	1	1	0	1	0
Solyc01g007520	Photosystem II reaction center protein H (AHRD V1 ***- C6JT33_9MYRT); contains Interpro domain(s) IPR001056 Photosystem II phosphoprotein PsbH	0.96	0.49	0.7	0.14	0.95	2.22	0	0.43	0.83	0.67	3.46	5.66	3.17	5.68	0.55	0.31	0	0.27	0.21	0.22	0.37	0.77	0.63	0.13	0	0.47	2.01	0	ORTHOMCL6273	1	2	0	1	1
Solyc01g007530	Cytochrome b6 (AHRD V1 ***- B3TN79_BRADI); contains Interpro domain(s) IPR005797 Cytochrome b/b6, N-terminal	1.69	1.65	1.12	1.16	5.84	5.48	0.19	0.1	2.34	0.79	9.27	7.01	10.62	9.39	0.99	0.92	0.35	0.81	3.65	2.75	1.13	0.9	0.99	1.35	0.65	0.73	8.99	3.97	ORTHOMCL11441	1	1	0	2	0
Solyc01g007540	Cytochrome b6-f complex subunit 4 (AHRD V1 ***- A1XFY6_NUPAD); contains Interpro domain(s) IPR005870 Cytochrome b6/f complex, subunit IV	1	0.51	0.44	0.75	2.12	2.74	0	0.45	0.35	0.53	6.56	4.61	6.16	6.06	0.39	0	0.14	0.28	0.89	0.92	1.55	0.6	0.44	0.98	0.43	0.49	2.79	0.36	ORTHOMCL11690	1	2	0	1	0
Solyc01g007550	DNA-directed RNA polymerase subunit alpha (AHRD V1 ***- D3WBC7_9BORA); contains Interpro domain(s) IPR011260 RNA polymerase, alpha subunit, C-terminal	2.85	2.33	2.65	1.36	10.32	5.26	0	0.68	0	1.6	6.74	5.87	4.57	5.91	0	0.72	0	0	0.51	1.05	7.07	1.82	2.99	1.27	0	2.97	47.62	49.48	NA
Solyc01g007560	DNA-directed RNA polymerase subunit alpha (AHRD V1 ***- D3WBC7_9BORA); contains Interpro domain(s) IPR011773 DNA-directed RNA polymerase, alpha subunit	0.39	0	0.34	0.12	0.55	0.34	0.23	0.47	0.13	0.27	1.32	1.58	1.34	1.35	0.15	0.62	0.21	0.11	0.35	0.27	0.76	0.62	0.51	1.09	0.67	0.76	1.49	0	ORTHOMCL11689	1	1	0	2	0
Solyc01g007570	30S ribosomal protein S11 chloroplastic (AHRD V1 ***- D3WCH5_NEROL); contains Interpro domain(s) IPR019981 Ribosomal protein S11, bacterial-type	0.38	0.17	0.25	0.2	0.62	0.57	0.52	0.59	0.23	0.46	1.48	2.01	1.94	1.7	0.25	0.49	0.24	0.06	0.73	0.91	3.39	2.61	2.68	2.69	2.64	1.56	0.68	1.74	ORTHOMCL6383	1	1	0	3	0
Solyc01g007580	30S ribosomal protein S8 (AHRD V1 ***- D4PBE7_PHODC); contains Interpro domain(s) IPR000630 Ribosomal protein S8	0.32	0.11	0.06	0.06	0.42	0.31	0.64	0.32	0.22	0.07	2.17	1.57	0.92	1.11	0	0.14	0.17	0	0.47	0.15	2.49	2.3	1.12	2.03	0.74	0.69	1.56	3.02	ORTHOMCL14809	1	1	0	1	0
Solyc01g007590	50S ribosomal protein L14 chloroplastic (AHRD V1 ***- D3WBB8_9BORA); contains Interpro domain(s) IPR005745 Ribosomal protein L14, bacterial-type	0.24	0.57	0.65	0.38	0.72	0.64	0.67	0.19	0.44	0.34	1.89	2.35	2.01	1.75	0.37	0.4	0	0.27	0.99	1.03	3.83	1.27	2.79	3.48	1.83	0.62	0.67	1.27	ORTHOMCL14097	1	1	0	0	1
Solyc01g007600	50S ribosomal protein L16 chloroplastic (AHRD V1 ***- D3WCG3_NEROL); contains Interpro domain(s) IPR000114 Ribosomal protein L16	1.1	0.84	0.96	1.09	1.14	2.11	1.42	0.88	1.52	2.05	7.73	5.79	5.45	4.21	1.13	1.04	0.99	0.51	2.52	2.87	6.95	4.37	7.04	6.75	2.63	2.26	7.39	5.56	ORTHOMCL21780	1	0	0	1	0
Solyc01g007610	30S ribosomal protein S3 chloroplastic (AHRD V1 ***- D3WBD9_9BORA); contains Interpro domain(s) IPR005704 Ribosomal protein S3, bacterial	0.51	0.7	0.8	1.26	1.25	1.54	0.72	0.88	1.65	1.16	5.44	4.87	2.26	3.13	0.99	0.7	0.2	0.72	2	2.16	4.49	2.13	5.39	3.91	2.17	1.38	2.11	2.53	ORTHOMCL6380	1	2	0	1	1
Solyc01g007620	30S ribosomal protein S19 chloroplastic (AHRD V1 ***- D3WDP2_CORFO); contains Interpro domain(s) IPR002222 Ribosomal protein S19/S15	0.49	3.01	2.28	1.76	0.56	2.83	2.94	2.94	8.16	2.76	18.27	11.57	5.63	3.96	0.76	1.25	0	1.1	4.8	8.16	8.38	4.7	6.88	6.04	4.52	3.83	8.21	3.55	ORTHOMCL6381	1	2	0	2	0
Solyc01g007630	50S ribosomal protein L2 chloroplastic (AHRD V1 ***- A6YA71_9MAGN); contains Interpro domain(s) IPR005880 Ribosomal protein L2, bacterial-type	7.98	6.97	8.53	10.54	16.84	19.75	5.4	5.09	10.96	10.12	33.21	26.08	38.22	38.46	16.55	17.83	12.63	11.57	22.71	25.44	20.18	14.99	15.67	16.14	13.85	17.51	21.62	28.15	ORTHOMCL4196	1	2	0	2	1
Solyc01g007640	Ycf2 (AHRD V1 ***- D2KLP5_OLEEU); contains Interpro domain(s) IPR008543 Chloroplast Ycf2	0.07	0.14	0.12	0.13	0.13	0.08	0.3	0.32	0.21	0.21	0.75	0.64	0.56	0.72	0.14	0.1	0.05	0.04	0.5	0.44	0.22	0.36	0.47	0.5	0.34	0.5	0.36	0.27	ORTHOMCL2911	2	3	0	2	0
Solyc01g007650	Ycf15 (AHRD V1 ***- D2KLP6_OLEEU); contains Interpro domain(s) IPR019645 Protein precursor Ycf15, putative, chloroplast	0.14	0.14	0.16	0	0.63	0.64	0.33	1	0.38	0.39	1.17	1.23	0.96	1.28	0.21	0	0.6	0.16	0.49	0.77	0.43	0.44	0	0.62	0.16	0.36	0.58	1.41	ORTHOMCL14925	1	1	0	1	0
Solyc01g007660	NAD(P)H-quinone oxidoreductase subunit 2 chloroplastic (AHRD V1 ***- D3WB81_9BORA); contains Interpro domain(s) IPR010096 NADH-quinone oxidoreductase, chain N	1.77	1.61	2.86	2.51	10.1	8.19	0.44	0.72	3.24	4.25	8.53	8.68	10.87	9.73	4.41	3.74	2.54	2.72	5.99	5.14	7.27	5.66	4.95	4.61	4.78	3.26	17.15	13.38	ORTHOMCL1077	4	2	0	3	2
Solyc01g007670	30S ribosomal protein S7 chloroplastic (AHRD V1 ***- D3WBE1_9BORA); contains Interpro domain(s) IPR005717 Ribosomal protein S7, bacterial-type	58.92	56.23	72.2	66.69	270.48	262.82	7.24	9.07	60.06	50.56	87.86	75.55	94.77	96.99	55.6	57.19	38.81	35.02	72.69	68.24	59.65	55.7	40.97	42.52	41.19	39.16	318.29	308.78	ORTHOMCL5502	1	2	1	1	1
Solyc01g007680	Orf146 protein (AHRD V1 ***- Q9MFF3_BETVU)	0	0	0	0	0	0	0	0	0	0	0	0.64	0	0.25	0	0	0	0	0.19	0	0	0	0	0	0	0	0	0	ORTHOMCL6206	1	4	0	0	0
Solyc01g007690	Unknown Protein (AHRD V1)	0.25	0.09	0.1	0.71	0.29	0.1	0	0	0.35	0.47	0.43	0.37	0.77	0.49	0	0	0	0	3.83	3.51	0	0	0.3	0	0.39	0.99	0.35	1.96	NA
Solyc01g007700	Conserved protein (AHRD V1 *-*- C7TFZ2_LACRL)	0	2.69	0	6.49	0	0	0	0.19	0	6.09	0	0	0	0	0	0	0	0	0	0	0	0	0	0	0	0	0	0	ORTHOMCL20936	1	1	0	0	0
Solyc01g007710	Unknown Protein (AHRD V1)	0	0	0	0	0	0	0	0	0	0	0	0	0	0	0	0	0	0	0	0	0	0	0	0	0	0	133.27	78.07	ORTHOMCL20935	1	1	0	0	0
Solyc01g007720	ORF42f (AHRD V1 *-*- Q32989_PINTH)	8.48	8.57	15.01	13.72	26.21	24.47	3.24	3.81	17.09	16.38	33.76	27.98	25.97	24.46	2.37	3.06	1.15	1.95	157.81	160.26	5.84	5.23	7.77	6.47	11.87	19.08	21.23	17.73	ORTHOMCL11456	1	2	0	1	0
Solyc01g007730	ORF91 (AHRD V1 *--- C1BRN8_9MAXI)	0	0	0	0	0	0	0	0	0	0	0	0	0	0	0	0	0	0	0	0	0	0	0	0	0	0	0	0	ORTHOMCL13945	1	2	0	0	0
Solyc01g007740	Peroxiredoxin (AHRD V1 **-- Q9FE12_PHAVU); contains Interpro domain(s) IPR000866 Alkyl hydroperoxide reductase/ Thiol specific antioxidant/ Mal allergen	46.22	42.81	39.89	33.38	22.22	24.46	25.79	27.84	62.49	56.68	75.96	66.04	63.66	63.88	61.21	63.85	55.64	54.83	79.8	77.07	100.15	104.37	108.66	107.34	118.62	110.41	44.91	50.71	ORTHOMCL2416	2	2	2	1	1
Solyc01g007750	Mitochondrial transcription termination factor (Fragment) (AHRD V1 *--- C6FB10_PSEMZ); contains Interpro domain(s) IPR003690 Mitochodrial transcription termination factor-related	5.23	5.09	7.81	5.26	8.74	9.96	2.09	1.79	5.86	6.29	15.03	13.33	14.75	15.61	9.58	9.07	5.31	5.13	6.27	5.9	13.01	12.05	6.69	8.64	9.84	9.4	33.55	27.05	ORTHOMCL9354	1	1	1	1	1
Solyc01g007760	Transcription factor E2F (AHRD V1 **** Q9LEL4_DAUCA); contains Interpro domain(s) IPR015633 E2F Family	8.72	6.85	7.54	6.94	6.45	5.83	12.13	11.35	13.56	12.03	11.43	9.88	8.54	9.27	12.29	13.79	15.47	12.73	19.86	19.07	10	12.14	15.2	14.95	23.58	23.97	9.42	12.64	ORTHOMCL11580	1	1	0	1	1
Solyc01g007770	Genomic DNA chromosome 5 P1 clone MHF15 (AHRD V1 ***- Q9FNI0_ARATH)	4.58	5.89	9.69	11.38	6.79	6.37	17.62	17.87	10.58	11.38	9.34	8.83	7.81	7.05	16.46	16.87	12.74	12.8	19.21	21.16	7.3	8.43	4.12	4.6	6.49	5.97	3.11	2.89	ORTHOMCL15153	1	1	1	0	0
Solyc01g007780	Receptor expression-enhancing protein 3 (AHRD V1 *--- B6TB01_MAIZE); contains Interpro domain(s) IPR004345 TB2/DP1 and HVA22 related protein	2.17	2.89	2.08	1.35	1.82	2.4	16.87	17.07	1.05	0.8	0.32	0.7	0.43	0.54	0.58	0.36	0.1	0.21	0.75	0.52	0.44	0.9	0.17	0.32	0.43	0.25	1.45	0.27	ORTHOMCL20934	1	1	0	0	0
Solyc01g007790	UPF0554 protein C2orf43 homolog (AHRD V1 **-- CB043_CHICK); contains Interpro domain(s) IPR019363 Protein of unknown function DUF2305	16.7	14.94	9.9	10.27	6.61	8.17	9.59	8.24	15.25	14.17	16.64	15.07	17.51	15.57	14.53	14.24	9.81	11.78	22.37	21.43	9.26	12.55	11.25	12.03	12.75	10.92	1.83	2.75	ORTHOMCL8860	1	1	1	1	1
Solyc01g007800	Plant-specific domain TIGR01568 family protein (AHRD V1 *--- B6SZV1_MAIZE); contains Interpro domain(s) IPR006458 Protein of unknown function DUF623, plant	1.15	2.06	1.34	1.83	1.52	0.88	0.92	1.03	0.66	0.27	0.16	0	0	0	0	0	0	0	0	0	0.15	0	0	0	0.11	0.12	2.14	3.47	ORTHOMCL1438	2	2	2	1	3
Solyc01g007810	Plant-specific domain TIGR01568 family protein (AHRD V1 *--- B6U9N9_MAIZE); contains Interpro domain(s) IPR006458 Protein of unknown function DUF623, plant	5.04	5.35	1.55	2.16	7.12	7.58	0.69	0.23	1.85	2.41	0.48	0.7	0.11	0	0	0	0	0.11	0	0	0	0	0	0	0	0	11.95	10.07	ORTHOMCL12865	1	1	2	0	0
Solyc01g007820	Unknown Protein (AHRD V1)	4.55	5.05	4.85	4.54	3.87	3.94	13.66	9.55	4.73	5.33	8.35	6.71	5.22	6.13	2.92	3.86	5.76	3.84	7.76	5.26	5.89	4.24	7.98	7.22	11.8	6.92	7.41	7.7	NA
Solyc01g007830	Unknown Protein (AHRD V1)	0.52	0	0.3	0	0.59	0	0.31	0.31	0.36	0	0	0.38	0.3	0.6	0	0	0.28	0.29	0.23	0.72	0	0	0	0	0.3	0.68	0.73	0.38	NA
Solyc01g007840	CCR4-NOT transcription complex subunit 7 (AHRD V1 ***- B4FG48_MAIZE); contains Interpro domain(s) IPR006941 Ribonuclease CAF1	11.66	11.09	9.67	11.61	6.84	6.02	11.06	11.73	12.54	13.74	23.05	14.79	17.3	15.71	15.95	17	18.49	18.78	25.95	26.14	22.8	17.31	22.87	22.46	22.72	23.26	5.8	2.95	ORTHOMCL20933	1	1	0	0	0
Solyc01g007850	Pentatricopeptide repeat-containing protein (AHRD V1 ***- D7MHD4_ARALY); contains Interpro domain(s) IPR002885 Pentatricopeptide repeat	2.86	3.09	2.88	2.9	2.65	3.36	3.2	2.8	2.11	2.29	3.91	3.37	4.31	4.11	3.98	3.32	3.39	4.16	4.57	4.83	6.38	8.25	6.91	7.59	7.58	7.9	5.24	6.74	ORTHOMCL139	8	8	7	10	4
Solyc01g007860	Ubiquitin-conjugating enzyme family protein-like (AHRD V1 ***- Q3HVN0_SOLTU); contains Interpro domain(s) IPR000608 Ubiquitin-conjugating enzyme, E2	95.01	86.48	125.21	118.19	73.36	74.07	151.08	146.29	146.71	144.68	171.27	154.34	224.1	216.35	128.68	127.18	146.58	137.02	90.97	91.06	153.25	159.29	134.46	135.36	107.04	107.6	55.98	54.72	ORTHOMCL2519	2	2	2	1	1
Solyc01g007870	Cyclin B-like protein (AHRD V1 *-*- Q5U8T5_9SOLA)	20.51	18.52	4.08	5.08	4.19	3.84	1.77	1.55	9.22	10.12	5.94	3.54	3.81	3.41	0.85	0.94	0.2	0.62	0.49	0	6.03	4.42	0.97	7.45	0	0.24	1.55	6.96	ORTHOMCL3385	1	1	2	1	2
Solyc01g007880	MORN repeat protein (AHRD V1 *--- D4V7H0_BACVU); contains Interpro domain(s) IPR019746 Tubulin/FtsZ, N-terminal	4.31	4.58	3.52	4.01	6.13	6.58	3.59	3.86	5.66	6.33	6.32	6.79	7.01	6.2	6.25	6.51	3.74	3.36	6.81	6.72	5.15	6.17	4.51	4.43	4.82	6.08	5.25	5.08	ORTHOMCL9932	1	1	1	1	1
Solyc01g007890	Unknown Protein (AHRD V1)	5.86	5.3	4.45	4.13	12.93	16.21	11.62	12.24	3.33	4.54	3.69	4.43	5.25	5.11	0.81	1.05	1.06	1.18	0.13	0.35	2.57	2.16	0.53	0.59	1.12	1.27	6.28	4.79	ORTHOMCL20932	1	1	0	0	0
Solyc01g007900	Tobamovirus multiplication protein (Fragment) (AHRD V1 ***- B0ZZ80_ARAHY); contains Interpro domain(s) IPR009457 Protein of unknown function DUF1084	16.99	18.85	13.57	13.55	8.35	7.17	18.26	14.64	15.89	16.2	16.29	13.68	12.13	10.24	21.13	19.69	20.29	19.86	27.49	27.49	12.4	16.77	15.79	16.12	24.99	25.24	4.38	1.98	ORTHOMCL3940	1	1	2	1	2
Solyc01g007910	Succinyl-CoA ligase (AHRD V1 ***- B9RL91_RICCO); contains Interpro domain(s) IPR005810 Succinyl-CoA ligase, alpha subunit	42.49	39.85	35.23	30.79	21.71	17.84	82.14	82.49	73.36	72.3	65.21	59.04	39.19	40	53.89	51.18	38.49	39.74	50.31	50.13	38.37	36.22	42.44	39.67	29.82	27.78	44.31	41.47	ORTHOMCL4496	1	1	2	2	0
Solyc01g007920	Isochorismatase family protein (AHRD V1 ***- B5IAW4_ACIB4); contains Interpro domain(s) IPR000868 Isochorismatase-like	17.67	14.49	19.59	15.34	21.38	21.77	15.03	14.48	15.5	14.24	17.54	16.82	32.58	35.28	42.37	38.2	45.46	44.32	39.98	38.86	51.65	50.1	63.64	55.94	87.74	80.99	11.02	8.21	ORTHOMCL7106	1	1	2	1	0
Solyc01g007930	Sel1 domain protein repeat-containing protein (AHRD V1 *-*- A5GBQ0_GEOUR); contains Interpro domain(s) IPR011990 Tetratricopeptide-like helical	10.23	11.54	9.51	9.72	7.17	6.51	7.51	6.32	10.05	10.28	11.12	9.32	22.9	24.4	13.37	12.22	7.87	8.15	12.51	11.4	16.27	16.13	10.65	12.36	14.35	16.07	3.72	3.86	ORTHOMCL20931	1	1	0	0	0
Solyc01g007940	Alanine aminotransferase 2 (AHRD V1 **** A8IKE5_SOYBN); contains Interpro domain(s) IPR004839 Aminotransferase, class I and II	0	0	0.07	0	0.07	0.07	0	0	0	0	0	0	0	0	0	0	0	0	0.11	0.06	2.32	1.24	0.42	1.41	0.83	0	0	0	ORTHOMCL2707	2	2	2	1	1
Solyc01g007950	Peroxidase 1 (AHRD V1 *-*- B6T173_MAIZE); contains Interpro domain(s) IPR000823 Plant peroxidase	99.95	98.6	137.26	136.99	0.8	0.56	0.49	0.52	2.25	2.28	2.42	1.99	1.67	2.34	0.79	0.65	0.18	0.03	0.38	0.35	1.22	1.12	0.43	0.36	0.09	0.11	0.6	0.43	ORTHOMCL2771	2	2	2	1	1
Solyc01g007960	RLK, Receptor like protein, putative resistance protein with an antifungal domain	0.13	0.04	0.15	0.2	0.19	0.1	9.52	7.87	0	0.06	0.22	0.19	0.2	0.05	0.39	0.27	0.32	0.1	0.04	0	0.2	0.14	0	0	0	0	0	0.06	ORTHOMCL498	5	9	1	2	0
Solyc01g007970	RLK, Receptor like protein, putative resistance protein with an antifungal domain	0.43	0.53	0.4	0.62	0.29	0.3	1.61	1.92	0.42	0.67	0.29	0.26	0.75	0.55	0.53	0.61	0.52	0.44	0.12	0.04	0.2	0	0	0	0	0	0	0	ORTHOMCL498	5	9	1	2	0
Solyc01g007980	RLK, Receptor like protein, putative resistance protein with an antifungal domain	5.51	6.09	6.21	7.46	7.02	6.12	1.41	1.65	4.49	6.14	9.25	8.84	11.61	10.84	11.04	12.1	6.11	6.37	1.55	1.68	0.06	0	0	0	0	0	0	0	ORTHOMCL498	5	9	1	2	0
Solyc01g007990	RLK, Receptor like protein, putative resistance protein with an antifungal domain	4.09	3.05	2.93	4.25	2.42	3.09	7.88	5.95	5.5	6.22	6.01	4.62	6.75	5.55	4.59	4.95	3.56	2.83	4.14	3.64	5.4	5.85	4.69	5.48	3.56	4.78	2.24	2.55	ORTHOMCL498	5	9	1	2	0
Solyc01g008000	ADP-ribosylation factor (AHRD V1 ***- Q76ME3_WHEAT); contains Interpro domain(s) IPR006688 ADP-ribosylation factor	575.75	571.54	627.58	620.49	254.31	265.76	390.03	368.6	525.74	533.12	443.27	385.06	752.76	734.37	1068.86	1042.57	921.19	920.74	421.45	433.12	334.69	306.48	283.98	290.89	282.53	291.77	165.55	169.24	ORTHOMCL20930	1	1	0	0	0
Solyc01g008010	Os09g0327550 protein (Fragment) (AHRD V1 *-*- C7J753_ORYSJ); contains Interpro domain(s) IPR003863 Protein of unknown function DUF220	44.45	46.21	94.52	99.07	15.7	14.93	7.8	6.61	15.01	13.38	9.89	8.42	5.42	4.47	5.87	5.59	1.78	2.95	2.1	2.31	5.71	8.91	15.19	13.9	14.37	12.57	20.42	16.65	ORTHOMCL10013	1	1	1	1	1
Solyc01g008020	Equilibrative nucleoside transporter 1 (AHRD V1 **** Q4W6L4_ORYSJ); contains Interpro domain(s) IPR002259 Delayed-early response protein/equilibrative nucleoside transporter	27.38	24.98	27.58	25.21	52.92	59.14	70.35	69.19	39.08	36.34	21.04	18.14	34.01	31.53	5.44	6.82	0.55	0.43	0.11	0	2.84	2.42	0.55	1.48	0.58	0.25	26.75	25.97	ORTHOMCL13083	1	1	1	0	1
Solyc01g008030	Unknown Protein (AHRD V1)	0.5	0.51	0	0	0	0.29	40.38	43.03	0.7	0	0	0	0.58	0	0	0.32	0	0	0	0	0	0	0	0.28	0	0	0	0	ORTHOMCL20929	1	1	0	0	0
Solyc01g008040	S-locus F-box-like protein a (Fragment) (AHRD V1 ***- B0F0G3_PETIN); contains Interpro domain(s) IPR006527 F-box associated	3.62	2.24	0.7	0.81	0	0	0.09	0.09	0	0	0	0	0	0	0	0	0.08	0.08	0	0	0	0	0	0	0	0	0	0	ORTHOMCL20928	1	1	0	0	0
Solyc01g008050	Leaf senescence protein-like (AHRD V1 ***- Q67V91_ORYSJ); contains Interpro domain(s) IPR004253 Protein of unknown function DUF231, plant	21.71	22.99	7.5	5.66	0.13	0	5.04	5.03	0.08	0	0.1	0.09	0	0.07	0	0	0	0	0	0	0.18	0	0	0.2	0	0	0	0	ORTHOMCL5594	1	1	1	1	2
Solyc01g008060	Phosphoglycerate mutase (AHRD V1 *--- A4TBN9_MYCGI); contains Interpro domain(s) IPR002156 Ribonuclease H	35.7	32.92	32.75	29.38	23.79	26.84	31.7	32.38	33.12	30.69	30.18	26.8	29.49	27.58	23.05	20.36	18.09	14.56	15.09	14.9	18.49	20.76	19.19	21.93	18.04	16.94	14.78	15.86	ORTHOMCL20927	1	1	0	0	0
Solyc01g008070	Alpha/beta superfamily hydrolase (AHRD V1 *--- D0CIF5_9SYNE); contains Interpro domain(s) IPR010765 Protein of unknown function DUF1350	37.43	34.36	48.38	45.8	34.94	37.6	15.79	13.33	25.43	21.97	26.86	23.06	50.12	46.85	52.7	49.31	108.54	106.9	154.78	157.09	47.27	55.06	89.56	83.65	120.66	138.48	26.61	19.14	ORTHOMCL6835	1	1	1	1	1
Solyc01g008080	Ribosomal protein S27 (AHRD V1 ***- Q3HVK9_SOLTU); contains Interpro domain(s) IPR000592 Ribosomal protein S27e	106.71	107.53	105.88	106.98	53.38	52.42	121.6	122.5	259.29	251.78	228.35	210.05	339.49	324.72	280.27	283.24	221.26	219.37	65.67	65.02	116.58	102.13	67.56	72.17	53.42	51.52	82.55	102.58	ORTHOMCL1757	2	2	1	2	2
Solyc01g008090	Ribosomal protein S27 (AHRD V1 ***- Q3HVK9_SOLTU); contains Interpro domain(s) IPR000592 Ribosomal protein S27e	460.66	466.56	440.51	434.56	252.86	242.34	566.94	561.21	1154.02	1107.55	896.13	844.15	852.03	821.74	794.16	784.84	634.52	617.63	359.41	338.65	241.06	218.45	171.93	200.15	207.33	188.86	418.44	520.12	ORTHOMCL1757	2	2	1	2	2
Solyc01g008100	Transferase transferring glycosyl groups (AHRD V1 **-* D7MH74_ARALY)	32.45	31.01	20.71	19.99	13.85	14.36	22.34	19.85	32.94	29.88	41.48	30.81	29.54	25.39	28.34	24.04	19.72	21.01	5.43	4.22	26.98	18.91	18.32	21.26	17.8	17.25	19.29	18.66	ORTHOMCL1384	2	2	2	1	3
Solyc01g008110	Cytochrome P450	241.21	235.42	155.84	154.32	141.8	144.64	335.79	326.46	590.27	565.38	384.29	326.23	156.81	152.15	137.23	135.42	200.99	202.43	164.64	164.35	141.72	131.84	146.12	152.53	149.07	141	229.11	241.04	ORTHOMCL6001	1	1	1	2	1
Solyc01g008120	Histone acetyltransferase (AHRD V1 **** B9HG17_POPTR); contains Interpro domain(s) IPR009255 Transcriptional coactivation	8.69	8.44	12.85	13.01	11.28	11.63	30.02	29.07	12.87	11.12	17.13	14.16	19.25	17.15	17.65	17.01	16.4	15.53	20.39	19.17	15.97	20.3	17.58	16.84	14.59	14.39	13.28	10.99	ORTHOMCL586	4	4	5	2	1
Solyc01g008130	DEP domain-containing protein 1B (AHRD V1 *--- DEP1B_HUMAN); contains Interpro domain(s) IPR006869 Protein of unknown function DUF547	6.37	5.27	39.09	35.03	1.88	2.9	17.22	16.28	0.81	1.13	2.73	2.78	7.97	8.9	14.78	15.62	5.45	4.58	1.32	1.16	14.21	13.38	3.69	4.72	0.46	0.64	0.38	0.58	ORTHOMCL8857	1	1	1	1	1
Solyc01g008140	Receptor kinase (AHRD V1 **** B8XA57_GOSBA); contains Interpro domain(s) IPR002290 Serine/threonine protein kinase	3.65	3.56	7.68	8.56	3.16	2.68	27.85	26.04	3.72	3.15	7.47	6.4	9.62	8.37	6.8	7.21	8.99	8.12	4.6	4.19	16.51	16.1	13.23	14.44	8.77	8.32	2.85	3.79	ORTHOMCL125	3	3	5	3	25
Solyc01g008150	Unknown Protein (AHRD V1)	1.14	0	0	0	4.51	1.31	0.68	0	0	0	0	0	0	0.66	0	0	0	0	0.51	0	0.88	0.91	0	0	0.66	0	0	0	NA
Solyc01g008160	Tetratricopeptide repeat-containing protein (AHRD V1 ***- D7L8H9_ARALY); contains Interpro domain(s) IPR011990 Tetratricopeptide-like helical	13.84	12.28	11.63	11.22	8.04	7.72	4.8	5.14	24.17	21.77	20.33	17.03	16.26	13.53	14.62	14.76	23.26	23.2	31.42	31.33	17.32	19.53	55.62	50.91	19.49	18.54	31.9	38.36	ORTHOMCL12640	1	1	1	1	0
Solyc01g008170	Zinc finger CCCH domain-containing protein 17 (AHRD V1 ***- C3H17_ARATH); contains Interpro domain(s) IPR000571 Zinc finger, CCCH-type	11.49	11.61	18.88	19.3	9.79	11.29	20.47	17.41	19.93	16.85	22.53	18.84	23.5	22.98	23.58	22.14	16.38	16.96	15.17	12.27	24.06	28.26	20.71	21.86	18.37	16.08	12.49	15.05	ORTHOMCL3657	2	2	1	1	1
Solyc01g008180	DNA-binding protein (Fragment) (AHRD V1 *--* Q42051_ARATH); contains Interpro domain(s) IPR005516 Remorin, C-terminal region	15.34	15.82	11.12	10.93	14.3	15.99	13.41	14.11	14.66	14.03	7.34	7.33	8.29	8.43	8.84	11.67	7.93	7.93	3.1	3.06	8.12	7.39	6.48	6.38	2.15	1.88	8.89	8.99	ORTHOMCL9793	1	1	1	1	1
Solyc01g008190	Os05g0304100 protein (Fragment) (AHRD V1 *-*- Q0DJB8_ORYSJ)	8.52	7.2	12.21	13.6	6.02	7.84	13.64	13.03	8.22	7.81	6.27	5.83	10.06	10.26	6.85	7.54	10.72	10.41	12.52	13.7	9.98	8.87	9.53	11.62	10.38	11.26	9.3	7.34	ORTHOMCL4009	1	1	3	1	1
Solyc01g008200	Os05g0304100 protein (Fragment) (AHRD V1 ***- Q0DJB8_ORYSJ)	6.06	8.7	9.56	12.25	4.09	4.33	9.69	8.12	6.39	6.89	6.35	7.02	9.59	6.82	6.22	8.98	6.57	9.07	9.74	10.39	13.21	10.82	14.15	11.47	10.13	13.71	8.25	3.76	ORTHOMCL22301	1	0	0	1	0
Solyc01g008210	Unknown Protein (AHRD V1)	7.53	7.93	4.19	5.09	2.1	1.89	8.25	9.68	4.99	5.21	4.99	6.44	10.64	8.94	10.76	10.27	3.32	2.09	3.3	3.13	2.71	3.83	1.34	1.47	0.38	0.43	0.61	1.27	NA
Solyc01g008220	Arabinogalactan protein (AHRD V1 ***- B6SST2_MAIZE)	1.42	2.37	2.25	1.54	0.88	0.74	4.17	2.78	1.61	1.45	4.36	2.66	3.84	5.35	4.76	6.55	1.26	0.87	1.37	1.43	2.4	2.67	0.45	1.01	0.44	0.67	1.26	0.37	NA
Solyc01g008230	TCP family transcription factor (AHRD V1 *-** A6MCZ2_9ORYZ); contains Interpro domain(s) IPR005333 Transcription factor, TCP	55.87	51.77	47.29	44.96	43.41	38.98	30.17	30.21	108.17	105.22	89.25	78.12	140.87	139.45	102.09	96.05	58.41	60.28	79.54	72.32	62.77	66.29	40.96	38.26	29.56	24.86	16.71	22.6	ORTHOMCL14176	1	1	0	0	1
Solyc01g008240	Solute carrier family 2, facilitated glucose transporter member 3 (AHRD V1 ***- GTR3_BOVIN); contains Interpro domain(s) IPR003663 Sugar/inositol transporter	583.17	566.87	616.39	615.58	0.24	0.3	1.49	0.72	0.71	0.48	0.22	0.19	1.87	2.13	0.93	0.76	0.37	0.14	0.04	0.12	0	0.14	0	0	0	0.06	0	0	ORTHOMCL254	4	4	6	5	6
Solyc01g008250	Thioredoxin X (AHRD V1 ***- B6T9S0_MAIZE); contains Interpro domain(s) IPR015467 Thioredoxin, core	29.47	26.07	32.98	27.54	108.69	109.33	4.79	3.66	20.95	17.78	22.29	20.29	21.43	17.45	14.39	15.44	9.49	11.45	12.61	12.01	15.7	14.24	12.95	13.32	14.96	17.81	157.2	134.66	ORTHOMCL10311	1	1	1	1	1
Solyc01g008260	E2F-associated phosphoprotein (AHRD V1 ***- Q0P5M4_BOVIN); contains Interpro domain(s) IPR019370 E2F-associated phosphoprotein, C-terminal	14.57	16.59	13.12	15.08	6.83	6.2	10.39	10.77	12	12.01	8.16	7.11	11.56	9.74	20.25	16.86	15.58	13.42	15.69	13.77	14.3	14.52	9.8	10.55	4.92	6.14	9.48	10.96	ORTHOMCL7393	1	1	1	1	1
Solyc01g008270	Prefoldin subunit 5 (AHRD V1 ***- B6TVU2_MAIZE); contains Interpro domain(s) IPR011599 Prefoldin alpha subunit	39.24	44.65	29.13	28.83	27.62	30.36	72.71	66.83	87.77	92.26	66.2	61.51	69.17	66.26	55.14	55.31	36.9	37.91	51.18	48.09	54.54	62.2	49.72	49.34	44.39	46.45	35.14	43.1	ORTHOMCL7104	1	1	1	1	1
Solyc01g008280	Serine/threonine-protein phosphatase 2A activator 2 (AHRD V1 **** B6TQY2_MAIZE); contains Interpro domain(s) IPR004327 Phosphotyrosyl phosphatase activator, PTPA	12.45	11.66	17.43	19.46	7.52	9.07	27.82	27.25	20.09	19.27	31.28	28.39	33.25	31.54	43.2	39.39	41.54	39.48	40.63	37.73	48.04	47.6	37.72	41.76	29.56	27.53	9.26	6.25	ORTHOMCL4782	1	1	1	2	1
Solyc01g008290	Dihydroorotate dehydrogenase (AHRD V1 ***- B6U892_MAIZE); contains Interpro domain(s) IPR005719 Dihydroorotate dehydrogenase, class 2	7.69	6.55	6.41	3.74	5.46	4.76	10.48	10.77	6.74	7.25	5.97	6	5.41	3.84	5.12	4.92	1.78	1.56	7.11	6.1	11.87	12.36	9.05	10.06	9.09	6.34	10.04	11.15	ORTHOMCL7103	1	1	1	1	1
Solyc01g008300	Hydroxycinnamoyl CoA shikimate/quinate hydroxycinnamoyltransferase-like protein (AHRD V1 **-* B9IAS9_POPTR); contains Interpro domain(s) IPR003480 Transferase	2.28	1.8	2.53	3.22	2.35	2.75	14.9	15.13	1.43	1.45	2.28	1.53	1.66	2.15	5.1	4.21	5.73	5.81	1.93	1.72	2.25	3.8	2.18	3.36	0.95	0.67	7.65	4.95	ORTHOMCL20926	1	1	0	0	0
Solyc01g008310	Phenylalanyl-tRNA synthetase beta chain (AHRD V1 **** B6SHI1_MAIZE); contains Interpro domain(s) IPR004531 Phenylalanyl-tRNA synthetase, class IIc, beta subunit, archae/euk cytosolic	28.37	27.33	33.37	30.64	18.98	22.56	52.12	50.96	45.72	41.02	49.92	43.17	57.09	52.49	56.53	56.57	48.14	51.39	49.21	49.77	30.94	40.16	43.01	43.14	40.89	38.62	12.6	17.39	ORTHOMCL9970	1	1	1	1	1
Solyc01g008320	DDHD domain containing 1 (AHRD V1 *--- Q3ZAU5_RAT); contains Interpro domain(s) IPR004177 DDHD	10.11	8.73	15.45	14.46	9.43	9.54	21.44	20.51	9.41	10.52	16.39	13.8	21.96	20.12	25.13	24.75	34.3	32.91	61.31	61.09	21.97	30.18	29.53	27.17	36.15	34.07	5.18	3.99	ORTHOMCL10453	1	1	1	1	1
Solyc01g008330	Acetyl-CoA carboxylase biotin carboxylase (AHRD V1 ***- B4VQU4_9CYAN); contains Interpro domain(s) IPR004549 Acetyl-CoA carboxylase, biotin carboxylase	65.4	60.45	39.46	31.53	50.15	49.27	43.94	43.33	120.46	112.1	114.07	86.8	78.5	74.04	44.49	40.58	50.25	49	70.96	73.53	30.58	29.66	35.31	36.78	35.01	38.34	64.27	87.91	ORTHOMCL12027	1	1	1	1	0
Solyc01g008340	50S ribosomal protein L19 (AHRD V1 *-*- B6T8M1_MAIZE); contains Interpro domain(s) IPR001857 Ribosomal protein L19	13.02	13.45	9.54	9.35	9.89	10.3	21.8	20.99	24.09	21.22	27.01	19.68	12.55	11.35	17.25	22.02	16.39	16.39	25.24	23.83	13.25	15.8	13.7	12.76	8.02	9.67	8.08	11.23	ORTHOMCL3873	1	1	3	1	1
Solyc01g008350	DNAJ heat shock N-terminal domain-containing protein-like (AHRD V1 ***- Q5QMD6_ORYSJ)	0.08	0.08	0	0	0	0	0	0.03	0	0.07	0.22	0.15	0.5	0.59	0.04	0.23	0.03	0.09	0.09	0.1	0.04	0.16	0.05	0.06	0.12	0.03	0.07	0	NA
Solyc01g008360	Pre-mRNA branch site p14-like protein (AHRD V1 **-- B6T0W0_MAIZE); contains Interpro domain(s) IPR012677 Nucleotide-binding, alpha-beta plait	88.07	88.01	72.04	73.73	38.06	38.63	41.52	46.62	77.56	76.56	44.98	39.84	44.74	47.76	49.63	44.56	44.65	51.97	51.38	51.51	56.02	50.72	57.08	50.4	68.22	66.13	31.22	25.07	ORTHOMCL7315	1	1	1	1	1
Solyc01g008370	26S proteasome regulatory subunit (AHRD V1 ***- A8J8V5_CHLRE); contains Interpro domain(s) IPR000555 Mov34/MPN/PAD-1	65.06	63.3	69.69	69.07	48.96	49.64	120.51	114.36	106.25	103.43	112.67	94.87	126.93	120	66.14	67.21	78.61	79.16	102.84	105.5	67.1	72.07	80.84	87.03	106.59	98.94	44.15	51.98	ORTHOMCL3388	1	1	2	2	1
Solyc01g008380	Pentatricopeptide repeat-containing protein (AHRD V1 ***- D7KKP4_ARALY)	0.2	0.61	0.93	0.24	1.58	0	2.15	1.43	3.03	1.12	0.67	2.35	3.65	2.3	2.45	2.02	0	1.34	3.01	1.84	1.55	2.86	1.05	1.78	0.69	0.78	1.67	3.17	NA
Solyc01g008390	LRR receptor-like serine/threonine-protein kinase, RLP	0	0	0	0	0	0	0	0	0	0	0	0	0	0	0	0	0	0	0	0	0	0	0	0	0	0	0	0	ORTHOMCL14	23	47	0	8	0
Solyc01g008400	Unknown Protein (AHRD V1)	1.42	0.72	0.82	0	0	0	0	0.42	1.47	0.5	0.6	0.52	2.44	1.23	1.64	0.45	1.15	1.59	0.63	0.33	0.55	1.7	2.48	1.59	0.82	0.92	2.96	0.51	NA
Solyc01g008410	LRR receptor-like serine/threonine-protein kinase, RLP	0	0	0	0	0	0	0.05	0	0	0	0	0	0	0	0	0	0	0	0	0	0.43	0.5	0.14	0.57	0	0.05	0	0	ORTHOMCL14	23	47	0	8	0
Solyc01g008420	Mate efflux family protein (AHRD V1 **-- D7KHQ9_ARALY); contains Interpro domain(s) IPR002528 Multi antimicrobial extrusion protein MatE	5.68	4.28	3.75	3.97	0	0.31	0.55	0.27	3.15	4.66	7.62	7.71	8.24	8.92	6.16	7.63	4.89	5.88	0.57	0.71	9.32	7.11	1.51	1.63	0.37	0.12	0	0	ORTHOMCL2649	2	2	1	1	2
Solyc01g008430	Unknown Protein (AHRD V1)	0	0	0.09	0	0	0	0	0	0	0	0	0.11	0	0	0	0	0	0	0	0	0	0	0	0	0.09	0.1	0	0	ORTHOMCL13944	3	0	0	0	0
Solyc01g008440	Calcium-dependent protein kinase 8 (AHRD V1 **** Q6KC54_NICPL); contains Interpro domain(s) IPR002290 Serine/threonine protein kinase	22.88	24.07	34.01	32.42	7.73	6.29	6.15	6.09	2.85	3.34	5.11	4.66	5.57	4.65	7.4	6.98	2.14	1.8	10.54	9.81	18.06	17.02	16.61	14.87	13.07	11.21	6	5.9	ORTHOMCL221	6	3	8	5	5
Solyc01g008450	Unknown Protein (AHRD V1)	0.1	0	0	0	0	0	0.25	0.25	0	0.14	0	0	0	0	0	0	0	0	0	0	0	0	0	0	0	0	0	0	NA
Solyc01g008460	2Fe-2S ferredoxin (AHRD V1 **-- B6U5I8_MAIZE); contains Interpro domain(s) IPR001041 Ferredoxin	15.6	13.76	13.82	11.66	8.8	6.67	14.27	10.19	14.07	15.31	12.44	10.83	12.88	11.81	14.12	13.96	11.2	10.67	12.11	13.81	13.85	16.47	13.75	13.31	10.17	12.04	12.78	11.49	ORTHOMCL2316	2	1	2	1	2
Solyc01g008470	Non-selective cation channel-2 family (AHRD V1 **-- C1N231_MICPS); contains Interpro domain(s) IPR004728 Translocation protein Sec62	12.54	14.6	8.91	7.61	5.95	6.27	9.49	10.66	11.3	12.76	10.35	6.83	5.17	5.92	5.8	5.89	3.69	2.78	3.63	4.11	6.62	7.89	9.31	8.02	8.25	7	5.94	5.46	ORTHOMCL3360	2	2	1	1	1
Solyc01g008480	Pentatricopeptide repeat-containing protein (AHRD V1 ***- D7MTZ6_ARALY); contains Interpro domain(s) IPR002885 Pentatricopeptide repeat	3.48	2.95	2.76	3.11	5.06	4.18	5.8	5.51	4.7	3.98	5.35	5.41	6.34	6.92	7.59	7.44	5.19	6.01	6.57	5.32	5.05	5.79	5.54	5.67	4.92	4.36	3.11	2.29	ORTHOMCL9806	1	1	1	1	1
Solyc01g008490	Nuclear transcription factor Y subunit A-1 (AHRD V1 *-** B6TAR1_MAIZE); contains Interpro domain(s) IPR001289 CCAAT-binding transcription factor, subunit B	6.61	8.02	6.48	7.68	8.01	7.11	9.41	7.15	8.53	7.56	7.79	7.17	10.41	9.57	11.38	10.05	14.42	14.35	14.24	15.51	15.3	13.86	14.77	14.37	17.24	14.44	6.51	4.13	ORTHOMCL20925	1	1	0	0	0
Solyc01g008500	Receptor serine/threonine kinase (AHRD V1 **** O49202_ORYSJ); contains Interpro domain(s) IPR002290 Serine/threonine protein kinase	0.18	0.43	0.14	0.07	0.34	0.42	1.45	1.02	0.08	0.17	0.1	0.36	0.62	0.42	0.84	0.62	0.13	0	0.05	0.06	0.66	1.55	0.11	0.88	0.35	0.32	0.17	0.79	ORTHOMCL63	2	7	0	41	0
Solyc01g008510	Photosystem II 5 kDa protein, chloroplastic (AHRD V1 *-*- PST2_GOSHI)	0	0.14	0.16	0.33	0	0.32	0.49	0.49	0	0	0.23	0	0.16	0	0.42	0	4.61	2.62	17.42	20.26	8.3	3.5	13.21	10.59	15.62	15.17	0.76	0.2	ORTHOMCL3783	2	1	2	1	1
Solyc01g008520	DNA repair protein XRCC2 (AHRD V1 ***- XRCC2_HUMAN)	1.73	0.84	0.67	1.28	1.3	1.33	1.87	2.26	1.71	2.31	4.17	4	7.16	6.83	5.06	3.97	1.34	1.38	0.88	1.52	2.55	1.44	2.02	2.39	2.93	5.24	4.01	2.14	ORTHOMCL11840	1	1	1	1	0
Solyc01g008530	Cinnamoyl CoA reductase-like protein (AHRD V1 ***- B9HNY0_POPTR); contains Interpro domain(s) IPR016040 NAD(P)-binding domain	32.42	33.03	5.49	5.57	11.92	11.12	8.16	7.47	14.39	13.35	9.38	8.35	7.58	6.1	2.91	2.24	0.61	0.71	0.28	0.17	0.59	1.11	0.77	0.35	0.22	0.16	10.45	13.14	ORTHOMCL3782	1	1	2	2	1
Solyc01g008540	Cinnamoyl CoA reductase-like protein (AHRD V1 ***- B9HNY0_POPTR); contains Interpro domain(s) IPR016040 NAD(P)-binding domain	0.07	0.69	0.78	0.56	0	0	0.08	0	2.51	2.08	0.8	0.79	1	1.71	0	0	2.84	2.49	0	0.12	0	0	0	0	0	0	0.09	0	NA
Solyc01g008550	Cinnamoyl CoA reductase-like protein (AHRD V1 ***- B9HNY0_POPTR); contains Interpro domain(s) IPR016040 NAD(P)-binding domain	160.58	154.24	130.28	116.77	128.45	124.06	140.98	146.6	204.1	203.42	128.01	111.02	105.51	104.39	31.3	30.29	11.27	11.81	2.1	2.24	14.74	17.29	9.16	13.2	4.55	3.07	47.44	49.57	ORTHOMCL20924	1	1	0	0	0
Solyc01g008560	NAD kinase 1 (AHRD V1 **** B6SWV6_MAIZE); contains Interpro domain(s) IPR002504 ATP-NAD/AcoX kinase	16.71	13.12	16.63	16.31	9.17	8.67	18.02	18.64	11.52	12.18	9.31	8.57	6.87	6.14	18.45	19.09	7.66	8.84	16.14	17.47	7.91	8.06	7.76	8.31	7.57	6.99	6.54	5.12	ORTHOMCL8656	1	1	1	1	1
Solyc01g008570	Receptor-like protein kinase (AHRD V1 ***- Q9M577_ORYSA); contains Interpro domain(s) IPR002290 Serine/threonine protein kinase	0	0.33	0	0	0.12	0.13	0	0.52	0	0	0	0	0	0	0.17	0	0	0	0	0	0	0.17	0	0	0	0	0	0	NA
Solyc01g008580	Zinc transporter protein (AHRD V1 ***- D5LMF9_9FABA); contains Interpro domain(s) IPR003689 Zinc/iron permease	0	0	0	0	0	0	0	0	0	0	0	0	0	0	0	0	0	0	0	0	0	0	0	0	0	0	0	0	NA
Solyc01g008590	Zinc transporter protein (AHRD V1 *-*- C0L438_9MAGN); contains Interpro domain(s) IPR003689 Zinc/iron permease	0	0	0	0	0	0	0	0	0	0	0	0	0	0	0	0	0	0	0	0	0	0	0	0	0	0	0	0	NA
Solyc01g008600	Zinc finger CCCH domain-containing protein 53 (AHRD V1 ***- C3H53_ORYSJ); contains Interpro domain(s) IPR000571 Zinc finger, CCCH-type	15.36	14.48	8.12	7.39	3.14	3.01	3.71	3.61	58.87	58.33	32.87	29.22	12.79	12.18	7.97	6.94	4.57	5.14	5.89	5.49	6.17	4.67	4.71	6.24	3.33	2.25	3.58	5.87	ORTHOMCL2648	2	2	3	1	0
Solyc01g008610	Beta-1 3-glucanase (AHRD V1 ***- Q9SYX6_TOBAC); contains Interpro domain(s) IPR000490 Glycoside hydrolase, family 17	3.11	2.94	7.88	5.63	0	0	0.86	0.76	0	0	0	0	0	0	0	0	0	0	0	0	0	0	0	0.09	0	0	0	0	ORTHOMCL20923	1	1	0	0	0
Solyc01g008620	Beta-1 3-glucanase (AHRD V1 ***- Q9SYX6_TOBAC); contains Interpro domain(s) IPR000490 Glycoside hydrolase, family 17	0.84	0.93	1.54	1.75	1.26	1.13	31.47	30.09	0.1	0.1	0.24	0.1	0.4	0.4	0	0.53	0.15	0.08	0.37	0.52	0.32	2.34	0.49	1.56	0.88	1.36	0.39	1.11	ORTHOMCL20922	1	1	0	0	0
Solyc01g008640	Cytochrome P450	0	0	0.06	0	0	0	4.09	5.43	0	0	0	0	0	0	0	0	0	0	0	0	0	0	0	0	0	0	0	0	ORTHOMCL329	8	13	0	0	0
Solyc01g008650	Cytochrome P450	0.1	0	0.23	0.23	0	0	15.93	15.44	0	0	0	0	0	0	0	0	0	0	0	0	0	0	0	0	0.11	0	0	0	ORTHOMCL329	8	13	0	0	0
Solyc01g008660	F-box family protein (AHRD V1 ***- B9HCS6_POPTR); contains Interpro domain(s) IPR001810 Cyclin-like F-box	3.02	2.53	3.51	3.06	3.68	3.75	5.39	5.01	6.43	5.98	6.81	5.25	7.72	5.98	7.51	6.79	3.61	2.44	6.61	5.86	3.01	3.71	1.63	1.73	1.51	2.32	1.83	0.9	ORTHOMCL15252	1	0	2	0	0
Solyc01g008670	Cytochrome P450	14.48	12.9	14.48	14.11	6.2	5.55	0.43	0.36	0.28	0.64	0.17	0.07	0.23	0.29	0.08	0.64	0.05	0.11	0.18	0.14	0.08	0	0	0	0	0	0.35	0	ORTHOMCL329	8	13	0	0	0
Solyc01g008680	S2 self-incompatibility locus-linked pollen 3.2 protein (AHRD V1 ***- Q7XAE8_PETIN)	24.14	24.4	11.5	14.27	0.16	0	0.35	0.7	0.2	0.41	1.23	0.21	0.17	0.5	0.45	0.92	2.05	1.47	4.01	4.43	1.36	0.93	0.76	0.65	0.67	0.76	0.61	1.26	ORTHOMCL20921	1	1	0	0	0
Solyc01g008690	GDP-mannose transporter (AHRD V1 **** B2VUF6_PYRTR)	0	0.08	0	0.1	0.18	0.18	7.62	8.66	0.33	0.56	0.81	0	0	0	0	0.1	0	0	0	0	0.37	0.13	0	0	0.09	0	0	0	ORTHOMCL9713	1	1	1	1	1
Solyc01g008700	cDNA clone 001-102-C05 full insert sequence (AHRD V1 **-- B7E7M9_ORYSJ)	12.3	10.92	7.48	6.65	11.04	10.6	4.12	3.22	11.94	11.93	10.04	8.19	9.24	11.53	14.24	15.16	85.17	84.21	28.15	30.01	23.96	35.09	49.59	48.68	35.81	28.31	17.16	18.1	ORTHOMCL9518	1	1	1	1	1
Solyc01g008710	Mannan endo-1 4-beta-mannosidase (AHRD V1 ***- D2S259_HALTV); contains Interpro domain(s) IPR018087 Glycoside hydrolase, family 5, conserved site IPR013781 Glycoside hydrolase, subgroup, catalytic core	0	0	1.58	1.41	0.07	1.84	0	0	0.08	0.08	0	0	0.07	0	1.55	1.35	804.53	787.54	119.45	120.81	1.01	4.34	151.29	159.78	88.02	68.18	0	0	ORTHOMCL6248	2	2	0	0	1
Solyc01g008720	Mannan endo-1 4-beta-mannosidase (AHRD V1 ***- A8FDC6_BACP2); contains Interpro domain(s) IPR001547 Glycoside hydrolase, family 5	0.07	0	0.16	0.08	0	0.08	0	0	0.1	0.1	0	0	0.08	0	0	0	31.03	31.18	3.84	5.49	0	0.23	4.34	6.58	3.59	1.94	0	0	ORTHOMCL6248	2	2	0	0	1
Solyc01g008730	BZIP transcription factor (AHRD V1 **** Q9SQK1_TOBAC); contains Interpro domain(s) IPR011616 bZIP transcription factor, bZIP-1	11.28	12.62	16.72	13.57	7.62	8.98	17.96	16.89	9.32	6.82	9.7	8.1	14.62	11	13.87	14.57	19.92	19.71	13.41	15.51	15.98	15.96	15.78	19.32	19.12	20.79	3.1	3.56	ORTHOMCL20920	1	1	0	0	0
Solyc01g008740	Calcium-dependent protein kinase 17 (AHRD V1 **** Q6KC53_NICPL); contains Interpro domain(s) IPR002290 Serine/threonine protein kinase	5.51	6.01	1.71	2.58	0	0	0	0	0	0	0	0	0.06	0.06	0	0	0	0	0	0	0	0	0	0	0	0	0	0	ORTHOMCL113	8	9	13	4	7
Solyc01g008750	cDNA clone J013074B07 full insert sequence (AHRD V1 *--- B7ECA1_ORYSJ); contains Interpro domain(s) IPR004332 Transposase, MuDR, plant	0.03	0	0	0	0.04	0	0.04	0	0	0	0	0	0	0	0	0	0	0.08	0	0	0	0	0	0	0	0	0	0	ORTHOMCL89	41	2	0	0	1
Solyc01g008760	Genomic DNA chromosome 5 P1 clone MUB3 (AHRD V1 *-*- Q9FLF2_ARATH)	4.94	3.7	2.36	2.64	2.1	2.95	3.28	3.59	6.6	5.7	7.02	4.94	6.07	7.43	5.57	4.37	3.25	4.06	2.82	2.69	7.4	7.88	7.11	6.91	4.57	3.91	3.94	4.34	NA
Solyc01g008770	Rho GTPase activating protein 12 (AHRD V1 *--* Q6P4P5_DANRE); contains Interpro domain(s) IPR000198 RhoGAP	20.36	18.74	15.59	16.84	20.79	20.7	24.07	22.16	26.65	26.24	25.78	21.44	21.27	21.33	17.42	18.13	7.78	9.24	9.64	10.91	13.59	11.85	8.46	8.28	7.66	6.47	13.43	16.15	ORTHOMCL3067	1	1	2	1	2
Solyc01g008780	Phospholipase A22 (AHRD V1 ***- B9SJ74_RICCO); contains Interpro domain(s) IPR016090 Phospholipase A2	39.04	41.31	53.03	55.24	67.67	72.03	18.15	15.28	19.09	16.69	21.85	18.68	31.06	26.41	29.4	30.2	29.3	31.68	59.36	61.76	67.41	68.51	69.26	67.31	73.04	72.2	26.28	35.69	ORTHOMCL12285	1	1	1	1	0
Solyc01g008790	Phosphoesterase family protein (AHRD V1 ***- D7LEV5_ARALY); contains Interpro domain(s) IPR007312 Phosphoesterase	18.01	17.11	5.43	6.53	24.93	26.3	6.38	5.54	59.45	61.93	67.72	58.98	55.36	53.66	41.91	39.84	9.24	9.18	0.53	0.82	39.36	26.23	3.1	3.86	0.51	0.77	16.19	16.83	ORTHOMCL2053	2	1	2	2	2
Solyc01g008800	Tir-nbs-lrr, resistance protein	1.09	1.13	0.82	1.04	2.34	2.26	4.96	4.82	0.83	0.93	1.33	0.85	0.66	0.54	2.03	1.71	1.43	1.68	1.02	0.75	0.33	0.88	0.04	0.31	0.1	0.11	0.39	0.25	ORTHOMCL127	7	31	0	0	0
Solyc01g008810	Zinc finger family protein (AHRD V1 **-- D7LZ79_ARALY); contains Interpro domain(s) IPR018957 Zinc finger, C3HC4 RING-type	29.76	30.68	31.59	32.24	20.02	19.28	23.61	20.64	25.82	28.05	17.59	17.84	31.76	25.96	16.58	16.8	13.93	14.51	8.84	9.67	14.07	16	15.22	14.71	17.01	14.31	7.66	9.04	ORTHOMCL20919	1	1	0	0	0
Solyc01g008820	Signal peptide peptidase family protein (AHRD V1 ***- D7LQE4_ARALY); contains Interpro domain(s) IPR007369 Peptidase A22B, signal peptide peptidase	54.3	52.61	33.72	31.89	35.8	36.73	37.27	38.84	38.81	36.29	26.84	25.88	19.33	17.07	27.58	23.14	38.35	39.12	42.97	41.4	28	24.93	30.05	29.92	26.1	25.24	18.59	26.71	ORTHOMCL2589	2	2	1	1	2
Solyc01g008830	L-ascorbate oxidase (AHRD V1 ***- B9HQ45_POPTR); contains Interpro domain(s) IPR017760 L-ascorbate oxidase, plants	2.38	2.49	4.85	3.8	8.61	8.2	0.06	0	0.41	0.35	0.34	0.22	0.51	0.57	0.46	0.95	0.54	0.78	0.13	0.18	1.62	1.11	0.87	0.67	0.11	0.19	4.16	4.17	ORTHOMCL3038	2	2	2	1	0
Solyc01g008840	COP9 signalosome complex subunit 2 (AHRD V1 ***- B6TIW9_MAIZE); contains Interpro domain(s) IPR013143 PCI/PINT associated module	34.61	33.51	40.79	41.28	23.33	24.44	30.49	31.08	37.04	37.92	35.12	27.86	24.34	26.14	38.56	41.78	40.08	40.74	45.88	47.34	34.28	41.73	44.44	40.78	34.55	33.5	23.4	23.31	ORTHOMCL1872	3	3	1	1	1
Solyc01g008850	CBL-interacting protein kinase 18 (AHRD V1 ***- C4P7W7_VITVI); contains Interpro domain(s) IPR002290 Serine/threonine protein kinase	68.09	66.49	134.29	133.65	62.72	55.79	10.3	9.83	42.29	46.23	44.4	36.51	45.28	46.44	87.24	83.12	96.62	94.65	117.34	116.07	33.66	38.66	44.83	44.88	65.34	61.61	58.54	59.57	ORTHOMCL419	4	4	4	3	4
Solyc01g008860	ATP binding / serine-threonine kinase (AHRD V1 **** C5DB71_VITVI); contains Interpro domain(s) IPR002290 Serine/threonine protein kinase	0	0	0	0	0	0	0	0	0	0	0	0	0	0	0	0	0	0	0	0	0	0	0	0	0	0	0	0	NA
Solyc01g008870	ATP binding / serine-threonine kinase (AHRD V1 **** C5DB71_VITVI); contains Interpro domain(s) IPR002290 Serine/threonine protein kinase	0	0	0	0	0	0	0	0	0	0	0	0	0	0	0.23	0.1	0	0	0	0	0	0	0	0	0	0	0	0	ORTHOMCL20918	1	1	0	0	0
Solyc01g008880	Ethylene responsive transcription factor 1b (AHRD V1 *-*- C0J9I8_9ROSA); contains Interpro domain(s) IPR001471 Pathogenesis-related transcriptional factor and ERF, DNA-binding	0	0.29	0.17	0.17	0	0.33	0	0	0	0	0	0	0	0.16	0.22	0	0.15	0	0	0	0	0	0	0	0.33	0	0	0	NA
Solyc01g008890	Ethylene responsive transcription factor 2a (AHRD V1 *-*- C0J9I7_9ROSA); contains Interpro domain(s) IPR001471 Pathogenesis-related transcriptional factor and ERF, DNA-binding	12.16	13.47	17.32	15.67	11.67	14.04	11.58	11.99	10.77	10.11	10.24	8.49	13.13	12.38	7.43	8.69	6.95	4.69	8.26	8.85	7.6	7.93	6.81	6.37	6.05	6.38	11.95	13.46	ORTHOMCL20917	1	1	0	0	0
Solyc01g008900	Genomic DNA chromosome 3 P1 clone MJL14 (AHRD V1 **-- Q9LJG2_ARATH); contains Interpro domain(s) IPR001926 Pyridoxal phosphate-dependent enzyme, beta subunit	3.12	3.52	2.65	2.03	3.3	4.1	4	3.55	5.36	5.36	5.47	4.68	3.04	3.06	4.24	4.11	3.1	2.92	3.3	4.01	4.44	3.21	6.13	4.92	3.05	2.07	2.95	3.22	ORTHOMCL8545	1	1	1	1	1
Solyc01g008910	Scarecrow transcription factor family protein (AHRD V1 **-* D7MIP9_ARALY); contains Interpro domain(s) IPR005202 GRAS transcription factor	2.35	1.75	6.29	6.59	1.18	1.56	3.68	2.92	1.69	1.77	0.61	0.73	1.4	1.09	1.6	1.72	4.45	5.48	9.99	10.22	9.53	8.64	15.26	14.7	13.77	13.11	0.31	1.05	ORTHOMCL2655	2	2	1	2	1
Solyc01g008920	NAD dependent epimerase/dehydratase family protein expressed (AHRD V1 **-- Q10L97_ORYSJ); contains Interpro domain(s) IPR013120 Male sterility, NAD-binding	5.2	5.2	13.84	13.81	43.46	40.88	0.43	0.43	2.82	2.27	3.65	2.82	3.5	4	4.61	3.8	3.5	2.55	2.39	1.44	9.48	10.98	8.28	9.58	2.96	3.27	35.04	27.65	ORTHOMCL7664	1	1	1	1	1
Solyc01g008930	Phycoerythrobilin ferredoxin oxidoreductase (AHRD V1 **** Q6E5A3_MAIZE); contains Interpro domain(s) IPR009249 Ferredoxin-dependent bilin reductase	11.71	13.85	12.39	9.56	6.73	6.54	2.4	1.73	13	12.24	10.99	7.04	6.81	6.09	6.24	6.14	3.43	3.18	2.81	1.74	7.85	9.21	7.2	7.27	5.75	4.34	12.46	15.93	ORTHOMCL8910	1	1	1	1	1
Solyc01g008940	Anther protein (AHRD V1 ***- Q8RX90_TOBAC)	3.41	3.03	0.79	1.36	14.96	12.35	1.37	1.36	0.32	0	0	0	0	0	0	0	0	0	0	0	2.83	0.73	0	0.51	0.52	0	3.17	2.97	NA
Solyc01g008950	Calmodulin 5/6/7/8-like protein (AHRD V1 ***- Q3HVL6_SOLTU); contains Interpro domain(s) IPR011992 EF-Hand type	272.18	278.63	270.38	262.09	133.26	136.17	259.54	253.41	302.08	282.52	201.83	187.15	230.23	226.97	221.82	214.96	220.61	218.96	138.52	144.85	220.4	222.18	188.69	200.93	155.28	133.81	82.19	86.1	NA
Solyc01g008960	Argonaute 4-like protein (AHRD V1 ***- D5FQ91_PELHO); contains Interpro domain(s) IPR003165 Stem cell self-renewal protein Piwi	121.96	120.18	98.81	101.85	50.34	48.7	154.85	146.74	171.77	164.53	212.11	183.27	239.6	227.82	151.98	145.34	108.83	108.22	56.95	57.94	167.26	170.17	133.27	132.04	108.77	93.24	34.07	40.92	ORTHOMCL304	6	5	4	4	3
Solyc01g008970	Heterogeneous nuclear ribonucleoprotein A3-like protein 2 (AHRD V1 *--- B6TV58_MAIZE); contains Interpro domain(s) IPR000504 RNA recognition motif, RNP-1	132.88	126.98	174.04	172.31	136.7	131.41	207.68	207.46	218.04	207.27	224.51	203.81	352.74	331.2	219.88	227.61	241.64	241.99	118.22	114	88.8	109.54	108.99	92.64	101.53	100.07	99.77	104.47	ORTHOMCL5281	1	1	2	1	1
Solyc01g008980	BZIP transcription factor (AHRD V1 **-- Q32WR6_MALDO); contains Interpro domain(s) IPR011616 bZIP transcription factor, bZIP-1	8.87	8.75	8.48	8.09	6.11	6.83	7.99	6.08	7.61	6.38	6.44	5.3	8.72	9.27	9.44	9.67	11.35	11.87	13.25	12.01	9.35	10.79	10	8.05	12.04	11.01	3.39	2.91	ORTHOMCL20916	1	1	0	0	0
Solyc01g008990	THO complex subunit 7 homolog (AHRD V1 ***- B5XFL3_SALSA); contains Interpro domain(s) IPR018018 Tho complex subunit 7	20.08	20.63	17.51	17.82	11.77	10.02	14.61	13.97	21.94	21.52	19.45	12.55	18.16	20.13	14.55	15.69	13.76	11.38	15.89	14.55	16.26	20.79	23.72	16.97	20.68	20.29	20.42	15.66	ORTHOMCL3444	1	1	2	1	2
Solyc01g009000	RING finger protein 6 (AHRD V1 *--- RNF6_HUMAN); contains Interpro domain(s) IPR018957 Zinc finger, C3HC4 RING-type	20.2	21.65	25.2	23.4	22.53	21.32	34.64	32.67	36.71	35.59	37.13	33.38	55.98	53.81	35.27	34.9	31.1	26.67	24.81	21.81	35.76	31.63	27.88	28.87	37.81	36.34	7.69	8.09	ORTHOMCL5286	1	1	2	1	1
Solyc01g009010	4-diphosphocytidyl-2-C-methyl-D-erythritol kinase (AHRD V1 ***- A4USB3_NICBE); contains Interpro domain(s) IPR004424 4-diphosphocytidyl-2C-methyl-D-erythritol kinase	48.56	49.31	42.37	35.57	26.71	24.39	7.27	7.5	40.28	39.9	26.11	21.69	20.49	19.68	16.31	16.7	35.73	39.18	55.76	53.11	54.72	78.66	142.05	136.54	110.61	95.88	24.56	24.42	ORTHOMCL9515	1	1	1	1	1
Solyc01g009020	Cysteine proteinase inhibitor (AHRD V1 **** Q2VY67_9ERIC); contains Interpro domain(s) IPR000010 Proteinase inhibitor I25, cystatin	159.82	158.56	170.92	174.74	115.97	104.43	114.7	92.56	155.37	157.5	138.21	113.05	159.6	159.31	169.72	180.4	163.84	162.57	75.17	72	470.41	445.12	446.96	396.62	321.89	313.28	50.78	53.16	ORTHOMCL20915	1	1	0	0	0
Solyc01g009030	Nuclear control of ATPase protein (AHRD V1 *--- C9SK53_VERA1); contains Interpro domain(s) IPR013946 Nuclear control of ATP synthase 2	6.44	7.17	4.8	4.62	4.34	3.89	19.32	16.89	13.91	12.24	15.52	12.9	14.6	13.16	14.64	15.12	15.04	13.02	19.77	19.56	15.53	22.85	28.74	27.4	25.82	26.24	4.96	4.77	ORTHOMCL2305	1	1	2	2	2
Solyc01g009040	Cyclin B1 (AHRD V1 **** Q9LD02_TOBAC); contains Interpro domain(s) IPR014400 Cyclin, A/B/D/E	4.51	4.76	1.14	0.7	1.39	1.13	10.12	8.29	6.59	6.2	1.25	0.72	0.73	0.62	0.15	0.19	0	0	0	0	0.46	0.08	0	0.38	0	0	3.69	9.02	ORTHOMCL740	3	3	3	3	2
Solyc01g009050	Molybdenum cofactor biosynthesis protein (AHRD V1 ***- Q309F9_MAIZE); contains Interpro domain(s) IPR005110 MoeA, N-terminal, domain I and II	20.3	18.91	22.62	20.5	21.79	20.67	25.49	24.85	22.14	23.42	22.13	20.13	27.06	25.8	25.56	23.7	26.4	24.91	44.68	43.64	47.46	50.81	44.68	42.84	48.1	55.57	22.12	22.98	ORTHOMCL7140	1	1	1	1	1
Solyc01g009060	BTB/POZ domain containing protein expressed (AHRD V1 ***- Q10C73_ORYSJ); contains Interpro domain(s) IPR013089 Kelch related	12.81	12.76	21.13	19.82	7.68	8.61	20.88	17.4	14.72	14.65	18.97	16.74	17.83	14.9	16.81	18.02	15.97	17.3	21.49	21.07	26.87	26.06	26.22	27.61	25.3	25.45	12.71	13.7	ORTHOMCL1827	2	2	1	2	2
Solyc01g009070	MYB transcription factor (AHRD V1 **-* Q9FR97_ARATH); contains Interpro domain(s) IPR015495 Myb transcription factor	20.77	17.96	18.56	14.73	5.4	4.89	9.35	8.82	4.6	5	8.96	6.74	9.27	10.43	8.15	8.5	5.95	5.51	3.89	4.18	12.48	15.12	9.86	8.62	3.99	3.45	4.56	2.93	ORTHOMCL20914	1	1	0	0	0
Solyc01g009080	FHA domain containing protein (AHRD V1 ***- B6TP39_MAIZE); contains Interpro domain(s) IPR000253 Forkhead-associated	95.19	95.41	71.65	65.41	190.24	195.83	0	0.14	28.08	28.8	23.34	22.8	8.53	7.61	14.22	14.17	19.77	18.05	1.81	1.55	5.96	6.89	11.98	11.01	12.56	11.56	131.09	123.88	ORTHOMCL5422	1	1	1	1	2
Solyc01g009090	Serrate RNA effector molecule homolog (AHRD V1 *-*- SRRT_DROWI)	25.6	23.51	33.52	31.56	18.61	17.57	31.93	35.29	35.56	33.65	27.47	25.73	46.71	44.17	36.05	35.21	35.63	34.91	38.08	39.4	40.37	41.07	37.45	37.83	37.78	43.07	16.86	20.14	ORTHOMCL3576	1	1	1	2	2
Solyc01g009100	Ribosomal protein L30 (AHRD V1 ***- B3TLP4_ELAGV); contains Interpro domain(s) IPR000231 Ribosomal protein L30e	92.5	84.98	69.94	64.49	47.47	44.57	94.47	90.06	179.36	171.65	177.11	148.1	79.01	81.33	81.19	81.39	56.54	59.68	70.17	70.35	41.17	43.1	52.2	50.02	34.18	27.15	89.15	97.09	NA
Solyc01g009110	Histone deacetylase family protein expressed (AHRD V1 ***- Q2QWU2_ORYSJ); contains Interpro domain(s) IPR000286 Histone deacetylase superfamily	6.58	5.68	7.19	8.06	11.41	10.16	3.71	2.94	4.83	5.34	6.17	4.91	9.45	7.41	8.18	8.06	9.63	10.42	16.56	18.53	8.62	6.83	6.81	6.3	15.42	16.62	9.73	9.53	ORTHOMCL4590	1	1	1	2	1
Solyc01g009120	Histone deacetylase family protein expressed (AHRD V1 ***- Q2QWU2_ORYSJ); contains Interpro domain(s) IPR000286 Histone deacetylase superfamily	3.99	4.6	5.23	5.54	11.37	11.72	4.32	3.85	3.38	4.33	4.57	6.44	8.41	9.5	6.34	10.13	7.25	10.11	15.55	13.54	7.59	10.88	3.38	5.76	11.55	12.73	9.86	9.69	ORTHOMCL20913	1	1	0	0	0
Solyc01g009130	Unknown Protein (AHRD V1)	0	0	0	0	0	0	0	0	0	0	0	0	0	0	0	0	0	0	0	0	0	0	0	0	0	0	0	0	NA
Solyc01g009140	Dicer-like protein (AHRD V1 ***- B9HHX6_POPTR)	0	0	0	0	0	0	0	0	0	0	0	0	0	0	0	0	0	0	0	0	0	0	0	0	0	0	0	0	ORTHOMCL20912	2	0	0	0	0
Solyc01g009150	Glycosyl hydrolase (Fragment) (AHRD V1 *-*- D9ZCE7_9CARY)	12.85	12.63	9.24	9.16	7.69	8.92	12.05	9.87	16.31	15.12	16.38	13.74	8.45	10.33	14.13	14.87	7.44	10.55	13.04	12.21	15.14	14.41	9.37	10.03	5.41	6.4	4.13	4.29	ORTHOMCL4403	2	1	1	1	1
Solyc01g009160	Harpin-induced protein-like (Fragment) (AHRD V1 **-- D2CFH8_COFAR); contains Interpro domain(s) IPR010847 Harpin-induced 1	1.63	1.06	1.81	1.51	13.71	15.25	26.64	25.98	9.67	9.28	3.27	3.39	0.68	0.86	32.59	29.54	9.83	10.93	10.56	9.05	1.96	1.42	2.47	2.49	2.22	2.42	0.1	0.32	ORTHOMCL1871	1	2	2	1	3
Solyc01g009170	Ethylene insensitive 3 class transcription factor (AHRD V1 **** D5L146_MALDO); contains Interpro domain(s) IPR006957 Ethylene insensitive 3	23.92	23.11	75.37	77.48	42.98	42.47	108.12	100.8	14.8	16.73	29.2	26.8	54.85	51.63	98.43	98.34	127.64	122.78	62.42	61.84	117.02	94.63	56.16	60.34	26.37	32.23	18.38	10.61	ORTHOMCL723	4	4	2	2	2
Solyc01g009180	5-methyltetrahydropteroyltriglutamate--homocysteine methyltransferase (AHRD V1 ***- B6UF55_MAIZE); contains Interpro domain(s) IPR006276 5-methyltetrahydropteroyltriglutamate--homocysteine S-methyltransferase	12.05	11.77	16.8	16.95	10.53	11.17	18.08	17.17	14.88	13.05	18.23	14.98	11.39	9.95	15.94	17.03	20.83	22.22	28.64	28.49	19.41	18.82	20.89	23.4	24.98	21.54	11.31	12.77	ORTHOMCL1130	2	2	3	2	2
Solyc01g009190	Double-stranded RNA binding protein (AHRD V1 *-** A9T6E4_PHYPA); contains Interpro domain(s) IPR001159 Double-stranded RNA binding	0.26	0.53	0.07	0	0	0.15	0.08	0.08	0	0	0	0	0.07	0	0	0	0	0	0	0	0	0.1	0	0	0	0	0	0	ORTHOMCL20911	1	1	0	0	0
Solyc01g009200	Restricted tev movement 2 (AHRD V1 *--- D5K219_ARATH); contains Interpro domain(s) IPR008978 HSP20-like chaperone	2.74	3.89	1.85	1.8	2.8	3.37	6.79	6.99	1.84	2.23	1.8	1.04	2.53	2.45	0.82	0.45	0.19	0.1	0	0.08	0.82	1.55	0.93	0.59	0.2	0.12	3.2	3.07	ORTHOMCL20910	1	1	0	0	0
Solyc01g009210	Unknown Protein (AHRD V1)	0.46	0	0	0	0	0	0	0	0	0	0	0	0	0	0	0	0	0	0	0	0	0	0	0	0	0	0	0	ORTHOMCL20909	1	1	0	0	0
Solyc01g009220	Restricted tev movement 2 (AHRD V1 *--- D5K205_ARATH); contains Interpro domain(s) IPR008978 HSP20-like chaperone	1.36	1.61	0.49	0.88	2.61	1.21	1.51	0.5	1.16	1.62	0.18	0.93	0.96	0.48	0.16	0	0	0	0	0	0.33	0	0	0.23	0	0	3.21	2.88	ORTHOMCL21164	1	0	0	0	1
Solyc01g009230	Xanthine dehydrogenase/oxidase (AHRD V1 ***- A9YL93_RABIT); contains Interpro domain(s) IPR016208 Aldehyde oxidase/xanthine dehydrogenase	1.86	1.76	2.8	2.41	7.72	7.79	10.54	10.5	2.9	3.11	5.1	4.79	4.38	4.2	5.39	5.72	3.74	3.54	1.77	1.88	6.05	6.24	3.5	3.7	0.36	0.38	8.65	9.18	ORTHOMCL223	7	8	4	5	3
Solyc01g009240	Beta-D-glucosidase (AHRD V1 ***- O82074_TROMA); contains Interpro domain(s) IPR001764 Glycoside hydrolase, family 3, N-terminal	65.35	68.99	15.47	14.57	0.22	0.22	0.09	0.28	0	0.05	0	0	0.13	0.09	0.06	0.2	0	0.09	0	0.04	0	0	0	0	0	0	0.11	0	ORTHOMCL101	10	10	8	9	5
Solyc01g009250	Unknown Protein (AHRD V1)	6.21	4.08	10.36	10.66	1.06	0.68	0.42	0.56	0.65	0.66	1.19	0.35	0.94	1.62	1.26	1.64	1.02	0.92	0.1	0.22	0	0.37	0	0.26	0.27	0.15	0.16	0	ORTHOMCL20908	1	1	0	0	0
Solyc01g009260	60S ribosomal protein L5, mitochondrial (AHRD V1 *-*- RM05_SOLTU)	0	0	0	0	0.55	1.18	0.36	0.65	0	0.08	0	0.09	0	0	0	0	0	0	0	0	0	0	0	0	0	0	0.08	0	ORTHOMCL2203	2	2	1	1	2
Solyc01g009270	Unknown Protein (AHRD V1)	0	0.06	0	0.14	0.14	0.07	0	0.07	0	0	0	0	0	0	0	0	0	0	0	0	0	0.1	0	0	0	0	0	0	ORTHOMCL2203	2	2	1	1	2
Solyc01g009280	Serine/threonine-protein phosphatase (AHRD V1 **** D7LGU6_ARALY); contains Interpro domain(s) IPR012391 Serine/threonine protein phosphatase, BSU1	11.78	12.64	14.62	14.47	11.72	11.75	18.59	18.63	12.91	11.3	12.2	11.83	14.28	13.4	17.63	18.6	14.47	14.61	16.29	17.53	21.72	21.67	17.38	17.27	16.6	18.99	10.22	8.71	ORTHOMCL529	4	4	4	3	2
Solyc01g009290	Polyribonucleotide 5&apos;-hydroxyl-kinase Clp1 (AHRD V1 **** CLP1_CHICK); contains Interpro domain(s) IPR010655 Pre-mRNA cleavage complex II Clp1	12.25	11.92	14.41	13.77	6.26	5.52	13.98	15.08	12.67	11.22	10.61	8.62	10.7	11.68	10.94	10.74	11.28	11.37	15.23	14.67	15.07	14.89	13.18	13.62	16.2	14.81	5.44	8.61	ORTHOMCL9007	1	1	1	1	1
Solyc01g009300	Serine/threonine kinase (AHRD V1 *-** C4QNN2_SCHMA); contains Interpro domain(s) IPR002290 Serine/threonine protein kinase	7.6	7.04	12.18	11.62	7.28	6.9	57.97	58.69	13.39	13.79	39.51	33.87	53.57	50.75	36.25	34.83	15.1	14.54	12.05	11.77	17.19	20.92	5.73	6.78	1.7	1.47	3.88	1.5	ORTHOMCL8469	1	1	1	1	1
Solyc01g009310	Sterol reductase (AHRD V1 **** A8IA67_CHLRE); contains Interpro domain(s) IPR001171 Ergosterol biosynthesis ERG4/ERG24	56.34	56.32	41.32	40.87	47.28	44.79	116.75	116.77	98.5	97.56	117.23	96.05	103.81	100.28	133.92	125.23	55.67	54.99	65.58	65	93.44	90.82	72.69	74.07	51.85	50.03	37.43	39.54	ORTHOMCL3786	2	2	1	1	1
Solyc01g009320	U-box domain-containing protein 24 (AHRD V1 ***- D7LAS1_ARALY); contains Interpro domain(s) IPR003613 U box domain	0	0	0.24	0	0	0	0.16	0	0	0	0	0	0	0	0	0	0	0	0	0.06	0	0	0	0	0	0	0	0	ORTHOMCL12695	1	1	1	1	0
Solyc01g009330	U-box domain-containing protein (AHRD V1 ***- D7LU64_ARALY); contains Interpro domain(s) IPR003613 U box domain	0	0.27	0.15	0.08	0.15	0.15	0.48	0.48	0	0	0	0	0	0	0	0	0	0	0	0	0	0	0	0	0	0	0	0	ORTHOMCL14709	1	1	0	1	0
Solyc01g009340	Calmodulin-binding protein family-like (AHRD V1 **-* Q6YXT2_ORYSJ); contains Interpro domain(s) IPR000048 IQ calmodulin-binding region	2.68	2.04	1.09	1.05	1.13	1.01	0.97	0.9	2.68	2.81	0.63	1.29	0.64	0.94	0.87	0.32	0.2	0.21	0.06	0.06	0.97	0.3	0.33	0.35	0.14	0.16	1.57	3.62	ORTHOMCL20907	1	1	0	0	0
Solyc01g009350	CCR4-NOT transcription complex subunit 7 (AHRD V1 ***- B4FG48_MAIZE); contains Interpro domain(s) IPR006941 Ribonuclease CAF1	0.66	1.1	0	0	0	0	0	0.1	0	0	0	0	0	0	0	0	0	0	0	0	0	0	0	0	0	0	0	0	NA
Solyc01g009360	CCR4-NOT transcription complex subunit 7 (AHRD V1 ***- B4FG48_MAIZE); contains Interpro domain(s) IPR006941 Ribonuclease CAF1	0	0	0	0	0	0	0	0	0	0	0	0	0	0	0	0	0	0	0	0	0	0	0.18	0	0	0	0	0	ORTHOMCL13943	1	2	0	0	0
Solyc01g009370	Cytochrome P450	0.17	0.34	0.52	1.01	0	0	16.74	17.66	0	0	0	0.17	0	0.06	0.09	0	0	0	0	0	0.09	0	0	0.13	0.13	0.07	0	0	ORTHOMCL719	5	6	1	1	1
Solyc01g009380	Nicalin (AHRD V1 ***- B4FZF8_MAIZE); contains Interpro domain(s) IPR008710 Nicastrin	5.99	6.37	5.57	5.31	10.78	7.79	11.7	11.06	7.69	8.7	7.57	7.01	7.42	7.93	8.55	8.13	7.63	7.18	8.7	9.82	11.11	9.5	9.1	9.75	11.68	7.86	10.03	5.9	ORTHOMCL3319	2	2	1	1	1
Solyc01g009390	MRNA decapping enzyme (AHRD V1 *-*- Q45NB8_XENLA); contains Interpro domain(s) IPR010334 Dcp1-like decapping	5.92	4.98	8.05	8.88	3.39	3.71	12.23	12.27	4.07	3.97	6.56	6.77	9.08	7.6	10.06	7.88	14.42	14.87	15.51	14.22	12.12	12.37	11.16	12.46	16.06	15.43	3.17	0.8	ORTHOMCL20906	1	1	0	0	0
Solyc01g009400	Peroxidase 57 (AHRD V1 ***- D7LXN0_ARALY); contains Interpro domain(s) IPR002016 Haem peroxidase, plant/fungal/bacterial	0	0	0	0	0	0	4.67	5.36	0	0	0	0	0	0	0	0	0	0	0	0	0	0	0	0	0	0	0	0	ORTHOMCL1694	2	2	1	1	3
Solyc01g009410	Peroxidase 57 (AHRD V1 **** D7LXN0_ARALY); contains Interpro domain(s) IPR002016 Haem peroxidase, plant/fungal/bacterial	0	0	0	0	0	0	14.38	14.76	0	0	0	0	0	0	0	0	0	0	0	0	0	0	0	0	0	0	0	0	ORTHOMCL1694	2	2	1	1	3
Solyc01g009420	Bifunctional polymyxin resistance arnA protein (AHRD V1 ***- B6TQB1_MAIZE); contains Interpro domain(s) IPR001509 NAD-dependent epimerase/dehydratase	109.43	99.15	70.17	72.64	80.51	79.41	137.85	136.79	252.11	242.48	347.16	297.74	343.35	323.81	316.76	315.69	255.12	260.26	158.81	154.69	344.85	305.72	237.33	238.95	237.64	288.91	85.76	71.44	ORTHOMCL1262	3	2	2	3	1
Solyc01g009430	Os02g0448600 protein (Fragment) (AHRD V1 *--- Q0E1G8_ORYSJ)	86.06	82.69	162.39	155.16	23.17	26.93	26.69	26.56	58.28	55.69	118.23	103.08	239.68	229.53	281.12	284.2	605.49	596	209.19	214.95	433.06	454.14	195.18	172.85	53.28	63.83	2.5	2.15	ORTHOMCL5365	2	1	1	1	1
Solyc01g009440	Ethylene-responsive transcription factor 10 (AHRD V1 *-** ERF77_ARATH); contains Interpro domain(s) IPR001471 Pathogenesis-related transcriptional factor and ERF, DNA-binding	0.81	0.83	0	0	0	0	0	0	0	0	0	0.2	0	0	0	0	0	0	0	0	0	0	0	0	0	0	0	0	ORTHOMCL6338	1	1	0	2	1
Solyc01g009450	Mitochondrial inner membrane protease ATP23 (AHRD V1 ***- D0NY32_PHYIN); contains Interpro domain(s) IPR019165 Peptidase M76, ATP23	75.96	70.67	82.37	80.48	75.36	72.71	107.42	108.53	79.8	83.26	97.49	87.08	158.25	155.1	145.1	149.18	223.59	224.33	104.6	98.46	44.67	50.83	40.82	42.5	29.97	35.54	10.66	14.84	ORTHOMCL5167	1	1	1	1	2
Solyc01g009460	Unknown Protein (AHRD V1)	0	0	0	0	0	0	0	0	0	0	0	0	0	0	0	0	0	0	0	0	0	0	0	0	0	0	0	0	NA
Solyc01g009470	Poly (AHRD V1 ***- B9SCR8_RICCO); contains Interpro domain(s) IPR012317 Poly(ADP-ribose) polymerase, catalytic region	0	0.07	0	0	0	0	0.13	0.04	0	0	0	0	0	0	0	0	0	0	0	0	4.65	0.44	1.04	1.44	1.4	0.54	0	0	ORTHOMCL3032	2	2	1	1	1
Solyc01g009480	Hydrolase alpha/beta fold family protein (AHRD V1 **** D7LRW3_ARALY); contains Interpro domain(s) IPR000073 Alpha/beta hydrolase fold-1	5.06	4.06	17.36	19.78	0.36	0.3	1.54	1.69	0	0.09	0	0	0.07	0.07	0	0.24	0	0.07	0	0	0	0	0.11	0.5	0.07	0	0	0	ORTHOMCL20905	1	1	0	0	0
Solyc01g009490	cDNA clone J100026I16 full insert sequence (AHRD V1 **-- B7FA06_ORYSJ)	0	0	0	0	0	0	0	0	0	0	0	0	0	0	0	0	0	0	0	0	0	0	0	0	0	0	0	0	ORTHOMCL20904	1	1	0	0	0
Solyc01g009500	Hydrolase alpha/beta fold family protein (AHRD V1 **** D7LRW3_ARALY); contains Interpro domain(s) IPR000073 Alpha/beta hydrolase fold-1	6.83	7.37	9.13	7.47	9.63	11.3	12.98	11.41	4.99	4.46	4.01	3.33	3.46	3.66	6.71	5.54	2.68	3.51	3.11	3.68	4.85	6.27	4.05	3.49	3.16	3.57	9.9	7.56	ORTHOMCL20903	1	1	0	0	0
Solyc01g009510	Unknown Protein (AHRD V1); contains Interpro domain(s) IPR011616 bZIP transcription factor, bZIP-1	0	0	0	0	0	0	0	0	0	0	0	0	0	0	0	0	0	0	0	0	0	0	0	0	0	0	0	0	NA
Solyc01g009520	Ribosomal protein (AHRD V1 ***- Q6ER67_ORYSJ); contains Interpro domain(s) IPR002143 Ribosomal protein L1	99.37	93.5	65.19	69.09	58.51	58.14	116.25	103.62	231	223.57	157.87	142.44	188.7	178.62	166.01	162.09	112.47	114.32	92.03	89.2	64.15	74.63	63.12	61.39	48.33	42.64	77.03	91.35	ORTHOMCL1261	3	3	3	1	1
Solyc01g009530	Genomic DNA chromosome 3 TAC clone K7P8 (AHRD V1 *--- Q9LRY2_ARATH)	0	0	0	0	0	0	0.16	0	0	0	0	0	0	0.15	0	0	0	0	0	0	0	0	0	0	0.3	0.17	0	0	NA
Solyc01g009540	Genomic DNA chromosome 3 TAC clone K7P8 (AHRD V1 ***- Q9LRY2_ARATH)	0	0	0	0	0	0	0	0	0	0	0	0	0	0	0	0	0	0	0	0	0	0	0	0	0	0	0	0	NA
Solyc01g009550	Hypothetical chloroplast RF1 (AHRD V1 ***- C3UP30_9MAGN)	0	0	0	0	0	0	0	0	0	0.45	0	0.48	0.37	0.37	0	0.41	0	0	0.29	0	2.01	0	0	0.72	0.37	0	0	0	NA
Solyc01g009560	Terminal flower 1 (Fragment) (AHRD V1 **-- B3VT07_9ROSA); contains Interpro domain(s) IPR008914 Phosphatidylethanolamine-binding protein PEBP	0	0	0	0	0	0	0.97	0.78	0	0	0	0	0	0	0	0	0	0	0	0	0	0	1.98	1.45	18.99	14.53	0	0	NA
Solyc01g009570	Unknown Protein (AHRD V1)	18.7	17.59	12.8	12.63	36.24	32.03	0	0	2.72	1.69	0.51	0.67	0.17	0	0	0.19	0	0	0	0	0	0	0	0	0	0	4	4.15	NA
Solyc01g009580	Terminal flower 1 (Fragment) (AHRD V1 **-- B3VT07_9ROSA); contains Interpro domain(s) IPR008914 Phosphatidylethanolamine-binding protein PEBP	0.51	0.52	0	0	0	0	2.45	2.6	0	0.18	0	0	0.15	0	0	0	0	0	0	0	0.59	0.41	0.22	0	2.2	1.66	0	0	ORTHOMCL14898	1	1	0	1	0
Solyc01g009590	A9-like protein (Fragment) (AHRD V1 **-- A4L798_SINAL); contains Interpro domain(s) IPR003612 Plant lipid transfer protein/seed storage/trypsin-alpha amylase inhibitor	999.89	978.56	0	0	0	0	0	0	0	0	0	0	0	0	0.25	0	0.17	0	0	0	0	0	0	0	0	0	0	0	ORTHOMCL20902	1	1	0	0	0
Solyc01g009600	Dehydration-responsive family protein (AHRD V1 **-- D7M5L0_ARALY); contains Interpro domain(s) IPR004159 Protein of unknown function DUF248, methyltransferase putative	17.17	15.31	13.08	12.78	0.05	0	0.05	0	0	0	0	0	0.09	0.09	0.06	0.1	0	0	0	0	0	0	0	0	0	0	0	0	ORTHOMCL104	10	10	7	7	8
Solyc01g009610	Unknown Protein (AHRD V1)	32.76	27.77	23.06	21.46	32.36	29.96	31.5	29.3	62.62	62.35	47.83	39.15	39.19	40.12	36.88	36.56	15.11	16.55	12.12	12.13	27.08	18.87	9.84	12.12	9.35	10.83	27.81	29.76	ORTHOMCL20901	1	1	0	0	0
Solyc01g009620	Cleavage and polyadenylation specificity factor subunit 5 (AHRD V1 ***- C1BVK1_9MAXI); contains Interpro domain(s) IPR016706 Cleavage and polyadenylation specificity factor, 25 kDa subunit	16.58	18.85	14.35	11.5	9	9.57	15.66	11.84	36.78	39.27	30.46	26.39	28.12	25.04	22.96	22.09	22.48	18.53	34.5	34.8	29.59	25.76	42.35	37.43	38.69	34.69	5.9	9.71	NA
Solyc01g009630	Cleavage and polyadenylation specificity factor subunit 5 (AHRD V1 ***- C1BVK1_9MAXI); contains Interpro domain(s) IPR016706 Cleavage and polyadenylation specificity factor, 25 kDa subunit	22.68	22.61	22.66	21.84	21.92	22.66	27.75	24.23	38.99	40.86	33.11	26.59	30.78	30.21	28.78	25.7	30.29	30.56	48.23	51.2	26.65	31.22	56.46	46.25	59.7	50.86	23.12	31.29	ORTHOMCL20900	1	1	0	0	0
Solyc01g009640	Polygalacturonase (AHRD V1 ***- C0JAE6_9ORYZ); contains Interpro domain(s) IPR012334 Pectin lyase fold	0	0	0	0	0	0	0	0	0	0	0	0	0	0	0	0	0	0	0	0	0	0	0	0	0	0	0	0	ORTHOMCL11249	1	3	0	0	0
Solyc01g009650	MYB transcription factor (AHRD V1 **-- Q9LTJ5_ARATH); contains Interpro domain(s) IPR015495 Myb transcription factor	0	0	0	0	0	0.36	0.37	0.37	0	0	0	0	0	0	0	0	0	0	0	0	0	0	0	0	0	0	0	0	NA
Solyc01g009660	Low-temperature-induced 65 kDa protein (AHRD V1 *-*- LTI65_ARATH)	0	0	0	0	0	0	0	0	0	0	0	0	0	0	0	0	0	0	0	0	23.13	7.06	3.88	6.93	6.79	0.77	0	0	NA
Solyc01g009670	CCA-adding enzyme (AHRD V1 *-*- CCA_STAES); contains Interpro domain(s) IPR002646 Polynucleotide adenylyltransferase region	1.7	1.11	2.16	1.3	9.3	8.69	0.93	1.11	2.72	1.96	2.01	0.76	1.24	0.89	0.72	0.79	0.28	0.17	0.14	0.05	0.48	0.58	0.36	0.17	0.06	0.07	9.35	16.97	ORTHOMCL3304	2	1	2	1	1
Solyc01g009680	Lipoxygenase (AHRD V1 ***- C0KKU8_SOLLC); contains Interpro domain(s) IPR001246 Lipoxygenase, plant	32.5	33.24	11.18	12.22	65.84	62.83	0	0.07	1.42	1.69	1.32	1.68	0.69	0.28	0.09	0.38	2.02	2.23	6.57	6.61	17.64	13.43	27.69	16.69	9.96	10.02	3.44	4.61	ORTHOMCL21	17	20	6	15	12
Solyc01g009690	LRR receptor-like serine/threonine-protein kinase, RLP	0.79	0.81	0.99	1.02	0.74	1.14	5.99	4.49	0	0	0.44	0.29	0.15	0.08	0.86	1	0.25	0.18	0.38	0.46	3.32	2.57	4.38	5.45	1.85	1.88	1.47	0.67	ORTHOMCL14	23	47	0	8	0
Solyc01g009700	LRR receptor-like serine/threonine-protein kinase, RLP	0.51	0.39	0.24	0.5	0.95	0.73	0.86	1.31	0.06	0.06	0.07	0.06	0.1	0.15	0.52	0.32	0.23	0.05	0.41	0.16	2.03	3.16	5.76	5.52	1.89	1.26	1.29	0.06	ORTHOMCL14	23	47	0	8	0
Solyc01g009710	Unknown Protein (AHRD V1)	0	0	0	0	0	0	0	0	0	0	0	0	0	0	0	0	0	0	0	0	0	0	0	0	0	0	0	0	NA
Solyc01g009720	Zinc finger family protein (AHRD V1 *-*- D7LC67_ARALY)	0.42	0.26	0.39	0.2	0.76	0.97	3.33	3.83	0	0.47	0	0.12	0	0	0.13	0	0.09	0	0.07	0	0.13	0	0	0.19	0.29	0	0.47	0.12	ORTHOMCL13271	1	0	1	1	1
Solyc01g009730	Unknow protein (AHRD V1 *-*- Q5W7C9_ORYSJ); contains Interpro domain(s) IPR010399 Tify	0.08	0.09	0	0	0	0	0	0	0	0	0	0	0	0	0	0	0	0	0	0	0	0	0	0	0	0	0.12	0	ORTHOMCL13942	3	0	0	0	0
Solyc01g009740	Unknown Protein (AHRD V1); contains Interpro domain(s) IPR010399 Tify	0	0	0.05	0.11	0	0	0	0	0	0	0	0	0	0	0	0	0	0	0	0	0	0	0	0	0	0	0	0	ORTHOMCL13942	3	0	0	0	0
Solyc01g009750	Unknown Protein (AHRD V1)	70.83	71.78	89.09	92.59	49.94	49	76.35	73.86	80.53	86.17	81.5	73.64	102.38	100.81	144.21	140.03	137.74	141.17	180.27	177.08	119.32	132.48	92.38	88.48	86.82	80.4	17.88	17.2	NA
Solyc01g009760	GRAM-containing/ABA-responsive protein (Fragment) (AHRD V1 *--- C6FBQ3_PSEMZ); contains Interpro domain(s) IPR004182 GRAM	1.89	1.56	2.61	3.98	2.96	2.7	6.48	7.55	0.87	0.63	0.46	0.8	0.21	0.21	1.66	1.83	1.07	1.52	0.48	0.75	3.91	3.88	3.47	3.63	2.28	1.87	2.89	3.52	NA
Solyc01g009770	Major ampullate spidroin 2-2 (AHRD V1 *-*- B6TJV0_MAIZE); contains Interpro domain(s) IPR001202 WW/Rsp5/WWP	8.62	8.72	1.76	1.81	1.5	3.39	18.42	20.44	12.87	10.91	5.13	5.17	3.48	3.61	2.77	2.29	5.14	6.07	3.2	2.45	0	0.6	5.98	5.31	11.13	9.38	3.57	5.49	ORTHOMCL10511	1	0	2	1	1
Solyc01g009780	LITAF-domain-containing protein (AHRD V1 ***- Q4U6G1_PEA); contains Interpro domain(s) IPR006629 LPS-induced tumor necrosis factor alpha factor	30.3	35.52	49.18	51.53	21.9	22.2	29.01	32.95	28.42	27.74	20.89	19.95	26.46	23.38	43.52	43.49	30.93	32.71	62.97	62.84	19.83	20.92	25.51	24.78	36.65	39.13	10.09	6.04	ORTHOMCL12128	1	0	1	1	1
Solyc01g009790	Unknown Protein (AHRD V1)	0	0	0	0	0	0	0	0	0	0	0	0	0	0	0	0	0	0	0	0	0	0	0	0	0	0	0	0	NA
Solyc01g009800	Mutator-like transposase 53847-56139 (AHRD V1 ***- Q9C8V7_ARATH); contains Interpro domain(s) IPR018289 MULE transposase, conserved domain	0	0	0	0	0	0	0	0	0	0	0	0	0	0	0	0	0	0	0	0	0	0	0	0	0	0	0	0	ORTHOMCL122	38	1	0	0	0
Solyc01g009810	LRR receptor-like serine/threonine-protein kinase, RLP	0	0.15	0	0.17	0.32	0.49	2.05	0.68	0.39	0	0.96	0.21	0	0	0.66	0.72	0	0	0.51	0.39	0	0.45	0	0	0	0	0	0	NA
Solyc01g009820	Hydroxyproline-rich glycoprotein family protein (AHRD V1 ***- D7LGA9_ARALY)	6.28	5.93	23.16	20.81	6.28	6.82	13.51	12.12	5.1	5.06	9.06	6.79	9.38	8.58	15.51	16.72	14.68	15.2	17.58	17.55	19.11	21.48	21.17	22.52	29.4	27.16	9.28	5.33	ORTHOMCL2526	2	1	1	2	2
Solyc01g009830	UDP-glucuronic acid/UDP-N-acetylgalactosamine transporter (AHRD V1 **** C1BM09_OSMMO); contains Interpro domain(s) IPR004853 Protein of unknown function DUF250	0.51	0.45	0.34	0.44	0	0.08	6.41	4.56	0	0	0.12	0	0.42	0.51	4.06	3.63	0.16	0.08	0	0.07	2.73	1.75	0.13	0.16	0.25	0	0	0	ORTHOMCL3147	2	1	1	2	1
Solyc01g009840	GAI-like protein 1 (Fragment) (AHRD V1 **-- A1YWS4_9ROSI); contains Interpro domain(s) IPR005202 GRAS transcription factor	0	0	0	0	0	0	0	0.41	0	0	0	0	0.13	0	0	0	0.12	0	0	0	0.18	0	0	0	0	0.15	0.31	0.49	NA
Solyc01g009850	Unknown Protein (AHRD V1)	32.11	30.35	20.82	19.61	13.2	12.81	13.92	14.21	31.92	28.99	14.59	12.33	11.04	11.59	10.88	10.1	14.09	11.62	13.87	14.49	13.58	13.28	15.03	13.89	12.92	12.81	7.8	9.2	ORTHOMCL13276	1	0	1	1	1
Solyc01g009860	NAC domain transcription factor (AHRD V1 **** Q5DM36_WHEAT); contains Interpro domain(s) IPR003441 No apical meristem (NAM) protein	23.55	23.84	115.49	114.2	122.79	119.34	89.36	96.17	30.8	30.18	29.8	27.41	18.48	17.36	16.55	16.28	29.68	34.27	3.09	3.05	11.55	16.49	25.06	27.58	15.51	13.99	25.93	23.23	ORTHOMCL12129	1	0	1	1	1
Solyc01g009870	Glycerophosphodiester phosphodiesterase GDE1 (AHRD V1 ***- B2WNF5_PYRTR); contains Interpro domain(s) IPR004129 Glycerophosphoryl diester phosphodiesterase	10.39	11.07	3.38	3.09	0.12	0	0.32	0.39	20.37	17.86	24.34	21.84	43.24	45.43	21.65	18.62	0.53	0.91	2.78	2.94	11.71	7.05	0.19	0.9	1.55	0.84	0	0	NA
Solyc01g009880	Exocyst complex protein EXO70 (AHRD V1 *--- EXO70_KLULA); contains Interpro domain(s) IPR004140 Exo70 exocyst complex subunit	2.19	1.79	0.69	0.57	0	0	0	0	0	0	0	0	0	0	0	0	0	0	0	0	0	0	0	0	0	0	0	0	ORTHOMCL1336	3	2	2	1	2
Solyc01g009890	Glutaredoxin (AHRD V1 ***- B9GZC7_POPTR); contains Interpro domain(s) IPR011905 Glutaredoxin-like, plant II	0.22	0.44	0.25	0	0	0.5	0	0	0	0	0	0	0	0	0	0	0	0	0	0	0	0	0	0	0	0	0	0	ORTHOMCL13941	3	0	0	0	0
Solyc01g009900	Glutaredoxin (AHRD V1 ***- B9GF65_POPTR); contains Interpro domain(s) IPR011905 Glutaredoxin-like, plant II	1.09	1.11	5.27	5.42	0.21	0.84	0	0	0.5	0.25	0	0	0	0	0	0	0	0	0	0	0	0	0	0	0	0	0.25	1.31	ORTHOMCL13941	3	0	0	0	0
Solyc01g009910	Glutaredoxin (AHRD V1 ***- B9GF65_POPTR); contains Interpro domain(s) IPR011905 Glutaredoxin-like, plant II	0	0.96	0.55	0	0	0	0	0	0	0	0	0	0	0	0	0	0	0	0	0	0	0	0	0	0	0	0	0	ORTHOMCL13941	3	0	0	0	0
Solyc01g009920	MORC family CW-type zinc finger 3 (AHRD V1 *--- Q0D2C9_XENTR); contains Interpro domain(s) IPR003594 ATP-binding region, ATPase-like	0.7	0.56	0.04	0.04	0	0	0	0	0	0	0	0	0	0	0	0	0	0	0	0	0	0.06	0.13	0.25	2.28	2.58	0	0	ORTHOMCL1728	3	2	2	1	1
Solyc01g009930	LRR receptor-like serine/threonine-protein kinase, RLP	0	0	0.06	0.06	0.28	0.11	0.82	1.16	0	0.07	0.08	0.07	0	0.11	0.15	0.25	0.05	0	0	0	0	0	0	0	0	0	0	0	NA
Solyc01g009940	5-methylthioadenosine/S-adenosylhomocysteine deaminase (AHRD V1 **-- C0QS54_PERMH); contains Interpro domain(s) IPR006680 Amidohydrolase 1	0	0	0	0	0	0	0	0	0	0	0	0	0	0	0	0	0	0	0	0	0	0	0	0	0	0	0	0	ORTHOMCL14906	1	0	0	1	1
Solyc01g009950	Polyprotein-like related (AHRD V1 ***- Q2AA73_ASPOF)	0	0	0	0	0	0.21	0.22	0	0	0	0	0	0	0	0	0	0	0	0	0	0.29	0.29	3.54	2.67	5.07	4.07	0	0	ORTHOMCL13940	3	0	0	0	0
Solyc01g009960	Stearoyl-acyl-carrier protein desaturase (AHRD V1 **** C0KWD3_RICCO); contains Interpro domain(s) IPR005067 Fatty acid desaturase, type 2	0.8	0.24	0.74	0.57	0	0	0	0	0	0	0	0	0	0	0	0	0	0	0	0	0	0	0	0	0.18	0	0	0	NA
Solyc01g009970	Amidohydrolase 2 (AHRD V1 ***- Q01SB2_SOLUE); contains Interpro domain(s) IPR006992 Amidohydrolase 2	13.66	13.61	12.67	11.52	22.45	20.71	9.61	8.37	19.35	18.77	18.34	15.09	17.75	17.44	11.5	9.95	12.28	13.12	20.66	21.7	11.88	14.41	22.37	19.08	24.33	24.78	32.32	40.22	ORTHOMCL12868	1	0	1	1	1
Solyc01g009980	Retrotransposon like protein (AHRD V1 ***- Q67Y86_ARATH)	0	0	0	0	0	0	0	0	0	0	0	0	0	0	0	0	0	0	0	0	0	0	0	0	0	0	0	0	NA
Solyc01g009990	Peptidyl-prolyl cis-trans isomerase (AHRD V1 ***- B9RMA5_RICCO); contains Interpro domain(s) IPR002130 Peptidyl-prolyl cis-trans isomerase, cyclophilin-type	125.73	122.98	83.95	81.44	120.96	121.21	31.01	28.41	171.28	175.28	152.91	124.74	82.27	75.77	63.57	59.3	57.56	60.47	97.9	103.65	77.05	67.97	99.51	98	101.95	107.42	419.61	553.93	ORTHOMCL12132	1	0	1	1	1
Solyc01g010000	ACT domain-containing protein (AHRD V1 **-- D7M3X3_ARALY); contains Interpro domain(s) IPR002912 Amino acid-binding ACT	12.33	10.18	14.93	14.88	12.54	12.6	18.32	16.84	6.37	5.89	5.05	4.92	6.2	5.6	5.06	5.59	9.05	8.35	7.82	8.41	8.09	6.94	8.86	7.58	12.05	10.14	7.54	9.37	ORTHOMCL14905	1	0	0	1	1
Solyc01g010010	Mutator-like transposase (AHRD V1 ***- Q9SKM2_ARATH); contains Interpro domain(s) IPR004332 Transposase, MuDR, plant	0.11	0.23	0	0	0	0.13	0.14	0.28	0	0	0	0	0.13	0	0	0	0	0	0	0	0	0	0	0	0	0	0	0	ORTHOMCL13939	3	0	0	0	0
Solyc01g010020	Calmodulin (AHRD V1 ***- B6SJJ2_MAIZE); contains Interpro domain(s) IPR003299 Flagellar calcium-binding protein (calflagin)	11.29	11.39	3.71	3.62	6.49	6.71	18.56	17.46	2.84	2.41	2.22	1.93	1.31	1.32	4.54	5.41	2.93	2.12	0.95	0.83	3.05	2.22	1.29	3.02	0.75	0.96	6.16	6.64	ORTHOMCL2732	2	1	2	1	2
Solyc01g010030	Receptor-like protein kinase At3g21340 (AHRD V1 *-*- RLK6_ARATH); contains Interpro domain(s) IPR002290 Serine/threonine protein kinase	5.03	4.53	5.48	5.94	5.9	6.59	14.76	15.12	5.94	6.32	5.76	3.29	3.62	2.74	2.62	2.16	2.27	2.67	2.87	2.55	2.92	2.6	1.8	2.22	2.33	2.4	8.25	7.75	NA
Solyc01g010040	S-adenosylmethionine decarboxylase uORF (AHRD V1 *-*- Q6RUQ6_DAUCA); contains Interpro domain(s) IPR012511 S-adenosyl-l-methionine decarboxylase leader peptide	0	0	0	0	0	0	0	0	0	0	0	0	0	0	0	0	0	0	0	0	0	0	0	0	0	0	0	0	ORTHOMCL12762	1	1	1	1	0
Solyc01g010050	S-adenosylmethionine decarboxylase proenzyme (AHRD V1 **** Q7XZQ9_VITVI); contains Interpro domain(s) IPR001985 S-adenosylmethionine decarboxylase	26.45	27.53	28.38	29.65	46.51	45.18	28.41	31.2	25.03	21.93	37.64	30.32	47.81	43.99	28.54	26.79	15.98	14.57	18.37	17.42	43.46	46.8	21.11	18.83	20	19.19	59.62	57.52	ORTHOMCL949	2	1	3	3	3
Solyc01g010060	Unknown Protein (AHRD V1)	1.7	1.49	1.41	0.73	1.52	1.68	2.77	2.04	3.54	2.9	2.06	1.43	1.39	0.7	7.12	11.28	6.33	5.74	39.03	37.2	1.7	1.94	0.85	1.5	0.7	0.79	0.34	0	NA
Solyc01g010070	Unknown Protein (AHRD V1)	0	0	0	0	0	0	0	0	0	0	0	0	0	0	0	0	0	0	0	0	0	0	0	0	0	0	0	0	ORTHOMCL293	21	1	0	0	0
Solyc01g010080	Potassium/sodium hyperpolarization-activated cyclic nucleotide-gated channel 4 (AHRD V1 **** HCN4_MOUSE); contains Interpro domain(s) IPR000595 Cyclic nucleotide-binding	0.12	0.12	0.09	0.05	0	0.18	57.3	55.19	0	0	0	0	0	0	0.06	0	0	0	0.04	0.04	0.06	0.06	0.21	0.88	0.73	0.26	0.16	0	ORTHOMCL7645	2	1	1	1	0
Solyc01g010090	Unknown Protein (AHRD V1)	0	0	0	0	0	0	0	0	0	0	0	0	0	0.12	0	0	0	0	0	0	0	0	0	0	0	0	0	0	ORTHOMCL13952	3	0	0	0	0
Solyc01g010100	Ulp1 protease family C-terminal catalytic domain containing protein (AHRD V1 ***- Q60D46_SOLDE); contains Interpro domain(s) IPR003653 Peptidase C48, SUMO/Sentrin/Ubl1	0	0	0	0	0	0	0	0	0	0	0	0	0	0	0	0	0	0	0	0	0	0	0	0	0	0	0	0	ORTHOMCL134	36	1	0	0	0
Solyc01g010110	Mutator-like transposase (AHRD V1 *-*- Q9SI31_ARATH); contains Interpro domain(s) IPR004332 Transposase, MuDR, plant	0	0	0	0	0	0	0	0	0	0	0	0	0	0	0.18	0.15	0	0	0.21	0	0	0	0	0	0	0	0	0	NA
Solyc01g010120	Unknown Protein (AHRD V1)	0	0	0	0	0	0	0	0	0	0	0	0	0	0	0	0	0	0	0	0	0	0	0	0	0	0	0	0	ORTHOMCL20899	2	0	0	0	0
Solyc01g010130	Transcription factor (AHRD V1 *-** D6MKM4_9ASPA); contains Interpro domain(s) IPR011598 Helix-loop-helix DNA-binding	19.02	20.23	70.24	66.18	8.41	6.81	8.54	9.16	7.7	6.47	8.18	7.18	8.73	8.39	3.75	3.53	1.32	1.45	1.05	1.69	5.32	5.71	4	4	2.89	3.27	3.02	3.69	NA
Solyc01g010140	Unknown Protein (AHRD V1)	0	0	0	0	0.07	0	0	0	0	0	0	0	0	0	0	0	0	0	0	0	0	0	0	0	0	0	0	0	NA
Solyc01g010150	Unknown protein DS12 from 2D-PAGE of leaf, chloroplastic (AHRD V1 *--- UP12_ORYSJ); contains Interpro domain(s) IPR002912 Amino acid-binding ACT	21.76	23.51	12.92	15.38	3.83	4.06	10.13	11.13	0.45	0.33	0.4	0.41	0.81	0.6	2.82	2.5	2.7	3	5.55	6.07	0.66	0.9	1.56	1.63	0.43	0.24	1.37	1.22	ORTHOMCL5604	2	1	1	1	1
Solyc01g010160	Beta-glucosidase (AHRD V1 ***- D3YJ59_VITVI); contains Interpro domain(s) IPR001360 Glycoside hydrolase, family 1	0.38	0.59	0	0	0	0	0	0	0.27	0	0	0	0	0	0.29	0	2.08	2.58	33.87	31.84	0.59	0.61	1.01	2.36	75.38	79.03	0	0	NA
Solyc01g010170	Unknown Protein (AHRD V1)	0	0	0	0	0	0	0	0	0	0	0	0	0	0	0	0	2.89	2	34.79	64.92	0	0	4.68	2.99	105.46	78.76	0	0	NA
Solyc01g010180	Unknown Protein (AHRD V1)	18.72	17.66	22.81	18.82	63.58	61.3	5.64	4.08	73.58	69.58	64.78	49.36	48.54	42.57	29.34	32.05	2.99	3.28	3.6	2.25	5.04	3.36	2.84	1.18	1.49	1.8	20.69	16.33	NA
Solyc01g010190	Unknown Protein (AHRD V1)	27.68	23.28	18.25	23.01	9.9	9.76	18.73	18.26	43.64	39.8	34.91	26.16	36.76	37.84	21.6	19.25	18.95	13.36	21.39	22.75	18.76	16.16	10.42	9.67	11.66	11.37	1.55	0.94	ORTHOMCL11254	4	0	0	0	0
Solyc01g010200	LTRGag-pol-polymerase 3 (AHRD V1 ***- B2BXJ4_ARALY)	111.92	109.86	94.89	89.32	23.1	18.9	50.6	45.73	269.54	265.05	261.6	225.52	259.77	248.8	205.41	196.66	92.05	92.11	51.66	52.8	161.96	128.34	52.83	55.02	31.19	23.94	2.55	6.19	ORTHOMCL11254	4	0	0	0	0
Solyc01g010210	Unknown Protein (AHRD V1)	0	0	0	0.18	0	0	0	0	0	0	0	0	0	0	0	0.19	0	0	0.27	0.57	0	0	0	0	0	0	0	0	ORTHOMCL21023	2	0	0	0	0
Solyc01g010220	Unknown Protein (AHRD V1)	10.35	11.43	8.34	8.71	4.65	6.39	9.35	8.72	20.17	18.14	14.92	11.94	9.4	10.76	8.68	7.82	4.11	4.49	4.1	5.21	3.66	3.44	2.34	2.18	1.77	1.87	0.71	3.56	ORTHOMCL11254	4	0	0	0	0
Solyc01g010230	Unknown Protein (AHRD V1)	35.4	31.61	32.78	26.5	12.11	12.48	86.84	73.3	62.09	61.86	80.43	67.77	56.86	48.74	61.08	58.27	22.49	21.27	65.03	63.18	49.4	56.31	54.84	68.06	26.39	27.17	9.16	7.65	NA
Solyc01g010240	CRABS CLAW (Fragment) (AHRD V1 ***- Q5EMM8_GOSHI); contains Interpro domain(s) IPR006780 YABBY protein	1.52	1.24	0	0	0	0	0	0	0	0	0	0	0	0	0	0	0	0	0	0	0	0	0	0	0	0	0	0	NA
Solyc01g010250	6-phosphogluconolactonase (AHRD V1 ***- B6U0H2_MAIZE); contains Interpro domain(s) IPR005900 6-phosphogluconolactonase	8.76	10.1	7.42	8.08	7.4	9	0	0	15.22	13.45	8.92	9.63	5.87	6.17	12.58	13.49	22.95	23.77	14.26	13.86	14.53	14.69	17.31	17.04	16.67	15.86	18.32	14.52	ORTHOMCL5980	2	1	1	1	1
Solyc01g010260	Cytochrome P450	0	0	0	0	0	0	0.11	0	0	0	0	0	0	0	0	0	0	0	0	0	0	0	0	0	0	0	0	0	ORTHOMCL3095	1	0	1	4	1
Solyc01g010270	Nitrilase associated protein-like (Fragment) (AHRD V1 *--- Q1HEA6_MUSAC)	87.96	92.4	61.67	55.95	69.38	72.44	134.71	132.54	187.86	192.44	174.58	153.79	150.2	147.7	223.4	219.6	69.75	68.79	56.22	57.11	114.76	82.97	36.94	40.71	28.08	25.76	23.78	19.39	NA
Solyc01g010280	Unknown Protein (AHRD V1)	1.81	1.44	2.26	2.57	0.15	0	0.08	0.08	0	0	0	0	0	0	0	0	0	0	0	0	0	0	0	0	0	0	0	0	NA
Solyc01g010290	Ureide permease 2 (AHRD V1 ***- B6U6B9_MAIZE); contains Interpro domain(s) IPR009834 Fatty acid elongase 3-ketoacyl-CoA synthase 1	10.21	10.52	10.07	9.73	17.6	17.24	52.96	50.31	9.66	6.48	10.19	8.15	8.24	7.23	10.2	8.69	6.42	6.25	4.32	4.17	8.42	6.46	5.19	5.72	3.61	3.72	5.01	3.52	ORTHOMCL5520	1	1	2	1	1
Solyc01g010300	MADS-box protein-like (AHRD V1 ***- Q94CT0_ORYSJ); contains Interpro domain(s) IPR002100 Transcription factor, MADS-box	0	0	0	0	0	0	0	0	0	0	0	0	0	0	0	0	0	0	0	0	0	0	0	0	0	0	0	0	NA
Solyc01g010310	Glucan endo-1 3-beta-glucosidase 3 (AHRD V1 *-*- B6UAN6_MAIZE); contains Interpro domain(s) IPR012946 X8	36.67	34.47	10.01	9.03	5.54	7.49	44.78	37.46	34.32	33.45	50.57	47.02	39.38	36.31	23.58	21.35	12.92	13.14	0.38	0.2	12.05	11.2	11.37	16.31	8.32	5.82	4.89	5.55	ORTHOMCL20898	1	1	0	0	0
Solyc01g010320	Mutator-like transposase (AHRD V1 *-*- Q8W3H2_ORYSA); contains Interpro domain(s) IPR018289 MULE transposase, conserved domain	0	0.15	0	0	0	0	0	0	0	0	0	0	0	0	0	0	0	0	0	0	0	0	0	0	0	0	0	0	NA
Solyc01g010330	Unknown Protein (AHRD V1)	0	0	0	0	0	0	0	0	0	0	0	0	0	0	0	0	0	0	0	0	0	0	0	0	0	0	0	0	NA
Solyc01g010340	Serine/threonine-protein phosphatase 7 long form homolog (AHRD V1 ***- PPP7L_ARATH); contains Interpro domain(s) IPR019557 Aminotransferase-like, plant mobile domain	0.36	0.06	0.41	0.5	0.2	0.27	0.57	0.14	0.25	0.5	0.1	0.26	0.14	0.48	0.09	0.08	0.13	0.27	0.21	0.44	0	0	0	0	0	0	0	0	ORTHOMCL354	4	16	0	0	0
Solyc01g010350	Glucose-6-phosphate/phosphate translocator (AHRD V1 **** Q7XY15_WHEAT); contains Interpro domain(s) IPR004696 Tpt phosphate/phosphoenolpyruvate translocator	3.81	2.76	0	0.07	0	0	12.82	13.54	0	0	0	0	0.07	0.14	0.19	0.08	0.2	0	0	0	0.19	0.2	0.11	0.21	0	0	0	0	ORTHOMCL14453	1	1	0	1	0
Solyc01g010360	14-3-3-like protein GF14 epsilon (AHRD V1 **-- 14310_ARATH); contains Interpro domain(s) IPR000308 14-3-3 protein	55.87	61.3	5.31	4.44	0	0	0	0	0	0.12	0	0.13	0.79	0.5	0.8	0.77	0.09	0.1	0.08	0.08	1.47	0.55	2.27	1.93	0.1	0.34	0	0	ORTHOMCL20897	1	1	0	0	0
Solyc01g010370	Dehydration-responsive protein-like (AHRD V1 **-- Q653G1_ORYSJ); contains Interpro domain(s) IPR004159 Protein of unknown function DUF248, methyltransferase putative	8.05	6.47	1.95	2.29	3.9	3.7	4.41	5.34	3.46	4.67	2.91	2.36	2.2	2.25	1.75	2.19	0.97	0.97	0.28	0.51	1.76	1.62	1.03	1.05	0.76	0.46	2.4	1.19	ORTHOMCL856	4	4	3	2	0
Solyc01g010380	Unknown Protein (AHRD V1)	0	1.16	0	1.36	0	0	0	0	0	0	0	0	0	0	0	0	0	0	0	0	0	0	0	0	0	0	0	0.55	NA
Solyc01g010390	Beta-glucosidase (AHRD V1 ***- D3YJ59_VITVI); contains Interpro domain(s) IPR001360 Glycoside hydrolase, family 1	66.1	61.79	4.16	4.16	8.34	6.93	19.91	16.92	9.43	8.92	8.79	8.03	10.76	8.32	4.58	3.53	0.77	1.19	1.12	1.35	10.57	9.58	2.56	5.14	1.45	1.51	13.43	10.67	ORTHOMCL1232	2	2	2	3	2
Solyc01g010400	Ripening-related protein 3 (AHRD V1 **-- RIP3_ORYSJ)	0	0	0	0	0	0	0	0	0	0	0	0	0	0	0	0	0	0	0	0	0	0	0	0	0	0	0	0	NA
Solyc01g010410	Cys2/His2 zinc-finger transcription factor (AHRD V1 *-** Q4U316_SILLA); contains Interpro domain(s) IPR007087 Zinc finger, C2H2-type	0.51	0.48	0.29	0.22	0	0	0	0	0.25	0.36	0.49	0.64	0.91	0.58	2	1.84	2.75	3.33	0.51	0.8	3.54	3.41	2.98	3.04	1.58	1.08	0.1	0	ORTHOMCL20896	1	1	0	0	0
Solyc01g010420	NPH3 domain containing protein-like (AHRD V1 *-*- Q8GVF8_ORYSJ); contains Interpro domain(s) IPR007679 Protein of unknown function DUF569	0.35	0.24	0.13	0.28	0	0	0.97	0.97	0	0	0	0	0	0	0	0.15	0	0	0	0.11	0	0	0	0.13	0	0	0	0	ORTHOMCL20895	1	1	0	0	0
Solyc01g010430	cDNA clone J023121M11 full insert sequence (AHRD V1 **-- B7F743_ORYSJ); contains Interpro domain(s) IPR007679 Protein of unknown function DUF569	26.33	29.91	11.88	10.85	4.6	6.17	18.04	18.34	4.88	4.18	7.11	6.49	3.8	3.75	23.98	28.31	24.53	23.28	28.47	29.4	14.09	12.97	7.48	8.19	9.43	8.64	0.94	0.49	ORTHOMCL20894	1	1	0	0	0
Solyc01g010440	Unknown Protein (AHRD V1)	23.55	23.29	26.21	25.11	17.61	17.88	39.7	37.45	43.62	40.42	38.71	34.32	67.11	67.79	44.11	42.99	39.87	39.44	29.3	27.73	48.61	47.76	34.7	37.15	33.08	33.13	15.85	18.39	ORTHOMCL10530	1	1	1	1	1
Solyc01g010450	Ulp1 protease family C-terminal catalytic domain containing protein (AHRD V1 *-*- Q60D46_SOLDE)	0	0	0	0	0	0	0	0	0	0	0	0	0	0	0	0	0	0	0	0	0	0	0	0	0	0	0	0	ORTHOMCL1616	9	0	0	0	0
Solyc01g010460	Unknown Protein (AHRD V1)	1.32	2.33	1.46	1.72	4.83	4.71	1.51	1.65	3.49	3.12	2.84	2.83	4.95	3.32	3.05	3.36	1.37	1.28	1.81	2.83	2.8	3.06	4	3.9	2.21	2.27	16.9	18.78	ORTHOMCL20893	1	1	0	0	0
Solyc01g010470	Isoamylase N-terminal domain containing protein (AHRD V1 ***- Q6AVV5_ORYSJ)	3.87	5.44	4.61	4.51	10.96	12.05	3.71	3.94	5.49	5.43	4.91	4.56	6.65	6.92	9.08	6.02	3.78	3.91	4.9	5.27	5.86	7.41	6.95	6.6	4.56	5.16	15.91	12.89	ORTHOMCL20892	1	1	0	0	0
Solyc01g010480	Potassium voltage-gated channel subfamily H member 8 (AHRD V1 *--- KCNH8_HUMAN); contains Interpro domain(s) IPR013767 PAS fold	11.41	10.87	18.62	19.54	173.59	177.33	1.86	1.8	0.38	0.32	1.31	1.41	6.49	6.37	35.28	32.65	81.78	87.21	21.54	21.97	18.28	19.74	13.76	11.19	14.34	13.37	169.07	137.92	ORTHOMCL20891	1	1	0	0	0
Solyc01g010490	Cytochrome P450	0	0	0	0	0	0	0.17	0.11	0	0	0	0	0.16	0.05	3.71	4.24	18.82	16.88	25.56	23.48	7.85	6.74	13.41	12.41	26.32	22.05	0	0	ORTHOMCL20890	1	1	0	0	0
Solyc01g010500	Ein3-binding f-box protein 3 (AHRD V1 *-*- B9HA53_POPTR)	18.09	17.67	0.16	0.16	0.31	0.08	0	0	0	0	0	0	0	0	0.1	0.09	0	0	0	0	0	0.11	0	0	0	0	0	0	ORTHOMCL1320	6	2	2	0	0
Solyc01g010510	Pentatricopeptide repeat-containing protein (AHRD V1 ***- D7KPN1_ARALY); contains Interpro domain(s) IPR002885 Pentatricopeptide repeat	1	1.36	0.83	0.97	1.4	1.59	1.42	1.36	0.59	0.8	0.96	0.7	0.65	0.77	0.73	0.78	0.41	0.85	0.89	0.92	1.18	1.21	0.67	0.96	0.82	0.37	2.25	2.2	ORTHOMCL13282	1	1	1	1	0
Solyc01g010520	Uncharacterized plant-specific domain TIGR01589 family protein (AHRD V1 ***- Q60CZ4_SOLDE); contains Interpro domain(s) IPR006476 Conserved hypothetical protein CHP01589, plant	16.42	17.13	19.24	20.03	21.43	21.97	1.3	2.21	19.23	19.49	17.57	12.76	15.63	13.44	8.14	7.85	0.69	0.93	0.11	0.12	6.82	7.11	4.91	3.42	1.1	1.33	19.09	21.4	ORTHOMCL3464	2	1	2	1	1
Solyc01g010530	Solute carrier family 2, facilitated glucose transporter member 3 (AHRD V1 ***- GTR3_RAT); contains Interpro domain(s) IPR003663 Sugar/inositol transporter	0.93	1.19	0	0	0	0	0	0	0	0.08	0	0	0	0	0	0	0	0	0	0	0	0	0	0	0	0	0	0	ORTHOMCL488	4	4	2	7	0
Solyc01g010540	Ribosomal protein (AHRD V1 ***- B3TM27_ELAGV); contains Interpro domain(s) IPR002942 RNA-binding S4 IPR018079 Ribosomal protein S4, conserved site IPR001912 Ribosomal protein S4	219.96	211.96	181.13	177.35	102.32	94.07	219.42	202.25	423.13	416.47	295.91	252.69	366.06	350.09	261.23	259.46	219.8	224.05	168.54	172.19	146.99	140.64	124.11	122.6	103.96	102.2	195.78	228.92	ORTHOMCL911	4	2	1	3	2
Solyc01g010550	Unknown Protein (AHRD V1)	0	0	0	0	0	0	0	0	0	0	0	0	0	0	0	0	0	0	0	0	0	0	0	0	0	0	0	0	ORTHOMCL11248	3	1	0	0	0
Solyc01g010570	Mucin-like protein (Fragment) (AHRD V1 ***- B0FSK5_9MAGN)	12.48	11.71	13.68	13.54	8.28	8.96	10.56	10.7	15.68	17.17	21.13	16.11	33.75	34.18	28.19	31.9	26.24	24.71	15.99	14.58	19.69	23.02	18.59	20.28	16.68	18.03	15.33	10.59	ORTHOMCL9782	1	1	1	1	1
Solyc01g010580	Ribosomal protein (AHRD V1 ***- B3TM27_ELAGV); contains Interpro domain(s) IPR002942 RNA-binding S4 IPR018079 Ribosomal protein S4, conserved site IPR001912 Ribosomal protein S4	216.43	205.31	201.23	197.72	103.35	101.55	278.04	259.12	475.94	467.1	384.09	345.79	558.56	538.61	352.28	348.99	290.21	300	184.67	190.3	168.24	158.05	138.97	139.32	111.21	110.29	183.43	220.58	ORTHOMCL911	4	2	1	3	2
Solyc01g010590	Peptidyl-prolyl cis-trans isomerase A (AHRD V1 ***- B6TSE8_MAIZE); contains Interpro domain(s) IPR002130 Peptidyl-prolyl cis-trans isomerase, cyclophilin-type	20.82	20.28	14.37	16.58	12.22	12.26	35.35	35	29.77	33.21	22.47	18.47	22.65	21.92	22.36	21.3	15.57	13.61	17.11	17.1	21.39	21.59	17.01	15.89	13.56	11.99	7.87	6.13	ORTHOMCL10534	1	1	1	1	1
Solyc01g010600	Homeobox-leucine zipper-like protein (AHRD V1 *-*- Q3HRT1_PICGL); contains Interpro domain(s) IPR001356 Homeobox	5	5.21	4.5	3.84	0	0.11	0.11	0.23	0	0	0	0	0	0	0	0	0	0	0	0	0	0	0	0	0	0	1.18	0	ORTHOMCL20889	1	1	0	0	0
Solyc01g010610	Unknown Protein (AHRD V1); contains Interpro domain(s) IPR003656 Zinc finger, BED-type predicted	0	0	0	0	0	0	0	0	0	0	0	0	0	0	0	0	0	0	0	0	0	0	0	0	0	0	0	0	ORTHOMCL4105	6	0	0	0	0
Solyc01g010630	Ulp1 protease family C-terminal catalytic domain containing protein (AHRD V1 *-*- Q60D46_SOLDE)	0	0.07	0	0	0	0	0	0	0	0	0	0	0	0	0	0	0	0	0.06	0.06	0	0	0	0	0	0.09	0	0	ORTHOMCL4	93	2	0	0	0
Solyc01g010640	Uncharacterized membrane protein (AHRD V1 **-- Q46JN3_PROMT); contains Interpro domain(s) IPR001395 Aldo/keto reductase	14.69	13.56	31.14	30.33	56.34	51.6	4.19	4.83	9.19	7.55	16.53	14.26	17.57	15.4	18.63	18.45	34.02	30.7	74.15	69.95	23.51	24.74	38	31	56.63	66.27	89.32	88.92	ORTHOMCL13373	1	0	1	1	1
Solyc01g010650	UDP-galactose transporter 3 (AHRD V1 **** D7KBJ4_ARALY); contains Interpro domain(s) IPR013657 UAA transporter	45.14	45.38	31.09	27.33	8.36	7.89	18.92	19.54	22.43	20.46	21.41	18.03	41.39	38.53	35.64	33.23	34.28	36.44	20.52	18.39	31.75	26.41	22.28	25.58	12.98	12.34	5.43	6.17	ORTHOMCL3941	2	1	2	1	1
Solyc01g010660	Receptor-like protein kinase At3g21340 (AHRD V1 **** RLK6_ARATH); contains Interpro domain(s) IPR002290 Serine/threonine protein kinase	8.08	9.22	10.05	10.34	4.74	3.65	7.19	6.63	12.04	14.75	10.38	7.4	8.58	8.58	15.25	15.24	9.58	8.88	25.99	27.78	8.16	8.09	10.34	9.32	14.55	13.62	6.8	6.73	ORTHOMCL2762	2	2	2	1	1
Solyc01g010670	Unknown Protein (AHRD V1)	0	0.28	0	0	0	0	0	0	0	0	0	0	0	0.64	0	0	0	0	0	0	0	0	0.48	0	0	0	0	0	NA
Solyc01g010680	Genomic DNA chromosome 5 P1 clone MRD20 (AHRD V1 *--- Q9FH72_ARATH); contains Interpro domain(s) IPR004332 Transposase, MuDR, plant	0	0	0	0	0	0	0	0	0	0	0	0	0	0.11	0	0	0	0	0	0	0	0	0.16	0	0	0	0	0	ORTHOMCL122	38	1	0	0	0
Solyc01g010690	Polyvinylalcohol dehydrogenase (AHRD V1 ***- D4SWQ1_9XANT); contains Interpro domain(s) IPR011047 Quinonprotein alcohol dehydrogenase-like	0	0	0	0	0	0	0	0	0	0	0	0	0	0	0	0	0	0	0	0	0	0	0	0	0	0	0	0	ORTHOMCL11414	1	1	0	2	0
Solyc01g010700	AKIN gamma (AHRD V1 **-- B4FX20_MAIZE); contains Interpro domain(s) IPR000644 Cystathionine beta-synthase, core	11.7	11.67	12	11.93	7.03	8.02	1.9	2.2	15.95	14.91	21.24	19.82	26.74	24.96	15.13	13.68	13.02	13.99	19.67	18.88	21.57	19.64	26.43	25.66	23.13	23.91	19.44	17.04	ORTHOMCL10020	1	1	1	1	1
Solyc01g010710	Serine carboxypeptidase 1 (AHRD V1 **** B6U0V5_MAIZE); contains Interpro domain(s) IPR001563 Peptidase S10, serine carboxypeptidase	1.67	1.96	0.28	0.69	3.9	3.26	31.62	29.75	1.39	0.94	0.81	1.27	0.88	1.05	2.36	2.25	0.16	0.05	0	0	3.57	3.89	0.67	0.86	0	0.06	0.67	1.46	ORTHOMCL6343	1	2	0	2	0
Solyc01g010720	Serine carboxypeptidase K10B2.2 (AHRD V1 **** B6TKD2_MAIZE); contains Interpro domain(s) IPR001563 Peptidase S10, serine carboxypeptidase	0	0	0	0	0	0	10.19	10.25	0	0	0	0	0	0	0	0	0	0	0	0	0	0	0	0	0	0	0	0	ORTHOMCL20888	1	1	0	0	0
Solyc01g010730	Serine carboxypeptidase (AHRD V1 ***- B6SWY3_MAIZE); contains Interpro domain(s) IPR001563 Peptidase S10, serine carboxypeptidase	0	0	0	0	0	0	2.57	2.93	0	0	0	0	0	0	0	0	0	0	0	0	0	0	0	0	0	0	0	0	NA
Solyc01g010740	Pectate lyase family protein (AHRD V1 **** D7M6R5_ARALY); contains Interpro domain(s) IPR002022 Pectate lyase/Amb allergen	12.14	12.67	3.98	2.64	0	0	0	0	0.07	0	0	0	0.06	0.06	0	0	0	0	0	0	0	0	0	0	0	0	0	0	ORTHOMCL20887	1	1	0	0	0
Solyc01g010750	Stress responsive protein (AHRD V1 *--- B6STP1_MAIZE); contains Interpro domain(s) IPR008997 Ricin B-related lectin	152.14	138.46	245.93	247.33	84.23	78.09	302.69	309.45	225.47	220.94	330.61	292.67	436.75	412.29	321.25	317.48	368.26	373.59	339.96	348.8	229.05	233.22	265.18	275.06	263.4	274.41	55.61	40.97	ORTHOMCL1854	1	1	1	1	5
Solyc01g010760	Porin/voltage-dependent anion-selective channel protein (AHRD V1 **** A9P802_POPTR); contains Interpro domain(s) IPR001925 Porin, eukaryotic type	125.92	116.45	95.99	91.51	31.66	30.43	89.83	86.76	65.68	60.63	38.73	39.67	41.52	42.01	32.61	32.99	74.91	79.66	100.68	100.72	46.36	49.38	91.1	90.1	146.27	141.53	40.57	46.71	ORTHOMCL14468	1	1	0	1	0
Solyc01g010770	Spfh domain / band 7 family protein (AHRD V1 **-- B4AS86_FRANO); contains Interpro domain(s) IPR001107 Band 7 protein	0.68	0.61	2.08	2.85	10.5	9.13	3.47	4.18	0.94	0.48	2.73	1.63	8.97	5.4	4.71	5.62	3.23	2.87	0.23	0.24	1.19	3.12	1.19	2.09	0.39	0.11	0.24	0.25	ORTHOMCL20886	1	1	0	0	0
Solyc01g010780	ATP binding / serine-threonine kinase (AHRD V1 **** C5DB71_VITVI); contains Interpro domain(s) IPR002290 Serine/threonine protein kinase	20.89	23.16	26.2	24.32	20.19	19.73	29.45	29.22	26.18	26.18	24.77	20.74	25.85	24.7	21.19	20.82	19.83	21.57	21.09	20.68	26.63	29.17	28.52	24.83	23.82	26.14	11.6	9.82	ORTHOMCL1134	2	2	3	2	2
Solyc01g010790	F-box protein At2g21930 (AHRD V1 ***- D7LCM1_ARALY); contains Interpro domain(s) IPR013187 F-box associated type 3	0	0.25	0	0	0	0	0	0	0	0	0	0	0	0	0	0	0.09	0	0	0	0	0	0	0	0	0	0	0	NA
Solyc01g010800	Unknown Protein (AHRD V1)	2.67	0.91	2.07	1.06	0	1.03	2.13	0	0	0	3.01	1.31	3.06	3.08	5.48	3.39	6.75	1	0.79	0.82	0	0	0	0	0	0	0	0	NA
Solyc01g010810	RAN guanine nucleotide release factor (AHRD V1 **-* B6TPU9_MAIZE); contains Interpro domain(s) IPR016123 Mog1/PsbP, alpha/beta/alpha sandwich	7.1	8.04	7.96	9.1	9.48	9.17	9.64	9.93	11.83	12.59	11.59	10.47	9.99	9.95	14.71	14.51	10.45	10.07	13.45	15.31	10.11	12.55	10.96	11.36	11.39	10.68	10.96	3.92	ORTHOMCL10022	1	1	1	1	1
Solyc01g010820	Cullin C (AHRD V1 ***- D3BHJ6_POLPA); contains Interpro domain(s) IPR001373 Cullin, N-terminal	7.6	6.42	12.34	12.17	5.87	6.02	14.09	15.5	8.74	7.1	15.41	14.49	12.46	10.94	14.17	11.53	14.17	15.38	12.26	11.26	22.09	22.1	20.58	24.54	14.82	13.99	12.7	11.37	ORTHOMCL1230	2	2	2	2	3
Solyc01g010830	HAD-superfamily hydrolase (AHRD V1 ***- D5A3P4_SPIPL); contains Interpro domain(s) IPR011949 HAD-superfamily hydrolase, subfamily IA, REG-2-like	13.24	13	10.58	9.9	10.83	10.24	9.3	9.56	14.9	14.58	14.39	14.53	12.51	13.63	17.84	16.16	20.97	21.05	18.46	20.36	20.09	23.05	36.12	31.42	73.53	74.55	16.78	14.71	ORTHOMCL10744	1	1	1	1	1
Solyc01g010840	Unknown Protein (AHRD V1)	0	0	0	0	0	0	0	0	0	0	0	0	0	0	0	0	0	0	0	0	0	0	0	0	0	0	0	0	NA
Solyc01g010850	Unknown Protein (AHRD V1)	0	0	0	0	0	0	0	0	0	0	0	0	0	0	0	0	0	0	0	0	0	0	0	0	0	0	0	0	NA
Solyc01g010860	Sphingosine hydroxylase (AHRD V1 *--* A8N9Q2_COPC7); contains Interpro domain(s) IPR006694 Fatty acid hydroxylase	9.19	10.62	20.51	19.07	10.35	9.56	14.36	13.87	7.15	5.5	10.27	8.28	13.34	11.91	8.74	9.73	9.42	10.13	11.25	11.95	17.36	15.94	12.53	14.04	18.09	15.96	3.4	2.88	ORTHOMCL2034	2	2	2	1	2
Solyc01g010870	Dehydration-responsive family protein (AHRD V1 ***- D7KPN7_ARALY); contains Interpro domain(s) IPR004159 Protein of unknown function DUF248, methyltransferase putative	12.73	11.86	15.73	13.91	11.88	12.22	25.7	25	16.73	15.65	23.09	18.57	25.71	24.43	37.84	36.57	78.61	78.5	90.69	92.8	47.49	53.51	109.49	103.53	76.12	66.99	12.53	14.33	ORTHOMCL104	10	10	7	7	8
Solyc01g010880	E3 ubiquitin-protein ligase MARCH3 (AHRD V1 *--- B5X3M1_SALSA); contains Interpro domain(s) IPR011016 Zinc finger, RING-CH-type	36.4	34.95	78.96	76.2	7.25	7.94	11.38	10.71	6.86	7.12	8.07	5.16	7.27	8.78	5.3	6.83	4.85	4.55	5.74	6.25	4.69	6.07	4.97	4.87	3.96	5.11	4.97	2.89	ORTHOMCL4135	2	2	0	0	2
Solyc01g010890	Expansin 2 (AHRD V1 ***- B1A2I4_9ROSI); contains Interpro domain(s) IPR002963 Expansin	3.58	3.67	3.15	3.53	0	0	0.19	0	0.11	0	0	0	0	0	0	0	0	0	0	0	0	0	0	0	0	0	0	0	ORTHOMCL9778	1	1	1	2	0
Solyc01g010900	Cytochrome P450	22.81	22.16	0	0	0	0	0.06	0	0	0	0	0	0.06	0	0	0	0	0	0	0	0	0	0	0	0	0	0	0	ORTHOMCL13086	1	1	1	1	0
Solyc01g010910	MYB transcription factor (AHRD V1 *-*- Q6R098_ARATH); contains Interpro domain(s) IPR015495 Myb transcription factor	1.44	1.48	0.2	0.61	1.44	0.59	0.2	0	0	0.12	0	0	0.1	0	0	0	0	0	0	0	0	0	0	0	0	0	0.36	0.74	ORTHOMCL20885	1	1	0	0	0
Solyc01g010920	Os03g0169000 protein (Fragment) (AHRD V1 ***- Q0DUS7_ORYSJ); contains Interpro domain(s) IPR004348 Protein of unknown function DUF246, plant	2.66	3.57	1.16	1.19	1.32	1.54	3.59	4.39	1.61	1.17	1.69	0.25	0.76	1.73	1.03	2.12	1.08	1.31	0.3	0.62	1.03	1.59	1.75	1.3	0.38	1.52	1.39	0.48	ORTHOMCL20884	1	1	0	0	0
Solyc01g010930	Os03g0169000 protein (Fragment) (AHRD V1 ***- Q0DUS7_ORYSJ); contains Interpro domain(s) IPR004348 Protein of unknown function DUF246, plant	1.99	2.34	0.46	0.59	1.46	1.49	2.98	3.21	0.96	1.95	1.34	1.02	1.25	1.26	2.14	1.26	0.54	0.56	0.53	0.28	2.31	1.58	1.39	2	0.57	1.03	1.8	1.01	ORTHOMCL20883	1	1	0	0	0
Solyc01g010940	Transmembrane emp24 domain-containing protein 10 (AHRD V1 ***- B6U439_MAIZE); contains Interpro domain(s) IPR000348 emp24/gp25L/p24	37.06	36.97	35.44	35.06	26.99	26.8	40.23	37.95	27.38	23.37	23.87	19.3	11.04	9.94	19.51	19.54	20.7	20.31	41.67	38.31	21.25	22.78	26.34	22.6	21.39	19.14	27.08	23.25	ORTHOMCL20882	1	1	0	0	0
Solyc01g010950	Kinase family protein (AHRD V1 **** D7KBF8_ARALY); contains Interpro domain(s) IPR016253 Integrin-linked protein kinase	32.87	33.62	37.33	39.13	12.11	11.52	3.73	2.81	12.54	11.87	10.7	8.6	11.13	13.71	11.75	13.24	13.96	12.31	15.8	15.36	12.79	14.97	14.91	12.64	20.15	19.74	7.53	7.5	ORTHOMCL5976	2	2	1	1	0
Solyc01g010960	60S ribosomal protein L35 (AHRD V1 ***- B3TLM6_ELAGV); contains Interpro domain(s) IPR001854 Ribosomal protein L29	18.78	16.39	12.21	20.16	6.89	9.25	19.23	18.21	50.53	50.84	23.38	15.89	23.13	26.14	16.17	24.58	13.49	12.73	9.83	13.28	6.44	9.7	9.68	7.73	6.68	6.84	0	0	NA
Solyc01g010970	ARGONAUTE 1 (AHRD V1 ***- D6RUV9_TOBAC); contains Interpro domain(s) IPR003165 Stem cell self-renewal protein Piwi	0.97	1.02	1.91	1.93	0.27	0.34	1.71	1.97	0.07	0.11	0.09	0.16	0	0.03	0.5	0.31	0.55	0.63	0.57	0.7	0.5	0.09	0.24	0.51	0.5	0.42	0.34	0	ORTHOMCL5598	1	1	1	2	1
Solyc01g010980	Unknown Protein (AHRD V1)	17.88	23.28	31.19	35.99	23.96	17.83	2.93	0.97	18.03	20.56	31.66	29.97	37.3	36.59	20.04	18.6	6.17	6.4	0	0.75	0	0	0	0	0	0	0	0	NA
Solyc01g010990	Unknown Protein (AHRD V1)	3.74	3.94	2.33	2.27	3.16	3.09	7.49	6.35	5.49	3.92	8.21	5.43	6.08	4.95	8.93	7.37	6.96	7.58	6.59	7.88	9.53	12.28	5.57	5.43	1.67	1.38	3.42	3.31	ORTHOMCL10540	1	1	2	1	0
Solyc01g011000	Eukaryotic translation initiation factor 5A (AHRD V1 **** D6N3G5_GOSHI); contains Interpro domain(s) IPR001884 Translation elongation factor, IF5A	242.02	245.47	338.38	316.05	197.75	190.81	306.23	306.04	297.35	284.07	245.08	199.77	203.56	198.76	254.02	251.82	289.14	278.84	254.55	258.04	170.29	174.56	240.14	255.75	277.3	248.14	203.47	223.65	ORTHOMCL1029	3	2	1	3	3
Solyc01g011010	Unknown Protein (AHRD V1)	4.41	5.74	6.06	5.27	5.45	3.93	6.25	10.33	3.61	2.25	1.36	3.84	2.07	3.93	4.63	8.41	3.48	5.4	7.66	8.15	8.09	9.92	6.32	6.51	6.69	10.44	3.63	5.81	NA
Solyc01g011020	Unknown Protein (AHRD V1)	0	0	0	0.64	0	0	0	0.64	0	0	0	0	0	0	0	0	0	0	0	0.5	0	0	0	0	0	0	0	0	NA
Solyc01g011030	RING zinc finger protein-like (AHRD V1 **-- B6SSZ2_MAIZE); contains Interpro domain(s) IPR001841 Zinc finger, RING-type	23.79	23.06	22.93	22.94	7.74	5.89	9.1	9.83	17.77	15.69	18.79	16.37	32.11	29.76	27.93	25.95	26.18	25.8	16.74	17.14	27.53	28.51	23.93	25.87	16.12	14.19	6.64	10.79	ORTHOMCL15569	1	1	1	0	0
Solyc01g011040	LRR receptor-like serine/threonine-protein kinase, RLP	61.58	60	32.46	34.66	29.77	26.63	44.5	44.38	80.37	82.48	69.13	56.14	33.29	31.27	51.51	50.79	35.44	33.73	38.42	33.81	46.71	45.54	32.6	36.4	29.16	23.79	16.55	23.19	ORTHOMCL6563	1	1	1	1	1
Solyc01g011050	LRR receptor-like serine/threonine-protein kinase, RLP	459.76	433.35	694.47	664.31	0.41	0.21	1.29	1	0.41	0.59	0.41	0.62	2.33	2.35	0.92	0.91	0.52	0.27	0	0	0	0.1	0	0.07	0	0.62	0	0	ORTHOMCL20881	1	1	0	0	0
Solyc01g011060	Maturase (Fragment) (AHRD V1 ***- O79414_SOLTU); contains Interpro domain(s) IPR000442 Intron maturase, type II	0	0	0	0	0	0	0.38	0	0	0	0	0	0	0	0	0	0	0	0	0	0	0	0.56	0	0	0	0	0	ORTHOMCL20880	2	0	0	0	0
Solyc01g011070	Unknown Protein (AHRD V1)	0	0	0	0	0	0	0	0	0	0	0	0	0	0	0	0	0	0	0	0	0	0	0	0	0	0	0	0	NA
Solyc01g011080	Unknown Protein (AHRD V1)	0	0	0	0	0	0	0	0.19	0	0.22	0	0.23	0	0.18	0	0	0	0	0	0	0	0	0	0	0	0	0	0	NA
Solyc01g011090	Phospholipid-transporting ATPase (AHRD V1 ***- C5G6U4_AJEDR); contains Interpro domain(s) IPR001757 ATPase, P-type, K/Mg/Cd/Cu/Zn/Na/Ca/Na/H-transporter	1.14	1.01	1.25	0.88	2.25	2.44	2.64	3.5	1.9	1.83	3.19	1.92	3.17	2.62	3.61	3.92	3.46	2.53	3.13	3.43	3.31	3.51	2.9	2.64	2.96	2.71	1.2	0.97	ORTHOMCL20879	1	1	0	0	0
Solyc01g011100	Phospholipid-transporting ATPase (AHRD V1 **** B6JZB6_SCHJY); contains Interpro domain(s) IPR006539 ATPase, P-type, phospholipid-translocating, flippase	12.59	11.43	14.01	13.56	22.05	21.71	27.82	26.52	19.48	19.02	18.01	16.71	18.01	17.56	26.4	25.55	24.03	23.97	23.54	22.73	23.79	26.95	20.36	21.79	21.36	24.2	16.63	15.38	ORTHOMCL65	12	11	11	10	6
Solyc01g011110	Unknown Protein (AHRD V1)	0	0	0	0	0	0	0	0	0	0	0	0	0	0	0	0	0	0	0	0	0	0	0	0	0	0	0	0	ORTHOMCL20878	1	1	0	0	0
Solyc01g011130	Ulp1 protease family C-terminal catalytic domain containing protein (AHRD V1 *-*- Q60D46_SOLDE); contains Interpro domain(s) IPR003653 Peptidase C48, SUMO/Sentrin/Ubl1	0	0	0	0	0	0	0	0	0	0	0	0	0.05	0	0	0	0	0	0	0	0.15	0	0	0	0	0.06	0	0	ORTHOMCL4	93	2	0	0	0
Solyc01g011150	Unknown Protein (AHRD V1); contains Interpro domain(s) IPR006564 Zinc finger, PMZ-type	0	0	0	0	0	0	0	0	0	0	0	0	0	0	0	0	0	0	0	0	0	0	0	0	0	0	0	0	ORTHOMCL168	2	29	0	0	0
Solyc01g011170	Unknown Protein (AHRD V1)	0	0	0	0	0	0	0	0	0	0	0	0	0	0	0	0	0	0	0	0	0	0	0	0	0	0	0	0	ORTHOMCL13942	3	0	0	0	0
Solyc01g011180	Unknown Protein (AHRD V1)	3.11	6.37	4.14	3.19	1.51	3.59	5.34	4.26	4.31	5.62	5.27	3.28	12.24	13.85	12.33	11.3	5.79	9.49	6.72	5.34	11.74	12.07	14.03	3.49	8.19	7.53	9.3	3.22	ORTHOMCL20877	2	0	0	0	0
Solyc01g011190	Unknown Protein (AHRD V1)	0	1.36	1.55	0.53	0	0.51	1.07	1.07	1.23	0	0.75	0	1.53	1.54	2.05	1.13	1.45	1	1.58	1.64	6.22	2.84	2.34	1.99	2.05	6.37	0	0	ORTHOMCL20877	2	0	0	0	0
Solyc01g011200	Aspartyl protease family protein (AHRD V1 ***- D7LJ61_ARALY); contains Interpro domain(s) IPR001461 Peptidase A1	0.35	0.83	0.4	0.28	0.66	0.94	0.42	0.14	0.64	0.81	1.57	0.86	0.93	1.07	0.71	0.59	0.63	0.52	1.24	1.29	0.36	0.19	0.2	0.52	0.27	0.15	0	1.01	ORTHOMCL11247	4	0	0	0	0
Solyc01g011220	Aspartyl protease family protein (AHRD V1 ***- D7LJ61_ARALY); contains Interpro domain(s) IPR001461 Peptidase A1	0.39	0.79	0.6	0.62	0.44	0.74	0.31	0.77	0.36	0.36	0.44	0.57	1.62	1.04	0.2	0.82	0.42	0.72	1.72	0.48	0.6	0.62	0	0.72	1.04	0.34	0.72	0	ORTHOMCL20876	2	0	0	0	0
Solyc01g011230	Aspartyl protease family protein (AHRD V1 ***- D7LJ61_ARALY)	0.29	0.59	0.68	1.04	0.33	1.34	0	0.35	0	0	2.95	1.28	2	1.34	0.45	0.74	0.32	0.98	0.26	0.8	0	0	0	0.33	0.33	1.51	0	0	NA
Solyc01g011240	Unknown Protein (AHRD V1)	0	0	0	0	0	0	0	0	0	0	0	0	0	0	0	0	0	0	0	0	0	0	0	0	0	0	0	0	ORTHOMCL651	7	5	3	0	0
Solyc01g011250	Unknown Protein (AHRD V1); contains Interpro domain(s) IPR015410 Region of unknown function DUF1985	0	0	0	0	0	0	0	0	0	0	0	0	0	0	0	0	0	0	0	0	0	0	0	0	0	0	0	0	ORTHOMCL651	7	5	3	0	0
Solyc01g011260	Aspartyl protease family protein (AHRD V1 ***- D7LJ61_ARALY); contains Interpro domain(s) IPR001461 Peptidase A1	0	0	0	0	0	0	0	0	0	0	0	0	0	0	0	0	0	0	0	0	0	0	0	0	0	0	0	0	ORTHOMCL11247	4	0	0	0	0
Solyc01g011270	Aspartyl protease family protein (AHRD V1 ***- D7LJ61_ARALY)	0.25	0	0	0.3	0.29	0	0	0	0.35	0	0	0.74	0.29	0.29	0.39	0.32	0.27	0.28	0	0.23	0	0	0	0	0	0	0	0	ORTHOMCL20875	2	0	0	0	0
Solyc01g011280	Unknown Protein (AHRD V1)	0	0	0	0	0	0	0	0	0	0	0	0	0	0	0	0	0	0	0	0	0	0	0	0	0	0	0	0	ORTHOMCL651	7	5	3	0	0
Solyc01g011290	HAT family dimerisation domain containing protein (AHRD V1 **-- Q2R0X2_ORYSJ)	0	0	0	0	0	0	0	0	0	0	0	0	0	0	0	0	0	0	0	0	0	0	0	0	0	0	0	0	NA
Solyc01g011300	Aspartyl protease family protein (AHRD V1 -**- D7LJ61_ARALY); contains Interpro domain(s) IPR001461 Peptidase A1	0	0	0	0	0	0	0	0	0	0	0	0	0	0	0	0	0	0	0	0	0	0	0	0	0	0	0	0	ORTHOMCL20875	2	0	0	0	0
Solyc01g011310	Aspartyl protease family protein (AHRD V1 **-- D7LJ61_ARALY); contains Interpro domain(s) IPR001461 Peptidase A1	0.1	0	0.12	0	0	0	0	0	0	0	0	0	0	0	0	0	0.11	0	0	0	0	0	0	0	0	0	0	0	ORTHOMCL11247	4	0	0	0	0
Solyc01g011320	Aspartyl protease family protein (AHRD V1 ***- D7LJ61_ARALY); contains Interpro domain(s) IPR001461 Peptidase A1	0.2	0.2	0.23	0	0	0	0	0	0	0	0	0	0	0	0	0	0.22	0	0	0	0	0.32	0	0	0	0	0	0	ORTHOMCL11247	4	0	0	0	0
Solyc01g011330	Aspartyl protease family protein (AHRD V1 **-- D7M1J9_ARALY); contains Interpro domain(s) IPR001461 Peptidase A1	0	0	0	0	0	0	0	0	0	0.22	0	0	0	0	0	0	0	0.18	0.14	0	0	0	0	0.18	0	0	0	0	ORTHOMCL20876	2	0	0	0	0
Solyc01g011340	Serine/threonine-protein phosphatase (AHRD V1 **** Q6VUQ5_SOLLC); contains Interpro domain(s) IPR006186 Serine/threonine-specific protein phosphatase and bis(5-nucleosyl)-tetraphosphatase	42.6	36.52	35.82	35.5	32.15	33.81	49.56	41.81	40.96	43.43	36.89	33.01	21	20.25	38.67	38.34	36.26	33.16	31.12	33.89	37.14	37.73	38.19	33.9	30.85	24.7	30.92	24.57	ORTHOMCL2049	2	2	1	2	2
Solyc01g011350	cDNA clone J013057D02 full insert sequence (AHRD V1 **-- B7EBX1_ORYSJ)	26.15	24.82	17.19	16.81	23.62	27.52	41.75	37.85	189.18	173.67	200.11	177.85	332.37	323.11	121.52	119.49	82.28	82.39	77.03	78.5	60.33	67.12	41.05	42.61	44.66	50.18	6.46	8.39	ORTHOMCL3967	1	1	2	1	2
Solyc01g011370	Unknown Protein (AHRD V1)	0.26	0	0	0	0	0	0	0.32	0	0	0	0	0	0	0	0	0	0	0.23	0.24	0	0	0	0	0	0	0	0	ORTHOMCL134	36	1	0	0	0
Solyc01g011390	Unknown Protein (AHRD V1)	13.22	16.51	35.9	33.32	0	0	0	0	0	0.14	0	0	0.12	0.23	0	0	0	0.11	0	0	0	0	0	0	0	0	0	0	NA
Solyc01g011400	Unknown Protein (AHRD V1)	0	0	0	0	0	0	0	0	0	0	0	0	0	0	0	0	0	0	0	0	0	0	0	0	0	0	0	0	ORTHOMCL11	74	2	0	1	2
Solyc01g011410	NADH-quinone oxidoreductase subunit D (AHRD V1 ***- NUOD_DEIGD); contains Interpro domain(s) IPR001135 NADH-quinone oxidoreductase, subunit D	1.15	0.39	1.34	0	2.18	0.89	0.46	0.46	1.07	1.08	3.91	3.97	2.65	0.89	0.59	1.47	1.25	0.43	3.08	1.42	5.38	6.75	4.04	4.74	0.89	1	7.51	0	ORTHOMCL20874	1	1	0	0	0
Solyc01g011420	Unknown Protein (AHRD V1)	0	0	0	0	0	0	0	0	0	0	0	0	2.72	1.37	1.83	1.51	0	2.66	2.11	0	7.37	7.57	0	0	4.1	1.54	0	0	NA
Solyc01g011430	Diacylglycerol O-acyltransferase (AHRD V1 ***- A5UWY0_ROSS1); contains Interpro domain(s) IPR009721 Protein of unknown function DUF1298	0.24	0.45	0.23	0.12	0.11	0.06	6.33	7.85	0	0	0	0.07	0	0.06	0	0	0	0	0	0	5.09	1.01	0.77	1.86	0.11	0.13	0	0	ORTHOMCL700	1	2	3	5	3
Solyc01g011450	Unknown Protein (AHRD V1)	0	0	0	0	0.22	0.22	0	0	0	0	0	0	0	0	0	0	0	0	0	0	0	0	0	0	0	0	0	0	ORTHOMCL11246	4	0	0	0	0
Solyc01g011460	Unknown Protein (AHRD V1)	0	0	0	0	0	0.22	0	0	0	0	0	0	0	0	0	0	0	0	0	0	0	0	0	0	0	0	0	0	NA
Solyc01g011470	Major latex-like protein (AHRD V1 **-- B5THI3_PANGI); contains Interpro domain(s) IPR000916 Bet v I allergen	0	0	0	0	0	0	0	0	0	0	0	0	0	0	0	0	0	0	0	0	0	0	0	0	0	0	7.18	21.93	NA
Solyc01g011480	Photosystem II CP43 chlorophyll apoprotein (AHRD V1 ***- B7T461_9ROSI); contains Interpro domain(s) IPR000932 Photosystem antenna protein-like	0	0	0	0	0	0	0	0	0	0	0	0	0	0	0	0	0	0	0	0	0	0	0	0	0	0	0	0	NA
Solyc01g011490	O-acyltransferase WSD1 (AHRD V1 **-- WSD1_ARATH)	0.4	0.61	0.23	0	0.22	0	0	0	0	0	0	0	0	0	0	0	0	0	0	0	0	0	0	0	0	0	0	0	NA
Solyc01g011500	Unknown Protein (AHRD V1)	0	0	0	0	0	0	0	0	0	0	0	0	0	0	0	0	0	0	0	0.4	0	0	0	0	0	0	0	0	NA
Solyc01g011510	Aldehyde dehydrogenase (AHRD V1 ***- Q71LY7_ORYSI); contains Interpro domain(s) IPR012394 Aldehyde dehydrogenase NAD(P)-dependent IPR015590 Aldehyde dehydrogenase	60.45	58.21	72.75	67.29	43.39	42.59	5.8	5.55	17.4	18.65	15.51	13.2	6.96	6.41	13.55	13.28	11.5	13.53	17.2	16.17	10.47	8.46	4.33	4.61	1.84	2.88	27.48	28.11	ORTHOMCL1343	2	2	1	2	3
Solyc01g011520	Dicer-like protein (AHRD V1 *-*- B9HYI3_POPTR); contains Interpro domain(s) IPR000999 Ribonuclease III	0	0	0	0	0	0	0	0	0	0	0	0	0	0	0	0	0	0	0	0	0	0	0	0	0	0	0	0	ORTHOMCL421	18	0	0	0	0
Solyc01g011530	Unknown Protein (AHRD V1)	0	0	0	0	0	0	0	0	0	0	0	0	0	0	0	0	0	0	0	0	0	0	0	0	0	0	0	0	NA
Solyc01g011540	Dicer-like protein (AHRD V1 ***- B9HYI3_POPTR); contains Interpro domain(s) IPR000999 Ribonuclease III	0	0	0	0	0	0	0	0	0	0	0	0	0	0	0	0	0	0	0	0	0	0	0	0	0	0	0	0	ORTHOMCL4104	6	0	0	0	0
Solyc01g012540	Dicer-like protein (AHRD V1 ***- B9HYI3_POPTR); contains Interpro domain(s) IPR000999 Ribonuclease III	0	0	0	0	0	0	0	0	0	0	0	0	0	0	0	0	0	0	0	0	0	0	0	0	0	0	0	0	ORTHOMCL4104	6	0	0	0	0
Solyc01g012550	Endoribonuclease Dicer (AHRD V1 ***- DICER_XENTR); contains Interpro domain(s) IPR000999 Ribonuclease III	0	0	0	0	0	0	0	0	0	0	0	0	0	0	0	0	0	0	0	0	0	0	0	0	0	0	0	0	ORTHOMCL2851	7	0	0	0	0
Solyc01g012560	Unknown Protein (AHRD V1)	0	0	0	0	0	0	0	0	0	0	0	0	0	0	0	0	0	0	0	0	0	0	0	0	0	0	0	0	ORTHOMCL20912	2	0	0	0	0
Solyc01g012570	Dicer-like protein (AHRD V1 *-*- B9HHX6_POPTR)	0	0	0	0	0	0	0	0	0	0	0	0	0	0	0	0	0	0	0	0	0	0	0	0	0	0	0	0	ORTHOMCL421	18	0	0	0	0
Solyc01g012580	Endoribonuclease Dicer homolog 2b (AHRD V1 ***- DCL2B_ORYSJ); contains Interpro domain(s) IPR000999 Ribonuclease III	0.33	0.34	0.39	0.8	0	1.55	1.21	0.8	0	0	1.13	0	0.77	0	1.55	1.7	3.27	1.88	3.27	2.47	0	0	0	0	0	0	0	0	ORTHOMCL4104	6	0	0	0	0
Solyc01g012590	Dicer-like protein (AHRD V1 ***- B9HYI3_POPTR)	0	0	0	0	0	0	0	0	0	0	0	0	0	0	0	0	0	0	0	0	0	0	0	0	0	0	0	0	ORTHOMCL20873	2	0	0	0	0
Solyc01g012600	Dicer-like protein (AHRD V1 *-*- B9HYI3_POPTR)	0	0	0	0	0	0	0	0	0	0	0	0	0	0	0	0	0	0	0	0	0	0	0	0	0	0	0	0	ORTHOMCL421	18	0	0	0	0
Solyc01g012610	Dicer-like protein (AHRD V1 ***- B9HYI3_POPTR); contains Interpro domain(s) IPR000999 Ribonuclease III	0	0	0	0	0	0	0	0	0	0	0	0	0	0	0	0	0	0	0	0	0	0	0	0	0	0	0	0	ORTHOMCL2851	7	0	0	0	0
Solyc01g012620	Ulp1 protease family C-terminal catalytic domain containing protein (AHRD V1 ***- Q60D46_SOLDE)	0	0	0	0.27	0	0	0	0	0	0	0	0	0	0	0	0.29	0	0.26	0.4	0.42	0	0	0	0	0	0	0	0	ORTHOMCL4	93	2	0	0	0
Solyc01g012630	Dicer-like protein (AHRD V1 ***- B9HYI3_POPTR); contains Interpro domain(s) IPR000999 Ribonuclease III	0	0	0	0	0	0	0	0	0	0	0	0	0	0	0	0	0	0	0	0	0	0	0	0	0	0	0	0	ORTHOMCL421	18	0	0	0	0
Solyc01g012640	Dicer-like protein (AHRD V1 *-*- B9HYI3_POPTR); contains Interpro domain(s) IPR000999 Ribonuclease III	0	0	0	0	0	0	0	0	0	0	0	0	0	0	0	0	0	0	0	0	0	0	0	0	0	0	0	0	ORTHOMCL11245	4	0	0	0	0
Solyc01g012650	Dicer-like protein 2 (AHRD V1 ***- B9UDZ4_BRACM); contains Interpro domain(s) IPR000999 Ribonuclease III	0.21	0	0	0.51	0	0.25	0	0	0	0	0	0	0	0	0.65	0	0.23	0	0.94	0	0	0	0	0	0	0	0	0	ORTHOMCL4104	6	0	0	0	0
Solyc01g012660	Dicer-like protein (AHRD V1 ***- B9HYI3_POPTR)	0	0	0	0	0	0	0	0	0	0	0	0	0	0	0	0	0	0	0	0	0	0	0	0	0	0	0	0	ORTHOMCL20873	2	0	0	0	0
Solyc01g012670	Dicer-like protein (AHRD V1 ***- B9HYI3_POPTR); contains Interpro domain(s) IPR000999 Ribonuclease III	0	0	0	0	0	0	0	0	0	0	0	0	0	0	0	0	0	0	0	0	0	0	0	0	0	0	0	0	ORTHOMCL421	18	0	0	0	0
Solyc01g012680	Endoribonuclease Dicer homolog 2b (AHRD V1 ***- DCL2B_ORYSJ)	0	0	0	0	0	0	0	0	0	0	0	0	0	0	0	0	0	0	0	0	0	0	0	0	0	0	0	0	ORTHOMCL2851	7	0	0	0	0
Solyc01g012690	LRR receptor-like serine/threonine-protein kinase, RLP	0	0	0	0	0	0	0	0	0	0	0	0	0	0	0	0	0	0	0	0	0	0	0	0.28	0	0	0	0	NA
Solyc01g012700	Aldehyde dehydrogenase (AHRD V1 ***- Q71LY7_ORYSI); contains Interpro domain(s) IPR012394 Aldehyde dehydrogenase NAD(P)-dependent IPR015590 Aldehyde dehydrogenase	10.22	10.12	13.53	9.63	5.67	6.03	0.52	0.39	2.41	2.75	2.21	0.96	0.75	0.5	2.34	2.07	1.3	1.71	2.8	2.51	1.52	0.87	0.57	0.37	0.25	0	2.73	1.42	NA
Solyc01g012710	Dicer-like protein (AHRD V1 ***- B9HYI3_POPTR)	0	0	0	0	0	0	0	0	0	0	0	0	0	0	0	0	0	0	0	0	0	0	0	0	0	0	0	0	ORTHOMCL421	18	0	0	0	0
Solyc01g012720	Dicer-like protein (AHRD V1 ***- B9HHX6_POPTR)	0	0	0	0	0	0	0	0	0	0	0	0	0	0	0	0	0	0	0	0	0	0	0	0	0	0	0	0	NA
Solyc01g012730	Dicel-like 2 (Fragment) (AHRD V1 *-*- B8ZYR7_NICBE)	0	0	0	0	0	0	0	0	0	0	0	0	0	0	0	0	0	0	0	0	0	0	0	0	0	0	0	0	ORTHOMCL421	18	0	0	0	0
Solyc01g012740	Dicer-like protein (AHRD V1 ***- B9HYI3_POPTR); contains Interpro domain(s) IPR000999 Ribonuclease III	0	0	0	0	0	0	0	0	0	0	0	0	0	0	0	0	0	0	0	0	0	0	0	0	0	0	0	0	ORTHOMCL421	18	0	0	0	0
Solyc01g012750	Aldehyde dehydrogenase family protein expressed (AHRD V1 ***- Q53NG7_ORYSJ); contains Interpro domain(s) IPR012394 Aldehyde dehydrogenase NAD(P)-dependent IPR015590 Aldehyde dehydrogenase	26.86	27.2	27.83	29.91	23.81	22.1	2.87	2.87	9.21	8.59	2.7	6.27	2.75	3.07	6.55	5.41	5.48	6.57	8.99	6.14	2.89	3.82	2.33	2.08	0.61	2.08	15.95	24.66	NA
Solyc01g012760	Aldehyde dehydrogenase (AHRD V1 **** Q71LY7_ORYSI); contains Interpro domain(s) IPR012394 Aldehyde dehydrogenase NAD(P)-dependent IPR015590 Aldehyde dehydrogenase	11.49	9.24	10.97	4.91	5.74	8.69	0.99	0.66	0.95	2.5	1.16	1.41	0.31	0	0.84	1.57	1.63	1.38	2.55	1.39	1.27	1.31	0.24	0.61	0.16	0.36	0.38	1.78	NA
Solyc01g013760	Unknown Protein (AHRD V1)	0	0	0	0	0	0	0	0	0	0	0	0	0	0	0	0	0	0	0	0	0	0	0	0	0	0	0	0	ORTHOMCL4104	6	0	0	0	0
Solyc01g013770	Unknown Protein (AHRD V1)	0	0	0	0	0	0	0	0	0	0	0	0	0	0	0	0	0	0	0	0	0	0	0	0	0	0	0	0	NA
Solyc01g013780	Dicer-like protein (AHRD V1 ***- B9HYI3_POPTR); contains Interpro domain(s) IPR000999 Ribonuclease III	0	0	0	0	0	0	0	0	0	0	0	0	0	0	0	0	0	0	0	0	0	0	0	0	0	0	0	0	ORTHOMCL11245	4	0	0	0	0
Solyc01g013790	Dicer-like protein (AHRD V1 ***- B9HYI3_POPTR)	0	0	0	0	0	0	0	0	0	0	0	0	0	0	0	0	0	0	0	0	0	0	0	0	0	0	0	0	ORTHOMCL2851	7	0	0	0	0
Solyc01g013800	Dicer-like protein (AHRD V1 *-*- B9HYI3_POPTR)	0	0	0	0	0	0	0	0	0	0	0	0	0	0	0	0	0	0	0	0	0	0	0	0	0	0	0	0	ORTHOMCL421	18	0	0	0	0
Solyc01g013810	Dicel-like 2 (Fragment) (AHRD V1 ***- B8ZYR7_NICBE)	0	0	0	0	0	0	0	0	0	0	0	0	0	0	0	0	0	0	0	0	0	0	0	0	0	0	0	0	ORTHOMCL2851	7	0	0	0	0
Solyc01g013820	Unknown Protein (AHRD V1)	0	0	0	0	0	0	0	0	0	0	0	0	0	0	0	0	0	0	0	0	0	0	0	0	0	0	0	0	NA
Solyc01g013830	Dicer-like protein (AHRD V1 ***- B9HYI3_POPTR); contains Interpro domain(s) IPR000999 Ribonuclease III	0	0	0	0	0	0	0	0	0	0	0	0	0	0	0	0	0	0	0	0	0	0	0	0	0	0	0	0	ORTHOMCL421	18	0	0	0	0
Solyc01g013840	Dicer-like protein (AHRD V1 ***- B9HYI3_POPTR); contains Interpro domain(s) IPR000999 Ribonuclease III	0	0	0	0	0	0	0	0	0	0	0	0	0	0	0	0	0	0	0	0	0	0	0	0	0	0	0	0	ORTHOMCL11245	4	0	0	0	0
Solyc01g013850	Dicer-like protein (AHRD V1 *-*- B9HYI3_POPTR); contains Interpro domain(s) IPR000999 Ribonuclease III	0	0	0	0	0	0	0	0	0	0	0	0	0	0	0	0	0	0	0	0	0	0	0	0	0	0	0	0	ORTHOMCL421	18	0	0	0	0
Solyc01g013860	Dicer-like protein (AHRD V1 ***- B9HYI3_POPTR); contains Interpro domain(s) IPR000999 Ribonuclease III	0	0	0	0	0	0	0	0	0	0	0	0	0	0	0	0	0	0	0	0	0	0	0	0	0	0	0	0	ORTHOMCL2851	7	0	0	0	0
Solyc01g013870	Hcr9-4E (AHRD V1 ***- O50024_SOLHA)	0	0	0	0	0	0	0	0	0	0	0	0	0	0	0	0	0	0	0	0	0	0	0	0	0	0	0	0	NA
Solyc01g013880	LRR receptor-like serine/threonine-protein kinase, RLP	0	0	0	0	0	0	0	0	0	0	0	0	0	0	0	0	0	0	0	0	0	0	0	0	0	0	0	0	NA
Solyc01g013890	Aldehyde dehydrogenase (AHRD V1 ***- Q71LY7_ORYSI); contains Interpro domain(s) IPR012394 Aldehyde dehydrogenase NAD(P)-dependent IPR015590 Aldehyde dehydrogenase	15.66	15.08	18.33	18.74	13.92	12.76	1.6	1.72	4.96	4.31	2.43	3.62	1.64	2.01	4.41	2.99	3.55	4.03	5.1	4.26	2.54	2.12	1.44	1.49	0.24	0.8	6.28	14.39	NA
Solyc01g013900	Aldehyde dehydrogenase (AHRD V1 ***- Q71LY7_ORYSI); contains Interpro domain(s) IPR012394 Aldehyde dehydrogenase NAD(P)-dependent IPR015590 Aldehyde dehydrogenase	33.12	27.04	42.22	36.2	17.69	15.08	1.91	3.05	10.15	9.4	6.47	6.11	2.92	3.31	3.43	4.86	5.53	6.44	6.51	7.95	4.45	5.59	3.35	4.99	1.1	1.24	11.11	24.46	NA
Solyc01g013910	Unknown Protein (AHRD V1)	0	0	0	0	0	0	0	0	0	0	0	0	0	0	0	0	0	0	0	0	0	0	0	0	0	0	0	0	NA
Solyc01g013920	Endoribonuclease Dicer homolog 2a (AHRD V1 ***- DCL2A_ORYSJ); contains Interpro domain(s) IPR000999 Ribonuclease III	0	0	0	0	0	0	0	0	0	0	0	0	0	0	0	0	0	0	0	0	0	0	0	0	0	0	0	0	ORTHOMCL421	18	0	0	0	0
Solyc01g013930	Dicer-like protein (AHRD V1 ***- B9HYI3_POPTR)	0	0	0	0	0	0	0	0	0	0	0	0	0	0	0	0	0	0	0	0	0	0	0	0	0	0	0	0	ORTHOMCL2851	7	0	0	0	0
Solyc01g013940	Dicel-like 2 (Fragment) (AHRD V1 ***- B8ZYR7_NICBE)	0	0	0	0	0	0	0	0	0	0	0	0	0	0	0	0	0	0	0	0	0	0	0	0	0	0	0	0	ORTHOMCL421	18	0	0	0	0
Solyc01g013950	Dicer-like protein (AHRD V1 ***- B9HYI3_POPTR); contains Interpro domain(s) IPR000999 Ribonuclease III	0	0	0	0	0	0	0	0	0	0	0	0	0	0	0	0	0	0	0	0	0	0	0	0	0	0	0	0	ORTHOMCL421	18	0	0	0	0
Solyc01g013960	LRR receptor-like serine/threonine-protein kinase, RLP	0	0	0	0	0	0	0	0	0	0	0	0	0	0	0	0	0	0	0	0	0	0	0	0	0	0	0	0	NA
Solyc01g013970	Unknown Protein (AHRD V1)	0	0	0	0	0	0	0	0	0	0	0	0	0	0	0	0	0	0	0	0	0	0	0	0	0	0	0	0	NA
Solyc01g013980	Vacuolar protein sorting-associated protein 33 homolog (AHRD V1 ***- VPS33_ARATH)	0	0	0	0	0	0	0	0	0	0	0	0	0	0	0	0	0	0	0	0	0	0	0	0	0	0	0	0	NA
Solyc01g013990	Unknown Protein (AHRD V1)	0	0	0	0	0	0	0	0	0	0	0	0	0	0	0	0	0	0	0	0	0	0	0	0	0	0	0	0	NA
Solyc01g014000	Unknown Protein (AHRD V1)	0	0	0	0	0	0	0	0	0	0	0	0	0	0	0	0	0	0	0	0	0	0	0	0	0	0	0	0	NA
Solyc01g014010	Unknown Protein (AHRD V1)	0	0	0	0	0	0	0	0	0	0	0	0	0	0	0	0	0	0	0	0	0	0	0	0	0	0	0	0	NA
Solyc01g014020	LRR receptor-like serine/threonine-protein kinase, RLP	0	0	0	0	0	0	0	0	0	0	0	0	0	0	0	0	0	0	0	0	0	0.22	0	0	0	0	0	0	NA
Solyc01g014030	Unknown Protein (AHRD V1)	0	0	0	0	0	0	0	0	0	0	0	0	0	0	0	0	0	0	0	0	0	0	0	0	0	0	0	0	NA
Solyc01g014040	Unknown Protein (AHRD V1)	0	0	0	0	0	0	0	0	0	0	0	0	0	0	0	0	0	0	0	0	0	0	0	0	0	0	0	0	NA
Solyc01g014050	Unknown Protein (AHRD V1)	0	0	0	0	0	0	0	0	0	0	0	0	0	0	0	0	0	0	0	0	0	0	0	0	0	0	0	0	NA
Solyc01g014060	Blue copper protein (AHRD V1 **-- B6U7P6_MAIZE); contains Interpro domain(s) IPR003245 Plastocyanin-like	0	0	0	0	0	0	0	0	0	0	0	0	0	0	0	0	0	0	0	0	0	0	0	0	0	0	0	0	ORTHOMCL20872	1	1	0	0	0
Solyc01g014070	Blue copper protein (AHRD V1 *--- B6TCC4_MAIZE); contains Interpro domain(s) IPR003245 Plastocyanin-like	0	0	0	0	0	0	0	0	0	0	0	0	0	0	0	0	0	0	0	0	0	0	0	0	0	0	0	0	ORTHOMCL20871	1	1	0	0	0
Solyc01g014080	Gag-Pol polyprotein (AHRD V1 ***- B8YLY6_MEDTR); contains Interpro domain(s) IPR013103 Reverse transcriptase, RNA-dependent DNA polymerase	0	0	0	0	0	0	0	0	0	0	0	0	0	0	0	0	0	0	0	0	0	0	0	0	0	0	0	0	ORTHOMCL422	18	0	0	0	0
Solyc01g014090	Plant synaptotagmin (AHRD V1 ***- B9N719_POPTR); contains Interpro domain(s) IPR000008 C2 calcium-dependent membrane targeting	0	0	0	0	0	0	0	0	0	0	0	0	0	0	0	0	0	0	0	0	0	0	0	0	0	0	0	0	NA
Solyc01g014100	Unknown Protein (AHRD V1)	6.89	6.19	5.82	11.24	0	0	0.25	0	25.74	17.01	13.07	10.15	10.05	12.28	0.32	0	0	0	0	0	2.59	1.67	0	0.23	0	0	0	0	ORTHOMCL20870	1	1	0	0	0
Solyc01g014110	Unknown Protein (AHRD V1)	1.4	1.67	2.72	1.4	1.86	2.16	5.61	5.33	1.62	0.99	3.17	3.79	0.8	0.81	1.8	0.89	0	0.26	0.21	0.43	1.09	1.12	0.82	0.52	0.27	0	10.44	10.51	NA
Solyc01g014120	Unknown Protein (AHRD V1)	1.86	1.56	2.16	2.46	3.98	5.74	6.28	6.04	1.29	1.3	2.36	2.05	2.66	3.14	1.84	1.77	0.29	0.37	0.12	0.24	2.78	1.9	1.28	0.96	1.6	0.69	8.6	5.67	NA
Solyc01g014130	LRR receptor-like serine/threonine-protein kinase, RLP	0	0	0	0	0	0	0	0	0	0	0	0	0	0	0	0	0	0	0	0	0	0	0	0	0	0	0	0	NA
Solyc01g014140	Hcr9-9D (AHRD V1 ***- O50021_SOLPI)	1.55	2.38	1.35	0.93	4.18	6.49	3.49	3.02	0.54	0.82	0	0.86	0.22	0.22	0	0	0	0	0	0	0	0	0	0	0	0	0	0	NA
Solyc01g014150	LRR receptor-like serine/threonine-protein kinase, RLP	0.13	0	0	0	0	0	0	0	0	0	0	0	0	0	0	0	0	0	0	0	0	0	0	0	0	0	0	0	NA
Solyc01g014160	LRR receptor-like serine/threonine-protein kinase, RLP	0	0	0	0	0	0	0	0	0	0	0	0	0	0	0	0	0	0	0	0	0	0.19	0	0.2	0.07	0	0.08	0	NA
Solyc01g014170	Hcr9-9A (AHRD V1 ***- O50023_SOLPI)	0	0	0	0	0	0	0	0	0	0	0	0	0	0	0	0	0	0	0	0	0	0	0	0	0	0	0	0	NA
Solyc01g014180	Zinc finger A20 and AN1 domain-containing stress-associated protein 8 (AHRD V1 ***- SAP8_ORYSJ); contains Interpro domain(s) IPR000058 Zinc finger, AN1-type	167.83	155.08	158.51	147.56	90.52	95.11	158.81	147.82	154.22	157.44	193.27	170.77	417.08	416.92	481.71	462.49	589.33	576.46	342.51	351.76	481.71	530.99	494.64	490.53	455.7	486.05	76.69	76.4	ORTHOMCL1513	3	3	1	1	2
Solyc01g014190	Unknown Protein (AHRD V1)	0	0	0	0	0	0	0	0	0	0	0	0	0	0	0	0	0	0	0	0	0	0	0	0	0	0	0	0	NA
Solyc01g014200	Unknown Protein (AHRD V1)	12.26	12.55	10.27	11.74	1.67	4.53	1.77	1.76	11.56	20.68	10.8	10.85	16.32	14.72	12.85	12.47	2.13	2.76	0	0.45	0	0	0	0	0	0	0	0	NA
Solyc01g014210	ADP ATP carrier protein-like (AHRD V1 **** Q2XTC3_SOLTU); contains Interpro domain(s) IPR002113 Adenine nucleotide translocator 1	0	0.1	0	0	0	0	0	0	0	0.13	0	0	0	0	0.15	0	0	0	0.08	0	0	0.15	0.17	0	0.11	0	0	0	NA
Solyc01g014220	cDNA clone J075118M20 full insert sequence (AHRD V1 ***- B7F980_ORYSJ); contains Interpro domain(s) IPR006852 Protein of unknown function DUF616	1.85	0.71	0.67	0.69	2.88	2.14	2.64	2.77	3.53	1.95	2.55	1.88	0.53	1.33	3.39	2.06	0.63	0.39	0.21	0.21	1.62	0.74	1.01	0.39	0.4	0.15	4.36	3.18	NA
Solyc01g014230	U-box domain-containing protein 4 (AHRD V1 **-- PUB4_ARATH); contains Interpro domain(s) IPR011989 Armadillo-like helical	3.43	3.64	8.78	7.76	4.24	4.43	13.78	13.95	5.06	5.17	7.51	6.49	9.28	9.04	11.92	10.92	9.52	9.33	11.14	10.29	9.48	9.79	5.63	6.7	2.68	2.13	3.77	4.92	ORTHOMCL1877	2	2	2	1	2
Solyc01g014240	TMV resistance protein N (AHRD V1 ***- TMVRN_NICGU)	0	0	0	0	0	0	0	0	0	0	0	0	0	0	0	0	0	0	0	0	0	0	0	0	0	0	0	0	NA
Solyc01g014250	Unknown Protein (AHRD V1)	7.42	6.81	8.09	7.61	2.92	4.89	2.72	2.18	3.36	4.89	8.71	10.27	18.92	16.24	15.85	17.51	38.26	40.31	32.97	24.76	36.91	51.95	45.9	51.7	48.8	53.03	0.21	2.85	NA
Solyc01g014260	Unknown Protein (AHRD V1)	0	0	0	0	0	0	0	0	0	0	0	0	0	0	0	0	0	0	0	0	0	0	0	0	0	0	0	0	NA
Solyc01g014270	Unknown Protein (AHRD V1)	10.58	11.42	11.09	14.05	15.29	16.65	0	0.28	13.22	15.19	27.56	29.66	41.62	39.06	25.44	22.03	15.02	14.51	16.44	15.37	0	0.19	0	0	0	0	0	0.17	NA
Solyc01g014280	Unknown Protein (AHRD V1)	0	0	0	0	0	0	0	0.09	0	0	0	0.11	0	0.08	0	0	0	0	0	0	0	0	0	0	0	0	0	0	NA
Solyc01g014290	Unknown Protein (AHRD V1)	0	0	0	0	0	0	0	0	0	0	0	0	0	0	0	0	0	0	0	0	0	0	0	0	0	0	0	0	ORTHOMCL20869	1	1	0	0	0
Solyc01g014300	PR-protein (Fragment) (AHRD V1 **-- A1DUR9_CAPAN)	0	0	0	0	0	0	0	0	0	0	0	0	0	0	0	0	0	0	0	0	0	0	0	0	0	0	0	0	NA
Solyc01g014310	LRR receptor-like serine/threonine-protein kinase, RLP	0	0	0	0	0	0	0	0	0	0	0	0	0	0	0	0	0	0	0	0	0	0.29	0	0.2	0	0	0	0	NA
Solyc01g014320	S-adenosyl-L-methionine salicylic acid carboxyl methyltransferase (AHRD V1 **** A7XZE9_9MAGN); contains Interpro domain(s) IPR005299 SAM dependent carboxyl methyltransferase	2.57	1.58	0.84	1.23	11.06	10.32	0	0	0	0	0	0	0	0	0	0	0	0.12	0	0	0	0	0	0	0	0	0.72	0.15	ORTHOMCL20868	1	1	0	0	0
Solyc01g014330	S-adenosyl-L-methionine carboxyl methyltransferase family protein (AHRD V1 -**- D7KVS6_ARALY); contains Interpro domain(s) IPR005299 SAM dependent carboxyl methyltransferase	1.1	0.32	0.37	0.19	4.1	3.81	0.19	0	0	0	0	0	0	0	0	0	0	0	0	0	0	0	0	0	0	0	0	0.46	ORTHOMCL20867	1	1	0	0	0
Solyc01g014340	Unknown Protein (AHRD V1)	0	0	0	0	0	0	0	0.17	0	0	0	0	0	0	0	0	0	0	0.12	0	0	0	0	0	0	0	0	0	ORTHOMCL62	50	0	0	0	0
Solyc01g014350	Kinase family protein (AHRD V1 ***- D7LBH2_ARALY)	0	0	0	0	0	0	0	0	0	0	0	0	0	0	0	0	0	0	0	0	0	0	0	0	0	0	0	0	NA
Solyc01g014360	Unknown Protein (AHRD V1)	0	0	0	0	0	0	0	0	0	0	0	0	0	0	0	0	0	0	0	0	0	0	0	0	0	0	0	0	NA
Solyc01g014370	Plant synaptotagmin integral membrane double C2 domain protein (AHRD V1 **-- A9TQ09_PHYPA); contains Interpro domain(s) IPR018029 C2 membrane targeting protein	0	0	0	0	0	0	0	0	0	0	0	0	0	0	0	0	0	0	0	0	0	0	0	0	0	0	0	0	NA
Solyc01g014380	Unknown Protein (AHRD V1)	1.13	1.61	2.12	2.11	4.21	4.65	4.46	4.53	0.35	1.15	1.6	1.39	2.17	1.53	2.04	2.56	0.34	0.42	0.22	0	3.42	2.51	0.88	0.92	0.8	0.49	5.44	3.56	NA
Solyc01g014390	Unknown Protein (AHRD V1)	0.42	0	0	0	0	0	0	0	0	0	0	0	0	0	0	0	0	0	0	0	0	0	0	0	0	0	0	0	NA
Solyc01g014400	Dicer-like protein (AHRD V1 ***- B9HHX6_POPTR)	0	0	0	0	0	0	0	0	0	0	0	0	0	0	0	0	0	0	0	0	0	0	0	0	0	0	0	0	ORTHOMCL421	18	0	0	0	0
Solyc01g014410	Dicer-like protein (AHRD V1 ***- B9HHX6_POPTR); contains Interpro domain(s) IPR000999 Ribonuclease III	0	0	0	0	0	0	0	0	0	0	0	0	0	0	0	0	0	0	0	0	0	0	0	0	0	0	0	0	NA
Solyc01g014420	Dicer-like protein (AHRD V1 ***- B9HYI3_POPTR); contains Interpro domain(s) IPR000999 Ribonuclease III	0	0	0	0	0	0	0	0	0	0	0	0	0	0	0	0	0	0	0	0	0	0	0	0	0	0	0	0	ORTHOMCL421	18	0	0	0	0
Solyc01g014430	Dicer-like protein (AHRD V1 ***- B9HYI3_POPTR); contains Interpro domain(s) IPR000999 Ribonuclease III	0	0	0	0	0	0	0	0	0	0	0	0	0	0	0	0	0	0	0	0	0	0	0	0	0	0	0	0	ORTHOMCL4104	6	0	0	0	0
Solyc01g014440	Dicer-like protein B (Fragment) (AHRD V1 *-*- B0ZRP8_TRIAD); contains Interpro domain(s) IPR000999 Ribonuclease III	0	0	0	0	0	0	0	0	0	0	0	0	0	0	0	0	0	0	0	0	0	0	0	0	0	0	0	0	ORTHOMCL421	18	0	0	0	0
Solyc01g014450	Dicer-like protein (AHRD V1 ***- B9HYI3_POPTR); contains Interpro domain(s) IPR000999 Ribonuclease III	0	0	0	0	0	0	0	0	0	0	0	0	0	0	0	0	0	0	0	0	0	0	0	0	0	0	0	0	NA
Solyc01g014460	Endoribonuclease Dicer homolog 2a (AHRD V1 *-*- DCL2A_ORYSJ); contains Interpro domain(s) IPR000999 Ribonuclease III	0	0	0	0	0	0	0	0	0	0	0	0	0	0	0	0	0	0	0	0	0	0	0	0	0	0	0	0	ORTHOMCL421	18	0	0	0	0
Solyc01g014470	Unknown Protein (AHRD V1)	0	0	0	0.24	0	0.23	0	0	0	0.28	0	0.29	0	0	0	0	0	0	0	0	0	0	0	0	0	0	0	0	NA
Solyc01g014480	Ethylene insensitive 3 class transcription factor (AHRD V1 *-** D5L144_MALDO); contains Interpro domain(s) IPR006957 Ethylene insensitive 3	9.91	9.29	11.8	10.34	9.3	8.38	17.51	15.92	8.13	6.8	8.26	7.66	8.91	8.88	9.83	10.03	13.77	12.74	8.81	8.06	12.26	10.7	14.46	15.67	11.64	11.1	5.09	4.08	ORTHOMCL3687	2	1	1	1	2
Solyc01g014490	Type II DNA topoisomerase VI subunit B (AHRD V1 ***- C1MLZ8_MICPS); contains Interpro domain(s) IPR015320 DNA topoisomerase VI, subunit B, transducer	8.54	8.24	7.21	7.02	8.24	7.75	11.54	10.5	11.73	11.11	11.44	10.45	11.37	11.09	13.26	13.45	9.75	8.84	11.42	11.59	11.59	14.28	13.73	15.67	12.18	12.33	7.04	8.87	ORTHOMCL8664	1	1	1	1	1
Solyc01g014500	Unknown Protein (AHRD V1); contains Interpro domain(s) IPR005162 Retrotransposon gag protein	0	0	0	0	0	0	0	0	0	0	0	0	0	0	0	0	0	0	0	0	0	0	0	0	0	0	0	0	ORTHOMCL13938	3	0	0	0	0
Solyc01g014510	S-locus-specific glycoprotein S14 (Fragment) (AHRD V1 *--- SLSG4_BRAOL); contains Interpro domain(s) IPR001480 Curculin-like (mannose-binding) lectin	0	0	0	0	0	0	0	0	0	0	0	0	0	0	0	0	0	0	0	0	0	0	0	0	0	0	0	0	NA
Solyc01g014520	Receptor-like protein kinase (AHRD V1 **** Q39202_ARATH); contains Interpro domain(s) IPR002290 Serine/threonine protein kinase	0	0	0	0	0	0	0	0	0	0	0	0	0	0	0	0	0	0	0	0	0	0	0	0	0	0	0	0	NA
Solyc01g014530	Receptor like kinase (Fragment) (AHRD V1 *-*- A6N110_ORYSI)	0	0	0.4	0.31	0	0	0	0	0	0	0	0	0	0	0	0.11	0.47	0.49	0.77	0.8	0.4	0.83	1.21	1.36	0.4	0.11	0.24	0.25	NA
Solyc01g014540	Unknown Protein (AHRD V1); contains Interpro domain(s) IPR001480 Curculin-like (mannose-binding) lectin	0	0	0	0	0	0	0	0	0	0	0	0	0	0	0	0	0	0	0	0	0	0	0	0	0	0	0	0	NA
Solyc01g014550	LRR receptor-like serine/threonine-protein kinase FEI 2 (AHRD V1 *-** FEI2_ARATH); contains Interpro domain(s) IPR002290 Serine/threonine protein kinase	0	0	0	0	0	0	0	0	0	0	0	0	0	0	0	0	0	0	0	0	0	0	0	0	0	0	0	0	NA
Solyc01g014560	D-mannose binding lectin family protein expressed (AHRD V1 **-- Q2RAY8_ORYSJ); contains Interpro domain(s) IPR001480 Curculin-like (mannose-binding) lectin	0	0	0	0.08	0.08	0.15	0	0	0	0	0	0	0	0	0.1	0.08	0.43	0.45	1.9	2.22	2.9	5.22	8.66	8.45	2.54	1.74	2.14	0.29	ORTHOMCL21903	1	0	0	1	0
Solyc01g014570	Unknown Protein (AHRD V1)	0	0	0	0	0	0	0	0	0	0	0	0	0	0	0	0	0	0	0	0	0	0	0	0	0	0	0	0	ORTHOMCL394	19	0	0	0	0
Solyc01g014580	Unknown Protein (AHRD V1)	0	0	0	0	0	0	0	0	0	0	0	0	0	0	0	0	0	0	0	0	0	0	0	0	0	0	0	0	ORTHOMCL886	12	0	0	0	0
Solyc01g014600	Unknown Protein (AHRD V1)	0	0	0	0	0	0	0	0	0	0	0	0	0	0	0	0	0	0	0	0	0	0	0	0	0	0	0	0	ORTHOMCL13937	3	0	0	0	0
Solyc01g014610	Unknown Protein (AHRD V1)	0	0	0	0	0	0	0	0.49	0	0	0	0	0	0	0	0	0	0	0	0	0	0	0	0	0	0	0	0	NA
Solyc01g014620	Unknown Protein (AHRD V1)	2.73	3.03	0.53	3.27	2.58	1.31	2.73	5.73	0	0	0	0	0	0	0	0	0	0	0	0	0	0	0.4	0	0	0	3.17	2.31	NA
Solyc01g014630	Unknown Protein (AHRD V1)	0	0	0	0	0	0	0	0	0	0	0	0	0	0	0	0	0	0	0	0	0	0	0	0	0	0	0	0	ORTHOMCL763	13	0	0	0	0
Solyc01g014640	CCHC-type integrase (AHRD V1 ***- Q0ZCC5_POPTR); contains Interpro domain(s) IPR001480 Curculin-like (mannose-binding) lectin	0	0	0	0	0	0	0	0	0	0	0	0	0	0	0	0	0	0	0	0	0	0	0	0	0	0	0	0	NA
Solyc01g014650	Receptor-like protein kinase (AHRD V1 ***- Q39202_ARATH); contains Interpro domain(s) IPR011009 Protein kinase-like	0	0	0	0	0	0	0	0	0	0	0	0	0	0	0	0	0	0	0	0	0	0	0	0	0	0	0	0	NA
Solyc01g014660	Receptor like kinase (Fragment) (AHRD V1 ***- A6N110_ORYSI)	0	0	0	0	0	0	0	0	0	0	0	0	0	0	0	0	0	0	0	0	0	0	0	0	0	0	0	0	ORTHOMCL20866	2	0	0	0	0
Solyc01g014670	Unknown Protein (AHRD V1)	0	0	0	0	0	0	0	0	0	0	0	0	0	0	0	0	0	0	0	0	0	0	0	0	0	0	0	0	ORTHOMCL149	35	0	0	0	0
Solyc01g014680	CCHC-type integrase (AHRD V1 ***- Q0ZCC5_POPTR)	0	0	0	0	0	0	0	0	0	0	0	0	0	0	0	0	0	0	0	0	0	0	0	0	0	0	0	0	NA
Solyc01g014690	Receptor-like protein kinase (AHRD V1 ***- Q39202_ARATH); contains Interpro domain(s) IPR017442 Serine/threonine protein kinase-related	0	0	0	0	0	0	0	0	0	0	0	0	0	0	0	0	0	0	0	0	0	0	0	0	0	0	0	0	NA
Solyc01g014700	D-mannose binding lectin family protein expressed (AHRD V1 ***- Q10B65_ORYSJ); contains Interpro domain(s) IPR001480 Curculin-like (mannose-binding) lectin	0.08	0	0	0.09	0.18	0.63	0.37	0.09	0	0	0	0	0.27	0.18	0.72	0.59	0.76	0.61	0.21	0.14	0.12	0	0	0.17	0.09	0	0	0	ORTHOMCL20866	2	0	0	0	0
Solyc01g014710	Unknown Protein (AHRD V1); contains Interpro domain(s) IPR012876 Protein of unknown function DUF1677, plant	12	15.08	21.13	22.15	3.89	3.96	18.52	18.49	12.35	11.56	9.87	5.56	5.11	7.12	6.86	14.38	23.43	16.18	39.63	32.63	3.2	5.47	4.21	3.46	1.58	1.34	0.96	1.99	NA
Solyc01g014720	Ethylene-responsive transcription factor 11 (AHRD V1 *-*- ERF76_ARATH); contains Interpro domain(s) IPR001471 Pathogenesis-related transcriptional factor and ERF, DNA-binding	0	0	0	0	0	0	0	0	0	0	0	0	0	0	0	0	0.18	0	0.14	0	0	0	0	0	0	0	0	0	ORTHOMCL13936	1	2	0	0	0
Solyc01g014730	Unknown Protein (AHRD V1)	6.57	5.6	6.36	3.93	0	0	1.31	3.94	6.07	4.61	0	0	3.77	2.53	1.69	2.78	2.37	0	2.92	0	0	0	0	0	0	0	0	0	NA
Solyc01g014740	Unknown Protein (AHRD V1)	0	0	0.37	0	0.36	0	0.38	0	0	0	0.54	0.47	0	0	0.49	0	0.35	1.08	0.28	0	0	0	0	0	0	0	0	0	NA
Solyc01g014760	Unknown Protein (AHRD V1)	0	0	0	0	0	0	0	0	0	0	0	0	0	0	0	0	0	0	0	0	0	0	0	0	0	0	0	0	NA
Solyc01g014770	Ethylene receptor (AHRD V1 ***- C0ILN8_COFCA)	0	0	0	0	0	0	0	0	0	0	0	0	0	0	0	0.27	0.46	0	0	0.39	0	0	0	0	0	0	0	0	NA
Solyc01g014780	Dicer-like protein (AHRD V1 ***- B9HYI3_POPTR)	0	0	0	0	0	0	0	0	0	0	0	0	0	0	0	0	0	0	0	0	0	0	0	0	0	0	0	0	NA
Solyc01g014790	Dicer-like protein (AHRD V1 ***- B9HYI3_POPTR); contains Interpro domain(s) IPR000999 Ribonuclease III	0	0	0	0	0	0	0	0	0	0	0	0	0	0	0	0	0	0	0	0	0	0	0	0	0	0	0	0	NA
Solyc01g014800	Dicer-like protein (AHRD V1 ***- B9HYI3_POPTR); contains Interpro domain(s) IPR000999 Ribonuclease III	0	0	0	0	0	0	0	0	0	0	0	0	0	0	0	0	0	0	0	0	0	0	0	0	0	0	0	0	ORTHOMCL11245	4	0	0	0	0
Solyc01g014820	Inosine-uridine preferring nucleoside hydrolase family protein (AHRD V1 *-*- D7LYI5_ARALY); contains Interpro domain(s) IPR001910 Inosine/uridine-preferring nucleoside hydrolase	0	0.12	0	0	0.41	0.28	0.29	0.29	0	0	0	0	0	0	0	0	0	0	0	0	0	0	0	0	0	0	0	0	ORTHOMCL20865	2	0	0	0	0
Solyc01g014830	Extensin-like protein Dif10 (Fragment) (AHRD V1 ***- Q43504_SOLLC)	0	0	0	0	0	0	0	0	0	0	0	0	0	0	0	0	0	0	0	0	0	0	0	0	0	0	0	0	NA
Solyc01g014840	Tir-nbs-lrr, resistance protein	0.15	0.23	0.22	0.32	0.12	0.1	6.82	6.48	0.2	0.32	0.32	0.31	0.14	0.1	0.74	0.77	0.07	0.05	0.65	0.35	0.42	0.43	0.37	0.3	0.43	0.57	0.26	0.12	ORTHOMCL20864	1	1	0	0	0
Solyc01g014850	Zinc finger CCCH domain-containing protein 14 (AHRD V1 ***- C3H14_ORYSJ); contains Interpro domain(s) IPR018111 K Homology, type 1, subgroup	13.99	13.36	15.78	13.89	10.12	9.71	26.26	27.53	18.24	19.58	16.78	14.91	21.78	18.82	19.32	19.81	17.64	16.01	18.91	19.51	11.38	13.35	16.47	13.18	14.14	12.64	10	15.11	ORTHOMCL20863	1	1	0	0	0
Solyc01g014860	Zinc finger CCCH domain-containing protein 52 (AHRD V1 ***- C3H52_ARATH)	3.4	8.23	7.55	5.55	6.31	7.85	17.82	15.2	7.29	13.9	12.57	14.14	17.03	13.92	10.48	13.37	11.75	11.12	12.93	15.72	10.09	9.87	13.01	9.7	10.33	12.09	0.43	3.59	ORTHOMCL20862	1	1	0	0	0
Solyc01g014870	Ulp1 protease family C-terminal catalytic domain containing protein (AHRD V1 *-*- Q60D46_SOLDE)	0	0	0	0	0	0	0	0	0	0	0	0	0	0	0	0	0	0	0	0	0	0	0	0	0	0	0	0	ORTHOMCL62	50	0	0	0	0
Solyc01g014880	Unknown Protein (AHRD V1)	5.15	4.19	2.92	3.64	0	0	0	0	0	0	0	0	0	0	0	0	0	0	0	0	0	0	0	0	0	0	0	0	ORTHOMCL20861	2	0	0	0	0
Solyc01g014890	Unknown Protein (AHRD V1)	0	0	0	0	0	0	0	0	0	0	0	0	0	0	0	0	0	0	0	0	0	0	0	0	0	0	0	0	NA
Solyc01g014900	Unknown Protein (AHRD V1)	0	0	0	0	0	0	0	0	0	0	0	0	0	0	0	0	0	0	0	0	0	0	0	0	0	0	0	0	ORTHOMCL11244	4	0	0	0	0
Solyc01g014910	Transcription factor bHLH95 (AHRD V1 ***- BH095_ARATH); contains Interpro domain(s) IPR011598 Helix-loop-helix DNA-binding	0	0	0	0	0	0	0	0	0	0	0	0	0	0	0	0	0	0	0	0.08	0	0	0	0	0	0	0	0	ORTHOMCL20860	1	1	0	0	0
Solyc01g014920	Unknown Protein (AHRD V1)	0	0	0	0	0	0	0	0	0	0	0	0	0	0	0	0	0	0	0	0	0	0	0	0	0	0	0	0	ORTHOMCL2852	7	0	0	0	0
Solyc01g014930	LRR receptor-like serine/threonine-protein kinase, RLP	0	0	0	0	0	0	0	0	0	0	0	0	0	0	0	0	0	0	0	0	0	0.13	0	0	0	0.1	0	0	NA
Solyc01g014940	LRR receptor-like serine/threonine-protein kinase, RLP	0	0	0	0	0	0	0	0	0	0	0	0	0	0	0	0	0	0	0	0	0	0	0	0	0	0	0	0	NA
Solyc01g014950	Unknown Protein (AHRD V1)	0	0	0	0	0	0	0	0	0.3	0	0	0	0	0	0	0	0	0.25	0	0	0	0	0	0	0	0	0	0	NA
Solyc01g014960	Transcription factor bHLH95 (AHRD V1 ***- BH095_ARATH)	0	0	0	0	0	0	0	0	0	0	0	0	0	0	0	0	0	0	0	0	0	0	0	0	0	0	0	0	NA
Solyc01g014970	Unknown Protein (AHRD V1); contains Interpro domain(s) IPR006456 ZF-HD homeobox protein Cys/His-rich dimerisation region	0	0	0	0	0	0	0	0	0	0	0	0	0	0	0	0	0	0	0	0	0	0	0	0	0	0	0	0	ORTHOMCL20859	1	1	0	0	0
Solyc01g014980	Unknown Protein (AHRD V1)	0	0	0	0	0	0	0	0	0	0	0	0	0	0	0	0	0	0	0	0	0	0	0	0	0	0	0	0	ORTHOMCL11259	4	0	0	0	0
Solyc01g014990	Unknown Protein (AHRD V1)	0	0	0	0	0	0	0	0	0	0	0	0	0	0	0	0	0	0	0	0	0	0	0	0	0	0	0	0	NA
Solyc01g015000	Nitrogen regulatory protein P-II (AHRD V1 *-*- Q8DLA5_THEEB); contains Interpro domain(s) IPR002187 Nitrogen regulatory protein PII	40.29	41.01	27.36	25.06	20.01	19.69	12.69	10.52	32.34	24.66	51.83	45.14	45.41	45.69	18.74	21.04	31.16	31.49	28.82	32.07	35.32	38.05	52.79	56.18	45.82	50.92	57.44	67.49	NA
Solyc01g015010	Unknown Protein (AHRD V1)	0.49	0	0	0	0	0	0	0	0	0.69	0	0	0	0	0	0	0	0	0	0	0	0	0	0	0	0	0	0	NA
Solyc01g015020	PRLI-interacting factor A (Fragment) (AHRD V1 *-*- Q9FUB4_ARATH)	31.42	32.01	51.89	52.92	25.46	30.07	57.65	54.8	25.62	21.68	33	29.58	34.79	36.97	40.46	37.84	55.39	55.5	43.06	42.82	56.35	67.75	63.44	67.06	55.87	49.65	19.26	17.99	ORTHOMCL7166	1	1	1	1	1
Solyc01g015030	Unknown Protein (AHRD V1)	0	0	0	0	0	0	0	0	0	0	0	0	0	0	0	0	0	0	0	0	0	0	0	0	0	0	0	0	ORTHOMCL13935	3	0	0	0	0
Solyc01g015040	Unknown Protein (AHRD V1)	0	0.5	1.14	1.17	1.11	0.57	4.12	3.53	0.68	0	2.49	3.62	10.13	6.79	8.31	6.86	8.52	7.17	6.54	5.89	0	0	0	0	0	0	0	0	NA
Solyc01g015050	Unknown Protein (AHRD V1)	0.3	0.61	0.7	0.72	1.36	2.07	3.59	3.95	2.49	0.42	4.06	3.53	8.25	7.6	4.61	7.23	9.75	7.41	10.12	7.75	0	0	0	0	0	0	0	0	NA
Solyc01g015060	X1 (Fragment) (AHRD V1 *--- Q3T7E5_ZEAMP); contains Interpro domain(s) IPR005380 Region of unknown function XS	0	0	0	0	0	0	0	0	0	0	0	0	0	0	0	0	0	0	0	0	0	0	0	0	0	0	0	0	NA
Solyc01g015070	Unknown Protein (AHRD V1)	11.03	11.51	10	9.5	3.25	6.11	7.68	9.25	6.72	5.89	9.34	5.53	15.18	19.6	11.21	14.02	18.67	13.39	18.05	19.77	0	0	0	0	0	0	0	0	NA
Solyc01g015080	Peroxidase (AHRD V1 ***- D7LZC8_ARALY); contains Interpro domain(s) IPR002016 Haem peroxidase, plant/fungal/bacterial	0	0	0	0	0	0	303.67	291.44	0	0	0	0	0	0	0	0	0	0	0	0	0	0	0	0	0	0	0	0	ORTHOMCL3041	2	1	1	1	2
Solyc01g015090	Gag-Pol polyprotein (AHRD V1 ***- B8YLY4_MEDTR); contains Interpro domain(s) IPR001878 Zinc finger, CCHC-type	0	0	0	0	0	0	0	0	0	0	0	0	0	0	0	0	0	0	0	0	0	0	0	0	0	0	0	0	ORTHOMCL109	35	0	0	4	2
Solyc01g015100	Transposon Ty1-A Gag-Pol polyprotein (AHRD V1 ***- YA11B_YEAST); contains Interpro domain(s) IPR001584 Integrase, catalytic core	0	0	0	0	0	0	0	0	0	0	0	0	0	0	0	0	0	0	0	0	0	0	0	0	0	0	0	0	ORTHOMCL109	35	0	0	4	2
Solyc01g015110	Ulp1 protease family C-terminal catalytic domain containing protein (AHRD V1 *-*- Q60D46_SOLDE)	0.09	0.18	0.52	0.11	0	0	0.11	0	0	0	0	0	0.21	0.1	0.14	0.11	0.1	0	0.24	0	0.14	0.14	0	0	0.1	0	0	0	ORTHOMCL151	34	1	0	0	0
Solyc01g015120	Ulp1 protease family C-terminal catalytic domain containing protein (AHRD V1 *-*- Q60D46_SOLDE)	0	0	0	0	0	0	0	0	0	0	0	0	0	0	0	0	0	0	0	0	0	0	0	0	0	0	0	0	NA
Solyc01g015130	F-box family protein (AHRD V1 ***- D7LS19_ARALY)	0	0	0	0	0	0	0	0	0	0	0	0	0	0	0	0	0	0	0	0	0	0	0	0	0	0	0	0	NA
Solyc01g015140	Cytochrome b (AHRD V1 ***- Q95871_TOBAC); contains Interpro domain(s) IPR016175 Cytochrome b/b6	0	0	0	0.77	0	0	0	0.39	0	0	0	0.48	0.74	0.37	0	0	0.35	0	0	0.6	0	0	0	0.72	0	0	0	0	NA
Solyc01g015150	Polyprotein (AHRD V1 ***- A5JSC4_MAIZE)	0	0	0	0	0	0	0	0	0	0	0	0	0	0	0	0	0	0	0	0	0	0	0	0	0	0	0	0	NA
Solyc01g015160	Unknown Protein (AHRD V1)	0	0	0	0	0	0	0	0	0	0	0	0	0	0	0	0	0	0	0	0	0	0	0	0	0	0	0	0	ORTHOMCL1621	9	0	0	0	0
Solyc01g015170	Unknown Protein (AHRD V1)	0	0	0	0	0	0	0	0	0	0	0	0	0	0	0	0	0	0	0	0	0	0	0	0	0	0	0	0	NA
Solyc01g015180	Unknown Protein (AHRD V1)	0	0	0	0	0	0	0	0	0	0	0	0	0	0	0	0	0	0	0	0	0	0	0	0	0	0	0	0	NA
Solyc01g015190	Unknown Protein (AHRD V1)	0	0	0	0	0	0	0	0	0	0	0	0	0	0	0	0	0	0	0	0	0	0	0	0	0	0	0	0	ORTHOMCL355	20	0	0	0	0
Solyc01g015200	Unknown Protein (AHRD V1)	0	0	0	0	0	0	0	0	0	0	0	0	0	0	0	0	0	0	0	0	0	0	0	0	0	0	0	0	NA
Solyc01g015210	B3 domain-containing protein At1g49475 (AHRD V1 *-*- Y1475_ARATH); contains Interpro domain(s) IPR003340 Transcriptional factor B3	0	0	0	0	0	0	0	0	0	0	0	0	0	0	0	0	0	0	0	0	0	0	0	0	0	0	0	0	NA
Solyc01g015220	Polyprotein (Fragment) (AHRD V1 **-- Q6UTY7_ORYSJ); contains Interpro domain(s) IPR000953 Chromo domain	0	0	0	0	0	0	0	0	0	0	0	0	0	0	0	0	0	0	0	0	0	0	0	0	0	0	0	0	ORTHOMCL6205	5	0	0	0	0
Solyc01g015230	Unknown Protein (AHRD V1)	0	0	0	0	0	0	0	0	0	0	0	0	0	0	0	0	0	0	0	0	0	0	0	0	0	0	0	0	NA
Solyc01g015240	Unknown Protein (AHRD V1)	0	0	0	0	0	0	0	0	0	0	0	0	0	0	0	0	0	0	0	0	0	0	0	0	0	0	0	0	NA
Solyc01g015250	Unknown Protein (AHRD V1)	0	0	0	0	0	0	0	0	0	0	0	0	0	0	0	0	0	0	0	0	0	0	0	0	0	0	0	0	NA
Solyc01g015260	Unknown Protein (AHRD V1)	0	0	0	0	0	0	0	0	0	0	0	0	0	0	0	0	0	0	0	0	0	0	0	0	0	0	0	0	ORTHOMCL20858	2	0	0	0	0
Solyc01g015270	Unknown Protein (AHRD V1)	0	0	0	0	0	0	0	0	0	0	0	0	0	0	0	0	0	0	0	0	0	0	0	0	0	0	0	0	ORTHOMCL11	74	2	0	1	2
Solyc01g015280	Unknown Protein (AHRD V1)	0	0	0	0	0	0	0	0	0	0	0	0	0	0	0	0	0	0	0	0	0	0	0	0	0	0	0	0	NA
Solyc01g015290	Glycine-rich protein 2 (AHRD V1 --*- GRP2_NICSY); contains Interpro domain(s) IPR002059 Cold-shock protein, DNA-binding	0	0	0	0	0	0	0	0	0	0	0	0	0	0	0	0	0	0	0	0	0	0	0	0	0	0	0	0	NA
Solyc01g015300	Unknown Protein (AHRD V1)	0	0	0	0	0	0	0	0	0	0	0	0	0	0	0.77	0	0	0	0	0	0	0	0	0	0	0	0	0	ORTHOMCL20858	2	0	0	0	0
Solyc01g016300	Unknown Protein (AHRD V1)	0	0	0	0	0	0	0	0	0	0	0	0	0	0	0	0	0	0	0	0	0	0	0	0	0	0	0	0	NA
Solyc01g016310	Unknown Protein (AHRD V1)	0	0	0	0	0	0	0	0	0	0	0	0	0	0	0	0	0	0	0	0	0	0	0	0	0	0	0	0	ORTHOMCL355	20	0	0	0	0
Solyc01g016320	Unknown Protein (AHRD V1)	0	0	0	0	0	0	0	0	0	0	0	0	0	0	0	0	0	0	0	0	0	0	0	0	0	0	0	0	NA
Solyc01g016330	Gag-pol polyprotein (AHRD V1 **-- Q69FA4_PHAVU); contains Interpro domain(s) IPR013103 Reverse transcriptase, RNA-dependent DNA polymerase	0	0	0	0	0	0	0	0	0	0	0	0	0	0	0	0	0	0	0	0	0	0	0	0	0	0	0	0	ORTHOMCL74	11	1	0	0	36
Solyc01g016340	Gag-pol polyprotein (AHRD V1 **-- Q69FA4_PHAVU); contains Interpro domain(s) IPR013103 Reverse transcriptase, RNA-dependent DNA polymerase	0	0	0	0	0	0	0	0	0	0	0	0	0	0	0	0	0	0	0	0	0	0	0	0	0	0	0	0	NA
Solyc01g016350	Unknown Protein (AHRD V1)	0	0	0	0	0	0	0	0	0	0	0	0	0	0	0	0	0	0	0	0	0	0	0	0	0	0	0	0	NA
Solyc01g016360	LRR receptor-like serine/threonine-protein kinase, RLP	0.56	0.57	0.86	0.45	0.42	1.29	0.89	0.22	0	0	0	0	0	0	0	0.24	0.2	0	0	0	1.16	1.48	5.87	7.08	2.57	0.24	1.04	0.81	NA
Solyc01g016370	LRR receptor-like serine/threonine-protein kinase, RLP	0.53	0.38	0.33	0.24	0.32	0.71	0.88	0.78	0	0.06	0.07	0.06	0.05	0.05	0.25	0.47	0.13	0.09	0.36	0.26	0.76	0.39	1.5	1.97	0.85	0.27	0	0	ORTHOMCL14	23	47	0	8	0
Solyc01g016380	Os06g0207500 protein (Fragment) (AHRD V1 ***- Q0DDQ9_ORYSJ); contains Interpro domain(s) IPR004253 Protein of unknown function DUF231, plant	3.71	3.34	0.67	0.61	0.07	0	0	0.15	0.09	0	0	0	0	0	0	0	0	0	0	0	0	0	0	0	0	0	0	0	ORTHOMCL20857	1	1	0	0	0
Solyc01g016390	Os06g0207500 protein (Fragment) (AHRD V1 *-*- Q0DDQ9_ORYSJ)	1.88	2.71	0.34	0.17	0	0	0.12	0.06	0	0	0	0	0	0	0	0	0	0	0	0	0.07	0	0	0	0	0	0	0	ORTHOMCL20856	1	1	0	0	0
Solyc01g016400	Unknown Protein (AHRD V1)	0.7	0	0.41	1.68	0.8	0.41	0	0.84	0	0	0	0.52	0	0	0.54	0.45	1.14	0.39	1.56	0.97	10.37	10.09	25.25	22.82	23.87	30.66	0.98	0	NA
Solyc01g016410	RING finger protein 43 (AHRD V1 *-*- RNF43_HUMAN); contains Interpro domain(s) IPR011016 Zinc finger, RING-CH-type	6.05	5.2	6.12	4.83	3.88	3.44	8.74	7.36	8.87	8.63	6.53	7.76	10.67	10.73	16.35	18.07	25.03	26.03	24.34	24.48	20.03	21.71	24.76	20.83	28.29	28.8	0.49	2.8	ORTHOMCL20855	1	1	0	0	0
Solyc01g016430	Unknown Protein (AHRD V1)	0	0	0	0	0	0	0	0	0	0	0	0	0	0	0	0	0	0	0	0	0	0	0	0	0	0	0	0	NA
Solyc01g016450	Unknown Protein (AHRD V1)	0	0	0	0	0	0	0	0	0	0	0	0	0	0	0	0	0	0	0	0	0	0	0	0	0	0	0	0	NA
Solyc01g016460	Unknown Protein (AHRD V1)	23.66	15.01	20.2	16.48	20.71	14.87	17.97	18.31	12.04	13.04	19.27	18.55	15.46	15.9	21.68	17.13	6.82	8.75	5.33	8.03	22.33	18.65	19.43	17.11	14.49	8.58	17.96	25.17	NA
Solyc01g016470	Unknown Protein (AHRD V1); contains Interpro domain(s) IPR001813 Ribosomal protein 60S	41.86	42.82	37.86	33.69	17.81	19.88	60.81	64.94	80.49	77.36	69.38	57.65	32.88	34.1	44.73	42.99	32.6	33.06	38.23	40.08	14.06	14.85	15.21	14.64	13.9	12.12	50.32	67.04	NA
Solyc01g016480	Ulp1 protease family C-terminal catalytic domain containing protein (AHRD V1 *-*- Q60D46_SOLDE)	0.05	0	0	0	0	0	0	0	0	0	0	0	0	0	0	0	0	0	0	0.09	0	0	0	0	0.06	0	0	0.07	ORTHOMCL150	35	0	0	0	0
Solyc01g016510	AT4g03420/F9H3_4 (AHRD V1 ***- Q8S9K9_ARATH); contains Interpro domain(s) IPR008507 Protein of unknown function DUF789	0	0	0	0	0	0	0	0	0	0	0	0	0	0	0	0	0	0	0	0	0	0	0	0	0	0	0	0	ORTHOMCL20854	1	1	0	0	0
Solyc01g016520	DNA-directed RNA polymerase subunit beta&apos&apos (AHRD V1 ***- D4PBA1_PHODC)	0	0	0	0	0	0	0	0	0	0	0	0	0	0	0	0	0	0	0	0.53	0	0	0	0	0	0	0	0	NA
Solyc01g016530	Unknown Protein (AHRD V1); contains Interpro domain(s) IPR008507 Protein of unknown function DUF789	0	0	0	0	0	0	0	0	0	0	0	0	0	0	0	0	0	0	0	0	0	0	0	0	0	0	0	0	NA
Solyc01g016540	Os08g0100600 protein (Fragment) (AHRD V1 *-*- Q0J8P7_ORYSJ); contains Interpro domain(s) IPR008507 Protein of unknown function DUF789	0.2	0	0.23	0	0.23	0.23	0	0	0	0	0	0	0	0	0	0	0	0	0	0	0	0	0	0	0	0	0	0	ORTHOMCL20853	1	1	0	0	0
Solyc01g016550	Unknown Protein (AHRD V1)	0	0	0	0	0	0	0	0	0	0	0	0	0	0	0	0	0	0	0	0	0	0	0	0	0	0	0	0	NA
Solyc01g016560	Unknown Protein (AHRD V1)	0	0.7	0	0	0	0.53	0	0	0	0	0	0	0	0.26	0	0	0	0.26	0	0	0	0	0	0	0	0	0	0	NA
Solyc01g016570	Pol polyprotein (AHRD V1 ***- Q9ZT24_MAIZE); contains Interpro domain(s) IPR013103 Reverse transcriptase, RNA-dependent DNA polymerase	1.35	0.46	0.7	0.9	0.68	1.39	1.99	2.17	1.46	1.06	3.57	2.66	2.76	2.43	2.78	2.3	1.96	0.85	1.87	1.53	0	0	0	0	0	0	0	0	ORTHOMCL422	18	0	0	0	0
Solyc01g016580	Unknown Protein (AHRD V1)	0	0	0	0	0	0	0	0	0	0	0	0	0	0	0	0	0	0	0	0	0	0	0	0	0	0	0	0	NA
Solyc01g016590	Unknown Protein (AHRD V1)	0	0	0	0	0	0	0	0	0	0	0	0	0	0	0	0	0	0	0	0	0	0	0	0	0	0	0	0	ORTHOMCL20852	2	0	0	0	0
Solyc01g016600	Unknown Protein (AHRD V1); contains Interpro domain(s) IPR007749 Protein of unknown function DUF677	0	0	0	0	0	0	0	0	0	0	0	0	0	0	0	0	0	0	0	0	0	0	0	0	0	0	0	0	NA
Solyc01g016610	Branched-chain alpha keto-acid dehydrogenase E1 alpha subunit (Fragment) (AHRD V1 ***- Q9ZT57_ARATH)	0	0	0	0	0	0	0	0	0	0	0	0	0	0	0	0	0	0	0	0	0	0	0	0	0	0	0	0	NA
Solyc01g016620	Unknown Protein (AHRD V1)	0	0	0	0	0	0	0	0	0	0	0	0	0	0	0	0	0	0	0	0	0	0	0	0	0	0	0	0	ORTHOMCL20851	2	0	0	0	0
Solyc01g016630	Unknown Protein (AHRD V1)	0	0	0	0	0	0	0	0	0	0	0	0	0	0	0	0	0	0	0	0	0	0	0	0	0	0	0	0	ORTHOMCL20851	2	0	0	0	0
Solyc01g016640	1-aminocyclopropane-1-carboxylate oxidase homolog (AHRD V1 *--- ACCH3_SOLLC); contains Interpro domain(s) IPR005123 Oxoglutarate and iron-dependent oxygenase	0	0	0	0	0	0	0	0	0	0	0	0	0	0	0	0	0	0	0	0	0	0	0	0	0	0	0	0	ORTHOMCL6204	5	0	0	0	0
Solyc01g016650	Unknown Protein (AHRD V1)	0.33	0.33	0	0	0	0	0	0	0	0	0	0	0	0	0	0	0	0	0	0	0	0	0	0	0	0	0	0	NA
Solyc01g016660	Granule-bound starch synthase 2, chloroplastic/amyloplastic (AHRD V1 -**- SSY2_SOLTU)	0	0	0	0	0	0	0	0	0	0	0	0	0	0	0	0	0	0	0	0	0	0	0	0	0	0	0	0	ORTHOMCL13934	3	0	0	0	0
Solyc01g016670	Unknown Protein (AHRD V1)	0	0	0	0	0	0	0	0	0	0	0	0	0	0	0	0	0	0	0	0	0	0	0	0	0	0	0	0	NA
Solyc01g016680	1-aminocyclopropane-1-carboxylate oxidase homolog 1 (AHRD V1 ***- ACCH1_ARATH); contains Interpro domain(s) IPR005123 Oxoglutarate and iron-dependent oxygenase	0	0	0	0	0	0	0	0	0	0	0	0	0	0	0	0	0	0	0	0	0	0	0	0	0	0	0	0	ORTHOMCL6204	5	0	0	0	0
Solyc01g016690	Unknown Protein (AHRD V1)	0	0	0.34	0	0	0	0	0	0	0	0	0	0	0	0	0	0	0	0	0	0	0	0	0	0	0	0	0	ORTHOMCL13933	3	0	0	0	0
Solyc01g016700	Unknown Protein (AHRD V1)	0.91	0	0	0	0	0	0	0	0	0	0.77	2.02	0	0	0.7	0	0	0.51	0.41	1.27	0.71	0	0	0	0.53	1.78	0	0	NA
Solyc01g016710	Polyprotein (Fragment) (AHRD V1 ***- Q29SA7_9VIRU); contains Interpro domain(s) IPR000477 RNA-directed DNA polymerase (reverse transcriptase)	0	0	0	0	0	0	0	0	0	0	0	0	0	0	0	0	0	0	0	0	0	0	0	0	0	0	0	0	ORTHOMCL214	4	22	0	1	0
Solyc01g016720	Unknown Protein (AHRD V1)	0.92	1.25	0.71	1.46	0	0	0	0	0.42	0	0	0.9	0	0	0.94	0	0	0	0.27	0	0	0	0	0	0	0	0	0	NA
Solyc01g016730	Unknown Protein (AHRD V1)	0	0	0	0	0	0	0	0	0	0	0	0	0	0	0	0	0	0	0	0	0	0	0	0	0	0	0	0	NA
Solyc01g016740	Helicase-like protein (AHRD V1 ***- Q6H6L6_ORYSJ); contains Interpro domain(s) IPR010285 Protein of unknown function DUF889, eukaryote	0	0	0	0	0	0	0	0	0	0	0	0	0	0	0	0	0	0	0	0	0	0	0	0	0	0	0	0	NA
Solyc01g016750	Helicase-like protein (AHRD V1 *-*- Q9AYF0_ORYSJ)	0	0	0	0	0	0	0	0	0	0	0	0	0	0	0	0	0	0	0	0	0	0	0	0	0	0	0	0	NA
Solyc01g016760	Unknown Protein (AHRD V1)	0	0	0	0	0	0	0	0	0	0	0	0	0	0	0	0	0	0	0	0	0	0	0	0	0	0	0	0	NA
Solyc01g016770	Myb-related transcription factor (AHRD V1 ***- Q40173_SOLLC); contains Interpro domain(s) IPR015495 Myb transcription factor	0	0	0	0	0	0	0	0	0	0	0	0	0	0	0	0	0	0	0	0	0	0	0	0	0	0	0	0	NA
Solyc01g016780	Unknown Protein (AHRD V1)	0	0	0	0	0	0	0	0	0	0	0	0	0	0	0	0	0	0	0	0	0	0	0	0	0	0	0	0	NA
Solyc01g016790	Unknown Protein (AHRD V1)	0	0	0	0	0	0	0	0	0	0	0	0	0	0	0	0	0	0	0	0	0	0	0	0	0	0	0	0	NA
Solyc01g016800	Unknown Protein (AHRD V1)	0	0	0	0	0	0	0	0	0	0	0	0	0	0	0	0	0	0	0	0	0	0	0	0	0	0	0	0	NA
Solyc01g016810	Unknown Protein (AHRD V1)	0	0	0	0	0	0	0	0	0	0	0	0	0	0	0	0	0	0	0	0	0	0	1.08	0.69	0.71	0	0	0	NA
Solyc01g016820	Unknown Protein (AHRD V1)	0.13	0	0	0	0	0	0	0	0	0	0	0	0	0	0	0	0	0	0	0	0.2	0	0	0	0	0	0	0	ORTHOMCL20850	2	0	0	0	0
Solyc01g016830	Unknown Protein (AHRD V1)	0	0	0	0	0	0	0	0	0	0	0	0	0	0	0	0	0	0	0	0	0	0	0	0	0	0	0	0	NA
Solyc01g016840	Unknown Protein (AHRD V1)	0	0	0	0	0	0	0	0	0	0	0	0	0	0	0	0	0	0	0	0	0	0	0	0	0	0	0	0	NA
Solyc01g016850	Unknown Protein (AHRD V1)	0	0	0	0	0	0	0	0	0	0	0	0	0	0	0	0	0	0	0	0	0	0	0	0	0	0	0	0	NA
Solyc01g016860	Transposase family tnp2 protein (AHRD V1 *--- Q6ATT2_ORYSJ)	0	0	0	0	0	0	0	0	0	0	0	0	0	0	0	0	0	0	0	0	0	0	0	0	0	0	0	0	ORTHOMCL11	74	2	0	1	2
Solyc01g016870	Unknown Protein (AHRD V1)	0	0	0	0	0	0	0	0	0	0	0	0	0	0	0	0	0	0	0	0	0	0	0	0	0	0	0	0	NA
Solyc01g016880	Unknown Protein (AHRD V1)	0	0	0	0	0	0	0	0	0	0	0	0	0	0	0	0	0	0	0	0	0	0	0	0	0	0	0	0	ORTHOMCL13932	3	0	0	0	0
Solyc01g016890	Unknown Protein (AHRD V1)	0	0	0	0	0	0	0	0	0	0	0	0	0	0	0	0	0	0	0	0	0	0	0	0	0	0	0	0	NA
Solyc01g016900	Vacuolar protein sorting-associated protein 33 homolog (AHRD V1 ***- VPS33_ARATH); contains Interpro domain(s) IPR001619 Sec1-like protein	0	0	0	0	0	0	0	0	0	0	0	0	0	0	0	0	0	0	0	0	0	0	0	0	0	0	0	0	NA
Solyc01g016910	Unknown Protein (AHRD V1)	0	0	0	0	0	0	0	0	0	0	0	0	0	0	0	0	0	0	0	0	0	0	0	0	0	0	0	0	ORTHOMCL13932	3	0	0	0	0
Solyc01g016920	Unknown Protein (AHRD V1); contains Interpro domain(s) IPR003034 DNA-binding SAP	0	0	0	0	0	0	0	0	0	0	0	0	0	0	0	0	0	0	0	0	0	0	0	0	0	0	0	0	NA
Solyc01g016930	Unknown Protein (AHRD V1); contains Interpro domain(s) IPR003034 DNA-binding SAP	0	0	0	0	0	0	0	0	0	0	0	0	0	0	0	0	0	0	0	0	0	0	0	0	0	0	0	0	NA
Solyc01g016940	Unknown Protein (AHRD V1)	0	0	0	0	0	0	0	0	0	0	0	0	0	0	0	0	0	0	0	0	0	0	0	0	0	0	0	0	ORTHOMCL13932	3	0	0	0	0
Solyc01g016950	Transposon Ty1-PL Gag-Pol polyprotein (AHRD V1 ***- YP11B_YEAST); contains Interpro domain(s) IPR001584 Integrase, catalytic core	0	0	0	0	0	0	0	0	0	0	0	0	0	0	0	0	0	0	0	0	0	0	0	0	0	0	0	0	ORTHOMCL74	11	1	0	0	36
Solyc01g016960	Nbs, resistance protein fragment	0	0	0	0	0	0	0	0	0	0	0	0	0	0	0	0	0	0	0	0.16	0	0	0	0	0	0	0	0	NA
Solyc01g016970	Unknown Protein (AHRD V1)	0.22	0	0	0.26	0	0	0	0.26	0	0	0	0	0	0	0	0.84	0.48	0	0.98	0.41	1.03	0.7	0.39	0.25	0	0.57	0	0	ORTHOMCL20849	2	0	0	0	0
Solyc01g016980	Unknown Protein (AHRD V1)	0	0	0	0	0	0	0	0	0	0	0	0	0	0	0	0	0	0	0	0	0	0	0	0	0	0	0	0	NA
Solyc01g016990	Unknown Protein (AHRD V1)	0	0	0	0	0	0	0	0	0	0	0	0	0	0	0	0	0	0	0	0	0	0	0	0	0	0	0	0	NA
Solyc01g017000	Unknown Protein (AHRD V1)	0	0	0	0	0	0	0	0	0	0	0	0	0	0	0	0	0	0	0	0	0	0	0	0	0	0	0	0	NA
Solyc01g017010	Unknown Protein (AHRD V1)	0	0	0	0	0	0	0	0	0	0	0	0	0	0	0	0	0	0	0	0	0	0	0	0	0	0	0	0	NA
Solyc01g017020	Unknown Protein (AHRD V1)	0	0	0	0	0	0	0	0	0	0	0	0	0	0	0	0	0	0	0	0	0	0	0	0	0	0	0	0	NA
Solyc01g017030	ARID/BRIGHT DNA-binding domain-containing protein (AHRD V1 ***- D7KTU4_ARALY); contains Interpro domain(s) IPR008978 HSP20-like chaperone	0	0	0	0	0	0	0	0	0	0	0	0	0	0	0	0.23	0	0	0	0	0	0	0	0	0	0	0	0	ORTHOMCL20848	2	0	0	0	0
Solyc01g017040	Unknown Protein (AHRD V1)	0	0	0	0	0	0	0	0	0	0	0	0	0	0	0	0	0	0	0	0	0	0	0	0	0	0	0	0	NA
Solyc01g017050	PG1 protein (Fragment) (AHRD V1 --*- D0EZ76_BACAM)	0	0	0	0	0	0	0	0	0	0	0	0	0	0	0	0	0	0	0	0	0	0	0	0	0	0	0	0	ORTHOMCL14995	1	1	0	1	0
Solyc01g017060	Ycf2 (AHRD V1 ***- D2KLP5_OLEEU); contains Interpro domain(s) IPR008543 Chloroplast Ycf2	0	0.13	0	0	0	0	0	0	0	0	0.21	0	0	0.14	0	0	0	0	0.11	0.23	0	0	0	0	0	0	0	0	ORTHOMCL20847	2	0	0	0	0
Solyc01g017070	Ycf2 (AHRD V1 *-*- A6Y9W3_9MAGN); contains Interpro domain(s) IPR008543 Chloroplast Ycf2	0	0	0	0	0	0	0	0	0	0	0.48	0	0	0.33	0	0	0	0	0	0	0	0	0	0	0	0	0	0	NA
Solyc01g017080	Ycf2 (AHRD V1 *-*- A6YA57_9MAGN); contains Interpro domain(s) IPR019645 Protein precursor Ycf15, putative, chloroplast	0	0	0	0	0	0	0	0	0	0	0	0	0	0	0	0	0	0	0	0.11	0	0	0	0	0	0	0	0	NA
Solyc01g017090	NADH-quinone oxidoreductase subunit L (AHRD V1 *-*- NUOL_NEIMA); contains Interpro domain(s) IPR018393 NADH-plastoquinone oxidoreductase, chain 5 subgroup	0.13	0.65	0.15	0	0.14	0.15	0	0.61	0	0	0.65	0.75	0	0.44	0	0.16	0	0	0	0.24	0.2	0	0	0	0	0	0	0	NA
Solyc01g017100	NADH-quinone oxidoreductase subunit L (AHRD V1 ***- NUOL_RHOCA); contains Interpro domain(s) IPR001750 NADH:ubiquinone/plastoquinone oxidoreductase	0	0	0.27	0.28	0	0	0	0	0	0	0.39	0	0.27	0	0.36	0	0	0.26	0.21	0.21	0	0	0	0	0	0.3	0	0	NA
Solyc01g017110	NADH dehydrogenase subunit 5 (Fragment) (AHRD V1 *-*- C4PB69_SOLPN); contains Interpro domain(s) IPR008543 Chloroplast Ycf2	0.07	0.3	0	0	0	0.08	0	0	0	0	0	0.22	0	0	0	0	0	0.16	0	0	0	0.12	0.13	0.08	0	0	0	0	NA
Solyc01g017120	Ycf2 (AHRD V1 ***- A6Y9Y0_HEUMI); contains Interpro domain(s) IPR008543 Chloroplast Ycf2	0	0	0	0	0	0	0	0	0	0	0	0	0	0	0	0	0	0	0	0	0	0	0	0	0	0	0	0	NA
Solyc01g017130	Ycf2 (AHRD V1 ***- D2SXY2_9MAGN)	0	0	0	0	0	0	0.44	0	0	0	0	0	0	0.85	0	0.47	0	0	0	0	0.57	0	0	0	0	0	0	0	NA
Solyc01g017140	Ycf2 (AHRD V1 ***- A6YA48_9MAGN)	0	0	0	0.2	0	0	0	0	0.12	0	0	0	0.29	0	0	0	0	0	0	0	0.13	0	0	0	0	0	0	0	NA
Solyc01g017150	Ycf15 (AHRD V1 ***- D2KLP6_OLEEU); contains Interpro domain(s) IPR019645 Protein precursor Ycf15, putative, chloroplast	0	0	0	0	0	0	0	0	0	0	0	0	0	0	0	0	0	0	0	0	0	0	0	0	0	0	0	0	NA
Solyc01g017160	NAD(P)H-quinone oxidoreductase subunit 2 chloroplastic (AHRD V1 ***- Q0PUW8_PRUPE)	0	0	0	0	0	0	0	0	0	0	0	0	0	0	0	0	0	0	0	0	0	0	0	0	0	0	0	0	ORTHOMCL20846	2	0	0	0	0
Solyc01g017170	NAD(P)H-quinone oxidoreductase subunit 2 chloroplastic (AHRD V1 ***- A0ART9_AGAAF); contains Interpro domain(s) IPR001750 NADH:ubiquinone/plastoquinone oxidoreductase	0.41	0.21	0.72	0.49	1.4	0.71	0	0.49	0.29	0.29	1.75	1.22	2.6	1.9	0.64	0.52	1.12	0.46	2.02	1.91	0.96	0.66	0.72	0.69	0.71	0.81	3.45	1.79	NA
Solyc01g017180	NAD(P)H-quinone oxidoreductase subunit 2 chloroplastic (AHRD V1 ***- C7BFB5_DENLA); contains Interpro domain(s) IPR001750 NADH:ubiquinone/plastoquinone oxidoreductase	0	0	0	0	0	0	0	0	0	0	0	0	0	0	0	0	0	0	0	0	0	0	0	0	0	0	0	0	NA
Solyc01g017190	NAD(P)H-quinone oxidoreductase subunit 2 chloroplastic (AHRD V1 ***- A6YA00_KALDA); contains Interpro domain(s) IPR000235 Ribosomal protein S7	0	0	0	0	0	0	0	0	0	0	0	0	0	0	0	0.33	0	0	0	0	0	0	0	0	0	0	0	0	NA
Solyc01g017200	Acetyl-coenzyme A carboxylase carboxyl transferase subunit beta (AHRD V1 *-*- ACCD_EPIVI)	0	0	0	0	0	0	0	0	0	0	0	0	0.29	0	0	0	0	0	0.22	0	0	0	0	0	0	0	0	0	NA
Solyc01g017210	NAD(P)H-quinone oxidoreductase subunit 3 (AHRD V1 ***- D3WEI8_LIQST); contains Interpro domain(s) IPR000440 NADH:ubiquinone/plastoquinone oxidoreductase, chain 3	0	0	0	0	0	0	0	0	0	0	0	0	0	0	0	0	0	0	0	0	0	0	0	0	0	0	0	0	NA
Solyc01g017220	ATP synthase epsilon chain chloroplastic (AHRD V1 ***- D3WDX2_9ROSA); contains Interpro domain(s) IPR001469 ATPase, F1 complex, delta/epsilon subunit	4.69	1.8	11.26	9.83	44.55	45.71	5.28	7.03	18.7	18.54	63.07	51.9	83.44	83.62	32.08	29.09	15.28	16.15	11.22	13.55	35.09	43.08	34.45	45.01	14.19	19.11	195.56	233.38	NA
Solyc01g017230	NADH dehydrogenase subunit (Fragment) (AHRD V1 ***- B7SRE2_9SOLA); contains Interpro domain(s) IPR002128 NADH:ubiquinone/plastoquinone oxidoreductase, chloroplast chain 5, C-terminal	0	0.14	0	0	0	0	0	0	0	0	0	0	0.16	0	0	0	0	0.15	0	0	0.21	0	0.24	0	0	0	0	0	NA
Solyc01g017240	Ycf1 (Fragment) (AHRD V1 ***- A6Y9X6_HAMJA); contains Interpro domain(s) IPR008896 Ycf1	0	0	0	0	0	0	0	0	0	0	0	0.35	0	0	0.37	0	0	0	0	0	0	0	0	0	0	0	0	0	NA
Solyc01g017250	Ycf1 (AHRD V1 *--- D2KLR1_OLEEU); contains Interpro domain(s) IPR008896 Ycf1	0	0	0	0	0	0	0	0	0	0	0	0	0.28	0	0	0.31	0	0	0	0	0.38	0.78	0	0.27	0.56	0	0	0	NA
Solyc01g017260	NAD(P)H-quinone oxidoreductase subunit 2 chloroplastic (AHRD V1 ***- D3WBN8_LONJA); contains Interpro domain(s) IPR001750 NADH:ubiquinone/plastoquinone oxidoreductase	0	0	0	0	0	0	0	0	0	0	0	0	0	0	0	0	0	0	0	0	0	0	0	0	0	0	0	0	ORTHOMCL20845	2	0	0	0	0
Solyc01g017270	Ycf15 (AHRD V1 ***- A6YA40_9MAGN); contains Interpro domain(s) IPR019645 Protein precursor Ycf15, putative, chloroplast	0	0	0	0	0	0	0	0	0	0	0	0	0	0	0	0	0.49	0	0	0	0	0	0	0	0	0	0	0	NA
Solyc01g017280	Ycf2 (AHRD V1 ***- C0LEB7_9ROSI)	0	0	0	0	0	0	0	0	0	0	0	0	0	0	0	0	0	0	0	0	0	0	0	0	0	0	0	0	NA
Solyc01g017290	Ycf2 (AHRD V1 ***- A6YA16_9MAGN)	0	0	0	0	0	0	0	0	0	0	0	0	0	0	0	0	0	0	0	0	0	0	0	0	0	0	0	0	NA
Solyc01g017300	Photosystem I P700 chlorophyll a apoprotein A1 (AHRD V1 *-*- D4PBB1_PHODC); contains Interpro domain(s) IPR001280 Photosystem I psaA and psaB	0.2	0.1	0.12	0.24	0.23	0	0	0	0.14	0.14	1.04	1.05	1.17	0.47	0	0.13	0	0	0.09	0.09	0	0	0	0.23	0	0	0.28	0	ORTHOMCL1076	7	2	0	2	0
Solyc01g017310	Photosystem I P700 chlorophyll a apoprotein A1 (AHRD V1 ***- B7T350_9ROSI); contains Interpro domain(s) IPR001280 Photosystem I psaA and psaB	0	0	0	0	0	0	0	0	0	0	0	0	0	0	0	0	0	0	0	0	0	0	0	0	0	0	0	0	NA
Solyc01g017320	Photosystem I P700 chlorophyll a apoprotein A1 (AHRD V1 ***- D3WBY3_9MAGN); contains Interpro domain(s) IPR001280 Photosystem I psaA and psaB	0.41	0	0	0	0	0.48	0.49	0	0	0	0	0	0.47	0.48	0	0	0	0	0.37	0	0	0	0	0	0	0	0	0	NA
Solyc01g017330	Photosystem I P700 chlorophyll a apoprotein A1 (AHRD V1 ***- D3WCE1_NEROL); contains Interpro domain(s) IPR001280 Photosystem I psaA and psaB	0.82	0.21	0.48	0.49	2.09	0.71	0	0.25	0.57	0.29	4.16	4.53	2.35	2.6	0	0.26	0	0	0.36	0.19	1.27	0.33	0	0.46	0	0.27	0.29	0	NA
Solyc01g017340	Cytochrome c biogenesis protein ccsA (AHRD V1 *-*- D8FZF0_9CYAN); contains Interpro domain(s) IPR002541 Cytochrome c assembly protein	0.24	0.5	0.28	0	0.55	0.42	0	0.29	0	0	0	0.18	0.28	0.28	0	0	0	0	0	0.11	0	0	0	0.27	0	0	0.17	0.71	NA
Solyc01g017350	DNA-directed RNA polymerase subunit beta&apos&apos (AHRD V1 ***- A9XW65_CORFO)	0.19	0.79	0.23	0	0	0	0	0	0	0.27	0.33	0	0	0	0	0	0	0	0	0	0	0	0.34	0.22	0	0.25	0	0	NA
Solyc01g017360	DNA-directed RNA polymerase subunit beta (AHRD V1 ***- D3WBC8_9BORA); contains Interpro domain(s) IPR015712 DNA-directed RNA polymerase, subunit 2	0.3	0.31	0	0	0	0	0	0	0	0	0.51	0.45	0	0	0	0	0	0	0.27	0	0	0	0	0	0	0	0	0	NA
Solyc01g017370	DNA-directed RNA polymerase subunit beta&apos; (AHRD V1 ***- RPOC1_SOLLC); contains Interpro domain(s) IPR007080 RNA polymerase Rpb1, domain 1	0.17	0	0	0	0.39	0	0.41	0.21	0	0	0.29	0.25	0	0.2	0	0	0.19	0	0.61	0.32	0	0.27	0.3	0	0	0	0	0	ORTHOMCL11243	2	2	0	0	0
Solyc01g017380	DNA-directed RNA polymerase subunit beta&apos; (AHRD V1 ***- RPOC1_LEMMI); contains Interpro domain(s) IPR007080 RNA polymerase Rpb1, domain 1	0	0	0	0	0	0	0	0	0	0.46	0	0	1.14	0.76	0	0.42	0	0	0	0	0.51	0	0.58	0	0	0	0	0	NA
Solyc01g017390	DNA-directed RNA polymerase subunit beta&apos; (AHRD V1 ***- RPOC1_SOYBN); contains Interpro domain(s) IPR000722 RNA polymerase, alpha subunit	0	0	0	0	0	0	0	0	0	0	0	0	0	0	0	0	0	0	0	0	0	0	0	0.51	0	0	0	0	NA
Solyc01g017400	30S ribosomal protein S7 chloroplastic (AHRD V1 ***- D3WCI5_NEROL); contains Interpro domain(s) IPR000235 Ribosomal protein S7	0.26	0.67	1.06	0.16	1.78	1.66	0	0.16	0.18	0.55	1.33	1.15	1.05	0.9	0.4	0.17	0.57	0.15	1.04	1.69	0.41	0.63	0.46	0.58	0.3	0	3.28	0.57	NA
Solyc01g017410	Ycf2 (AHRD V1 ***- D2KLP5_OLEEU); contains Interpro domain(s) IPR008543 Chloroplast Ycf2	0	0	0	0	0	0	0	0	0	0	0	0	0.2	0	0	0	0	0	0	0	0	0	0	0	0.2	0	0	0	NA
Solyc01g017420	DNA-directed RNA polymerase subunit beta&apos&apos (AHRD V1 ***- D2KLS8_OLEEU); contains Interpro domain(s) IPR001268 NADH:ubiquinone oxidoreductase, 30 kDa subunit	0	0	0	0	0.07	0	0.07	0	0.08	0.08	0.1	0	0.27	0.14	0.09	0	0	0	0.1	0	0.18	0	0	0	0.14	0.08	0	0	ORTHOMCL2119	2	3	0	2	1
Solyc01g017430	Cytochrome b6-f complex subunit 4 (AHRD V1 ***- D5FHB7_PHODC); contains Interpro domain(s) IPR005870 Cytochrome b6/f complex, subunit IV	0	0	0	0	0	0	0	0	0	0	0	0	0	0	0	0	0	0	0	0	0	0	0	0	0	0	0	0	NA
Solyc01g017440	DNA-directed RNA polymerase subunit alpha (AHRD V1 ***- D3WAW9_AUCJA); contains Interpro domain(s) IPR011262 DNA-directed RNA polymerase, insert	0	0	0	0	0	0	0	0.17	0	0	0	0	0.16	0	0	0	0	0	0	0.13	0	0	0	0	0.16	0	0	0	NA
Solyc01g017450	30S ribosomal protein S11 chloroplastic (AHRD V1 ***- B5AH31_9ROSI); contains Interpro domain(s) IPR001971 Ribosomal protein S11	0	0	0	0	0	0	0	0	0	0	0	0	0	0	0	0	0	0	0	0	0	0	0	0	0	0	0	0	NA
Solyc01g017460	DNA-directed RNA polymerase subunit beta&apos; (AHRD V1 ***- RPOC1_FAGEA); contains Interpro domain(s) IPR000722 RNA polymerase, alpha subunit	1.09	0	0	0	0	0.63	0	0.66	0	0	2.78	1.61	0.63	1.89	0	0	0	0	0.49	0.51	1.7	0.87	0.96	0.61	1.26	0	0	0	NA
Solyc01g017470	DNA-directed RNA polymerase subunit beta&apos; (AHRD V1 ***- RPOC1_SOLLC); contains Interpro domain(s) IPR000722 RNA polymerase, alpha subunit	0.2	0.2	0	0	0.23	0	0.24	0	0	0	0.34	1.18	0	0	0	0	0.22	0	0	0	0	0	0.35	0	0	0	0	0	NA
Solyc01g017480	Ycf1 (Fragment) (AHRD V1 ***- A6YA12_LIQST); contains Interpro domain(s) IPR008896 Ycf1	0	0	0	0	0	0	0	0	0	0	0	0	0	0	0	0	0	0	0	0	0	0	0	0	0	0	0	0	NA
Solyc01g017490	Conserved protein (AHRD V1 ***- C7TG00_LACRL)	0	0	0	0	0	0	0	0	0	0	0	0	0	0	0	0	0	0	0	0	0	0	0	0	0	0	0	0	NA
Solyc01g017500	Unknown Protein (AHRD V1)	0	0	0	0	0	0	0	0	0	0	0	0	0	0	0	0	0	0	0	0	0	0	0	0	0	0	0	0	ORTHOMCL11407	3	0	0	1	0
Solyc01g017510	DNA-directed RNA polymerase subunit beta&apos&apos (AHRD V1 ***- D3WAP3_ANTMA)	0	0	0.11	0	0	0	0.11	0	0	0	0	0.14	0	0	0	0	0	0	0.09	0.09	0	0.15	0	0.11	0	0	0	0	NA
Solyc01g017520	ATP synthase subunit a chloroplastic (AHRD V1 *-*- D3WBN1_LONJA)	0.34	0	0	0	0.39	0	0	0	0	0	0	0	0	0	0.53	0	0	0	0	0	0	0	0	0	0	0	0	0	NA
Solyc01g017530	30S ribosomal protein S2 (AHRD V1 ***- RS2_NOSP7); contains Interpro domain(s) IPR005706 Ribosomal protein S2, bacterial-type	0	0	0.33	0.17	0	0.16	0	0	0	0.4	0.24	0.42	0	0.33	0	0	0	0.16	0	0.26	0.22	0.45	0.5	0.48	0.33	0	0	0	ORTHOMCL14808	1	1	0	1	0
Solyc01g017540	Dirigent-like protein 1 (AHRD V1 ***- D2DMN2_GOSHI); contains Interpro domain(s) IPR004265 Plant disease resistance response protein	0	0	0	0	0.34	0.34	1.42	0.36	0	0	0	0	0	0	0	0	0	0	0	0	0	0	0	0	0	0	0	0	NA
Solyc01g017550	Unknown Protein (AHRD V1)	0	0.11	0.13	0	0	0	0	0	0	0	0	0	0	0	0	0.14	0.12	0	0	0	0	0	0	0	0	0	0	0	ORTHOMCL20844	1	1	0	0	0
Solyc01g017560	Unknown Protein (AHRD V1)	0.4	0	0	0.48	0	0.23	0	0	0	0	0	0.29	0	0	0	0	0	0	0	0	0	0	0	0	0	0	0	0	NA
Solyc01g017570	Unknown Protein (AHRD V1)	0	0	0	0	0	0	0	0	0	0	0	0	0	0	0	0	0	0	0	0	0	0	0.72	0	0.47	0.54	0	0	NA
Solyc01g017580	Unknown Protein (AHRD V1)	0	0	0	0	0	0	0	0	0	0	0	0	0	0	0	0	0	0	0	0	0	0	0	0	0	0	0	0	NA
Solyc01g017590	Unknown Protein (AHRD V1)	3.88	2.65	1.5	3.1	2.93	1.49	3.1	3.1	1.79	0	2.19	1.91	1.48	0	0	1.64	0	0	0	1.2	0	0	0	0	0	0	0	0	NA
Solyc01g017600	Plant viral-response family protein (AHRD V1 **-- B6SQA7_MAIZE); contains Interpro domain(s) IPR006904 Protein of unknown function DUF716	31.65	32.25	28.13	25.53	29.26	34.59	6.7	7.39	0.99	1.28	0.33	0.48	0.22	0.22	0	0	0.14	0	0	0	0.1	0	0	0.07	0	0	29.31	24.82	ORTHOMCL20843	1	1	0	0	0
Solyc01g017610	Alliinase (Fragment) (AHRD V1 ***- D2CXM3_ALLSA); contains Interpro domain(s) IPR006948 Allinase, C-terminal	0	0	0	0	0	0	0	0	0	0	0	0	0	0	0	0	0	0	0	0	0	0	0	0	0	0	0	0	NA
Solyc01g017620	Unknown Protein (AHRD V1)	0	0	0	0	0	0	0	0	0	0	0	0	0	0	0	0	0	0	0	0	0	0	0	0	0	0	0	0	NA
Solyc01g017630	Ribosomal protein S4 (AHRD V1 ***- B6VJZ4_VITVI); contains Interpro domain(s) IPR002942 RNA-binding S4	0	0	0	0	0	0	0	0	0	0	0	0	0	0.29	0	0	0	0	0	0	0	0	0	0	0	0	0	0	NA
Solyc01g017640	Unknown Protein (AHRD V1)	0	0	0	0	0	0	0	0	0	0	0	0	0	0	0	0	0	0	0	0	0	0	0	0	0	0	0	0	NA
Solyc01g017650	Unknown Protein (AHRD V1)	0	0	0	0	0	0	0	0	0	0	0	0	0	0	0	0	0	0	0	0	0	0	0	0	0	0	0	0	NA
Solyc01g017660	Unknown Protein (AHRD V1)	0	0	0	0	0	0	0	0	0	0	0	0	0	0	0	0	0	0	0	0	0	0	0	0	0	0	0	0	NA
Solyc01g017670	Unknown Protein (AHRD V1)	0	0	0	0	0	0	0	0	0	0	0	0	0	0	0	0	0	0	0	0	0	0	0	0	0	0	0	0	NA
Solyc01g017680	Unknown Protein (AHRD V1)	0	0	0	0	0	0	0	0	0	0	0	0	0	0	0	0	0	0	0	0	0	0	0	0	0	0	0	0	NA
Solyc01g017690	Nbs, resistance protein fragment	0	0	0	0	0	0	0	0	0	0	0	0	0	0	0	0	0	0	0	0	0	0	0	0	0	0	0	0	NA
Solyc01g017700	Resistance protein PSH-RGH7 (AHRD V1 ***- B0FWN8_SOLTU)	0	0	0	0	0	0	0	0	0	0	0	0	0	0	0	0	0	0	0	0	0	0	0	0	0	0	0	0	NA
Solyc01g017710	Unknown Protein (AHRD V1)	0	0	1.27	5.89	1.86	0.63	1.97	2.62	0.76	0	0	0	0	0	1.69	0	0	0	0.49	0	1.7	3.49	0	0.61	0	1.43	0	0	NA
Solyc01g017720	Unknown Protein (AHRD V1)	4	1.82	5.69	4.79	1.51	0.51	3.2	2.13	0	1.25	1.51	0.66	0.51	1.03	1.37	1.7	0	0	0	0.41	0.69	0	3.9	0	0.51	0.58	0	0	NA
Solyc01g017730	Unknown Protein (AHRD V1)	0	0	0	0	0	0	0	0	0	0	0	0	0	0	0	0	0	0	0	0	0	0	0	0	0	0	0	0	NA
Solyc01g017740	Cytochrome b6 (AHRD V1 *-*- B7T3I6_9ROSI); contains Interpro domain(s) IPR005797 Cytochrome b/b6, N-terminal	0.29	0.89	0	0.35	2.3	1.01	0	0	0.4	0	4.42	1.28	3.33	3.35	0	0.74	0	0.33	1.81	1.61	0.9	1.39	3.05	1.63	1.34	0	2.83	1.26	NA
Solyc01g017750	Unknown Protein (AHRD V1)	0.19	0	0	0	0	0	0	0	0	0	0	0	0	0	0	0	0	0	0	0	0	0	0	0	0	0	0	0	NA
Solyc01g017760	Unknown Protein (AHRD V1)	0	0	0	0	0	0	0	0	0	0	0	0	0	0	0	0	0	0	0	0	0	0	0	0	0	0	0	0	ORTHOMCL4103	1	5	0	0	0
Solyc01g017770	F-box family protein (AHRD V1 ***- D7MFP4_ARALY); contains Interpro domain(s) IPR013187 F-box associated type 3	0	0	0	0	0	0	0	0	0	0	0	0	0	0	0	0.1	0	0	0	0	0	0	0	0	0	0	0	0	ORTHOMCL13931	1	2	0	0	0
Solyc01g017780	Transposon Ty1-BR Gag-Pol polyprotein (AHRD V1 ***- YB12B_YEAST); contains Interpro domain(s) IPR001584 Integrase, catalytic core	0	0	0	0	0	0	0	0	0	0	0	0	0	0	0	0	0	0	0	0	0	0	0	0	0	0	0	0	ORTHOMCL109	35	0	0	4	2
Solyc01g017790	ARID/BRIGHT DNA-binding domain-containing protein (AHRD V1 ***- D7KTU4_ARALY); contains Interpro domain(s) IPR008978 HSP20-like chaperone	0	0	0	0	0	0	0	0	0	0	0	0	0	0	0	0	0	0	0	0	0	0	0	0	0	0	0	0	ORTHOMCL20848	2	0	0	0	0
Solyc01g017800	Unknown Protein (AHRD V1)	0	0	0	0	0	0	0	0	0	0	0	0	0	0	0	0	0	0	0	0	0	0	0	0	0	0	0	0	NA
Solyc01g017810	Transposase family tnp2 protein (AHRD V1 *--- Q6ATT2_ORYSJ)	0	0	0	0	0	0	0	0	0	0	0	0	0	0	0	0	0	0	0	0	0	0	0	0	0	0	0	0	ORTHOMCL11	74	2	0	1	2
Solyc01g017820	Unknown Protein (AHRD V1)	0	0	0	0	0	0	0	0	0	0	0	0	0	0	0	0	0	0	0	0	0	0	0	0	0	0	0	0	NA
Solyc01g017830	Transposase family tnp2 protein (AHRD V1 *--- Q6ATT2_ORYSJ)	0	0	0	0	0	0	0	0	0	0	0	0	0	0	0	0	0	0	0	0	0	0	0	0	0	0	0	0	ORTHOMCL11	74	2	0	1	2
Solyc01g017840	subunit of replication protein A (AHRD V1 *-*- A6BLP0_IPONI); contains Interpro domain(s) IPR016027 Nucleic acid-binding, OB-fold-like	0.29	0.29	0.25	0.26	0.08	0.5	0	0	0.2	0.4	0.61	0.74	0.74	1.08	0.55	0.82	0.08	0	0	0	0.22	0	0.13	0.16	0	0.28	0	0	ORTHOMCL356	9	11	0	0	0
Solyc01g017850	Helicase-like protein (AHRD V1 *-*- Q9AYF0_ORYSJ); contains Interpro domain(s) IPR010285 Protein of unknown function DUF889, eukaryote	0	0.04	0	0.04	0.04	0	0	0	0	0	0	0	0	0	0	0	0	0	0	0	0	0	0	0	0	0	0	0.05	ORTHOMCL156	9	5	1	0	19
Solyc01g017860	Unknown Protein (AHRD V1)	4.34	4.44	3.78	2.16	2.46	4.59	3.47	4.77	5.51	6.1	7.96	4.8	12.03	11.27	6.69	4.6	7.46	6.1	10.29	11.03	4.49	5.2	2.54	4.46	5.41	5.18	1.01	2.1	NA
Solyc01g017870	Unknown Protein (AHRD V1)	4.16	3.27	0	0	0	0	0.38	0	0	0.45	0	0	0	0	0	0	0	0	0	0	0	0	0.56	0.72	0	0	0	0	ORTHOMCL20842	1	1	0	0	0
Solyc01g017880	Unknown Protein (AHRD V1)	0	0	0	0	0	0	0	0	0	0	0	0	0	0	0	0	0	0	0	0	0	0	0	0	0	0	0	0	NA
Solyc01g017890	Unknown Protein (AHRD V1)	0	0	0	0	0	0	0	0	0	0	0	0	0	0	0	0	0	0	0	0	0	0	0	0	0	0	0	0	NA
Solyc01g017900	Unknown Protein (AHRD V1)	0	0	0	0	0	0	0	0	0	0	0	0	0	0	0	0	0	0	0	0	0	0	0	0	0	0	0	0	NA
Solyc01g017910	Unknown Protein (AHRD V1)	0	0	0	0	0	0	0	0	0	0	0	0	0	0	0	0	0	0	0	0	0	0	0	0	0	0	0	0	NA
Solyc01g017920	Unknown Protein (AHRD V1)	0	0	0	0	0	0	0	0	0	0	0	0	0	0	0	0	0	0	0	0	0	0	0	0	0	0	0	0	NA
Solyc01g017930	Unknown Protein (AHRD V1)	0	0	0	0	0	0	0	0	0	0	0	0	0	0	0	0	0	0	0	0	0	0	0	0	0	0	0	0	NA
Solyc01g017940	Unknown Protein (AHRD V1)	0	0	0	0	0	0	0	0	0	0	0	0	0	0	0	0	0	0	0	0	0	0	0	0	0	0	0	0	NA
Solyc01g017950	Unknown Protein (AHRD V1)	0	0	0	0	0	0	0	0	0	0	0	0	0	0	0	0	0	0	0	0	0	0	0	0	0	0	0	0	NA
Solyc01g017960	Unknown Protein (AHRD V1)	0	0	0	0	0	0	0	0	0	0	0	0	0	0	0	0	0	0	0	0	0	0	0	0	0	0	0	0	ORTHOMCL20841	2	0	0	0	0
Solyc01g017970	Unknown Protein (AHRD V1)	0	0	0	0	0	0	0	0	0	0	0	0	0	0	0	0	0	0	0	0	0	0	0	0	0	0	0	0	ORTHOMCL20841	2	0	0	0	0
Solyc01g017980	Transposase (AHRD V1 **-- Q6IMW0_ORYSA)	0	0	0	0	0	0	0	0	0	0	0	0	0	0	0	0	0	0	0	0	0	0	0	0	0	0	0	0	ORTHOMCL11	74	2	0	1	2
Solyc01g017990	Unknown Protein (AHRD V1)	0	0	0	0	0	0	0	0	0	0	0	0	0	0	0	0	0	0	0	0	0	0	0	0	0	0	0	0	NA
Solyc01g018000	Unknown Protein (AHRD V1)	0	0	0	0	0	0	0	0	0	0	0	0	0	0	0	0	0	0	0	0	0	0	0	0	0	0	0	0	NA
Solyc01g018010	Unknown Protein (AHRD V1)	0	3.23	1.23	2.52	2.39	4.87	5.06	3.79	4.38	1.48	5.35	4.66	2.42	6.08	1.62	1.34	1.14	1.18	0.94	0	0	0	0	0	0	0	0	0	NA
Solyc01g018020	Transketolase-like protein (AHRD V1 ***- Q8LE99_ARATH); contains Interpro domain(s) IPR005478 Bacterial transketolase	3.18	3.21	6.55	7.22	0	0	0.04	0	0	0	0	0	0	0	0	0	0.08	0	0	0.03	3.48	0.98	1.14	1.33	1.7	0.8	0.1	0	ORTHOMCL804	3	3	2	3	2
Solyc01g018040	Protein FAR1-RELATED SEQUENCE 5 (AHRD V1 ***- FRS5_ARATH); contains Interpro domain(s) IPR018289 MULE transposase, conserved domain	0	0	0	0	0	0	0	0	0	0	0	0	0	0	0	0	0	0	0	0	0	0	0	0	0	0	0	0	NA
Solyc01g018050	Unknown Protein (AHRD V1)	0	0	0	0	0	0	0	0	0	0	0	0	0	0	0	0	0	0	0	0	0	0	0	0	0	0	0	0	NA
Solyc01g018060	30S ribosomal protein S7 chloroplastic (AHRD V1 ***- D3WBE1_9BORA); contains Interpro domain(s) IPR000235 Ribosomal protein S7	2.63	3.77	4.29	0.63	17.92	15.82	0	0	2.19	1.48	0.89	3.88	2.42	3.04	0.81	4.02	0.57	1.18	1.87	3.9	0	0.84	1.85	0	1.21	0	4.41	0	NA
Solyc01g018070	ARID/BRIGHT DNA-binding domain-containing protein (AHRD V1 ***- D7KTU4_ARALY); contains Interpro domain(s) IPR008978 HSP20-like chaperone	0	0	0	0	0	0	0	0	0	0	0	0	0	0	0	0	0	0	0	0	0	0	0	0	0	0	0	0	NA
Solyc01g018080	Unknown Protein (AHRD V1)	0	0	0	0	0	0	0	0	0	0	0	0	0	0	0	0	0	0	0	0	0	0	0	0	0	0	0	0	NA
Solyc01g018090	Photosystem I P700 chlorophyll a apoprotein A1 (AHRD V1 *-*- B0Z4L7_OENAR); contains Interpro domain(s) IPR001280 Photosystem I psaA and psaB	0	0.58	0.66	1.36	2.9	3.94	0	0	0	1.2	11.56	7.55	6.2	6.24	0.44	0	0	0	0.76	0.26	1.33	0.45	0	0.64	0.33	1.11	0	0	NA
Solyc01g018100	Unknown Protein (AHRD V1)	0	0	0	0	0	0	0	0	0	0	0	0	0	0	0	0	0	0	0	0	0	0	0	0	0	0	0	0	NA
Solyc01g019100	Unknown Protein (AHRD V1)	0	0	0	0	0	0	0	0	0	0	0	0	0	0	0	0	0	0	0	0	0	0	0	0	0	0	0	0	NA
Solyc01g020100	Unknown Protein (AHRD V1)	0	0	0	0	0	0	0	0	0	0	0	0	0	0	0	0	0	0	0	0	0	0	0	0	0	0	0	0	NA
Solyc01g020110	Zinc finger family protein (AHRD V1 *-*- D7LC67_ARALY)	0	0	0	0	0	0	0	0	0	0	0	0	0	0	0	0	0	0	0	0	0	0	0	0	0	0	0	0	ORTHOMCL13930	3	0	0	0	0
Solyc01g020120	DNA replication licensing factor mcm6 (AHRD V1 ***- C4JDH8_UNCRE); contains Interpro domain(s) IPR016027 Nucleic acid-binding, OB-fold-like	0.38	0	0.22	0	0.43	0.44	0.23	0.91	0.79	0.8	0.32	1.12	0.22	0	1.75	2.41	0	0.64	1.01	0	0	0	0.67	0	0.44	0.49	0	0.82	NA
Solyc01g020130	Glycosyltransferase (AHRD V1 ***- Q50HV0_SOLLC); contains Interpro domain(s) IPR005027 Glycosyl transferase, family 43	4.48	3.74	3.83	5.04	5.08	6.97	16.14	13.05	4.56	3.73	4.49	5.8	4.3	4.12	9.58	7.1	7.74	8.64	10.74	8.46	4.97	5.99	3.53	3.28	4.32	4.41	4.59	5.83	NA
Solyc01g020140	Glycosyltransferase (AHRD V1 ***- Q50HV0_SOLLC); contains Interpro domain(s) IPR005027 Glycosyl transferase, family 43	7.27	7.28	5.51	6.05	6.27	8.58	22.96	22.55	7.89	7.55	7.49	7.92	5.26	5.66	9.5	6.83	9.43	11.9	15.18	13.44	15.22	17.66	12.19	7.44	10.19	9.68	6.39	11	NA
Solyc01g020150	Glycosyltransferase (AHRD V1 ***- Q50HU7_SOLTU); contains Interpro domain(s) IPR005027 Glycosyl transferase, family 43	15.96	12.42	11.7	11.63	15.34	9.21	40.4	35.77	12.5	12.19	8.81	16.37	7.96	15.22	14.97	15	21.84	26.52	19.44	23.73	10.78	12.74	9.12	11.66	7.99	7.68	3.87	10.06	NA
Solyc01g020160	Unknown Protein (AHRD V1)	1.48	1.13	0.43	0.44	0.84	0.43	1.33	0.89	1.02	0	0	0.54	0	0.43	0	0	0	0.83	0	0	0	0	0.65	0	0	0.48	0	0	NA
Solyc01g020170	Basic helix-loop-helix family protein (AHRD V1 ***- D7KF18_ARALY); contains Interpro domain(s) IPR011598 Helix-loop-helix DNA-binding	0	0	0	0	0	0.11	0	0	0	0	0	0	0	0	0	0	0	0	0	0	0	0	0	0	0	0	0	0	ORTHOMCL1000	4	4	1	2	1
Solyc01g020180	Transcription factor bHLH95 (AHRD V1 *-*- BH095_ARATH)	0	0	0	0	0	0	0	0	0	0	0	0	0	0	0	0	0	0	0	0	0	0	0	0	0	0	0	0	NA
Solyc01g020190	Membrane-associated ring finger 6 (AHRD V1 *--- B3VKM1_PIG); contains Interpro domain(s) IPR011016 Zinc finger, RING-CH-type	5.2	6.44	8.06	9.05	5.71	6.91	20.41	16.42	11.13	12.17	17.06	14.63	32.7	28.17	19.89	22.83	13.5	14.87	17.93	15.72	13.94	16.84	15.46	11.99	13.6	12.31	1.54	2.28	NA
Solyc01g020200	Hypothetical chloroplast RF1 (AHRD V1 ***- B1NWK7_MANES)	0	0	0	0.22	0	0.21	0	0.44	0	0	2.47	1.34	0.84	0	0.56	0.23	0.4	0.2	0.49	0.34	4.25	2.62	2.56	1.43	1.26	0.24	0	0	ORTHOMCL11439	2	1	0	1	0
Solyc01g020210	Mutator-like transposase (AHRD V1 ***- Q9SL18_ARATH)	0	0	0	0	0	0	0	0	0	0	0	0	0	0	0	0	0	0	0	0	0	0	0	0	0	0	0	0	ORTHOMCL6203	5	0	0	0	0
Solyc01g020220	Replication factor C subunit 5 (AHRD V1 ***- B6T5I0_MAIZE); contains Interpro domain(s) IPR019483 DNA polymerase III, clamp-loader complex, subunit E, C-terminal	6.85	8.17	6.33	5.73	7.45	6.72	12.96	11.71	16.4	7.39	8.58	9.55	13.57	13.11	9.11	10.51	5.2	5.7	9.85	8.68	5.11	5.55	5.93	6.21	6.16	5.02	3.93	11.84	NA
Solyc01g020230	Unknown Protein (AHRD V1)	1.19	1.21	1.38	0.35	1.68	0	3.56	3.55	2.88	2.08	2.01	0	2.04	2.05	2.28	2.26	2.89	1.67	3.69	3.29	2.76	2.37	0.52	1.66	2.05	1.54	0.83	0	NA
Solyc01g020240	T31J12.1 protein (Fragment) (AHRD V1 ***- Q9ZPZ6_ARATH)	14.98	15	11.71	10.53	12.14	10.23	13.62	15.82	22.79	21.23	18.02	14.1	21.5	14.2	15.91	18.32	14.94	15.55	24.38	22.09	15.25	14.35	18.66	17.14	23.71	27.15	10.4	8.96	ORTHOMCL10839	1	1	1	1	1
Solyc01g020250	Pol polyprotein (AHRD V1 ***- POL_SMRVH)	0	0	0	0	0	0	0	0	0	0	0	0	0	0	0	0	0	0	0	0	0	0	0	0	0	0	0	0	NA
Solyc01g020260	Unknown Protein (AHRD V1)	1.24	0	0	0	0	0	0	0	0	0	0	0	0	0	0	0	0	0	0	0	0	0	0	0	1.42	0	0	0	NA
Solyc01g020270	Ulp1 protease family C-terminal catalytic domain containing protein (AHRD V1 ***- Q60D46_SOLDE); contains Interpro domain(s) IPR003653 Peptidase C48, SUMO/Sentrin/Ubl1	0	0	0	0	0	0	0	0	0	0	0	0	0	0	0	0	0	0	0	0	0	0	0	0	0	0	0	0	ORTHOMCL155	32	2	0	0	0
Solyc01g020280	Unknown Protein (AHRD V1)	0	0	0	0	0	0	0	0	0	0	0	0	0	0	0	0	0	0	0	0	0	0	0	0	0	0	0	0	NA
Solyc01g020290	60S ribosomal protein L7A-like (AHRD V1 ***- Q2VCI3_SOLTU)	4.66	3.18	0	1.24	2.35	0	1.86	1.24	2.87	5.81	2.63	3.05	2.37	2.39	5.58	4.6	5.61	2.91	1.84	0.96	0	1.65	2.72	0	0	0	0	3.75	NA
Solyc01g020300	Unknown Protein (AHRD V1)	0	0	0	0	0	0	0	0	0	0	0	0	0	0	0	0	0	0	0	0	0	0	0	0	0	0	0	0	NA
Solyc01g020310	Pol polyprotein (AHRD V1 ***- Q94FM1_CITPA)	0	0	0	0	0	0	0	0	0	0	0	0	0	0	0	0	0	0	0	0	0	0	0	0	0	0	0	0	ORTHOMCL20840	2	0	0	0	0
Solyc01g020320	Unknown Protein (AHRD V1)	17.48	14.34	11.17	13.94	8.57	11.64	6.05	8.49	15.5	15.49	7.73	7.66	13.01	13.09	9.95	12.61	8.54	8.32	5.74	7.71	13.46	13.58	12.7	9.7	9.25	9.85	5.27	7.99	ORTHOMCL9619	1	2	1	0	1
Solyc01g020330	Unknown Protein (AHRD V1)	1.66	3.39	6.75	2.97	1.88	2.87	6.96	5.96	9.19	6.99	18.24	17.11	26.62	17.22	8.94	9.48	11.69	10.24	9.58	7.66	0	0	0	0	0	0	0	0	NA
Solyc01g020340	Pentatricopeptide repeat-containing protein (AHRD V1 ***- D7MLP6_ARALY); contains Interpro domain(s) IPR002885 Pentatricopeptide repeat	0.56	0.32	0.22	0.37	0.36	0.51	0.75	0.75	0.52	0.35	0.74	1.2	1.37	1.08	0.97	0.56	0.34	0.28	0.56	0.52	0.39	0.8	0.44	0.42	0.29	0.82	0.61	1.82	ORTHOMCL14554	1	1	0	1	0
[truncated: 32,818 more rows]

## Sheet: Supplementary Table 2
Supplementary Table 2. List of categorized unusual genes based on GO ID by GoMiner (p < 0.05; BOLD).
[truncated: 314 more rows]

## Sheet: Supplementary Table 3
Supplementary Table 3. The list of categorized genes in blocks of which mean Ks value is larger than 1.5, based on GO ID by GoMiner (p < 0.01).
[truncated: 195 more rows]

[truncated: 75 more sheets: Supplementary Table 4, Supplementary Table 5, Supplementary Table 6, Supplementary Table 7, Supplementary Table 8, Supplementary Table 9, Supplementary Table 10, Supplementary Table 11, Supplementary Table 12, Supplementary Table 13, Supplementary Table 14, Supplementary Table 15, Supplementary Table 16, Supplementary Table 17, Supplementary Table 18, Supplementary Table 19, Supplementary Table 20, Supplementary Table 21, Supplementary Table 22, Supplementary Table 23 …]
