# Supplementary material for: The tomato genome sequence provides insights into fleshy fruit evolution
Source: Springer Nature journal article supplement (doi:10.1038/nature11119), 2012-05-01
Supplement: 41586_2012_BFnature11119_MOESM69_ESM.zip [file 41586_2012_BFnature11119_MOESM69_ESM.zip]

Archive with 270 entries (269 files):
- Supplementary_HTM_tables/
- Supplementary_HTM_tables/Supplementary_HTM_Table_1.htm
- Supplementary_HTM_tables/Supplementary_HTM_Table_100_miR1083_S01.htm
- Supplementary_HTM_tables/Supplementary_HTM_Table_101_miR1088_S01.htm
- Supplementary_HTM_tables/Supplementary_HTM_Table_102_miR1090_S01.htm
- Supplementary_HTM_tables/Supplementary_HTM_Table_103_miR1101_S02.htm
- Supplementary_HTM_tables/Supplementary_HTM_Table_104_miR1105_S01.htm
- Supplementary_HTM_tables/Supplementary_HTM_Table_105_miR1106_S01.htm
- Supplementary_HTM_tables/Supplementary_HTM_Table_106_miR1120_S01.htm
- Supplementary_HTM_tables/Supplementary_HTM_Table_107_miR1134_S01.htm
- Supplementary_HTM_tables/Supplementary_HTM_Table_108_miR1135_S01.htm
- Supplementary_HTM_tables/Supplementary_HTM_Table_109_miR1154_S01.htm
- Supplementary_HTM_tables/Supplementary_HTM_Table_10_miR163_S01.htm
- Supplementary_HTM_tables/Supplementary_HTM_Table_110_miR1160_S02.htm
- Supplementary_HTM_tables/Supplementary_HTM_Table_111_miR1162_S01.htm
- Supplementary_HTM_tables/Supplementary_HTM_Table_112_miR1172_S01.htm
- Supplementary_HTM_tables/Supplementary_HTM_Table_113_miR1217_S01.htm
- Supplementary_HTM_tables/Supplementary_HTM_Table_114_miR1310_S01.htm
- Supplementary_HTM_tables/Supplementary_HTM_Table_115_miR1318_S01.htm
- Supplementary_HTM_tables/Supplementary_HTM_Table_116_miR1426_S01.htm
- Supplementary_HTM_tables/Supplementary_HTM_Table_117_miR1428_S03.htm
- Supplementary_HTM_tables/Supplementary_HTM_Table_118_miR1432_S01.htm
- Supplementary_HTM_tables/Supplementary_HTM_Table_119_miR1433_S01.htm
- Supplementary_HTM_tables/Supplementary_HTM_Table_11_miR164_S01.htm
- Supplementary_HTM_tables/Supplementary_HTM_Table_120_miR1436_S01.htm
- Supplementary_HTM_tables/Supplementary_HTM_Table_121_miR1439_S01.htm
- Supplementary_HTM_tables/Supplementary_HTM_Table_122_miR1446_S01.htm
- Supplementary_HTM_tables/Supplementary_HTM_Table_123_miR1449_S01.htm
- Supplementary_HTM_tables/Supplementary_HTM_Table_124_miR1507_S01.htm
- Supplementary_HTM_tables/Supplementary_HTM_Table_125_miR1509_S01.htm
- Supplementary_HTM_tables/Supplementary_HTM_Table_126_miR1510_S02.htm
- Supplementary_HTM_tables/Supplementary_HTM_Table_127_miR1510_S03.htm
- Supplementary_HTM_tables/Supplementary_HTM_Table_128_miR1511_S01.htm
- Supplementary_HTM_tables/Supplementary_HTM_Table_129_miR1520_S02.htm
- Supplementary_HTM_tables/Supplementary_HTM_Table_12_miR166_S01.htm
- Supplementary_HTM_tables/Supplementary_HTM_Table_130_miR1520_S05.htm
- Supplementary_HTM_tables/Supplementary_HTM_Table_131_miR1521_S01.htm
- Supplementary_HTM_tables/Supplementary_HTM_Table_132_miR1523_S01.htm
- Supplementary_HTM_tables/Supplementary_HTM_Table_133_miR1526_S01.htm
- Supplementary_HTM_tables/Supplementary_HTM_Table_134_miR1527_S01.htm
- Supplementary_HTM_tables/Supplementary_HTM_Table_135_miR1530_S01.htm
- Supplementary_HTM_tables/Supplementary_HTM_Table_136_miR1847_S01.htm
- Supplementary_HTM_tables/Supplementary_HTM_Table_137_miR1847_S02.htm
- Supplementary_HTM_tables/Supplementary_HTM_Table_138_miR1850_S01.htm
- Supplementary_HTM_tables/Supplementary_HTM_Table_139_miR1853_S02.htm
- Supplementary_HTM_tables/Supplementary_HTM_Table_13_miR167_S01.htm
- Supplementary_HTM_tables/Supplementary_HTM_Table_140_miR1854_S01.htm
- Supplementary_HTM_tables/Supplementary_HTM_Table_141_miR1857_S01.htm
- Supplementary_HTM_tables/Supplementary_HTM_Table_142_miR1862_S01.htm
- Supplementary_HTM_tables/Supplementary_HTM_Table_143_miR1863_S01.htm
- Supplementary_HTM_tables/Supplementary_HTM_Table_144_miR1869_S01.htm
- Supplementary_HTM_tables/Supplementary_HTM_Table_145_miR1870_S02.htm
- Supplementary_HTM_tables/Supplementary_HTM_Table_146_miR1871_S01.htm
- Supplementary_HTM_tables/Supplementary_HTM_Table_147_miR1872_S01.htm
- Supplementary_HTM_tables/Supplementary_HTM_Table_148_miR1873_S01.htm
- Supplementary_HTM_tables/Supplementary_HTM_Table_149_miR1877_S01.htm
- Supplementary_HTM_tables/Supplementary_HTM_Table_14_miR167_S02.htm
- Supplementary_HTM_tables/Supplementary_HTM_Table_150_miR1884_S01.htm
- Supplementary_HTM_tables/Supplementary_HTM_Table_151_miR1886_S02.htm
- Supplementary_HTM_tables/Supplementary_HTM_Table_152_miR1886_S03.htm
- Supplementary_HTM_tables/Supplementary_HTM_Table_153_miR1887_S01.htm
- Supplementary_HTM_tables/Supplementary_HTM_Table_154_miR1916_S01.htm
- Supplementary_HTM_tables/Supplementary_HTM_Table_155_miR1917_S01.htm
- Supplementary_HTM_tables/Supplementary_HTM_Table_156_miR1919_S01.htm
- Supplementary_HTM_tables/Supplementary_HTM_Table_157_miR2083_S02.htm
- Supplementary_HTM_tables/Supplementary_HTM_Table_158_miR2084_S01.htm
- Supplementary_HTM_tables/Supplementary_HTM_Table_159_miR2085_S01.htm
- Supplementary_HTM_tables/Supplementary_HTM_Table_15_miR168_S01.htm
- Supplementary_HTM_tables/Supplementary_HTM_Table_160_miR2089_S01.htm
- Supplementary_HTM_tables/Supplementary_HTM_Table_161_miR2090_S01.htm
- Supplementary_HTM_tables/Supplementary_HTM_Table_162_miR2096_S02.htm
- Supplementary_HTM_tables/Supplementary_HTM_Table_163_miR2101_S02.htm
- Supplementary_HTM_tables/Supplementary_HTM_Table_164_miR2105_S01.htm
- Supplementary_HTM_tables/Supplementary_HTM_Table_165_miR2108_S01.htm
- Supplementary_HTM_tables/Supplementary_HTM_Table_166_miR2111_S02.htm
- Supplementary_HTM_tables/Supplementary_HTM_Table_167_miR2118_S01.htm
- Supplementary_HTM_tables/Supplementary_HTM_Table_168_miR2275_S01.htm
- Supplementary_HTM_tables/Supplementary_HTM_Table_169_miR2609_S01.htm
- Supplementary_HTM_tables/Supplementary_HTM_Table_16_miR168_S02.htm
- Supplementary_HTM_tables/Supplementary_HTM_Table_170_miR2620_S01.htm
- Supplementary_HTM_tables/Supplementary_HTM_Table_171_miR2621_S01.htm
- Supplementary_HTM_tables/Supplementary_HTM_Table_172_miR2626_S01.htm
- Supplementary_HTM_tables/Supplementary_HTM_Table_173_miR2629_S01.htm
- Supplementary_HTM_tables/Supplementary_HTM_Table_174_miR2638_S01.htm
- Supplementary_HTM_tables/Supplementary_HTM_Table_175_miR2663_S01.htm
- Supplementary_HTM_tables/Supplementary_HTM_Table_176_miR2664_S01.htm
- Supplementary_HTM_tables/Supplementary_HTM_Table_177_miR2666_S01.htm
- Supplementary_HTM_tables/Supplementary_HTM_Table_178_miR2667_S01.htm
- Supplementary_HTM_tables/Supplementary_HTM_Table_179_miR2676_S01.htm
- Supplementary_HTM_tables/Supplementary_HTM_Table_17_miR169_S01.htm
- Supplementary_HTM_tables/Supplementary_HTM_Table_180_miR2678_S01.htm
- Supplementary_HTM_tables/Supplementary_HTM_Table_181_miR2679_S01.htm
- Supplementary_HTM_tables/Supplementary_HTM_Table_182_miR2865_S01.htm
- Supplementary_HTM_tables/Supplementary_HTM_Table_183_miR2873_S01.htm
- Supplementary_HTM_tables/Supplementary_HTM_Table_184_miR2905_S01.htm
- Supplementary_HTM_tables/Supplementary_HTM_Table_185_miR2911_S01.htm
- Supplementary_HTM_tables/Supplementary_HTM_Table_186_miR2916_S01.htm
- Supplementary_HTM_tables/Supplementary_HTM_Table_187_miR2923_S01.htm
- Supplementary_HTM_tables/Supplementary_HTM_Table_188_miR2928_S01.htm
- Supplementary_HTM_tables/Supplementary_HTM_Table_189_miR2931_S01.htm
- Supplementary_HTM_tables/Supplementary_HTM_Table_18_miR171_S01.htm
- Supplementary_HTM_tables/Supplementary_HTM_Table_190_miR2937_S01.htm
- Supplementary_HTM_tables/Supplementary_HTM_Table_191_miR2950_S01.htm
- Supplementary_HTM_tables/Supplementary_HTM_Table_192_miR3437_S01.htm
- Supplementary_HTM_tables/Supplementary_HTM_Table_193_miR3438_S01.htm
- Supplementary_HTM_tables/Supplementary_HTM_Table_194_miR3440_S01.htm
- Supplementary_HTM_tables/Supplementary_HTM_Table_195_miR3444_S02.htm
- Supplementary_HTM_tables/Supplementary_HTM_Table_196_miR3445_S01.htm
- Supplementary_HTM_tables/Supplementary_HTM_Table_197_miR3476_S01.htm
- Supplementary_HTM_tables/Supplementary_HTM_Table_198_miR3508_S01.htm
- Supplementary_HTM_tables/Supplementary_HTM_Table_199_miR3509_S02.htm
- Supplementary_HTM_tables/Supplementary_HTM_Table_19_miR171_S02.htm
- Supplementary_HTM_tables/Supplementary_HTM_Table_2.htm
- Supplementary_HTM_tables/Supplementary_HTM_Table_200_miR3511_S02.htm
- Supplementary_HTM_tables/Supplementary_HTM_Table_201_miR3512_S01.htm
- Supplementary_HTM_tables/Supplementary_HTM_Table_202_miR3513_S02.htm
- Supplementary_HTM_tables/Supplementary_HTM_Table_203_miR3514_S01.htm
- Supplementary_HTM_tables/Supplementary_HTM_Table_204_miR3515_S01.htm
- Supplementary_HTM_tables/Supplementary_HTM_Table_205_miR3516_S01.htm
- Supplementary_HTM_tables/Supplementary_HTM_Table_206_miR3519_S01.htm
- Supplementary_HTM_tables/Supplementary_HTM_Table_207_miR3522_S01.htm
- Supplementary_HTM_tables/Supplementary_HTM_Table_208_miR3625_S01.htm
- Supplementary_HTM_tables/Supplementary_HTM_Table_209_miR3627_S01.htm
- Supplementary_HTM_tables/Supplementary_HTM_Table_20_miR172_S01.htm
- Supplementary_HTM_tables/Supplementary_HTM_Table_210_miR3637_S01.htm
- Supplementary_HTM_tables/Supplementary_HTM_Table_211_miR3699_S01.htm
- Supplementary_HTM_tables/Supplementary_HTM_Table_212_miR3709_S01.htm
- Supplementary_HTM_tables/Supplementary_HTM_Table_213_miR3946_S01.htm
- Supplementary_HTM_tables/Supplementary_HTM_Table_214_miR3948_S01.htm
- Supplementary_HTM_tables/Supplementary_HTM_Table_215_miR3949_S01.htm
- Supplementary_HTM_tables/Supplementary_HTM_Table_216_miR3953_S01.htm
- Supplementary_HTM_tables/Supplementary_HTM_Table_217_miR3954_S01.htm
- Supplementary_HTM_tables/Supplementary_HTM_Table_218_miR4243_S01.htm
- Supplementary_HTM_tables/Supplementary_HTM_Table_219_miR4245_S01.htm
- Supplementary_HTM_tables/Supplementary_HTM_Table_21_miR173_S01.htm
- Supplementary_HTM_tables/Supplementary_HTM_Table_220_miR4248_S01.htm
- Supplementary_HTM_tables/Supplementary_HTM_Table_221_miR4250_S01.htm
- Supplementary_HTM_tables/Supplementary_HTM_Table_222_miR4345_S01.htm
- Supplementary_HTM_tables/Supplementary_HTM_Table_223_miR4348_S01.htm
- Supplementary_HTM_tables/Supplementary_HTM_Table_224_miR4349_S01.htm
- Supplementary_HTM_tables/Supplementary_HTM_Table_225_miR4352_S01.htm
- Supplementary_HTM_tables/Supplementary_HTM_Table_226_miR4371_S01.htm
- Supplementary_HTM_tables/Supplementary_HTM_Table_227_miR4376_S01.htm
- Supplementary_HTM_tables/Supplementary_HTM_Table_228_miR4380_S01.htm
- Supplementary_HTM_tables/Supplementary_HTM_Table_229_miR4391_S01.htm
- Supplementary_HTM_tables/Supplementary_HTM_Table_22_miR319_S01.htm
- Supplementary_HTM_tables/Supplementary_HTM_Table_230_miR4393_S01.htm
- Supplementary_HTM_tables/Supplementary_HTM_Table_231_miR4404_S01.htm
- Supplementary_HTM_tables/Supplementary_HTM_Table_232_miR4405_S01.htm
- Supplementary_HTM_tables/Supplementary_HTM_Table_233_miR4406_S01.htm
- Supplementary_HTM_tables/Supplementary_HTM_Table_234_miR4407_S01.htm
- Supplementary_HTM_tables/Supplementary_HTM_Table_235_miR4408_S01.htm
- Supplementary_HTM_tables/Supplementary_HTM_Table_236_miR4411_S01.htm
- Supplementary_HTM_tables/Supplementary_HTM_Table_237_miR4413_S01.htm
- Supplementary_HTM_tables/Supplementary_HTM_Table_238_miR4414_S01.htm
- Supplementary_HTM_tables/Supplementary_HTM_Table_239_miR5021_S01.htm
- Supplementary_HTM_tables/Supplementary_HTM_Table_23_miR319_S03.htm
- Supplementary_HTM_tables/Supplementary_HTM_Table_240_miR5023_S01.htm
- Supplementary_HTM_tables/Supplementary_HTM_Table_241_miR5026_S01.htm
- Supplementary_HTM_tables/Supplementary_HTM_Table_242_miR5029_S01.htm
- Supplementary_HTM_tables/Supplementary_HTM_Table_243_miR5048_S01.htm
- Supplementary_HTM_tables/Supplementary_HTM_Table_244_miR5054_S01.htm
- Supplementary_HTM_tables/Supplementary_HTM_Table_245_miR5055_S01.htm
- Supplementary_HTM_tables/Supplementary_HTM_Table_246_miR5056_S01.htm
- Supplementary_HTM_tables/Supplementary_HTM_Table_247_miR5059_S01.htm
- Supplementary_HTM_tables/Supplementary_HTM_Table_248_miR5062_S01.htm
- Supplementary_HTM_tables/Supplementary_HTM_Table_249_miR5070_S01.htm
- Supplementary_HTM_tables/Supplementary_HTM_Table_24_miR390_S01.htm
- Supplementary_HTM_tables/Supplementary_HTM_Table_250_miR5071_S01.htm
- Supplementary_HTM_tables/Supplementary_HTM_Table_251_miR5072_S01.htm
- Supplementary_HTM_tables/Supplementary_HTM_Table_252_miR5075_S01.htm
- Supplementary_HTM_tables/Supplementary_HTM_Table_253_miR5077_S01.htm
- Supplementary_HTM_tables/Supplementary_HTM_Table_254_miR5079_S01.htm
- Supplementary_HTM_tables/Supplementary_HTM_Table_255_miR5083_S01.htm
- Supplementary_HTM_tables/Supplementary_HTM_Table_256_miR5138_S01.htm
- Supplementary_HTM_tables/Supplementary_HTM_Table_257_miR5139_S01.htm
- Supplementary_HTM_tables/Supplementary_HTM_Table_258_miR5140_S01.htm
- Supplementary_HTM_tables/Supplementary_HTM_Table_259_miR5142_S01.htm
- Supplementary_HTM_tables/Supplementary_HTM_Table_25_miR390_S02.htm
- Supplementary_HTM_tables/Supplementary_HTM_Table_260_miR5168_S01.htm
- Supplementary_HTM_tables/Supplementary_HTM_Table_261_miR5171_S01.htm
- Supplementary_HTM_tables/Supplementary_HTM_Table_262_miR5175_S01.htm
- Supplementary_HTM_tables/Supplementary_HTM_Table_263_miR5176_S02.htm
- Supplementary_HTM_tables/Supplementary_HTM_Table_264_miR5203_S01.htm
- Supplementary_HTM_tables/Supplementary_HTM_Table_265_miR5300_S01.htm
- Supplementary_HTM_tables/Supplementary_HTM_Table_266_miR5301_S01.htm
- Supplementary_HTM_tables/Supplementary_HTM_Table_267_miR5302_S01.htm
- Supplementary_HTM_tables/Supplementary_HTM_Table_268_miR5303_S01.htm
- Supplementary_HTM_tables/Supplementary_HTM_Table_269_miR5304_S01.htm
- Supplementary_HTM_tables/Supplementary_HTM_Table_26_miR391_S01.htm
- Supplementary_HTM_tables/Supplementary_HTM_Table_27_miR393_S01.htm
- Supplementary_HTM_tables/Supplementary_HTM_Table_28_miR394_S01.htm
- Supplementary_HTM_tables/Supplementary_HTM_Table_29_miR395_S01.htm
- Supplementary_HTM_tables/Supplementary_HTM_Table_30_miR396_S01.htm
- Supplementary_HTM_tables/Supplementary_HTM_Table_31_miR396_S02.htm
- Supplementary_HTM_tables/Supplementary_HTM_Table_32_miR397_S01.htm
- Supplementary_HTM_tables/Supplementary_HTM_Table_33_miR398_S01.htm
- Supplementary_HTM_tables/Supplementary_HTM_Table_34_miR398_S02.htm
- Supplementary_HTM_tables/Supplementary_HTM_Table_35_miR399_S01.htm
- Supplementary_HTM_tables/Supplementary_HTM_Table_36_miR403_S01.htm
- Supplementary_HTM_tables/Supplementary_HTM_Table_37_miR408_S01.htm
- Supplementary_HTM_tables/Supplementary_HTM_Table_38_miR408_S02.htm
- Supplementary_HTM_tables/Supplementary_HTM_Table_39_miR414_S01.htm
- Supplementary_HTM_tables/Supplementary_HTM_Table_3_miR156_S01.htm
- Supplementary_HTM_tables/Supplementary_HTM_Table_40_miR415_S01.htm
- Supplementary_HTM_tables/Supplementary_HTM_Table_41_miR417_S01.htm
- Supplementary_HTM_tables/Supplementary_HTM_Table_42_miR418_S01.htm
- Supplementary_HTM_tables/Supplementary_HTM_Table_43_miR419_S01.htm
- Supplementary_HTM_tables/Supplementary_HTM_Table_44_miR437_S01.htm
- Supplementary_HTM_tables/Supplementary_HTM_Table_45_miR446_S01.htm
- Supplementary_HTM_tables/Supplementary_HTM_Table_46_miR472_S01.htm
- Supplementary_HTM_tables/Supplementary_HTM_Table_47_miR473_S01.htm
- Supplementary_HTM_tables/Supplementary_HTM_Table_48_miR474_S01.htm
- Supplementary_HTM_tables/Supplementary_HTM_Table_49_miR477_S01.htm
- Supplementary_HTM_tables/Supplementary_HTM_Table_4_miR156_S02.htm
- Supplementary_HTM_tables/Supplementary_HTM_Table_50_miR479_S01.htm
- Supplementary_HTM_tables/Supplementary_HTM_Table_51_miR482_S01.htm
- Supplementary_HTM_tables/Supplementary_HTM_Table_52_miR482_S02.htm
- Supplementary_HTM_tables/Supplementary_HTM_Table_53_miR528_S01.htm
- Supplementary_HTM_tables/Supplementary_HTM_Table_54_miR529_S01.htm
- Supplementary_HTM_tables/Supplementary_HTM_Table_55_miR530_S01.htm
- Supplementary_HTM_tables/Supplementary_HTM_Table_56_miR535_S01.htm
- Supplementary_HTM_tables/Supplementary_HTM_Table_57_miR536_S01.htm
- Supplementary_HTM_tables/Supplementary_HTM_Table_58_miR773_S01.htm
- Supplementary_HTM_tables/Supplementary_HTM_Table_59_miR774_S01.htm
- Supplementary_HTM_tables/Supplementary_HTM_Table_5_miR158_S01.htm
- Supplementary_HTM_tables/Supplementary_HTM_Table_60_miR780_S01.htm
- Supplementary_HTM_tables/Supplementary_HTM_Table_61_miR811_S01.htm
- Supplementary_HTM_tables/Supplementary_HTM_Table_62_miR811_S03.htm
- Supplementary_HTM_tables/Supplementary_HTM_Table_63_miR812_S01.htm
- Supplementary_HTM_tables/Supplementary_HTM_Table_64_miR812_S04.htm
- Supplementary_HTM_tables/Supplementary_HTM_Table_65_miR818_S01.htm
- Supplementary_HTM_tables/Supplementary_HTM_Table_66_miR821_S01.htm
- Supplementary_HTM_tables/Supplementary_HTM_Table_67_miR827_S01.htm
- Supplementary_HTM_tables/Supplementary_HTM_Table_68_miR829_S01.htm
- Supplementary_HTM_tables/Supplementary_HTM_Table_69_miR835_S01.htm
- Supplementary_HTM_tables/Supplementary_HTM_Table_6_miR159_S01.htm
- Supplementary_HTM_tables/Supplementary_HTM_Table_70_miR837_S02.htm
- Supplementary_HTM_tables/Supplementary_HTM_Table_71_miR840_S01.htm
- Supplementary_HTM_tables/Supplementary_HTM_Table_72_miR844_S02.htm
- Supplementary_HTM_tables/Supplementary_HTM_Table_73_miR845_S01.htm
- Supplementary_HTM_tables/Supplementary_HTM_Table_74_miR846_S01.htm
- Supplementary_HTM_tables/Supplementary_HTM_Table_75_miR848_S01.htm
- Supplementary_HTM_tables/Supplementary_HTM_Table_76_miR855_S01.htm
- Supplementary_HTM_tables/Supplementary_HTM_Table_77_miR856_S01.htm
- Supplementary_HTM_tables/Supplementary_HTM_Table_78_miR857_S01.htm
- Supplementary_HTM_tables/Supplementary_HTM_Table_79_miR858_S01.htm
- Supplementary_HTM_tables/Supplementary_HTM_Table_7_miR159_S02.htm
- Supplementary_HTM_tables/Supplementary_HTM_Table_80_miR862_S02.htm
- Supplementary_HTM_tables/Supplementary_HTM_Table_81_miR865_S01.htm
- Supplementary_HTM_tables/Supplementary_HTM_Table_82_miR894_S01.htm
- Supplementary_HTM_tables/Supplementary_HTM_Table_83_miR897_S01.htm
- Supplementary_HTM_tables/Supplementary_HTM_Table_84_miR902_S01.htm
- Supplementary_HTM_tables/Supplementary_HTM_Table_85_miR902_S02.htm
- Supplementary_HTM_tables/Supplementary_HTM_Table_86_miR904_S01.htm
- Supplementary_HTM_tables/Supplementary_HTM_Table_87_miR916_S01.htm
- Supplementary_HTM_tables/Supplementary_HTM_Table_88_miR919_S02.htm
- Supplementary_HTM_tables/Supplementary_HTM_Table_89_miR950_S01.htm
- Supplementary_HTM_tables/Supplementary_HTM_Table_8_miR160_S01.htm
- Supplementary_HTM_tables/Supplementary_HTM_Table_90_miR952_S01.htm
- Supplementary_HTM_tables/Supplementary_HTM_Table_91_miR1028_S01.htm
- Supplementary_HTM_tables/Supplementary_HTM_Table_92_miR1030_S01.htm
- Supplementary_HTM_tables/Supplementary_HTM_Table_93_miR1040_S01.htm
- Supplementary_HTM_tables/Supplementary_HTM_Table_94_miR1041_S01.htm
- Supplementary_HTM_tables/Supplementary_HTM_Table_95_miR1049_S01.htm
- Supplementary_HTM_tables/Supplementary_HTM_Table_96_miR1059_S01.htm
- Supplementary_HTM_tables/Supplementary_HTM_Table_97_miR1067_S01.htm
- Supplementary_HTM_tables/Supplementary_HTM_Table_98_miR1076_S02.htm
- Supplementary_HTM_tables/Supplementary_HTM_Table_99_miR1078_S01.htm
- Supplementary_HTM_tables/Supplementary_HTM_Table_9_miR162_S01.htm
