# Supplementary material for: The tomato genome sequence provides insights into fleshy fruit evolution
Source: Springer Nature journal article supplement (doi:10.1038/nature11119), 2012-05-01
Supplement: 41586_2012_BFnature11119_MOESM69_ESM.zip [file 41586_2012_BFnature11119_MOESM69_ESM.zip › Supplementary_HTM_tables/Supplementary_HTM_Table_1.htm]

|  |  |  |  |  |  |  |
| --- | --- | --- | --- | --- | --- | --- |
| miRNA family | SLY1 | SLY2 | SLY3 | STU1 | STU2 | STU3 |
 156\_S01 | 0 | 0 | 0 | 0 | 0 | 0 | 156\_S02 | 0 | 0 | 0 | 0 | 0 | 0 | 158\_S01 | 0 | 0 | 0 | 0 | 0 | 0 | 159\_S03 | 0 | 0 | 0 | 0 | 0 | 0 | 159\_S01 | 0 | 0 | 0 | 0 | 0 | 0 | 159\_S02 | 0 | 0 | 0 | 0 | 0 | 0 | 160\_S01 | 0 | 0 | 0 | 0 | 0 | 0 | 160\_S02 | 0 | 0 | 0 | 0 | 0 | 0 | 161\_S01 | 0 | 0 | 0 | 0 | 0 | 0 | 161\_S02 | 0 | 0 | 0 | 0 | 0 | 0 | 162\_S01 | 0 | 0 | 0 | 0 | 0 | 0 | 163\_S01 | 0 | 0 | 0 | 0 | 0 | 0 | 163\_S02 | 0 | 0 | 0 | 0 | 0 | 0 | 164\_S01 | 0 | 0 | 0 | 0 | 0 | 0 | 166\_S01 | 0 | 0 | 0 | 0 | 0 | 0 | 167\_S02 | 0 | 0 | 0 | 0 | 0 | 0 | 167\_S01 | 0 | 0 | 0 | 0 | 0 | 0 | 168\_S02 | 0 | 0 | 0 | 0 | 0 | 0 | 168\_S01 | 0 | 0 | 0 | 0 | 0 | 0 | 169\_S01 | 0 | 0 | 0 | 0 | 0 | 0 | 171\_S01 | 0 | 0 | 0 | 0 | 0 | 0 | 171\_S02 | 0 | 0 | 0 | 0 | 0 | 0 | 172\_S01 | 0 | 0 | 0 | 0 | 0 | 0 | 173\_S01 | 0 | 0 | 0 | 0 | 0 | 0 | 319\_S01 | 0 | 0 | 0 | 0 | 0 | 0 | 319\_S03 | 0 | 0 | 0 | 0 | 0 | 0 | 319\_S02 | 0 | 0 | 0 | 0 | 0 | 0 | 390\_S02 | 0 | 0 | 0 | 0 | 0 | 0 | 390\_S01 | 0 | 0 | 0 | 0 | 0 | 0 | 391\_S01 | 0 | 0 | 0 | 0 | 0 | 0 | 393\_S01 | 0 | 0 | 0 | 0 | 0 | 0 | 393\_S02 | 0 | 0 | 0 | 0 | 0 | 0 | 394\_S01 | 0 | 0 | 0 | 0 | 0 | 0 | 394\_S02 | 0 | 0 | 0 | 0 | 0 | 0 | 395\_S01 | 0 | 0 | 0 | 0 | 0 | 0 | 396\_S01 | 0 | 0 | 0 | 0 | 0 | 0 | 396\_S02 | 0 | 0 | 0 | 0 | 0 | 0 | 397\_S01 | 0 | 0 | 0 | 0 | 0 | 0 | 398\_S01 | 0 | 0 | 0 | 0 | 0 | 0 | 398\_S02 | 0 | 0 | 0 | 0 | 0 | 0 | 399\_S01 | 0 | 0 | 0 | 0 | 0 | 0 | 400\_S01 | 0 | 0 | 0 | 0 | 0 | 0 | 401\_S01 | 0 | 0 | 0 | 0 | 0 | 0 | 403\_S01 | 0 | 0 | 0 | 0 | 0 | 0 | 404\_S01 | 0 | 0 | 0 | 0 | 0 | 0 | 406\_S01 | 0 | 0 | 0 | 0 | 0 | 0 | 407\_S01 | 0 | 0 | 0 | 0 | 0 | 0 | 408\_S02 | 0 | 0 | 0 | 0 | 0 | 0 | 408\_S01 | 0 | 0 | 0 | 0 | 0 | 0 | 413\_S01 | 0 | 0 | 0 | 0 | 0 | 0 | 414\_S01 | 0 | 0 | 0 | 0 | 0 | 0 | 415\_S01 | 0 | 0 | 0 | 0 | 0 | 0 | 416\_S01 | 0 | 0 | 0 | 0 | 0 | 0 | 417\_S01 | 0 | 0 | 0 | 0 | 0 | 0 | 418\_S01 | 0 | 0 | 0 | 0 | 0 | 0 | 419\_S01 | 0 | 0 | 0 | 0 | 0 | 0 | 420\_S01 | 0 | 0 | 0 | 0 | 0 | 0 | 426\_S01 | 0 | 0 | 0 | 0 | 0 | 0 | 435\_S01 | 0 | 0 | 0 | 0 | 0 | 0 | 437\_S01 | 0 | 0 | 0 | 0 | 0 | 0 | 440\_S01 | 0 | 0 | 0 | 0 | 0 | 0 | 441\_S01 | 0 | 0 | 0 | 0 | 0 | 0 | 442\_S01 | 0 | 0 | 0 | 0 | 0 | 0 | 443\_S01 | 0 | 0 | 0 | 0 | 0 | 0 | 444\_S02 | 0 | 0 | 0 | 0 | 0 | 0 | 444\_S03 | 0 | 0 | 0 | 0 | 0 | 0 | 444\_S01 | 0 | 0 | 0 | 0 | 0 | 0 | 445\_S01 | 0 | 0 | 0 | 0 | 0 | 0 | 446\_S01 | 0 | 0 | 0 | 0 | 0 | 0 | 447\_S02 | 0 | 0 | 0 | 0 | 0 | 0 | 447\_S03 | 0 | 0 | 0 | 0 | 0 | 0 | 447\_S04 | 0 | 0 | 0 | 0 | 0 | 0 | 472\_S01 | 0 | 0 | 0 | 0 | 0 | 0 | 473\_S01 | 0 | 0 | 0 | 0 | 0 | 0 | 474\_S01 | 0 | 0 | 0 | 0 | 0 | 0 | 475\_S01 | 0 | 0 | 0 | 0 | 0 | 0 | 476\_S01 | 0 | 0 | 0 | 0 | 0 | 0 | 477\_S01 | 0 | 0 | 0 | 0 | 0 | 0 | 477\_S02 | 0 | 0 | 0 | 0 | 0 | 0 | 478\_S01 | 0 | 0 | 0 | 0 | 0 | 0 | 479\_S01 | 0 | 0 | 0 | 0 | 0 | 0 | 480\_S01 | 0 | 0 | 0 | 0 | 0 | 0 | 481\_S01 | 0 | 0 | 0 | 0 | 0 | 0 | 482\_S02 | 0 | 0 | 0 | 0 | 0 | 0 | 482\_S01 | 0 | 0 | 0 | 0 | 0 | 0 | 528\_S01 | 0 | 0 | 0 | 0 | 0 | 0 | 529\_S01 | 0 | 0 | 0 | 0 | 0 | 0 | 529\_S02 | 0 | 0 | 0 | 0 | 0 | 0 | 530\_S01 | 0 | 0 | 0 | 0 | 0 | 0 | 530\_S02 | 0 | 0 | 0 | 0 | 0 | 0 | 531\_S01 | 0 | 0 | 0 | 0 | 0 | 0 | 533\_S01 | 0 | 0 | 0 | 0 | 0 | 0 | 533\_S02 | 0 | 0 | 0 | 0 | 0 | 0 | 534\_S01 | 0 | 0 | 0 | 0 | 0 | 0 | 535\_S01 | 0 | 0 | 0 | 0 | 0 | 0 | 536\_S01 | 0 | 0 | 0 | 0 | 0 | 0 | 538\_S01 | 0 | 0 | 0 | 0 | 0 | 0 | 771\_S01 | 0 | 0 | 0 | 0 | 0 | 0 | 773\_S01 | 0 | 0 | 0 | 0 | 0 | 0 | 773\_S02 | 0 | 0 | 0 | 0 | 0 | 0 | 774\_S02 | 0 | 0 | 0 | 0 | 0 | 0 | 774\_S01 | 0 | 0 | 0 | 0 | 0 | 0 | 774\_S03 | 0 | 0 | 0 | 0 | 0 | 0 | 775\_S01 | 0 | 0 | 0 | 0 | 0 | 0 | 777\_S01 | 0 | 0 | 0 | 0 | 0 | 0 | 778\_S01 | 0 | 0 | 0 | 0 | 0 | 0 | 779\_S01 | 0 | 0 | 0 | 0 | 0 | 0 | 779\_S02 | 0 | 0 | 0 | 0 | 0 | 0 | 780\_S01 | 0 | 0 | 0 | 0 | 0 | 0 | 780\_S02 | 0 | 0 | 0 | 0 | 0 | 0 | 781\_S01 | 0 | 0 | 0 | 0 | 0 | 0 | 782\_S01 | 0 | 0 | 0 | 0 | 0 | 0 | 783\_S01 | 0 | 0 | 0 | 0 | 0 | 0 | 807\_S01 | 0 | 0 | 0 | 0 | 0 | 0 | 808\_S01 | 0 | 0 | 0 | 0 | 0 | 0 | 809\_S01 | 0 | 0 | 0 | 0 | 0 | 0 | 810\_S02 | 0 | 0 | 0 | 0 | 0 | 0 | 810\_S01 | 0 | 0 | 0 | 0 | 0 | 0 | 811\_S01 | 0 | 0 | 0 | 0 | 0 | 0 | 811\_S03 | 0 | 0 | 0 | 0 | 0 | 0 | 811\_S02 | 0 | 0 | 0 | 0 | 0 | 0 | 812\_S01 | 0 | 0 | 0 | 0 | 0 | 0 | 812\_S03 | 0 | 0 | 0 | 0 | 0 | 0 | 812\_S04 | 0 | 0 | 0 | 0 | 0 | 0 | 812\_S02 | 0 | 0 | 0 | 0 | 0 | 0 | 813\_S01 | 0 | 0 | 0 | 0 | 0 | 0 | 814\_S01 | 0 | 0 | 0 | 0 | 0 | 0 | 815\_S01 | 0 | 0 | 0 | 0 | 0 | 0 | 816\_S01 | 0 | 0 | 0 | 0 | 0 | 0 | 817\_S01 | 0 | 0 | 0 | 0 | 0 | 0 | 818\_S01 | 0 | 0 | 0 | 0 | 0 | 0 | 819\_S01 | 0 | 0 | 0 | 0 | 0 | 0 | 820\_S01 | 0 | 0 | 0 | 0 | 0 | 0 | 821\_S01 | 0 | 0 | 0 | 0 | 0 | 0 | 822\_S02 | 0 | 0 | 0 | 0 | 0 | 0 | 822\_S01 | 0 | 0 | 0 | 0 | 0 | 0 | 823\_S01 | 0 | 0 | 0 | 0 | 0 | 0 | 824\_S01 | 0 | 0 | 0 | 0 | 0 | 0 | 825\_S01 | 0 | 0 | 0 | 0 | 0 | 0 | 826\_S01 | 0 | 0 | 0 | 0 | 0 | 0 | 827\_S01 | 0 | 0 | 0 | 0 | 0 | 0 | 828\_S01 | 0 | 0 | 0 | 0 | 0 | 0 | 829\_S01 | 0 | 0 | 0 | 0 | 0 | 0 | 829\_S02 | 0 | 0 | 0 | 0 | 0 | 0 | 830\_S01 | 0 | 0 | 0 | 0 | 0 | 0 | 831\_S01 | 0 | 0 | 0 | 0 | 0 | 0 | 832\_S01 | 0 | 0 | 0 | 0 | 0 | 0 | 833\_S01 | 0 | 0 | 0 | 0 | 0 | 0 | 834\_S01 | 0 | 0 | 0 | 0 | 0 | 0 | 835\_S01 | 0 | 0 | 0 | 0 | 0 | 0 | 836\_S01 | 0 | 0 | 0 | 0 | 0 | 0 | 837\_S02 | 0 | 0 | 0 | 0 | 0 | 0 | 837\_S01 | 0 | 0 | 0 | 0 | 0 | 0 | 838\_S01 | 0 | 0 | 0 | 0 | 0 | 0 | 839\_S01 | 0 | 0 | 0 | 0 | 0 | 0 | 840\_S01 | 0 | 0 | 0 | 0 | 0 | 0 | 841\_S01 | 0 | 0 | 0 | 0 | 0 | 0 | 842\_S01 | 0 | 0 | 0 | 0 | 0 | 0 | 843\_S01 | 0 | 0 | 0 | 0 | 0 | 0 | 844\_S01 | 0 | 0 | 0 | 0 | 0 | 0 | 844\_S02 | 0 | 0 | 0 | 0 | 0 | 0 | 845\_S01 | 0 | 0 | 0 | 0 | 0 | 0 | 846\_S01 | 0 | 0 | 0 | 0 | 0 | 0 | 847\_S01 | 0 | 0 | 0 | 0 | 0 | 0 | 848\_S01 | 0 | 0 | 0 | 0 | 0 | 0 | 849\_S01 | 0 | 0 | 0 | 0 | 0 | 0 | 850\_S01 | 0 | 0 | 0 | 0 | 0 | 0 | 851\_S02 | 0 | 0 | 0 | 0 | 0 | 0 | 852\_S01 | 0 | 0 | 0 | 0 | 0 | 0 | 853\_S01 | 0 | 0 | 0 | 0 | 0 | 0 | 853\_S02 | 0 | 0 | 0 | 0 | 0 | 0 | 854\_S01 | 0 | 0 | 0 | 0 | 0 | 0 | 855\_S01 | 0 | 0 | 0 | 0 | 0 | 0 | 856\_S01 | 0 | 0 | 0 | 0 | 0 | 0 | 857\_S01 | 0 | 0 | 0 | 0 | 0 | 0 | 858\_S01 | 0 | 0 | 0 | 0 | 0 | 0 | 859\_S01 | 0 | 0 | 0 | 0 | 0 | 0 | 860\_S01 | 0 | 0 | 0 | 0 | 0 | 0 | 861\_S02 | 0 | 0 | 0 | 0 | 0 | 0 | 861\_S01 | 0 | 0 | 0 | 0 | 0 | 0 | 862\_S02 | 0 | 0 | 0 | 0 | 0 | 0 | 862\_S01 | 0 | 0 | 0 | 0 | 0 | 0 | 863\_S02 | 0 | 0 | 0 | 0 | 0 | 0 | 863\_S01 | 0 | 0 | 0 | 0 | 0 | 0 | 864\_S02 | 0 | 0 | 0 | 0 | 0 | 0 | 865\_S01 | 0 | 0 | 0 | 0 | 0 | 0 | 865\_S02 | 0 | 0 | 0 | 0 | 0 | 0 | 866\_S01 | 0 | 0 | 0 | 0 | 0 | 0 | 866\_S02 | 0 | 0 | 0 | 0 | 0 | 0 | 867\_S01 | 0 | 0 | 0 | 0 | 0 | 0 | 868\_S02 | 0 | 0 | 0 | 0 | 0 | 0 | 869\_S01 | 0 | 0 | 0 | 0 | 0 | 0 | 869\_S02 | 0 | 0 | 0 | 0 | 0 | 0 | 870\_S01 | 0 | 0 | 0 | 0 | 0 | 0 | 893\_S01 | 0 | 0 | 0 | 0 | 0 | 0 | 894\_S01 | 0 | 0 | 0 | 0 | 0 | 0 | 897\_S01 | 0 | 0 | 0 | 0 | 0 | 0 | 899\_S01 | 0 | 0 | 0 | 0 | 0 | 0 | 900\_S01 | 0 | 0 | 0 | 0 | 0 | 0 | 901\_S01 | 0 | 0 | 0 | 0 | 0 | 0 | 902\_S01 | 0 | 0 | 0 | 0 | 0 | 0 | 902\_S02 | 0 | 0 | 0 | 0 | 0 | 0 | 903\_S01 | 0 | 0 | 0 | 0 | 0 | 0 | 904\_S01 | 0 | 0 | 0 | 0 | 0 | 0 | 905\_S01 | 0 | 0 | 0 | 0 | 0 | 0 | 907\_S01 | 0 | 0 | 0 | 0 | 0 | 0 | 908\_S03 | 0 | 0 | 0 | 0 | 0 | 0 | 908\_S01 | 0 | 0 | 0 | 0 | 0 | 0 | 908\_S02 | 0 | 0 | 0 | 0 | 0 | 0 | 909\_S02 | 0 | 0 | 0 | 0 | 0 | 0 | 909\_S01 | 0 | 0 | 0 | 0 | 0 | 0 | 909\_S03 | 0 | 0 | 0 | 0 | 0 | 0 | 910\_S01 | 0 | 0 | 0 | 0 | 0 | 0 | 911\_S01 | 0 | 0 | 0 | 0 | 0 | 0 | 912\_S01 | 0 | 0 | 0 | 0 | 0 | 0 | 913\_S01 | 0 | 0 | 0 | 0 | 0 | 0 | 914\_S01 | 0 | 0 | 0 | 0 | 0 | 0 | 916\_S01 | 0 | 0 | 0 | 0 | 0 | 0 | 917\_S01 | 0 | 0 | 0 | 0 | 0 | 0 | 918\_S01 | 0 | 0 | 0 | 0 | 0 | 0 | 919\_S01 | 0 | 0 | 0 | 0 | 0 | 0 | 919\_S02 | 0 | 0 | 0 | 0 | 0 | 0 | 946\_S01 | 0 | 0 | 0 | 0 | 0 | 0 | 947\_S01 | 0 | 0 | 0 | 0 | 0 | 0 | 948\_S01 | 0 | 0 | 0 | 0 | 0 | 0 | 949\_S01 | 0 | 0 | 0 | 0 | 0 | 0 | 950\_S01 | 0 | 0 | 0 | 0 | 0 | 0 | 950\_S02 | 0 | 0 | 0 | 0 | 0 | 0 | 951\_S01 | 0 | 0 | 0 | 0 | 0 | 0 | 952\_S01 | 0 | 0 | 0 | 0 | 0 | 0 | 1023\_S02 | 0 | 0 | 0 | 0 | 0 | 0 | 1023\_S01 | 0 | 0 | 0 | 0 | 0 | 0 | 1024\_S01 | 0 | 0 | 0 | 0 | 0 | 0 | 1025\_S01 | 0 | 0 | 0 | 0 | 0 | 0 | 1026\_S01 | 0 | 0 | 0 | 0 | 0 | 0 | 1027\_S01 | 0 | 0 | 0 | 0 | 0 | 0 | 1028\_S01 | 0 | 0 | 0 | 0 | 0 | 0 | 1028\_S02 | 0 | 0 | 0 | 0 | 0 | 0 | 1029\_S01 | 0 | 0 | 0 | 0 | 0 | 0 | 1030\_S01 | 0 | 0 | 0 | 0 | 0 | 0 | 1031\_S01 | 0 | 0 | 0 | 0 | 0 | 0 | 1032\_S01 | 0 | 0 | 0 | 0 | 0 | 0 | 1033\_S01 | 0 | 0 | 0 | 0 | 0 | 0 | 1035\_S01 | 0 | 0 | 0 | 0 | 0 | 0 | 1036\_S02 | 0 | 0 | 0 | 0 | 0 | 0 | 1036\_S01 | 0 | 0 | 0 | 0 | 0 | 0 | 1037\_S01 | 0 | 0 | 0 | 0 | 0 | 0 | 1038\_S02 | 0 | 0 | 0 | 0 | 0 | 0 | 1039\_S02 | 0 | 0 | 0 | 0 | 0 | 0 | 1039\_S01 | 0 | 0 | 0 | 0 | 0 | 0 | 1040\_S01 | 0 | 0 | 0 | 0 | 0 | 0 | 1041\_S01 | 0 | 0 | 0 | 0 | 0 | 0 | 1042\_S01 | 0 | 0 | 0 | 0 | 0 | 0 | 1043\_S01 | 0 | 0 | 0 | 0 | 0 | 0 | 1043\_S02 | 0 | 0 | 0 | 0 | 0 | 0 | 1044\_S01 | 0 | 0 | 0 | 0 | 0 | 0 | 1044\_S02 | 0 | 0 | 0 | 0 | 0 | 0 | 1045\_S01 | 0 | 0 | 0 | 0 | 0 | 0 | 1046\_S02 | 0 | 0 | 0 | 0 | 0 | 0 | 1046\_S01 | 0 | 0 | 0 | 0 | 0 | 0 | 1047\_S02 | 0 | 0 | 0 | 0 | 0 | 0 | 1048\_S01 | 0 | 0 | 0 | 0 | 0 | 0 | 1049\_S01 | 0 | 0 | 0 | 0 | 0 | 0 | 1050\_S01 | 0 | 0 | 0 | 0 | 0 | 0 | 1051\_S01 | 0 | 0 | 0 | 0 | 0 | 0 | 1052\_S01 | 0 | 0 | 0 | 0 | 0 | 0 | 1053\_S01 | 0 | 0 | 0 | 0 | 0 | 0 | 1053\_S02 | 0 | 0 | 0 | 0 | 0 | 0 | 1054\_S01 | 0 | 0 | 0 | 0 | 0 | 0 | 1055\_S01 | 0 | 0 | 0 | 0 | 0 | 0 | 1057\_S01 | 0 | 0 | 0 | 0 | 0 | 0 | 1058\_S01 | 0 | 0 | 0 | 0 | 0 | 0 | 1059\_S01 | 0 | 0 | 0 | 0 | 0 | 0 | 1060\_S01 | 0 | 0 | 0 | 0 | 0 | 0 | 1061\_S01 | 0 | 0 | 0 | 0 | 0 | 0 | 1061\_S02 | 0 | 0 | 0 | 0 | 0 | 0 | 1062\_S01 | 0 | 0 | 0 | 0 | 0 | 0 | 1063\_S01 | 0 | 0 | 0 | 0 | 0 | 0 | 1064\_S01 | 0 | 0 | 0 | 0 | 0 | 0 | 1065\_S01 | 0 | 0 | 0 | 0 | 0 | 0 | 1067\_S01 | 0 | 0 | 0 | 0 | 0 | 0 | 1069\_S02 | 0 | 0 | 0 | 0 | 0 | 0 | 1069\_S01 | 0 | 0 | 0 | 0 | 0 | 0 | 1070\_S01 | 0 | 0 | 0 | 0 | 0 | 0 | 1071\_S02 | 0 | 0 | 0 | 0 | 0 | 0 | 1072\_S01 | 0 | 0 | 0 | 0 | 0 | 0 | 1073\_S02 | 0 | 0 | 0 | 0 | 0 | 0 | 1074\_S01 | 0 | 0 | 0 | 0 | 0 | 0 | 1075\_S01 | 0 | 0 | 0 | 0 | 0 | 0 | 1076\_S02 | 0 | 0 | 0 | 0 | 0 | 0 | 1077\_S02 | 0 | 0 | 0 | 0 | 0 | 0 | 1077\_S01 | 0 | 0 | 0 | 0 | 0 | 0 | 1078\_S01 | 0 | 0 | 0 | 0 | 0 | 0 | 1079\_S01 | 0 | 0 | 0 | 0 | 0 | 0 | 1079\_S02 | 0 | 0 | 0 | 0 | 0 | 0 | 1080\_S01 | 0 | 0 | 0 | 0 | 0 | 0 | 1081\_S01 | 0 | 0 | 0 | 0 | 0 | 0 | 1082\_S01 | 0 | 0 | 0 | 0 | 0 | 0 | 1083\_S01 | 0 | 0 | 0 | 0 | 0 | 0 | 1084\_S01 | 0 | 0 | 0 | 0 | 0 | 0 | 1085\_S02 | 0 | 0 | 0 | 0 | 0 | 0 | 1085\_S01 | 0 | 0 | 0 | 0 | 0 | 0 | 1087\_S01 | 0 | 0 | 0 | 0 | 0 | 0 | 1088\_S02 | 0 | 0 | 0 | 0 | 0 | 0 | 1088\_S01 | 0 | 0 | 0 | 0 | 0 | 0 | 1089\_S01 | 0 | 0 | 0 | 0 | 0 | 0 | 1090\_S01 | 0 | 0 | 0 | 0 | 0 | 0 | 1091\_S01 | 0 | 0 | 0 | 0 | 0 | 0 | 1092\_S01 | 0 | 0 | 0 | 0 | 0 | 0 | 1093\_S01 | 0 | 0 | 0 | 0 | 0 | 0 | 1094\_S01 | 0 | 0 | 0 | 0 | 0 | 0 | 1097\_S01 | 0 | 0 | 0 | 0 | 0 | 0 | 1098\_S01 | 0 | 0 | 0 | 0 | 0 | 0 | 1099\_S01 | 0 | 0 | 0 | 0 | 0 | 0 | 1100\_S01 | 0 | 0 | 0 | 0 | 0 | 0 | 1101\_S02 | 0 | 0 | 0 | 0 | 0 | 0 | 1101\_S01 | 0 | 0 | 0 | 0 | 0 | 0 | 1102\_S01 | 0 | 0 | 0 | 0 | 0 | 0 | 1103\_S02 | 0 | 0 | 0 | 0 | 0 | 0 | 1104\_S01 | 0 | 0 | 0 | 0 | 0 | 0 | 1105\_S01 | 0 | 0 | 0 | 0 | 0 | 0 | 1106\_S01 | 0 | 0 | 0 | 0 | 0 | 0 | 1108\_S01 | 0 | 0 | 0 | 0 | 0 | 0 | 1109\_S01 | 0 | 0 | 0 | 0 | 0 | 0 | 1110\_S01 | 0 | 0 | 0 | 0 | 0 | 0 | 1111\_S01 | 0 | 0 | 0 | 0 | 0 | 0 | 1112\_S02 | 0 | 0 | 0 | 0 | 0 | 0 | 1112\_S01 | 0 | 0 | 0 | 0 | 0 | 0 | 1114\_S01 | 0 | 0 | 0 | 0 | 0 | 0 | 1115\_S01 | 0 | 0 | 0 | 0 | 0 | 0 | 1117\_S01 | 0 | 0 | 0 | 0 | 0 | 0 | 1118\_S01 | 0 | 0 | 0 | 0 | 0 | 0 | 1119\_S01 | 0 | 0 | 0 | 0 | 0 | 0 | 1120\_S01 | 0 | 0 | 0 | 0 | 0 | 0 | 1121\_S01 | 0 | 0 | 0 | 0 | 0 | 0 | 1122\_S01 | 0 | 0 | 0 | 0 | 0 | 0 | 1123\_S01 | 0 | 0 | 0 | 0 | 0 | 0 | 1124\_S01 | 0 | 0 | 0 | 0 | 0 | 0 | 1125\_S01 | 0 | 0 | 0 | 0 | 0 | 0 | 1126\_S01 | 0 | 0 | 0 | 0 | 0 | 0 | 1127\_S01 | 0 | 0 | 0 | 0 | 0 | 0 | 1128\_S01 | 0 | 0 | 0 | 0 | 0 | 0 | 1130\_S01 | 0 | 0 | 0 | 0 | 0 | 0 | 1131\_S01 | 0 | 0 | 0 | 0 | 0 | 0 | 1132\_S01 | 0 | 0 | 0 | 0 | 0 | 0 | 1133\_S01 | 0 | 0 | 0 | 0 | 0 | 0 | 1134\_S01 | 0 | 0 | 0 | 0 | 0 | 0 | 1135\_S01 | 0 | 0 | 0 | 0 | 0 | 0 | 1136\_S01 | 0 | 0 | 0 | 0 | 0 | 0 | 1137\_S01 | 0 | 0 | 0 | 0 | 0 | 0 | 1139\_S01 | 0 | 0 | 0 | 0 | 0 | 0 | 1142\_S01 | 0 | 0 | 0 | 0 | 0 | 0 | 1144\_S02 | 0 | 0 | 0 | 0 | 0 | 0 | 1144\_S03 | 0 | 0 | 0 | 0 | 0 | 0 | 1144\_S01 | 0 | 0 | 0 | 0 | 0 | 0 | 1145\_S02 | 0 | 0 | 0 | 0 | 0 | 0 | 1146\_S01 | 0 | 0 | 0 | 0 | 0 | 0 | 1147\_S01 | 0 | 0 | 0 | 0 | 0 | 0 | 1147\_S02 | 0 | 0 | 0 | 0 | 0 | 0 | 1148\_S02 | 0 | 0 | 0 | 0 | 0 | 0 | 1148\_S01 | 0 | 0 | 0 | 0 | 0 | 0 | 1149\_S01 | 0 | 0 | 0 | 0 | 0 | 0 | 1149\_S02 | 0 | 0 | 0 | 0 | 0 | 0 | 1150\_S03 | 0 | 0 | 0 | 0 | 0 | 0 | 1150\_S01 | 0 | 0 | 0 | 0 | 0 | 0 | 1152\_S01 | 0 | 0 | 0 | 0 | 0 | 0 | 1153\_S01 | 0 | 0 | 0 | 0 | 0 | 0 | 1153\_S02 | 0 | 0 | 0 | 0 | 0 | 0 | 1154\_S01 | 0 | 0 | 0 | 0 | 0 | 0 | 1155\_S01 | 0 | 0 | 0 | 0 | 0 | 0 | 1156\_S02 | 0 | 0 | 0 | 0 | 0 | 0 | 1156\_S01 | 0 | 0 | 0 | 0 | 0 | 0 | 1157\_S01 | 0 | 0 | 0 | 0 | 0 | 0 | 1158\_S01 | 0 | 0 | 0 | 0 | 0 | 0 | 1159\_S02 | 0 | 0 | 0 | 0 | 0 | 0 | 1160\_S03 | 0 | 0 | 0 | 0 | 0 | 0 | 1160\_S02 | 0 | 0 | 0 | 0 | 0 | 0 | 1161\_S01 | 0 | 0 | 0 | 0 | 0 | 0 | 1162\_S01 | 0 | 0 | 0 | 0 | 0 | 0 | 1163\_S01 | 0 | 0 | 0 | 0 | 0 | 0 | 1164\_S01 | 0 | 0 | 0 | 0 | 0 | 0 | 1165\_S01 | 0 | 0 | 0 | 0 | 0 | 0 | 1166\_S01 | 0 | 0 | 0 | 0 | 0 | 0 | 1166\_S02 | 0 | 0 | 0 | 0 | 0 | 0 | 1167\_S01 | 0 | 0 | 0 | 0 | 0 | 0 | 1168\_S01 | 0 | 0 | 0 | 0 | 0 | 0 | 1168\_S02 | 0 | 0 | 0 | 0 | 0 | 0 | 1169\_S01 | 0 | 0 | 0 | 0 | 0 | 0 | 1170\_S02 | 0 | 0 | 0 | 0 | 0 | 0 | 1171\_S01 | 0 | 0 | 0 | 0 | 0 | 0 | 1172\_S01 | 0 | 0 | 0 | 0 | 0 | 0 | 1172\_S02 | 0 | 0 | 0 | 0 | 0 | 0 | 1173\_S01 | 0 | 0 | 0 | 0 | 0 | 0 | 1212\_S01 | 0 | 0 | 0 | 0 | 0 | 0 | 1214\_S01 | 0 | 0 | 0 | 0 | 0 | 0 | 1215\_S01 | 0 | 0 | 0 | 0 | 0 | 0 | 1216\_S01 | 0 | 0 | 0 | 0 | 0 | 0 | 1217\_S02 | 0 | 0 | 0 | 0 | 0 | 0 | 1217\_S01 | 0 | 0 | 0 | 0 | 0 | 0 | 1218\_S01 | 0 | 0 | 0 | 0 | 0 | 0 | 1220\_S01 | 0 | 0 | 0 | 0 | 0 | 0 | 1221\_S01 | 0 | 0 | 0 | 0 | 0 | 0 | 1221\_S02 | 0 | 0 | 0 | 0 | 0 | 0 | 1222\_S01 | 0 | 0 | 0 | 0 | 0 | 0 | 1223\_S01 | 0 | 0 | 0 | 0 | 0 | 0 | 1309\_S01 | 0 | 0 | 0 | 0 | 0 | 0 | 1310\_S01 | 0 | 0 | 0 | 0 | 0 | 0 | 1311\_S01 | 0 | 0 | 0 | 0 | 0 | 0 | 1312\_S01 | 0 | 0 | 0 | 0 | 0 | 0 | 1313\_S01 | 0 | 0 | 0 | 0 | 0 | 0 | 1314\_S01 | 0 | 0 | 0 | 0 | 0 | 0 | 1315\_S01 | 0 | 0 | 0 | 0 | 0 | 0 | 1316\_S01 | 0 | 0 | 0 | 0 | 0 | 0 | 1317\_S02 | 0 | 0 | 0 | 0 | 0 | 0 | 1318\_S01 | 0 | 0 | 0 | 0 | 0 | 0 | 1320\_S01 | 0 | 0 | 0 | 0 | 0 | 0 | 1320\_S02 | 0 | 0 | 0 | 0 | 0 | 0 | 1423\_S02 | 0 | 0 | 0 | 0 | 0 | 0 | 1424\_S01 | 0 | 0 | 0 | 0 | 0 | 0 | 1425\_S01 | 0 | 0 | 0 | 0 | 0 | 0 | 1426\_S01 | 0 | 0 | 0 | 0 | 0 | 0 | 1427\_S01 | 0 | 0 | 0 | 0 | 0 | 0 | 1428\_S01 | 0 | 0 | 0 | 0 | 0 | 0 | 1428\_S03 | 0 | 0 | 0 | 0 | 0 | 0 | 1429\_S02 | 0 | 0 | 0 | 0 | 0 | 0 | 1430\_S01 | 0 | 0 | 0 | 0 | 0 | 0 | 1431\_S01 | 0 | 0 | 0 | 0 | 0 | 0 | 1432\_S01 | 0 | 0 | 0 | 0 | 0 | 0 | 1433\_S01 | 0 | 0 | 0 | 0 | 0 | 0 | 1435\_S01 | 0 | 0 | 0 | 0 | 0 | 0 | 1436\_S01 | 0 | 0 | 0 | 0 | 0 | 0 | 1437\_S01 | 0 | 0 | 0 | 0 | 0 | 0 | 1438\_S01 | 0 | 0 | 0 | 0 | 0 | 0 | 1439\_S01 | 0 | 0 | 0 | 0 | 0 | 0 | 1441\_S01 | 0 | 0 | 0 | 0 | 0 | 0 | 1442\_S01 | 0 | 0 | 0 | 0 | 0 | 0 | 1444\_S01 | 0 | 0 | 0 | 0 | 0 | 0 | 1445\_S01 | 0 | 0 | 0 | 0 | 0 | 0 | 1446\_S01 | 0 | 0 | 0 | 0 | 0 | 0 | 1447\_S01 | 0 | 0 | 0 | 0 | 0 | 0 | 1448\_S01 | 0 | 0 | 0 | 0 | 0 | 0 | 1449\_S01 | 0 | 0 | 0 | 0 | 0 | 0 | 1450\_S01 | 0 | 0 | 0 | 0 | 0 | 0 | 1507\_S01 | 0 | 0 | 0 | 0 | 0 | 0 | 1508\_S01 | 0 | 0 | 0 | 0 | 0 | 0 | 1509\_S01 | 0 | 0 | 0 | 0 | 0 | 0 | 1510\_S02 | 0 | 0 | 0 | 0 | 0 | 0 | 1510\_S01 | 0 | 0 | 0 | 0 | 0 | 0 | 1510\_S03 | 0 | 0 | 0 | 0 | 0 | 0 | 1511\_S01 | 0 | 0 | 0 | 0 | 0 | 0 | 1512\_S01 | 0 | 0 | 0 | 0 | 0 | 0 | 1513\_S01 | 0 | 0 | 0 | 0 | 0 | 0 | 1514\_S01 | 0 | 0 | 0 | 0 | 0 | 0 | 1515\_S01 | 0 | 0 | 0 | 0 | 0 | 0 | 1516\_S01 | 0 | 0 | 0 | 0 | 0 | 0 | 1517\_S01 | 0 | 0 | 0 | 0 | 0 | 0 | 1518\_S01 | 0 | 0 | 0 | 0 | 0 | 0 | 1519\_S01 | 0 | 0 | 0 | 0 | 0 | 0 | 1520\_S05 | 0 | 0 | 0 | 0 | 0 | 0 | 1520\_S03 | 0 | 0 | 0 | 0 | 0 | 0 | 1520\_S02 | 0 | 0 | 0 | 0 | 0 | 0 | 1520\_S01 | 0 | 0 | 0 | 0 | 0 | 0 | 1520\_S04 | 0 | 0 | 0 | 0 | 0 | 0 | 1521\_S01 | 0 | 0 | 0 | 0 | 0 | 0 | 1522\_S01 | 0 | 0 | 0 | 0 | 0 | 0 | 1523\_S01 | 0 | 0 | 0 | 0 | 0 | 0 | 1524\_S01 | 0 | 0 | 0 | 0 | 0 | 0 | 1525\_S01 | 0 | 0 | 0 | 0 | 0 | 0 | 1526\_S01 | 0 | 0 | 0 | 0 | 0 | 0 | 1527\_S01 | 0 | 0 | 0 | 0 | 0 | 0 | 1528\_S01 | 0 | 0 | 0 | 0 | 0 | 0 | 1529\_S01 | 0 | 0 | 0 | 0 | 0 | 0 | 1530\_S01 | 0 | 0 | 0 | 0 | 0 | 0 | 1531\_S01 | 0 | 0 | 0 | 0 | 0 | 0 | 1532\_S01 | 0 | 0 | 0 | 0 | 0 | 0 | 1533\_S01 | 0 | 0 | 0 | 0 | 0 | 0 | 1534\_S01 | 0 | 0 | 0 | 0 | 0 | 0 | 1535\_S01 | 0 | 0 | 0 | 0 | 0 | 0 | 1536\_S01 | 0 | 0 | 0 | 0 | 0 | 0 | 1846\_S03 | 0 | 0 | 0 | 0 | 0 | 0 | 1846\_S01 | 0 | 0 | 0 | 0 | 0 | 0 | 1846\_S02 | 0 | 0 | 0 | 0 | 0 | 0 | 1846\_S04 | 0 | 0 | 0 | 0 | 0 | 0 | 1847\_S02 | 0 | 0 | 0 | 0 | 0 | 0 | 1847\_S01 | 0 | 0 | 0 | 0 | 0 | 0 | 1848\_S01 | 0 | 0 | 0 | 0 | 0 | 0 | 1849\_S01 | 0 | 0 | 0 | 0 | 0 | 0 | 1850\_S03 | 0 | 0 | 0 | 0 | 0 | 0 | 1850\_S01 | 0 | 0 | 0 | 0 | 0 | 0 | 1850\_S02 | 0 | 0 | 0 | 0 | 0 | 0 | 1851\_S01 | 0 | 0 | 0 | 0 | 0 | 0 | 1852\_S01 | 0 | 0 | 0 | 0 | 0 | 0 | 1853\_S01 | 0 | 0 | 0 | 0 | 0 | 0 | 1853\_S02 | 0 | 0 | 0 | 0 | 0 | 0 | 1854\_S02 | 0 | 0 | 0 | 0 | 0 | 0 | 1854\_S01 | 0 | 0 | 0 | 0 | 0 | 0 | 1855\_S01 | 0 | 0 | 0 | 0 | 0 | 0 | 1856\_S01 | 0 | 0 | 0 | 0 | 0 | 0 | 1857\_S01 | 0 | 0 | 0 | 0 | 0 | 0 | 1858\_S01 | 0 | 0 | 0 | 0 | 0 | 0 | 1859\_S01 | 0 | 0 | 0 | 0 | 0 | 0 | 1860\_S01 | 0 | 0 | 0 | 0 | 0 | 0 | 1860\_S02 | 0 | 0 | 0 | 0 | 0 | 0 | 1861\_S01 | 0 | 0 | 0 | 0 | 0 | 0 | 1862\_S01 | 0 | 0 | 0 | 0 | 0 | 0 | 1863\_S02 | 0 | 0 | 0 | 0 | 0 | 0 | 1863\_S01 | 0 | 0 | 0 | 0 | 0 | 0 | 1864\_S01 | 0 | 0 | 0 | 0 | 0 | 0 | 1865\_S02 | 0 | 0 | 0 | 0 | 0 | 0 | 1865\_S01 | 0 | 0 | 0 | 0 | 0 | 0 | 1866\_S01 | 0 | 0 | 0 | 0 | 0 | 0 | 1866\_S02 | 0 | 0 | 0 | 0 | 0 | 0 | 1867\_S01 | 0 | 0 | 0 | 0 | 0 | 0 | 1868\_S01 | 0 | 0 | 0 | 0 | 0 | 0 | 1869\_S01 | 0 | 0 | 0 | 0 | 0 | 0 | 1870\_S02 | 0 | 0 | 0 | 0 | 0 | 0 | 1870\_S01 | 0 | 0 | 0 | 0 | 0 | 0 | 1871\_S01 | 0 | 0 | 0 | 0 | 0 | 0 | 1872\_S01 | 0 | 0 | 0 | 0 | 0 | 0 | 1873\_S01 | 0 | 0 | 0 | 0 | 0 | 0 | 1874\_S02 | 0 | 0 | 0 | 0 | 0 | 0 | 1874\_S01 | 0 | 0 | 0 | 0 | 0 | 0 | 1875\_S01 | 0 | 0 | 0 | 0 | 0 | 0 | 1876\_S01 | 0 | 0 | 0 | 0 | 0 | 0 | 1877\_S01 | 0 | 0 | 0 | 0 | 0 | 0 | 1878\_S01 | 0 | 0 | 0 | 0 | 0 | 0 | 1878\_S02 | 0 | 0 | 0 | 0 | 0 | 0 | 1879\_S01 | 0 | 0 | 0 | 0 | 0 | 0 | 1880\_S01 | 0 | 0 | 0 | 0 | 0 | 0 | 1881\_S01 | 0 | 0 | 0 | 0 | 0 | 0 | 1883\_S01 | 0 | 0 | 0 | 0 | 0 | 0 | 1884\_S01 | 0 | 0 | 0 | 0 | 0 | 0 | 1885\_S01 | 0 | 0 | 0 | 0 | 0 | 0 | 1886\_S03 | 0 | 0 | 0 | 0 | 0 | 0 | 1886\_S02 | 0 | 0 | 0 | 0 | 0 | 0 | 1886\_S01 | 0 | 0 | 0 | 0 | 0 | 0 | 1887\_S01 | 0 | 0 | 0 | 0 | 0 | 0 | 1888\_S01 | 0 | 0 | 0 | 0 | 0 | 0 | 1916\_S01 | 0 | 0 | 0 | 0 | 0 | 0 | 1917\_S01 | 0 | 0 | 0 | 0 | 0 | 0 | 1918\_S01 | 0 | 0 | 0 | 0 | 0 | 0 | 1919\_S01 | 0 | 0 | 0 | 0 | 0 | 0 | 2055\_S01 | 0 | 0 | 0 | 0 | 0 | 0 | 2077\_S01 | 0 | 0 | 0 | 0 | 0 | 0 | 2078\_S01 | 0 | 0 | 0 | 0 | 0 | 0 | 2079\_S01 | 0 | 0 | 0 | 0 | 0 | 0 | 2081\_S01 | 0 | 0 | 0 | 0 | 0 | 0 | 2082\_S01 | 0 | 0 | 0 | 0 | 0 | 0 | 2083\_S02 | 0 | 0 | 0 | 0 | 0 | 0 | 2084\_S01 | 0 | 0 | 0 | 0 | 0 | 0 | 2085\_S01 | 0 | 0 | 0 | 0 | 0 | 0 | 2086\_S01 | 0 | 0 | 0 | 0 | 0 | 0 | 2087\_S01 | 0 | 0 | 0 | 0 | 0 | 0 | 2088\_S01 | 0 | 0 | 0 | 0 | 0 | 0 | 2088\_S02 | 0 | 0 | 0 | 0 | 0 | 0 | 2089\_S01 | 0 | 0 | 0 | 0 | 0 | 0 | 2090\_S01 | 0 | 0 | 0 | 0 | 0 | 0 | 2091\_S01 | 0 | 0 | 0 | 0 | 0 | 0 | 2091\_S02 | 0 | 0 | 0 | 0 | 0 | 0 | 2092\_S02 | 0 | 0 | 0 | 0 | 0 | 0 | 2092\_S01 | 0 | 0 | 0 | 0 | 0 | 0 | 2093\_S01 | 0 | 0 | 0 | 0 | 0 | 0 | 2094\_S01 | 0 | 0 | 0 | 0 | 0 | 0 | 2094\_S02 | 0 | 0 | 0 | 0 | 0 | 0 | 2095\_S01 | 0 | 0 | 0 | 0 | 0 | 0 | 2095\_S02 | 0 | 0 | 0 | 0 | 0 | 0 | 2096\_S01 | 0 | 0 | 0 | 0 | 0 | 0 | 2096\_S02 | 0 | 0 | 0 | 0 | 0 | 0 | 2097\_S02 | 0 | 0 | 0 | 0 | 0 | 0 | 2097\_S01 | 0 | 0 | 0 | 0 | 0 | 0 | 2098\_S01 | 0 | 0 | 0 | 0 | 0 | 0 | 2099\_S02 | 0 | 0 | 0 | 0 | 0 | 0 | 2099\_S01 | 0 | 0 | 0 | 0 | 0 | 0 | 2100\_S01 | 0 | 0 | 0 | 0 | 0 | 0 | 2100\_S02 | 0 | 0 | 0 | 0 | 0 | 0 | 2101\_S02 | 0 | 0 | 0 | 0 | 0 | 0 | 2102\_S02 | 0 | 0 | 0 | 0 | 0 | 0 | 2102\_S01 | 0 | 0 | 0 | 0 | 0 | 0 | 2105\_S01 | 0 | 0 | 0 | 0 | 0 | 0 | 2107\_S01 | 0 | 0 | 0 | 0 | 0 | 0 | 2108\_S01 | 0 | 0 | 0 | 0 | 0 | 0 | 2109\_S01 | 0 | 0 | 0 | 0 | 0 | 0 | 2111\_S01 | 0 | 0 | 0 | 0 | 0 | 0 | 2111\_S02 | 0 | 0 | 0 | 0 | 0 | 0 | 2112\_S02 | 0 | 0 | 0 | 0 | 0 | 0 | 2112\_S01 | 0 | 0 | 0 | 0 | 0 | 0 | 2118\_S01 | 0 | 0 | 0 | 0 | 0 | 0 | 2119\_S01 | 0 | 0 | 0 | 0 | 0 | 0 | 2120\_S01 | 0 | 0 | 0 | 0 | 0 | 0 | 2121\_S01 | 0 | 0 | 0 | 0 | 0 | 0 | 2122\_S01 | 0 | 0 | 0 | 0 | 0 | 0 | 2123\_S01 | 0 | 0 | 0 | 0 | 0 | 0 | 2124\_S01 | 0 | 0 | 0 | 0 | 0 | 0 | 2125\_S01 | 0 | 0 | 0 | 0 | 0 | 0 | 2199\_S01 | 0 | 0 | 0 | 0 | 0 | 0 | 2275\_S02 | 0 | 0 | 0 | 0 | 0 | 0 | 2275\_S01 | 0 | 0 | 0 | 0 | 0 | 0 | 2585\_S01 | 0 | 0 | 0 | 0 | 0 | 0 | 2586\_S01 | 0 | 0 | 0 | 0 | 0 | 0 | 2587\_S01 | 0 | 0 | 0 | 0 | 0 | 0 | 2588\_S01 | 0 | 0 | 0 | 0 | 0 | 0 | 2589\_S01 | 0 | 0 | 0 | 0 | 0 | 0 | 2590\_S01 | 0 | 0 | 0 | 0 | 0 | 0 | 2591\_S01 | 0 | 0 | 0 | 0 | 0 | 0 | 2592\_S01 | 0 | 0 | 0 | 0 | 0 | 0 | 2593\_S01 | 0 | 0 | 0 | 0 | 0 | 0 | 2594\_S01 | 0 | 0 | 0 | 0 | 0 | 0 | 2595\_S01 | 0 | 0 | 0 | 0 | 0 | 0 | 2596\_S01 | 0 | 0 | 0 | 0 | 0 | 0 | 2597\_S01 | 0 | 0 | 0 | 0 | 0 | 0 | 2598\_S01 | 0 | 0 | 0 | 0 | 0 | 0 | 2599\_S01 | 0 | 0 | 0 | 0 | 0 | 0 | 2600\_S01 | 0 | 0 | 0 | 0 | 0 | 0 | 2601\_S01 | 0 | 0 | 0 | 0 | 0 | 0 | 2602\_S01 | 0 | 0 | 0 | 0 | 0 | 0 | 2603\_S01 | 0 | 0 | 0 | 0 | 0 | 0 | 2604\_S01 | 0 | 0 | 0 | 0 | 0 | 0 | 2605\_S01 | 0 | 0 | 0 | 0 | 0 | 0 | 2606\_S01 | 0 | 0 | 0 | 0 | 0 | 0 | 2607\_S01 | 0 | 0 | 0 | 0 | 0 | 0 | 2608\_S01 | 0 | 0 | 0 | 0 | 0 | 0 | 2609\_S01 | 0 | 0 | 0 | 0 | 0 | 0 | 2610\_S01 | 0 | 0 | 0 | 0 | 0 | 0 | 2611\_S01 | 0 | 0 | 0 | 0 | 0 | 0 | 2612\_S01 | 0 | 0 | 0 | 0 | 0 | 0 | 2613\_S01 | 0 | 0 | 0 | 0 | 0 | 0 | 2614\_S01 | 0 | 0 | 0 | 0 | 0 | 0 | 2616\_S01 | 0 | 0 | 0 | 0 | 0 | 0 | 2617\_S01 | 0 | 0 | 0 | 0 | 0 | 0 | 2618\_S01 | 0 | 0 | 0 | 0 | 0 | 0 | 2619\_S01 | 0 | 0 | 0 | 0 | 0 | 0 | 2620\_S01 | 0 | 0 | 0 | 0 | 0 | 0 | 2621\_S01 | 0 | 0 | 0 | 0 | 0 | 0 | 2622\_S01 | 0 | 0 | 0 | 0 | 0 | 0 | 2623\_S01 | 0 | 0 | 0 | 0 | 0 | 0 | 2624\_S01 | 0 | 0 | 0 | 0 | 0 | 0 | 2625\_S01 | 0 | 0 | 0 | 0 | 0 | 0 | 2626\_S01 | 0 | 0 | 0 | 0 | 0 | 0 | 2627\_S01 | 0 | 0 | 0 | 0 | 0 | 0 | 2628\_S01 | 0 | 0 | 0 | 0 | 0 | 0 | 2629\_S01 | 0 | 0 | 0 | 0 | 0 | 0 | 2630\_S01 | 0 | 0 | 0 | 0 | 0 | 0 | 2631\_S01 | 0 | 0 | 0 | 0 | 0 | 0 | 2632\_S01 | 0 | 0 | 0 | 0 | 0 | 0 | 2633\_S01 | 0 | 0 | 0 | 0 | 0 | 0 | 2634\_S01 | 0 | 0 | 0 | 0 | 0 | 0 | 2635\_S01 | 0 | 0 | 0 | 0 | 0 | 0 | 2636\_S01 | 0 | 0 | 0 | 0 | 0 | 0 | 2637\_S01 | 0 | 0 | 0 | 0 | 0 | 0 | 2638\_S01 | 0 | 0 | 0 | 0 | 0 | 0 | 2639\_S01 | 0 | 0 | 0 | 0 | 0 | 0 | 2640\_S01 | 0 | 0 | 0 | 0 | 0 | 0 | 2641\_S01 | 0 | 0 | 0 | 0 | 0 | 0 | 2642\_S01 | 0 | 0 | 0 | 0 | 0 | 0 | 2643\_S01 | 0 | 0 | 0 | 0 | 0 | 0 | 2644\_S01 | 0 | 0 | 0 | 0 | 0 | 0 | 2645\_S01 | 0 | 0 | 0 | 0 | 0 | 0 | 2646\_S01 | 0 | 0 | 0 | 0 | 0 | 0 | 2647\_S01 | 0 | 0 | 0 | 0 | 0 | 0 | 2648\_S01 | 0 | 0 | 0 | 0 | 0 | 0 | 2650\_S01 | 0 | 0 | 0 | 0 | 0 | 0 | 2651\_S01 | 0 | 0 | 0 | 0 | 0 | 0 | 2652\_S01 | 0 | 0 | 0 | 0 | 0 | 0 | 2653\_S01 | 0 | 0 | 0 | 0 | 0 | 0 | 2654\_S01 | 0 | 0 | 0 | 0 | 0 | 0 | 2655\_S01 | 0 | 0 | 0 | 0 | 0 | 0 | 2656\_S01 | 0 | 0 | 0 | 0 | 0 | 0 | 2657\_S01 | 0 | 0 | 0 | 0 | 0 | 0 | 2658\_S01 | 0 | 0 | 0 | 0 | 0 | 0 | 2659\_S01 | 0 | 0 | 0 | 0 | 0 | 0 | 2660\_S01 | 0 | 0 | 0 | 0 | 0 | 0 | 2661\_S01 | 0 | 0 | 0 | 0 | 0 | 0 | 2662\_S01 | 0 | 0 | 0 | 0 | 0 | 0 | 2663\_S01 | 0 | 0 | 0 | 0 | 0 | 0 | 2664\_S01 | 0 | 0 | 0 | 0 | 0 | 0 | 2665\_S01 | 0 | 0 | 0 | 0 | 0 | 0 | 2666\_S01 | 0 | 0 | 0 | 0 | 0 | 0 | 2667\_S01 | 0 | 0 | 0 | 0 | 0 | 0 | 2668\_S01 | 0 | 0 | 0 | 0 | 0 | 0 | 2669\_S01 | 0 | 0 | 0 | 0 | 0 | 0 | 2670\_S01 | 0 | 0 | 0 | 0 | 0 | 0 | 2671\_S01 | 0 | 0 | 0 | 0 | 0 | 0 | 2672\_S01 | 0 | 0 | 0 | 0 | 0 | 0 | 2673\_S01 | 0 | 0 | 0 | 0 | 0 | 0 | 2674\_S01 | 0 | 0 | 0 | 0 | 0 | 0 | 2675\_S01 | 0 | 0 | 0 | 0 | 0 | 0 | 2676\_S01 | 0 | 0 | 0 | 0 | 0 | 0 | 2677\_S01 | 0 | 0 | 0 | 0 | 0 | 0 | 2678\_S01 | 0 | 0 | 0 | 0 | 0 | 0 | 2679\_S01 | 0 | 0 | 0 | 0 | 0 | 0 | 2680\_S01 | 0 | 0 | 0 | 0 | 0 | 0 | 2862\_S01 | 0 | 0 | 0 | 0 | 0 | 0 | 2863\_S01 | 0 | 0 | 0 | 0 | 0 | 0 | 2863\_S02 | 0 | 0 | 0 | 0 | 0 | 0 | 2864\_S02 | 0 | 0 | 0 | 0 | 0 | 0 | 2865\_S01 | 0 | 0 | 0 | 0 | 0 | 0 | 2866\_S01 | 0 | 0 | 0 | 0 | 0 | 0 | 2868\_S01 | 0 | 0 | 0 | 0 | 0 | 0 | 2870\_S01 | 0 | 0 | 0 | 0 | 0 | 0 | 2871\_S01 | 0 | 0 | 0 | 0 | 0 | 0 | 2872\_S01 | 0 | 0 | 0 | 0 | 0 | 0 | 2873\_S01 | 0 | 0 | 0 | 0 | 0 | 0 | 2874\_S01 | 0 | 0 | 0 | 0 | 0 | 0 | 2875\_S01 | 0 | 0 | 0 | 0 | 0 | 0 | 2877\_S01 | 0 | 0 | 0 | 0 | 0 | 0 | 2878\_S02 | 0 | 0 | 0 | 0 | 0 | 0 | 2878\_S01 | 0 | 0 | 0 | 0 | 0 | 0 | 2879\_S01 | 0 | 0 | 0 | 0 | 0 | 0 | 2880\_S01 | 0 | 0 | 0 | 0 | 0 | 0 | 2905\_S01 | 0 | 0 | 0 | 0 | 0 | 0 | 2906\_S01 | 0 | 0 | 0 | 0 | 0 | 0 | 2911\_S01 | 0 | 0 | 0 | 0 | 0 | 0 | 2912\_S01 | 0 | 0 | 0 | 0 | 0 | 0 | 2913\_S01 | 0 | 0 | 0 | 0 | 0 | 0 | 2916\_S01 | 0 | 0 | 0 | 0 | 0 | 0 | 2918\_S01 | 0 | 0 | 0 | 0 | 0 | 0 | 2919\_S01 | 0 | 0 | 0 | 0 | 0 | 0 | 2920\_S01 | 0 | 0 | 0 | 0 | 0 | 0 | 2921\_S01 | 0 | 0 | 0 | 0 | 0 | 0 | 2922\_S01 | 0 | 0 | 0 | 0 | 0 | 0 | 2923\_S01 | 0 | 0 | 0 | 0 | 0 | 0 | 2926\_S01 | 0 | 0 | 0 | 0 | 0 | 0 | 2927\_S01 | 0 | 0 | 0 | 0 | 0 | 0 | 2928\_S01 | 0 | 0 | 0 | 0 | 0 | 0 | 2929\_S01 | 0 | 0 | 0 | 0 | 0 | 0 | 2931\_S01 | 0 | 0 | 0 | 0 | 0 | 0 | 2932\_S01 | 0 | 0 | 0 | 0 | 0 | 0 | 2933\_S01 | 0 | 0 | 0 | 0 | 0 | 0 | 2934\_S01 | 0 | 0 | 0 | 0 | 0 | 0 | 2934\_S02 | 0 | 0 | 0 | 0 | 0 | 0 | 2936\_S01 | 0 | 0 | 0 | 0 | 0 | 0 | 2937\_S01 | 0 | 0 | 0 | 0 | 0 | 0 | 2938\_S01 | 0 | 0 | 0 | 0 | 0 | 0 | 2939\_S01 | 0 | 0 | 0 | 0 | 0 | 0 | 2947\_S01 | 0 | 0 | 0 | 0 | 0 | 0 | 2948\_S01 | 0 | 0 | 0 | 0 | 0 | 0 | 2949\_S01 | 0 | 0 | 0 | 0 | 0 | 0 | 2950\_S01 | 0 | 0 | 0 | 0 | 0 | 0 | 2950\_S02 | 0 | 0 | 0 | 0 | 0 | 0 | 3434\_S02 | 0 | 0 | 0 | 0 | 0 | 0 | 3434\_S01 | 0 | 0 | 0 | 0 | 0 | 0 | 3435\_S01 | 0 | 0 | 0 | 0 | 0 | 0 | 3436\_S01 | 0 | 0 | 0 | 0 | 0 | 0 | 3437\_S01 | 0 | 0 | 0 | 0 | 0 | 0 | 3438\_S01 | 0 | 0 | 0 | 0 | 0 | 0 | 3439\_S01 | 0 | 0 | 0 | 0 | 0 | 0 | 3440\_S01 | 0 | 0 | 0 | 0 | 0 | 0 | 3441\_S01 | 0 | 0 | 0 | 0 | 0 | 0 | 3441\_S02 | 0 | 0 | 0 | 0 | 0 | 0 | 3442\_S01 | 0 | 0 | 0 | 0 | 0 | 0 | 3444\_S02 | 0 | 0 | 0 | 0 | 0 | 0 | 3445\_S01 | 0 | 0 | 0 | 0 | 0 | 0 | 3445\_S02 | 0 | 0 | 0 | 0 | 0 | 0 | 3446\_S01 | 0 | 0 | 0 | 0 | 0 | 0 | 3447\_S01 | 0 | 0 | 0 | 0 | 0 | 0 | 3448\_S01 | 0 | 0 | 0 | 0 | 0 | 0 | 3449\_S01 | 0 | 0 | 0 | 0 | 0 | 0 | 3476\_S01 | 0 | 0 | 0 | 0 | 0 | 0 | 3508\_S01 | 0 | 0 | 0 | 0 | 0 | 0 | 3509\_S02 | 0 | 0 | 0 | 0 | 0 | 0 | 3509\_S01 | 0 | 0 | 0 | 0 | 0 | 0 | 3510\_S01 | 0 | 0 | 0 | 0 | 0 | 0 | 3511\_S01 | 0 | 0 | 0 | 0 | 0 | 0 | 3511\_S02 | 0 | 0 | 0 | 0 | 0 | 0 | 3512\_S01 | 0 | 0 | 0 | 0 | 0 | 0 | 3513\_S02 | 0 | 0 | 0 | 0 | 0 | 0 | 3513\_S01 | 0 | 0 | 0 | 0 | 0 | 0 | 3514\_S02 | 0 | 0 | 0 | 0 | 0 | 0 | 3514\_S01 | 0 | 0 | 0 | 0 | 0 | 0 | 3515\_S01 | 0 | 0 | 0 | 0 | 0 | 0 | 3516\_S01 | 0 | 0 | 0 | 0 | 0 | 0 | 3517\_S01 | 0 | 0 | 0 | 0 | 0 | 0 | 3518\_S01 | 0 | 0 | 0 | 0 | 0 | 0 | 3519\_S01 | 0 | 0 | 0 | 0 | 0 | 0 | 3520\_S01 | 0 | 0 | 0 | 0 | 0 | 0 | 3520\_S02 | 0 | 0 | 0 | 0 | 0 | 0 | 3521\_S01 | 0 | 0 | 0 | 0 | 0 | 0 | 3522\_S01 | 0 | 0 | 0 | 0 | 0 | 0 | 3623\_S01 | 0 | 0 | 0 | 0 | 0 | 0 | 3624\_S01 | 0 | 0 | 0 | 0 | 0 | 0 | 3625\_S01 | 0 | 0 | 0 | 0 | 0 | 0 | 3626\_S01 | 0 | 0 | 0 | 0 | 0 | 0 | 3627\_S01 | 0 | 0 | 0 | 0 | 0 | 0 | 3628\_S01 | 0 | 0 | 0 | 0 | 0 | 0 | 3629\_S01 | 0 | 0 | 0 | 0 | 0 | 0 | 3630\_S01 | 0 | 0 | 0 | 0 | 0 | 0 | 3631\_S01 | 0 | 0 | 0 | 0 | 0 | 0 | 3632\_S01 | 0 | 0 | 0 | 0 | 0 | 0 | 3633\_S01 | 0 | 0 | 0 | 0 | 0 | 0 | 3634\_S01 | 0 | 0 | 0 | 0 | 0 | 0 | 3635\_S01 | 0 | 0 | 0 | 0 | 0 | 0 | 3636\_S01 | 0 | 0 | 0 | 0 | 0 | 0 | 3637\_S01 | 0 | 0 | 0 | 0 | 0 | 0 | 3638\_S01 | 0 | 0 | 0 | 0 | 0 | 0 | 3639\_S01 | 0 | 0 | 0 | 0 | 0 | 0 | 3640\_S01 | 0 | 0 | 0 | 0 | 0 | 0 | 3693\_S01 | 0 | 0 | 0 | 0 | 0 | 0 | 3694\_S01 | 0 | 0 | 0 | 0 | 0 | 0 | 3695\_S01 | 0 | 0 | 0 | 0 | 0 | 0 | 3696\_S01 | 0 | 0 | 0 | 0 | 0 | 0 | 3697\_S01 | 0 | 0 | 0 | 0 | 0 | 0 | 3698\_S01 | 0 | 0 | 0 | 0 | 0 | 0 | 3699\_S01 | 0 | 0 | 0 | 0 | 0 | 0 | 3700\_S01 | 0 | 0 | 0 | 0 | 0 | 0 | 3701\_S01 | 0 | 0 | 0 | 0 | 0 | 0 | 3702\_S01 | 0 | 0 | 0 | 0 | 0 | 0 | 3703\_S01 | 0 | 0 | 0 | 0 | 0 | 0 | 3704\_S01 | 0 | 0 | 0 | 0 | 0 | 0 | 3705\_S01 | 0 | 0 | 0 | 0 | 0 | 0 | 3706\_S01 | 0 | 0 | 0 | 0 | 0 | 0 | 3707\_S01 | 0 | 0 | 0 | 0 | 0 | 0 | 3708\_S01 | 0 | 0 | 0 | 0 | 0 | 0 | 3709\_S01 | 0 | 0 | 0 | 0 | 0 | 0 | 3710\_S01 | 0 | 0 | 0 | 0 | 0 | 0 | 3711\_S01 | 0 | 0 | 0 | 0 | 0 | 0 | 3712\_S01 | 0 | 0 | 0 | 0 | 0 | 0 | 3932\_S01 | 0 | 0 | 0 | 0 | 0 | 0 | 3933\_S01 | 0 | 0 | 0 | 0 | 0 | 0 | 3946\_S01 | 0 | 0 | 0 | 0 | 0 | 0 | 3947\_S01 | 0 | 0 | 0 | 0 | 0 | 0 | 3948\_S01 | 0 | 0 | 0 | 0 | 0 | 0 | 3949\_S01 | 0 | 0 | 0 | 0 | 0 | 0 | 3950\_S01 | 0 | 0 | 0 | 0 | 0 | 0 | 3951\_S01 | 0 | 0 | 0 | 0 | 0 | 0 | 3952\_S01 | 0 | 0 | 0 | 0 | 0 | 0 | 3953\_S01 | 0 | 0 | 0 | 0 | 0 | 0 | 3954\_S01 | 0 | 0 | 0 | 0 | 0 | 0 | 3979\_S02 | 0 | 0 | 0 | 0 | 0 | 0 | 3979\_S01 | 0 | 0 | 0 | 0 | 0 | 0 | 3980\_S02 | 0 | 0 | 0 | 0 | 0 | 0 | 3980\_S01 | 0 | 0 | 0 | 0 | 0 | 0 | 3981\_S02 | 0 | 0 | 0 | 0 | 0 | 0 | 3982\_S02 | 0 | 0 | 0 | 0 | 0 | 0 | 4221\_S01 | 0 | 0 | 0 | 0 | 0 | 0 | 4221\_S02 | 0 | 0 | 0 | 0 | 0 | 0 | 4222\_S01 | 0 | 0 | 0 | 0 | 0 | 0 | 4223\_S01 | 0 | 0 | 0 | 0 | 0 | 0 | 4224\_S01 | 0 | 0 | 0 | 0 | 0 | 0 | 4225\_S01 | 0 | 0 | 0 | 0 | 0 | 0 | 4226\_S01 | 0 | 0 | 0 | 0 | 0 | 0 | 4227\_S01 | 0 | 0 | 0 | 0 | 0 | 0 | 4228\_S01 | 0 | 0 | 0 | 0 | 0 | 0 | 4230\_S01 | 0 | 0 | 0 | 0 | 0 | 0 | 4231\_S01 | 0 | 0 | 0 | 0 | 0 | 0 | 4232\_S01 | 0 | 0 | 0 | 0 | 0 | 0 | 4233\_S01 | 0 | 0 | 0 | 0 | 0 | 0 | 4234\_S01 | 0 | 0 | 0 | 0 | 0 | 0 | 4235\_S01 | 0 | 0 | 0 | 0 | 0 | 0 | 4237\_S01 | 0 | 0 | 0 | 0 | 0 | 0 | 4239\_S01 | 0 | 0 | 0 | 0 | 0 | 0 | 4242\_S01 | 0 | 0 | 0 | 0 | 0 | 0 | 4243\_S01 | 0 | 0 | 0 | 0 | 0 | 0 | 4244\_S01 | 0 | 0 | 0 | 0 | 0 | 0 | 4245\_S01 | 0 | 0 | 0 | 0 | 0 | 0 | 4248\_S01 | 0 | 0 | 0 | 0 | 0 | 0 | 4249\_S01 | 0 | 0 | 0 | 0 | 0 | 0 | 4250\_S01 | 0 | 0 | 0 | 0 | 0 | 0 | 4340\_S01 | 0 | 0 | 0 | 0 | 0 | 0 | 4341\_S01 | 0 | 0 | 0 | 0 | 0 | 0 | 4342\_S01 | 0 | 0 | 0 | 0 | 0 | 0 | 4343\_S01 | 0 | 0 | 0 | 0 | 0 | 0 | 4344\_S01 | 0 | 0 | 0 | 0 | 0 | 0 | 4345\_S01 | 0 | 0 | 0 | 0 | 0 | 0 | 4346\_S01 | 0 | 0 | 0 | 0 | 0 | 0 | 4347\_S01 | 0 | 0 | 0 | 0 | 0 | 0 | 4348\_S01 | 0 | 0 | 0 | 0 | 0 | 0 | 4349\_S01 | 0 | 0 | 0 | 0 | 0 | 0 | 4350\_S01 | 0 | 0 | 0 | 0 | 0 | 0 | 4351\_S01 | 0 | 0 | 0 | 0 | 0 | 0 | 4352\_S01 | 0 | 0 | 0 | 0 | 0 | 0 | 4353\_S01 | 0 | 0 | 0 | 0 | 0 | 0 | 4354\_S01 | 0 | 0 | 0 | 0 | 0 | 0 | 4355\_S01 | 0 | 0 | 0 | 0 | 0 | 0 | 4356\_S01 | 0 | 0 | 0 | 0 | 0 | 0 | 4357\_S01 | 0 | 0 | 0 | 0 | 0 | 0 | 4358\_S01 | 0 | 0 | 0 | 0 | 0 | 0 | 4359\_S01 | 0 | 0 | 0 | 0 | 0 | 0 | 4360\_S01 | 0 | 0 | 0 | 0 | 0 | 0 | 4361\_S01 | 0 | 0 | 0 | 0 | 0 | 0 | 4362\_S01 | 0 | 0 | 0 | 0 | 0 | 0 | 4363\_S01 | 0 | 0 | 0 | 0 | 0 | 0 | 4364\_S01 | 0 | 0 | 0 | 0 | 0 | 0 | 4365\_S01 | 0 | 0 | 0 | 0 | 0 | 0 | 4366\_S01 | 0 | 0 | 0 | 0 | 0 | 0 | 4367\_S01 | 0 | 0 | 0 | 0 | 0 | 0 | 4368\_S01 | 0 | 0 | 0 | 0 | 0 | 0 | 4369\_S01 | 0 | 0 | 0 | 0 | 0 | 0 | 4370\_S01 | 0 | 0 | 0 | 0 | 0 | 0 | 4371\_S01 | 0 | 0 | 0 | 0 | 0 | 0 | 4372\_S01 | 0 | 0 | 0 | 0 | 0 | 0 | 4373\_S01 | 0 | 0 | 0 | 0 | 0 | 0 | 4374\_S01 | 0 | 0 | 0 | 0 | 0 | 0 | 4374\_S02 | 0 | 0 | 0 | 0 | 0 | 0 | 4375\_S01 | 0 | 0 | 0 | 0 | 0 | 0 | 4376\_S01 | 0 | 0 | 0 | 0 | 0 | 0 | 4377\_S01 | 0 | 0 | 0 | 0 | 0 | 0 | 4378\_S01 | 0 | 0 | 0 | 0 | 0 | 0 | 4379\_S01 | 0 | 0 | 0 | 0 | 0 | 0 | 4380\_S01 | 0 | 0 | 0 | 0 | 0 | 0 | 4381\_S01 | 0 | 0 | 0 | 0 | 0 | 0 | 4382\_S01 | 0 | 0 | 0 | 0 | 0 | 0 | 4383\_S01 | 0 | 0 | 0 | 0 | 0 | 0 | 4384\_S01 | 0 | 0 | 0 | 0 | 0 | 0 | 4385\_S01 | 0 | 0 | 0 | 0 | 0 | 0 | 4386\_S01 | 0 | 0 | 0 | 0 | 0 | 0 | 4387\_S01 | 0 | 0 | 0 | 0 | 0 | 0 | 4387\_S02 | 0 | 0 | 0 | 0 | 0 | 0 | 4388\_S01 | 0 | 0 | 0 | 0 | 0 | 0 | 4389\_S01 | 0 | 0 | 0 | 0 | 0 | 0 | 4390\_S01 | 0 | 0 | 0 | 0 | 0 | 0 | 4391\_S01 | 0 | 0 | 0 | 0 | 0 | 0 | 4392\_S01 | 0 | 0 | 0 | 0 | 0 | 0 | 4393\_S01 | 0 | 0 | 0 | 0 | 0 | 0 | 4394\_S01 | 0 | 0 | 0 | 0 | 0 | 0 | 4395\_S01 | 0 | 0 | 0 | 0 | 0 | 0 | 4396\_S01 | 0 | 0 | 0 | 0 | 0 | 0 | 4397\_S01 | 0 | 0 | 0 | 0 | 0 | 0 | 4398\_S01 | 0 | 0 | 0 | 0 | 0 | 0 | 4399\_S01 | 0 | 0 | 0 | 0 | 0 | 0 | 4400\_S01 | 0 | 0 | 0 | 0 | 0 | 0 | 4401\_S01 | 0 | 0 | 0 | 0 | 0 | 0 | 4402\_S01 | 0 | 0 | 0 | 0 | 0 | 0 | 4403\_S01 | 0 | 0 | 0 | 0 | 0 | 0 | 4404\_S01 | 0 | 0 | 0 | 0 | 0 | 0 | 4405\_S01 | 0 | 0 | 0 | 0 | 0 | 0 | 4406\_S01 | 0 | 0 | 0 | 0 | 0 | 0 | 4407\_S01 | 0 | 0 | 0 | 0 | 0 | 0 | 4408\_S01 | 0 | 0 | 0 | 0 | 0 | 0 | 4409\_S01 | 0 | 0 | 0 | 0 | 0 | 0 | 4410\_S01 | 0 | 0 | 0 | 0 | 0 | 0 | 4411\_S01 | 0 | 0 | 0 | 0 | 0 | 0 | 4412\_S01 | 0 | 0 | 0 | 0 | 0 | 0 | 4413\_S01 | 0 | 0 | 0 | 0 | 0 | 0 | 4414\_S01 | 0 | 0 | 0 | 0 | 0 | 0 | 4415\_S01 | 0 | 0 | 0 | 0 | 0 | 0 | 4416\_S01 | 0 | 0 | 0 | 0 | 0 | 0 | 5012\_S01 | 0 | 0 | 0 | 0 | 0 | 0 | 5013\_S01 | 0 | 0 | 0 | 0 | 0 | 0 | 5014\_S01 | 0 | 0 | 0 | 0 | 0 | 0 | 5015\_S01 | 0 | 0 | 0 | 0 | 0 | 0 | 5016\_S01 | 0 | 0 | 0 | 0 | 0 | 0 | 5019\_S01 | 0 | 0 | 0 | 0 | 0 | 0 | 5020\_S01 | 0 | 0 | 0 | 0 | 0 | 0 | 5021\_S01 | 0 | 0 | 0 | 0 | 0 | 0 | 5022\_S01 | 0 | 0 | 0 | 0 | 0 | 0 | 5023\_S01 | 0 | 0 | 0 | 0 | 0 | 0 | 5024\_S01 | 0 | 0 | 0 | 0 | 0 | 0 | 5025\_S01 | 0 | 0 | 0 | 0 | 0 | 0 | 5026\_S01 | 0 | 0 | 0 | 0 | 0 | 0 | 5027\_S01 | 0 | 0 | 0 | 0 | 0 | 0 | 5028\_S01 | 0 | 0 | 0 | 0 | 0 | 0 | 5029\_S01 | 0 | 0 | 0 | 0 | 0 | 0 | 5048\_S01 | 0 | 0 | 0 | 0 | 0 | 0 | 5049\_S01 | 0 | 0 | 0 | 0 | 0 | 0 | 5050\_S01 | 0 | 0 | 0 | 0 | 0 | 0 | 5051\_S01 | 0 | 0 | 0 | 0 | 0 | 0 | 5052\_S01 | 0 | 0 | 0 | 0 | 0 | 0 | 5053\_S01 | 0 | 0 | 0 | 0 | 0 | 0 | 5054\_S01 | 0 | 0 | 0 | 0 | 0 | 0 | 5055\_S01 | 0 | 0 | 0 | 0 | 0 | 0 | 5056\_S01 | 0 | 0 | 0 | 0 | 0 | 0 | 5057\_S01 | 0 | 0 | 0 | 0 | 0 | 0 | 5058\_S01 | 0 | 0 | 0 | 0 | 0 | 0 | 5059\_S01 | 0 | 0 | 0 | 0 | 0 | 0 | 5060\_S01 | 0 | 0 | 0 | 0 | 0 | 0 | 5061\_S01 | 0 | 0 | 0 | 0 | 0 | 0 | 5062\_S01 | 0 | 0 | 0 | 0 | 0 | 0 | 5063\_S01 | 0 | 0 | 0 | 0 | 0 | 0 | 5064\_S01 | 0 | 0 | 0 | 0 | 0 | 0 | 5066\_S01 | 0 | 0 | 0 | 0 | 0 | 0 | 5067\_S01 | 0 | 0 | 0 | 0 | 0 | 0 | 5068\_S01 | 0 | 0 | 0 | 0 | 0 | 0 | 5069\_S01 | 0 | 0 | 0 | 0 | 0 | 0 | 5070\_S01 | 0 | 0 | 0 | 0 | 0 | 0 | 5071\_S01 | 0 | 0 | 0 | 0 | 0 | 0 | 5072\_S01 | 0 | 0 | 0 | 0 | 0 | 0 | 5073\_S01 | 0 | 0 | 0 | 0 | 0 | 0 | 5074\_S01 | 0 | 0 | 0 | 0 | 0 | 0 | 5075\_S01 | 0 | 0 | 0 | 0 | 0 | 0 | 5076\_S01 | 0 | 0 | 0 | 0 | 0 | 0 | 5077\_S01 | 0 | 0 | 0 | 0 | 0 | 0 | 5078\_S01 | 0 | 0 | 0 | 0 | 0 | 0 | 5079\_S01 | 0 | 0 | 0 | 0 | 0 | 0 | 5080\_S01 | 0 | 0 | 0 | 0 | 0 | 0 | 5081\_S01 | 0 | 0 | 0 | 0 | 0 | 0 | 5082\_S01 | 0 | 0 | 0 | 0 | 0 | 0 | 5083\_S01 | 0 | 0 | 0 | 0 | 0 | 0 | 5084\_S01 | 0 | 0 | 0 | 0 | 0 | 0 | 5085\_S01 | 0 | 0 | 0 | 0 | 0 | 0 | 5086\_S01 | 0 | 0 | 0 | 0 | 0 | 0 | 5137\_S01 | 0 | 0 | 0 | 0 | 0 | 0 | 5138\_S01 | 0 | 0 | 0 | 0 | 0 | 0 | 5139\_S01 | 0 | 0 | 0 | 0 | 0 | 0 | 5140\_S01 | 0 | 0 | 0 | 0 | 0 | 0 | 5141\_S01 | 0 | 0 | 0 | 0 | 0 | 0 | 5142\_S01 | 0 | 0 | 0 | 0 | 0 | 0 | 5163\_S01 | 0 | 0 | 0 | 0 | 0 | 0 | 5164\_S01 | 0 | 0 | 0 | 0 | 0 | 0 | 5165\_S01 | 0 | 0 | 0 | 0 | 0 | 0 | 5167\_S01 | 0 | 0 | 0 | 0 | 0 | 0 | 5168\_S01 | 0 | 0 | 0 | 0 | 0 | 0 | 5169\_S01 | 0 | 0 | 0 | 0 | 0 | 0 | 5170\_S01 | 0 | 0 | 0 | 0 | 0 | 0 | 5171\_S01 | 0 | 0 | 0 | 0 | 0 | 0 | 5173\_S01 | 0 | 0 | 0 | 0 | 0 | 0 | 5174\_S01 | 0 | 0 | 0 | 0 | 0 | 0 | 5175\_S01 | 0 | 0 | 0 | 0 | 0 | 0 | 5176\_S02 | 0 | 0 | 0 | 0 | 0 | 0 | 5176\_S01 | 0 | 0 | 0 | 0 | 0 | 0 | 5177\_S01 | 0 | 0 | 0 | 0 | 0 | 0 | 5178\_S01 | 0 | 0 | 0 | 0 | 0 | 0 | 5179\_S01 | 0 | 0 | 0 | 0 | 0 | 0 | 5180\_S01 | 0 | 0 | 0 | 0 | 0 | 0 | 5181\_S02 | 0 | 0 | 0 | 0 | 0 | 0 | 5181\_S01 | 0 | 0 | 0 | 0 | 0 | 0 | 5182\_S01 | 0 | 0 | 0 | 0 | 0 | 0 | 5183\_S01 | 0 | 0 | 0 | 0 | 0 | 0 | 5185\_S01 | 0 | 0 | 0 | 0 | 0 | 0 | 5198\_S01 | 0 | 0 | 0 | 0 | 0 | 0 | 5200\_S01 | 0 | 0 | 0 | 0 | 0 | 0 | 5201\_S01 | 0 | 0 | 0 | 0 | 0 | 0 | 5202\_S01 | 0 | 0 | 0 | 0 | 0 | 0 | 5203\_S01 | 0 | 0 | 0 | 0 | 0 | 0 | 5300\_S01 | 0 | 0 | 0 | 0 | 0 | 0 | 5301\_S01 | 0 | 0 | 0 | 0 | 0 | 0 | 5302\_S01 | 0 | 0 | 0 | 0 | 0 | 0 | 5303\_S01 | 0 | 0 | 0 | 0 | 0 | 0 | 5304\_S01 | 0 | 0 | 0 | 0 | 0 | 0 |
