# Supplementary material for: The tomato genome sequence provides insights into fleshy fruit evolution
Source: Springer Nature journal article supplement (doi:10.1038/nature11119), 2012-05-01
Supplement: 41586_2012_BFnature11119_MOESM69_ESM.zip [file 41586_2012_BFnature11119_MOESM69_ESM.zip › Supplementary_HTM_tables/Supplementary_HTM_Table_11_miR164_S01.htm]

|  |  |  |  |  |  |  |  |
| --- | --- | --- | --- | --- | --- | --- | --- |
| miRNA\_VARIANT\_SEQUENCE | Sz | L | L | L | L | L | L |
 UGGAGAAGCAGGGCACGUGCA | 21 | 0 | 0 | 0 | 0 | 0 | 0 | UGGAGAAGCAGGGCACGUGCU | 21 | 0 | 0 | 0 | 0 | 0 | 0 | UGGAGAAGCAGGGCACGUGCAU | 22 | 0 | 0 | 0 | 0 | 0 | 0 | UGGAGAAGCAGGGCACGCGCA | 21 | 0 | 0 | 0 | 0 | 0 | 0 | UGGAGAAGCAGGGCACGUGCC | 21 | 0 | 0 | 0 | 0 | 0 | 0 | UGGAGAAGCAGGGUACGUGCU | 21 | 0 | 0 | 0 | 0 | 0 | 0 | UGGAGAAGCAGGGCACGUGCAUU | 23 | 0 | 0 | 0 | 0 | 0 | 0 | UGGAGAAGCAGGGCACGGGCA | 21 | 0 | 0 | 0 | 0 | 0 | 0 | UGGAGAAGCAGGGCACGUGC | 20 | 0 | 0 | 0 | 0 | 0 | 0 | UGGAGAAGCAGGGCACGAGCA | 21 | 0 | 0 | 0 | 0 | 0 | 0 | UGGAGAAGCAGGGAACGUGCA | 21 | 0 | 0 | 0 | 0 | 0 | 0 | UGGAGAAGCAGGGCACUUGCA | 21 | 0 | 0 | 0 | 0 | 0 | 0 | AAUGGAGAAGCAGGGCACGUGCA | 23 | 0 | 0 | 0 | 0 | 0 | 0 | UGGAGAAGCAGGGCACGUGAA | 21 | 0 | 0 | 0 | 0 | 0 | 0 | UGGAGAAGCAGGGCAUGUGCA | 21 | 0 | 0 | 0 | 0 | 0 | 0 | UGGAGAAGCAGGGCCCGUGCA | 21 | 0 | 0 | 0 | 0 | 0 | 0 | UGGAGAAGCAGGGUACGUGCA | 21 | 0 | 0 | 0 | 0 | 0 | 0 | UGGAGAAGCAGGGCACGUGCG | 21 | 0 | 0 | 0 | 0 | 0 | 0 | UGGAGAAGCAGGGCAAGUGCA | 21 | 0 | 0 | 0 | 0 | 0 | 0 | UGGAGAAGCAGGGCACGUGCAA | 22 | 0 | 0 | 0 | 0 | 0 | 0 | UGGAGAAGCAGGGCACGUCCA | 21 | 0 | 0 | 0 | 0 | 0 | 0 | UGGAGAAGCAGGGCACCUGCA | 21 | 0 | 0 | 0 | 0 | 0 | 0 | UGGAGAAGCAGGGCACGUGUA | 21 | 0 | 0 | 0 | 0 | 0 | 0 | UGGAGAAGUAGGGCACGUGCA | 21 | 0 | 0 | 0 | 0 | 0 | 0 | UGGAGAAGCAGGUCACGUGCA | 21 | 0 | 0 | 0 | 0 | 0 | 0 | UGGAGAAGCAGGGCACAUGCA | 21 | 0 | 0 | 0 | 0 | 0 | 0 | UGGAGAAUCAGGGCACGUGCA | 21 | 0 | 0 | 0 | 0 | 0 | 0 | UGGAGAAGCAGGGCGCGUGCA | 21 | 0 | 0 | 0 | 0 | 0 | 0 | UGGAGAAGCAGGGCACGUUCA | 21 | 0 | 0 | 0 | 0 | 0 | 0 | UGGAGACGCAGGGCACGUGCA | 21 | 0 | 0 | 0 | 0 | 0 | 0 | UGGAGAAGCAGGCCACGUGCA | 21 | 0 | 0 | 0 | 0 | 0 | 0 | UGGAGAAGCAGGGACCGUGCA | 21 | 0 | 0 | 0 | 0 | 0 | 0 | UGGAGAAGCAGGGCCCAUGCA | 21 | 0 | 0 | 0 | 0 | 0 | 0 | GGGAGAAGCAGGGCACGUGCA | 21 | 0 | 0 | 0 | 0 | 0 | 0 | UGGAGAAGCAGGGCCCGUGCC | 21 | 0 | 0 | 0 | 0 | 0 | 0 | UGGAGAAGCAGGGAACGUGAA | 21 | 0 | 0 | 0 | 0 | 0 | 0 | UGGAGAAGCAGGGCAAGUGAA | 21 | 0 | 0 | 0 | 0 | 0 | 0 | UGGAGAAGCAGGGGACGUGCU | 21 | 0 | 0 | 0 | 0 | 0 | 0 | UGGAGAAGCAGUGCACGUGCA | 21 | 0 | 0 | 0 | 0 | 0 | 0 | UGGAGAAGCAGGGAACGUGCC | 21 | 0 | 0 | 0 | 0 | 0 | 0 | UGGAGAAGCAGGGCACGUGGA | 21 | 0 | 0 | 0 | 0 | 0 | 0 | UGGAGAAGCAGGGAACGGGCA | 21 | 0 | 0 | 0 | 0 | 0 | 0 | UGGAGAAGCAGGGGACGUGCG | 21 | 0 | 0 | 0 | 0 | 0 | 0 | GGAGAAGGAGAACACGUGCAA | 21 | 0 | 0 | 0 | 0 | 0 | 0 | UGGAGAAGCAGGGCACGUUU | 20 | 0 | 0 | 0 | 0 | 0 | 0 | UGGAGAAGUAGGGCACGUGCAU | 22 | 0 | 0 | 0 | 0 | 0 | 0 | UGGAGAAGCUGGGCACGUGCA | 21 | 0 | 0 | 0 | 0 | 0 | 0 | UGAGAAGCAGGGCACGUGCA | 20 | 0 | 0 | 0 | 0 | 0 | 0 | UGGAGAAGCAGGGCAAGGGCA | 21 | 0 | 0 | 0 | 0 | 0 | 0 | UGGAGAAGCAGGGCACGAGCC | 21 | 0 | 0 | 0 | 0 | 0 | 0 | UGGAGAAGCAGGGCAAGCGCA | 21 | 0 | 0 | 0 | 0 | 0 | 0 | UGGAGAAGCAGGGCACGUCCC | 21 | 0 | 0 | 0 | 0 | 0 | 0 | UGGAGAAGCAGGACACGUGCA | 21 | 0 | 0 | 0 | 0 | 0 | 0 | UGGAGAAGCAGGGCACGUGA | 20 | 0 | 0 | 0 | 0 | 0 | 0 | UGGAGAAGCAUGGCACGUGCA | 21 | 0 | 0 | 0 | 0 | 0 | 0 | UGGAGAAGCAGGGCACCGGCA | 21 | 0 | 0 | 0 | 0 | 0 | 0 | UGGAGAAGCAGGGCCCGGGCA | 21 | 0 | 0 | 0 | 0 | 0 | 0 | UGGAGAAGCAGGGCACGUGUG | 21 | 0 | 0 | 0 | 0 | 0 | 0 | UGGAGAAGCAGGGCACAUGCU | 21 | 0 | 0 | 0 | 0 | 0 | 0 | UGGAGAAGCAGGCCACGUGCC | 21 | 0 | 0 | 0 | 0 | 0 | 0 | UGGAGAAGCAGGGCACGUGGU | 21 | 0 | 0 | 0 | 0 | 0 | 0 | UGCAGAAGCAGGGCACGUGCA | 21 | 0 | 0 | 0 | 0 | 0 | 0 | UGGAGAAGCAGGGCACGCGCAU | 22 | 0 | 0 | 0 | 0 | 0 | 0 | UGGAGAUGCAGGGCACGUGCA | 21 | 0 | 0 | 0 | 0 | 0 | 0 | UGGAGAAGCAGGGCACGGGCC | 21 | 0 | 0 | 0 | 0 | 0 | 0 | UGGAGAAGCAGGGCACGUCA | 20 | 0 | 0 | 0 | 0 | 0 | 0 | GGAGAAGCAGGGCACGUGCAU | 21 | 0 | 0 | 0 | 0 | 0 | 0 | UGGAGAAGCAGGUCACGUGCU | 21 | 0 | 0 | 0 | 0 | 0 | 0 | UGGAGAAGCAGGGCUCAUGCA | 21 | 0 | 0 | 0 | 0 | 0 | 0 | UGGAGAAGCAGGGCACGUUCU | 21 | 0 | 0 | 0 | 0 | 0 | 0 | UGGAGAAGCAGGACACGUGAA | 21 | 0 | 0 | 0 | 0 | 0 | 0 | UGGGAAGCAGGGCACGUGCA | 20 | 0 | 0 | 0 | 0 | 0 | 0 | UGGAGAAGCAGGGCACGUGUC | 21 | 0 | 0 | 0 | 0 | 0 | 0 | UGGAGAGGCAGGGCACGUGCA | 21 | 0 | 0 | 0 | 0 | 0 | 0 | UGGAGAAGCAGGGCACGGGAA | 21 | 0 | 0 | 0 | 0 | 0 | 0 | UGGAGAAGCAGGGAAUGUGCA | 21 | 0 | 0 | 0 | 0 | 0 | 0 | UGGAGAAGCAGGGCAUGUGCU | 21 | 0 | 0 | 0 | 0 | 0 | 0 | UGGAGAAGCAGGGCACGUGAC | 21 | 0 | 0 | 0 | 0 | 0 | 0 | UGGAGAAGCAGGGCACGCGCG | 21 | 0 | 0 | 0 | 0 | 0 | 0 | UGGAGAAGCAGGGCGCGUGCU | 21 | 0 | 0 | 0 | 0 | 0 | 0 | UGGAGAAGCAGGGAAGGUGCA | 21 | 0 | 0 | 0 | 0 | 0 | 0 | UGGAGAAGCAGGGCACGUGCCA | 22 | 0 | 0 | 0 | 0 | 0 | 0 | UGGAGAAGCAGGGUACGCGCU | 21 | 0 | 0 | 0 | 0 | 0 | 0 | UGGAGAAGCAGGGCACGUGAG | 21 | 0 | 0 | 0 | 0 | 0 | 0 | UGGAGAAGCCGGGCACGCGCA | 21 | 0 | 0 | 0 | 0 | 0 | 0 | UGGAGAAGCAUGGCACGUGCU | 21 | 0 | 0 | 0 | 0 | 0 | 0 | UGGAGAAGCAGGCAACGGGCA | 21 | 0 | 0 | 0 | 0 | 0 | 0 | UGGAGAAGCAGGGCACGUACA | 21 | 0 | 0 | 0 | 0 | 0 | 0 | UGGAGAAGCAGGGCAGGUGCA | 21 | 0 | 0 | 0 | 0 | 0 | 0 | UGGAGAACCAGGGCACGUGCA | 21 | 0 | 0 | 0 | 0 | 0 | 0 | UGGAGAAGCAGGGAACGUGCU | 21 | 0 | 0 | 0 | 0 | 0 | 0 | UGGAGAAGCAGGGCACGUUAUUUU | 24 | 0 | 0 | 0 | 0 | 0 | 0 | UGGAGAAGCAGGGAACAUGCA | 21 | 0 | 0 | 0 | 0 | 0 | 0 | UGGAGAAGCAGGGCACGUGU | 20 | 0 | 0 | 0 | 0 | 0 | 0 | UGGACAAGCAGGGCACGUGCA | 21 | 0 | 0 | 0 | 0 | 0 | 0 | UGGAGAAGCAGGGCACGACCA | 21 | 0 | 0 | 0 | 0 | 0 | 0 | UGGAGAAGCAGGGCACACGCA | 21 | 0 | 0 | 0 | 0 | 0 | 0 | GUUGGAGAAGCAGGGCACGUG | 21 | 0 | 0 | 0 | 0 | 0 | 0 | UGGGGAAGCAGGGCACGUGCU | 21 | 0 | 0 | 0 | 0 | 0 | 0 | UGGAGAAGCAGGGAACGCGCA | 21 | 0 | 0 | 0 | 0 | 0 | 0 | UGGCGAAGCAGGGCACGUGCU | 21 | 0 | 0 | 0 | 0 | 0 | 0 |
