# Supplementary material for: The tomato genome sequence provides insights into fleshy fruit evolution
Source: Springer Nature journal article supplement (doi:10.1038/nature11119), 2012-05-01
Supplement: 41586_2012_BFnature11119_MOESM69_ESM.zip [file 41586_2012_BFnature11119_MOESM69_ESM.zip › Supplementary_HTM_tables/Supplementary_HTM_Table_12_miR166_S01.htm]

|  |  |  |  |  |  |  |  |
| --- | --- | --- | --- | --- | --- | --- | --- |
| miRNA\_VARIANT\_SEQUENCE | Sz | L | L | L | L | L | L |
 UCGGACCAGGCUUCAUUCCCC | 21 | 0 | 0 | 0 | 0 | 0 | 0 | UCGGACCAGGCUUCAUUCCUC | 21 | 0 | 0 | 0 | 0 | 0 | 0 | UCUCGGACCAGGCUUCAUUCC | 21 | 0 | 0 | 0 | 0 | 0 | 0 | UUCGGACCAGGCUUCAUUCCC | 21 | 0 | 0 | 0 | 0 | 0 | 0 | UCGGACCAGGCUUCCUUCCCC | 21 | 0 | 0 | 0 | 0 | 0 | 0 | UCGGACCAGGCUUCCUUCCUC | 21 | 0 | 0 | 0 | 0 | 0 | 0 | UCGGACCAGGCUUCAUUUCCC | 21 | 0 | 0 | 0 | 0 | 0 | 0 | UCGGACCAGGCUUCAUUCCC | 20 | 0 | 0 | 0 | 0 | 0 | 0 | UCGGACCAGGCUUCAUUCUCC | 21 | 0 | 0 | 0 | 0 | 0 | 0 | UCUCGGACCAGGCUUCCUUCC | 21 | 0 | 0 | 0 | 0 | 0 | 0 | UCGGACCAGGAUUCAUUCCCC | 21 | 0 | 0 | 0 | 0 | 0 | 0 | UCGGACCAGGCUUAAUUCCCC | 21 | 0 | 0 | 0 | 0 | 0 | 0 | UCUCGGACCAGGCUUCAUUC | 20 | 0 | 0 | 0 | 0 | 0 | 0 | UCGGACCAGGCUUCAUCCCCC | 21 | 0 | 0 | 0 | 0 | 0 | 0 | UCGGACCAGGCUUCAUUUCUC | 21 | 0 | 0 | 0 | 0 | 0 | 0 | UCGGAUUAGGCUUCAUUCCCC | 21 | 0 | 0 | 0 | 0 | 0 | 0 | UCGGACCAGGCUUCUUUCCUC | 21 | 0 | 0 | 0 | 0 | 0 | 0 | UCGGACCAGGCUUCUUUCCCC | 21 | 0 | 0 | 0 | 0 | 0 | 0 | UCGGACCAGGCUUCAUUACCC | 21 | 0 | 0 | 0 | 0 | 0 | 0 | UCGGACCAGGCUUUAUUCCCC | 21 | 0 | 0 | 0 | 0 | 0 | 0 | UUUCGGACCAGGCUUCAUUCCC | 22 | 0 | 0 | 0 | 0 | 0 | 0 | UCGGAUCAGGCUUCAUUCCCC | 21 | 0 | 0 | 0 | 0 | 0 | 0 | UUCGGACCAGGCUUCAUUCCCC | 22 | 0 | 0 | 0 | 0 | 0 | 0 | UCGGACCAGGCUUCAUUCCCCA | 22 | 0 | 0 | 0 | 0 | 0 | 0 | UCUCGGACCAGGCUUCAUUUUU | 22 | 0 | 0 | 0 | 0 | 0 | 0 | UCGGACCAGGCUUCGUUCCCC | 21 | 0 | 0 | 0 | 0 | 0 | 0 | UCUCGGACCAGGCUUCAUUUU | 21 | 0 | 0 | 0 | 0 | 0 | 0 | AAUCGGACCAGGCUUCAUUCCCC | 23 | 0 | 0 | 0 | 0 | 0 | 0 | UCGGACCAGGCUUUAUUCCUC | 21 | 0 | 0 | 0 | 0 | 0 | 0 | AUCUCGGACCAGGCUUCAUUC | 21 | 0 | 0 | 0 | 0 | 0 | 0 | UCGGAUUAGGCUUCAUUCCUC | 21 | 0 | 0 | 0 | 0 | 0 | 0 | UCGGACUAGGCUUCAUUCCCC | 21 | 0 | 0 | 0 | 0 | 0 | 0 | UCUCGGACCAGGCUUCAUUU | 20 | 0 | 0 | 0 | 0 | 0 | 0 | UCGGACUAGGCUUCAUUCCUC | 21 | 0 | 0 | 0 | 0 | 0 | 0 | UCGGACCAGGCUUCAUUCCU | 20 | 0 | 0 | 0 | 0 | 0 | 0 | UCGGACCAGGCUUCGUUCCUC | 21 | 0 | 0 | 0 | 0 | 0 | 0 | UCGGACCAGGCUUCAUUUUCC | 21 | 0 | 0 | 0 | 0 | 0 | 0 | UCGGAUCAGGCUUCAUUCCUC | 21 | 0 | 0 | 0 | 0 | 0 | 0 | UCGGACCAGGCUUCAUUCACC | 21 | 0 | 0 | 0 | 0 | 0 | 0 | UCGGACCAGGCUUCAUUCCCU | 21 | 0 | 0 | 0 | 0 | 0 | 0 | UCGGACCAGGCUUCAUUACUC | 21 | 0 | 0 | 0 | 0 | 0 | 0 | UCGGACCAGGCUUCAUCCCUC | 21 | 0 | 0 | 0 | 0 | 0 | 0 | UCGGACCAGGCUUCAUUCUUC | 21 | 0 | 0 | 0 | 0 | 0 | 0 | UCGGACCAGGAUUCAUUCCUC | 21 | 0 | 0 | 0 | 0 | 0 | 0 | UCGGACCAGGCUUCAUUCCAC | 21 | 0 | 0 | 0 | 0 | 0 | 0 | UCGGACCAGGCUUCAUUCCCCAA | 23 | 0 | 0 | 0 | 0 | 0 | 0 | UCGGACCAGGCUUCAUUCCCA | 21 | 0 | 0 | 0 | 0 | 0 | 0 | UCGGAACAGGCUUCAUUCCCC | 21 | 0 | 0 | 0 | 0 | 0 | 0 | UCUCGGACCAGGCUUCAUUCU | 21 | 0 | 0 | 0 | 0 | 0 | 0 | UCGGCCCAGGCUUCAUUCCUC | 21 | 0 | 0 | 0 | 0 | 0 | 0 | UCUCGGACCAGGCUUCAUUCCU | 22 | 0 | 0 | 0 | 0 | 0 | 0 | UAGGACCAGGCUUCAUUCCUC | 21 | 0 | 0 | 0 | 0 | 0 | 0 | UCGGACCAGGCUUCAUCUCUC | 21 | 0 | 0 | 0 | 0 | 0 | 0 | UCGGACCAGGCUUCAUUCAUC | 21 | 0 | 0 | 0 | 0 | 0 | 0 | UCGGACCAGGCUUCAUUCCUA | 21 | 0 | 0 | 0 | 0 | 0 | 0 | UCGGACAAGGCUUCAUUCCUC | 21 | 0 | 0 | 0 | 0 | 0 | 0 | AUUUCGGACCAGGCUUCAUUC | 21 | 0 | 0 | 0 | 0 | 0 | 0 | UCGGAACAGGCUUCAUUCCUC | 21 | 0 | 0 | 0 | 0 | 0 | 0 | UCGGACCAGGCUUCAUUCCUU | 21 | 0 | 0 | 0 | 0 | 0 | 0 | UCUCGGACCAGGCUUCAUUUUUU | 23 | 0 | 0 | 0 | 0 | 0 | 0 | UCGGACCAGGCUUAAUUCCUC | 21 | 0 | 0 | 0 | 0 | 0 | 0 | UCUCGGACCAGGCUUCAUUCCAA | 23 | 0 | 0 | 0 | 0 | 0 | 0 | UCGGACCAGGCUUCAUUUUUC | 21 | 0 | 0 | 0 | 0 | 0 | 0 | UUGGACCAGGCUUCAUUCCUC | 21 | 0 | 0 | 0 | 0 | 0 | 0 | UCGGCCCAGGCUUCAUUCCCC | 21 | 0 | 0 | 0 | 0 | 0 | 0 | UCGGACCAGGCUUCAUUCCUCAA | 23 | 0 | 0 | 0 | 0 | 0 | 0 | CGGACCAGGCUUCAUUCCCC | 20 | 0 | 0 | 0 | 0 | 0 | 0 | UCGGACCAGGCUCCAUUCCCC | 21 | 0 | 0 | 0 | 0 | 0 | 0 | UCUCGGACCAGGCUUCUUUCC | 21 | 0 | 0 | 0 | 0 | 0 | 0 | UCGGACCAGGCUUCACUCCCC | 21 | 0 | 0 | 0 | 0 | 0 | 0 | UCGGACCAGGCUUCAUCAUUC | 21 | 0 | 0 | 0 | 0 | 0 | 0 | UCUCGGACCAGGCUUCAUUUC | 21 | 0 | 0 | 0 | 0 | 0 | 0 | CUCGGACCAGGCUUCAUUCCCC | 22 | 0 | 0 | 0 | 0 | 0 | 0 | UCGGACCAGGGUUCAUUCCCC | 21 | 0 | 0 | 0 | 0 | 0 | 0 | UUGGACCAGGCUUCAUUCCCC | 21 | 0 | 0 | 0 | 0 | 0 | 0 | CGGACCAGGCUUCAUUCCUC | 20 | 0 | 0 | 0 | 0 | 0 | 0 | UCUCGGAACAGGCUUCAUUCC | 21 | 0 | 0 | 0 | 0 | 0 | 0 | UAGGACCAGGCUUCAUUCCCC | 21 | 0 | 0 | 0 | 0 | 0 | 0 | UCGGACCAGGCUUCAUUUUU | 20 | 0 | 0 | 0 | 0 | 0 | 0 | UCGGACCAGGCUUCCCCCCC | 20 | 0 | 0 | 0 | 0 | 0 | 0 | UCGGACCAGGCCUUAUUCCUC | 21 | 0 | 0 | 0 | 0 | 0 | 0 | UCGGACCAGGCUUGAUUCCCC | 21 | 0 | 0 | 0 | 0 | 0 | 0 | UCGGACCAGGCUUCACUCCUC | 21 | 0 | 0 | 0 | 0 | 0 | 0 | UCGGACCAGGCCUUAUUCCCC | 21 | 0 | 0 | 0 | 0 | 0 | 0 | UCGGACAAGGCUUCAUUCCCC | 21 | 0 | 0 | 0 | 0 | 0 | 0 | UCUUCGGACCAGGCUUCAUUC | 21 | 0 | 0 | 0 | 0 | 0 | 0 | UCUCGGACCAGGCUUCAUUAC | 21 | 0 | 0 | 0 | 0 | 0 | 0 | UCGGACCAGGCUUCAUUCCUCA | 22 | 0 | 0 | 0 | 0 | 0 | 0 | UCGGACCAGGCUUCAUUCCGC | 21 | 0 | 0 | 0 | 0 | 0 | 0 | UCGGACCAGGCUUACUUCCCC | 21 | 0 | 0 | 0 | 0 | 0 | 0 | UCGGACCAGGCUUCAUUUUUU | 21 | 0 | 0 | 0 | 0 | 0 | 0 | UCGGACCAGGCUUCAUUCCCCU | 22 | 0 | 0 | 0 | 0 | 0 | 0 | UCGGACCAGGUUUCAUUCCCC | 21 | 0 | 0 | 0 | 0 | 0 | 0 | CCGGACCAGGCUUCAUUCCCC | 21 | 0 | 0 | 0 | 0 | 0 | 0 | UCGGACCAGGCUCAUUCCCC | 20 | 0 | 0 | 0 | 0 | 0 | 0 | AUCGGACCAGGCUUCAUUCCCC | 22 | 0 | 0 | 0 | 0 | 0 | 0 | UCGGACCAGGCUCCAUUCCUC | 21 | 0 | 0 | 0 | 0 | 0 | 0 | UCGGACCAGGCUUAUUCCCC | 20 | 0 | 0 | 0 | 0 | 0 | 0 | UCUCGGACCAGGCUUCAUUCA | 21 | 0 | 0 | 0 | 0 | 0 | 0 | UCAGACCAGGCUUCAUUCCCC | 21 | 0 | 0 | 0 | 0 | 0 | 0 | UCGGGCCAGGCUUCAUUCCUC | 21 | 0 | 0 | 0 | 0 | 0 | 0 |
