# Supplementary material for: The tomato genome sequence provides insights into fleshy fruit evolution
Source: Springer Nature journal article supplement (doi:10.1038/nature11119), 2012-05-01
Supplement: 41586_2012_BFnature11119_MOESM69_ESM.zip [file 41586_2012_BFnature11119_MOESM69_ESM.zip › Supplementary_HTM_tables/Supplementary_HTM_Table_13_miR167_S01.htm]

|  |  |  |  |  |  |  |  |
| --- | --- | --- | --- | --- | --- | --- | --- |
| miRNA\_VARIANT\_SEQUENCE | Sz | L | L | L | L | L | L |
 UGAAGCUGCCAGCAUGAUCUA | 21 | 0 | 0 | 0 | 0 | 0 | 0 | UGAAGCUGCCAGCAUGAUCUAA | 22 | 0 | 0 | 0 | 0 | 0 | 0 | UGAAGCUGCCAGCAUGAUCUU | 21 | 0 | 0 | 0 | 0 | 0 | 0 | UGAAGCUGCCAGCAUGAUCU | 20 | 0 | 0 | 0 | 0 | 0 | 0 | UGAAGCUGCCAGCAUGCUCUA | 21 | 0 | 0 | 0 | 0 | 0 | 0 | UGAAGCUGCCAGCAUGAUCUC | 21 | 0 | 0 | 0 | 0 | 0 | 0 | UGAAGCUGCCAGCCUGAUCUA | 21 | 0 | 0 | 0 | 0 | 0 | 0 | UGAAGCUGCUAGCAUGAUCUA | 21 | 0 | 0 | 0 | 0 | 0 | 0 | UGAAGCUGCCAGCAUGAUCUAU | 22 | 0 | 0 | 0 | 0 | 0 | 0 | UAAAGCUGCCAGCAUGAUCUGG | 22 | 0 | 0 | 0 | 0 | 0 | 0 | UGAAGCUGUCAGCAUGAUCUA | 21 | 0 | 0 | 0 | 0 | 0 | 0 | UGAAGCUGCCAGCAUGAUAUA | 21 | 0 | 0 | 0 | 0 | 0 | 0 | UGCAGCUGCCAGCAUGAUCUA | 21 | 0 | 0 | 0 | 0 | 0 | 0 | UUAAAGCUGCCAGCAUGAUCUG | 22 | 0 | 0 | 0 | 0 | 0 | 0 | UGAAGCUGCCAGCAUUAUCUA | 21 | 0 | 0 | 0 | 0 | 0 | 0 | UGAAGCUGCCAGCAUGUUCUA | 21 | 0 | 0 | 0 | 0 | 0 | 0 | UGAAGCUGCCCGCAUGAUCUA | 21 | 0 | 0 | 0 | 0 | 0 | 0 | UGAAGCUGCCAGCAUGGUCUA | 21 | 0 | 0 | 0 | 0 | 0 | 0 | UGAAGCUGCCAGCAUGAUCUAC | 22 | 0 | 0 | 0 | 0 | 0 | 0 | UGAAGCUGCCAGCAUCAUCUA | 21 | 0 | 0 | 0 | 0 | 0 | 0 | UGAAGCUGCCAGCAUGAUUA | 20 | 0 | 0 | 0 | 0 | 0 | 0 | UGAAGCUGCCAGCAUGAUCUAAA | 23 | 0 | 0 | 0 | 0 | 0 | 0 | UGAAUCUGCCAGCAUGAUCUA | 21 | 0 | 0 | 0 | 0 | 0 | 0 | UGAAGUUGCCAGCAUGAUCUA | 21 | 0 | 0 | 0 | 0 | 0 | 0 | UGAAGCUGCCAGCUUGAUCUA | 21 | 0 | 0 | 0 | 0 | 0 | 0 | UGAAGCUGCCAGCACGAUCUA | 21 | 0 | 0 | 0 | 0 | 0 | 0 | UGAAGAUGCCAGCAUGAUCUA | 21 | 0 | 0 | 0 | 0 | 0 | 0 | UGAAGCUGUUAGCAUGAUCUA | 21 | 0 | 0 | 0 | 0 | 0 | 0 | UGAAGCUGCCAGCGUGAUCUA | 21 | 0 | 0 | 0 | 0 | 0 | 0 | UGAAGCUUCCAGCAUGAUCUA | 21 | 0 | 0 | 0 | 0 | 0 | 0 | UGAAGCUGCCAGAAUGAUCUA | 21 | 0 | 0 | 0 | 0 | 0 | 0 | UGGAGCUGCCAGCAUGAUCUA | 21 | 0 | 0 | 0 | 0 | 0 | 0 | CGAAGCUGCCAGCAUGAUCUA | 21 | 0 | 0 | 0 | 0 | 0 | 0 | UGAGGCUGCCAGCAUGAUCUA | 21 | 0 | 0 | 0 | 0 | 0 | 0 | UGAAGCUGCCAGCAUGAUCUG | 21 | 0 | 0 | 0 | 0 | 0 | 0 | UGAAGCUACCAGCAUGAUCUA | 21 | 0 | 0 | 0 | 0 | 0 | 0 | UGAAGCUGCUAGCAUGAUCUAA | 22 | 0 | 0 | 0 | 0 | 0 | 0 | UGAAGCUGCCAGCAUGAUUUA | 21 | 0 | 0 | 0 | 0 | 0 | 0 | UGAAGCUGCCGGCAUGAUCUA | 21 | 0 | 0 | 0 | 0 | 0 | 0 | UGACGCUGCCAGCAUGAUCUA | 21 | 0 | 0 | 0 | 0 | 0 | 0 | UGAAGCUGCCAGCAUGACCUA | 21 | 0 | 0 | 0 | 0 | 0 | 0 | UGAAGCUGCCAGCAUAAUCUA | 21 | 0 | 0 | 0 | 0 | 0 | 0 | UGAAGCUGCCAUCAUGAUCUA | 21 | 0 | 0 | 0 | 0 | 0 | 0 | AAUGAAGCUGCCAGCAUGAUCUA | 23 | 0 | 0 | 0 | 0 | 0 | 0 | UGAAGCCGCCAGCAUGAUCUA | 21 | 0 | 0 | 0 | 0 | 0 | 0 | UGAAGCUGACAGCAUGAUCUA | 21 | 0 | 0 | 0 | 0 | 0 | 0 | UGAAGCUGCAAGCAUGAUCUA | 21 | 0 | 0 | 0 | 0 | 0 | 0 | UGAAGCUGCCAACAUGAUCUA | 21 | 0 | 0 | 0 | 0 | 0 | 0 | GAAGCUGCCAGCAUGAUCUA | 20 | 0 | 0 | 0 | 0 | 0 | 0 | UGAAGCUGCCAGCAUGAGCUA | 21 | 0 | 0 | 0 | 0 | 0 | 0 | CUGAAGCUGCCAGCAUGAUCUA | 22 | 0 | 0 | 0 | 0 | 0 | 0 | UGAACCUGCCAGCAUGAUCUA | 21 | 0 | 0 | 0 | 0 | 0 | 0 | UGAAGCUGCCAGCAUGAUCCA | 21 | 0 | 0 | 0 | 0 | 0 | 0 | UAAAGCUGCCAGCAUGAUCUA | 21 | 0 | 0 | 0 | 0 | 0 | 0 | UGAAGCUGUCAGCAUGAUCUAA | 22 | 0 | 0 | 0 | 0 | 0 | 0 | UGAAGCUGCCAGCCUGAUCUAA | 22 | 0 | 0 | 0 | 0 | 0 | 0 | UGAAACUGCCAGCAUGAUCUA | 21 | 0 | 0 | 0 | 0 | 0 | 0 | UGAAGCUGCCAGCAUGCUCUC | 21 | 0 | 0 | 0 | 0 | 0 | 0 | UGAAGCUGCCAGCAUGCUCUAA | 22 | 0 | 0 | 0 | 0 | 0 | 0 | UCAAGCUGCCAGCAUGAUCUA | 21 | 0 | 0 | 0 | 0 | 0 | 0 | UUAAGCUGCCAGCAUGAUCUA | 21 | 0 | 0 | 0 | 0 | 0 | 0 | UGAAGCUGCCAGCAUGAUCUAAU | 23 | 0 | 0 | 0 | 0 | 0 | 0 | UGAAGUCGCCAGCAUGAUCUA | 21 | 0 | 0 | 0 | 0 | 0 | 0 | UGAAGCUGCCACCAUGAUCUA | 21 | 0 | 0 | 0 | 0 | 0 | 0 | UGAAGCUCCCAGCAUGAUCUA | 21 | 0 | 0 | 0 | 0 | 0 | 0 | UGAAGCUGCCAGCAGGAUCUA | 21 | 0 | 0 | 0 | 0 | 0 | 0 | UGAAGCUGCCAGUAUGAUCUA | 21 | 0 | 0 | 0 | 0 | 0 | 0 | UGAAGCUGCCAGCCUGAUAUA | 21 | 0 | 0 | 0 | 0 | 0 | 0 | UGAAGCUGCUAGCGUGAUCUA | 21 | 0 | 0 | 0 | 0 | 0 | 0 | UGAAGCUGCCAGCCUGAUCUCA | 22 | 0 | 0 | 0 | 0 | 0 | 0 | UGAAGCUGCCAGCCUGAUCUC | 21 | 0 | 0 | 0 | 0 | 0 | 0 | UGAAGCUGCCCGCAUUAUCUA | 21 | 0 | 0 | 0 | 0 | 0 | 0 | AAUGAAGCUGCCAGCAUGAUCUAU | 24 | 0 | 0 | 0 | 0 | 0 | 0 | UGAAGCUGCUAGCAUGAUCUC | 21 | 0 | 0 | 0 | 0 | 0 | 0 | UUAAAGCUGCCAGCAUGAUC | 20 | 0 | 0 | 0 | 0 | 0 | 0 | UGAAGAUGCAAGCAUGAUCUA | 21 | 0 | 0 | 0 | 0 | 0 | 0 | AUGAAGCUGCCAGCAUGAUCUA | 22 | 0 | 0 | 0 | 0 | 0 | 0 | UGAAGCUGCGAGCAUGAUCUA | 21 | 0 | 0 | 0 | 0 | 0 | 0 | UGAAGCUGCCAACAUGAUCUAA | 22 | 0 | 0 | 0 | 0 | 0 | 0 | UGAAGCUUCCAUCAUGAUCUA | 21 | 0 | 0 | 0 | 0 | 0 | 0 | UGAAGCUGCCAGCUUGUUCUA | 21 | 0 | 0 | 0 | 0 | 0 | 0 | UGAAGCUCCCAGCAUGAUCUU | 21 | 0 | 0 | 0 | 0 | 0 | 0 | GGAAGCUGCCAGCAUGAUCUC | 21 | 0 | 0 | 0 | 0 | 0 | 0 | UGAAGCUCCCAGCAUGAUCUAA | 22 | 0 | 0 | 0 | 0 | 0 | 0 | UGAGGCUGCCAGCAUGAUCUU | 21 | 0 | 0 | 0 | 0 | 0 | 0 | UGAAGCUGCCCGCAUGAUCUC | 21 | 0 | 0 | 0 | 0 | 0 | 0 | UGAACUGCCAGCAUGAUCUA | 20 | 0 | 0 | 0 | 0 | 0 | 0 | UGAAGCUGCCAGACUGAUCUA | 21 | 0 | 0 | 0 | 0 | 0 | 0 | UGAAGCUGCCAGCAUAAUCU | 20 | 0 | 0 | 0 | 0 | 0 | 0 | UAUAGCUGCCAGCAUGAUCUA | 21 | 0 | 0 | 0 | 0 | 0 | 0 | UGAAGCUGCCAGCAUGAUCUAAAU | 24 | 0 | 0 | 0 | 0 | 0 | 0 | UGAAGCUGCCAGGAUGAUCUA | 21 | 0 | 0 | 0 | 0 | 0 | 0 | UGAAGCUGCUAGCAUGCUCUA | 21 | 0 | 0 | 0 | 0 | 0 | 0 | UGCAGCUGCCAGCAUGAUCUUA | 22 | 0 | 0 | 0 | 0 | 0 | 0 | UGAAGCUGCCAGCAUGAUCUUA | 22 | 0 | 0 | 0 | 0 | 0 | 0 | AAGCUGCCAGCAUGAUCUAAAC | 22 | 0 | 0 | 0 | 0 | 0 | 0 | CUGAAGCUGCCAGCAUGAUCUAA | 23 | 0 | 0 | 0 | 0 | 0 | 0 | UGAAGCUGCCAGCAUGAUGUAA | 22 | 0 | 0 | 0 | 0 | 0 | 0 | UGAAGCUGCAAGAAUGAUCUA | 21 | 0 | 0 | 0 | 0 | 0 | 0 | UGAAGUUGCCAGCAUGAUCU | 20 | 0 | 0 | 0 | 0 | 0 | 0 | UGAAUUUGCCAGCAUGAUCUA | 21 | 0 | 0 | 0 | 0 | 0 | 0 |
