# Supplementary material for: The tomato genome sequence provides insights into fleshy fruit evolution
Source: Springer Nature journal article supplement (doi:10.1038/nature11119), 2012-05-01
Supplement: 41586_2012_BFnature11119_MOESM69_ESM.zip [file 41586_2012_BFnature11119_MOESM69_ESM.zip › Supplementary_HTM_tables/Supplementary_HTM_Table_14_miR167_S02.htm]

|  |  |  |  |  |  |  |  |
| --- | --- | --- | --- | --- | --- | --- | --- |
| miRNA\_VARIANT\_SEQUENCE | Sz | L | L | L | L | L | L |
 UCAGAUCAUGUGGUUGCUUCA | 21 | 0 | 0 | 0 | 0 | 0 | 0 | AGAUCAUGUGGUUGCUUCACC | 21 | 0 | 0 | 0 | 0 | 0 | 0 | UCAGAUCAUGUGGUUGCUUC | 20 | 0 | 0 | 0 | 0 | 0 | 0 | UCAGAUCAUGUGGCAGCAUCACC | 23 | 0 | 0 | 0 | 0 | 0 | 0 | CAGAUCAUGUGGCAGCAUCACC | 22 | 0 | 0 | 0 | 0 | 0 | 0 | AGAUCAUGUGGUUGAUUCACC | 21 | 0 | 0 | 0 | 0 | 0 | 0 | AGAUCAUGUGGUUGUUUCACC | 21 | 0 | 0 | 0 | 0 | 0 | 0 | AGAUCAUGUGGCAGCCUCACC | 21 | 0 | 0 | 0 | 0 | 0 | 0 | UCAGAUCAUGUGGCAGCAUC | 20 | 0 | 0 | 0 | 0 | 0 | 0 | CAGAUCAUGUGGUUGCUUCA | 20 | 0 | 0 | 0 | 0 | 0 | 0 | CAGAUCAUGUGGUUGCUUCACC | 22 | 0 | 0 | 0 | 0 | 0 | 0 | AGAUCAUGUGGUAGCUUCACC | 21 | 0 | 0 | 0 | 0 | 0 | 0 | GAUCAUGUGGUUGCUUCACC | 20 | 0 | 0 | 0 | 0 | 0 | 0 | AGAUCAUGUGGCAGCCUUACC | 21 | 0 | 0 | 0 | 0 | 0 | 0 | UCAGAUCAUGUGGUUGCUUCACC | 23 | 0 | 0 | 0 | 0 | 0 | 0 | GAUCAUGUGGCAGCAUCACC | 20 | 0 | 0 | 0 | 0 | 0 | 0 | AGAUCAUGUGGCAGCAUCACC | 21 | 0 | 0 | 0 | 0 | 0 | 0 |
