# Supplementary material for: The tomato genome sequence provides insights into fleshy fruit evolution
Source: Springer Nature journal article supplement (doi:10.1038/nature11119), 2012-05-01
Supplement: 41586_2012_BFnature11119_MOESM69_ESM.zip [file 41586_2012_BFnature11119_MOESM69_ESM.zip › Supplementary_HTM_tables/Supplementary_HTM_Table_15_miR168_S01.htm]

|  |  |  |  |  |  |  |  |
| --- | --- | --- | --- | --- | --- | --- | --- |
| miRNA\_VARIANT\_SEQUENCE | Sz | L | L | L | L | L | L |
 UCGCUUGGUGCAGGUCGGGAC | 21 | 0 | 0 | 0 | 0 | 0 | 0 | UCGCUUGGUGCAGGUCGGGACC | 22 | 0 | 0 | 0 | 0 | 0 | 0 | UCGCUUGGUGCAGAUCGGGAC | 21 | 0 | 0 | 0 | 0 | 0 | 0 | UCGCUUGGUGCAGGUCGGGGC | 21 | 0 | 0 | 0 | 0 | 0 | 0 | UCGCUUGGUGCAGGUCGGGCC | 21 | 0 | 0 | 0 | 0 | 0 | 0 | UCGCUUGGUGCAGGUCGGGUC | 21 | 0 | 0 | 0 | 0 | 0 | 0 | UCGCUUGGUGCAGGUCGGGACCUA | 24 | 0 | 0 | 0 | 0 | 0 | 0 | UCGCUUGGUGCAGGUCGGUAC | 21 | 0 | 0 | 0 | 0 | 0 | 0 | UCGCUUGGUGCAGGUCGUGAC | 21 | 0 | 0 | 0 | 0 | 0 | 0 | UCGCUUGGUGCAGGGCGGGAC | 21 | 0 | 0 | 0 | 0 | 0 | 0 | UCGCUUGGUGCAGGUCUGGAC | 21 | 0 | 0 | 0 | 0 | 0 | 0 | UCGCUUGGUGCAGAUCGGGACA | 22 | 0 | 0 | 0 | 0 | 0 | 0 | UCGCUUGGUGCAGAUCGGGACAA | 23 | 0 | 0 | 0 | 0 | 0 | 0 | UCGCUUGGUGCAGGUCGGGA | 20 | 0 | 0 | 0 | 0 | 0 | 0 | UCGCUUGGUGCAUGUCGGGAC | 21 | 0 | 0 | 0 | 0 | 0 | 0 | UCGCUUGGUGCAGUUCGGGAC | 21 | 0 | 0 | 0 | 0 | 0 | 0 | UCGCUUGGUGCAGGUCGGGACAA | 23 | 0 | 0 | 0 | 0 | 0 | 0 | UCGCUUGGUGCAGGUCGGGAU | 21 | 0 | 0 | 0 | 0 | 0 | 0 | UCGCUUGGUGCAGGCCGGGAC | 21 | 0 | 0 | 0 | 0 | 0 | 0 | UCGCUUGGUGCAGGUAGGGAC | 21 | 0 | 0 | 0 | 0 | 0 | 0 | UCGCUUGGUGCAGGUCGGGACA | 22 | 0 | 0 | 0 | 0 | 0 | 0 | UUGCUUGGUGCAGGUCGGGAC | 21 | 0 | 0 | 0 | 0 | 0 | 0 | UCGCUUGGUGCAGAUCGGGGAC | 22 | 0 | 0 | 0 | 0 | 0 | 0 | UCGCUUGGUGCAGGUUGGGAC | 21 | 0 | 0 | 0 | 0 | 0 | 0 | UCGCUUGGUGCAGGUCGGGGCC | 22 | 0 | 0 | 0 | 0 | 0 | 0 | UCGCUUGGUGCAGGUCGGCAC | 21 | 0 | 0 | 0 | 0 | 0 | 0 | UCGCUUGGUGCAGGUCGGGAA | 21 | 0 | 0 | 0 | 0 | 0 | 0 | UCGCUUGUGCAGGUCGGGAC | 20 | 0 | 0 | 0 | 0 | 0 | 0 | UCGCUUGGUGCAGGUCGCGAC | 21 | 0 | 0 | 0 | 0 | 0 | 0 | UCGCUUGGUGCAGGUCGGGCCC | 22 | 0 | 0 | 0 | 0 | 0 | 0 | UCGCUUGGUGCAGGUCGGGACCU | 23 | 0 | 0 | 0 | 0 | 0 | 0 | UCGCUUGGGGCAGGUCGGGAC | 21 | 0 | 0 | 0 | 0 | 0 | 0 | UCGCUUGGUGCAGCUCGGGAC | 21 | 0 | 0 | 0 | 0 | 0 | 0 | UCGCUUGGUGCAGAUCGGGA | 20 | 0 | 0 | 0 | 0 | 0 | 0 | UCGCUUGGUGCAGGUCGUGCC | 21 | 0 | 0 | 0 | 0 | 0 | 0 | UAGCUUGGUGCAGGUCGGGAC | 21 | 0 | 0 | 0 | 0 | 0 | 0 | UCGCUUGGCGCAGGUCGGGAC | 21 | 0 | 0 | 0 | 0 | 0 | 0 | UCGCUUGGUGCAGGUCGGGUCC | 22 | 0 | 0 | 0 | 0 | 0 | 0 | UCGCUUUGUGCAGGUCGGGAC | 21 | 0 | 0 | 0 | 0 | 0 | 0 | CCGCUUGGUGCAGGUCGGGAC | 21 | 0 | 0 | 0 | 0 | 0 | 0 | UCGCUUGGUGCAGGUCGGGACU | 22 | 0 | 0 | 0 | 0 | 0 | 0 | CGCUUGGUGCAGGUCGGGAC | 20 | 0 | 0 | 0 | 0 | 0 | 0 | UCGCUUGGUGCAGGUCCGGAC | 21 | 0 | 0 | 0 | 0 | 0 | 0 | UCGCUUGGUGCAGGACGGGAC | 21 | 0 | 0 | 0 | 0 | 0 | 0 | UCGCUUGGUGCACGUCGGGAC | 21 | 0 | 0 | 0 | 0 | 0 | 0 | CUCGCUUGGUGCAGGUCGGGAC | 22 | 0 | 0 | 0 | 0 | 0 | 0 | ACGCUUGGUGCAGGUCGGGAC | 21 | 0 | 0 | 0 | 0 | 0 | 0 | UCGCUGGUGCAGGUCGGGAC | 20 | 0 | 0 | 0 | 0 | 0 | 0 | GCUUGGUGCAGGUCGGGACC | 20 | 0 | 0 | 0 | 0 | 0 | 0 | UCGCUUGGUGCAGGUCGGGAAC | 22 | 0 | 0 | 0 | 0 | 0 | 0 | UCGCUUGGUGUAGGUCGGGAC | 21 | 0 | 0 | 0 | 0 | 0 | 0 | UCUCUUGGUGCAGGUCGGGAC | 21 | 0 | 0 | 0 | 0 | 0 | 0 | UCGCUUGGUACAGGUCGGGAC | 21 | 0 | 0 | 0 | 0 | 0 | 0 | UCACUUGGUGCAGGUCGGGAC | 21 | 0 | 0 | 0 | 0 | 0 | 0 | AAUCGCUUGGUGCAGGUCGGGAC | 23 | 0 | 0 | 0 | 0 | 0 | 0 | UCGCUUGGUGCAGGUCGGAC | 20 | 0 | 0 | 0 | 0 | 0 | 0 | UCGCUUGGUGCCGGUCGGGAC | 21 | 0 | 0 | 0 | 0 | 0 | 0 | UCGUUUGGUGCAGGUCGGGAC | 21 | 0 | 0 | 0 | 0 | 0 | 0 | UCGCUUGGUGCUGGUCGGGAC | 21 | 0 | 0 | 0 | 0 | 0 | 0 | UCGCUUGGUGCAGGUCGUGACC | 22 | 0 | 0 | 0 | 0 | 0 | 0 | UCGAUUGGUGCAGGUCGGGAC | 21 | 0 | 0 | 0 | 0 | 0 | 0 | UCGCUUGGUGCAUGUCGGGACC | 22 | 0 | 0 | 0 | 0 | 0 | 0 | UCGCUCGGUGCAGGUCGGGAC | 21 | 0 | 0 | 0 | 0 | 0 | 0 | UCGCUUGGUGCAGGUCAGGAC | 21 | 0 | 0 | 0 | 0 | 0 | 0 | UCGCUUGGGGCAGGGCGGGAC | 21 | 0 | 0 | 0 | 0 | 0 | 0 | UCGCUUGGUGCAGGUCGUGGA | 21 | 0 | 0 | 0 | 0 | 0 | 0 | UCGCUUGGAGCAGAUCGGGAC | 21 | 0 | 0 | 0 | 0 | 0 | 0 | UCGCUUGGGGCAGGUCGGGGC | 21 | 0 | 0 | 0 | 0 | 0 | 0 | UCGCUUGGUGCAGGUCGGGACUCG | 24 | 0 | 0 | 0 | 0 | 0 | 0 | UCGCUUGGUGCAGAUAGGGAU | 21 | 0 | 0 | 0 | 0 | 0 | 0 | UCGCUUGGGGCAGAUCGGGAC | 21 | 0 | 0 | 0 | 0 | 0 | 0 | UCGCUUGGUGCUGGUCGGGGC | 21 | 0 | 0 | 0 | 0 | 0 | 0 | UCGCUUGGUGCAGGUCGGGAGC | 22 | 0 | 0 | 0 | 0 | 0 | 0 | ACGCUUGGUGCAGAUCGGGAC | 21 | 0 | 0 | 0 | 0 | 0 | 0 | UCGCUUGGUGCAGGUCGGGACUCA | 24 | 0 | 0 | 0 | 0 | 0 | 0 | UCGCUUGGUGCAGGACGGGCC | 21 | 0 | 0 | 0 | 0 | 0 | 0 | UCGCUUGGUGCAGGGCGGGCA | 21 | 0 | 0 | 0 | 0 | 0 | 0 | UCGCUUGGUGCAGGUCGGGAAA | 22 | 0 | 0 | 0 | 0 | 0 | 0 | UCGCUUGGUGCAGGACGGGAA | 21 | 0 | 0 | 0 | 0 | 0 | 0 | UCGCUUGGUGCAGGGCGGGGC | 21 | 0 | 0 | 0 | 0 | 0 | 0 | UCGCUUGGUGCAGAUCGGGCC | 21 | 0 | 0 | 0 | 0 | 0 | 0 | UCGCUUGGUGCAGUACGGGAC | 21 | 0 | 0 | 0 | 0 | 0 | 0 | UCGCUUGGUGCAGAUAGGGAC | 21 | 0 | 0 | 0 | 0 | 0 | 0 | UCGCUUGGUGCAGGUCUGGCA | 21 | 0 | 0 | 0 | 0 | 0 | 0 | UCGCAUGGUGCAGGUCGGGAC | 21 | 0 | 0 | 0 | 0 | 0 | 0 | UCGCUUGGUGCAGGUCGGGACCUC | 24 | 0 | 0 | 0 | 0 | 0 | 0 | UCGCUUGGUGCAGGUCUUGAC | 21 | 0 | 0 | 0 | 0 | 0 | 0 | UCGCUUGGUGCAGGUCGGGCG | 21 | 0 | 0 | 0 | 0 | 0 | 0 | UCGCUUGGUGAAGGUCGGGAC | 21 | 0 | 0 | 0 | 0 | 0 | 0 | UCGCUUUGUGCAGGUCGGUAC | 21 | 0 | 0 | 0 | 0 | 0 | 0 | UCGCUUGGUUCAGGUCUGGAC | 21 | 0 | 0 | 0 | 0 | 0 | 0 | UCGCUUGGUGCAGGUCGGGAAU | 22 | 0 | 0 | 0 | 0 | 0 | 0 | UCGCUGGGUGCAGGUCGGGAC | 21 | 0 | 0 | 0 | 0 | 0 | 0 | UCGCUUGGUCCAGGUCGGGAC | 21 | 0 | 0 | 0 | 0 | 0 | 0 | UCGCUUGGUGUAGGUCGGGACC | 22 | 0 | 0 | 0 | 0 | 0 | 0 | UCGCGUGGUGCAGGUCGGGACC | 22 | 0 | 0 | 0 | 0 | 0 | 0 | UCCCUUGGUGCAGGUCGGGACC | 22 | 0 | 0 | 0 | 0 | 0 | 0 | CCGCUUGGUGCAGAUCGGGAU | 21 | 0 | 0 | 0 | 0 | 0 | 0 | UCGUUUGGUGCAGAUCGGGAC | 21 | 0 | 0 | 0 | 0 | 0 | 0 | UCGCUUGGUGCAGGUGGGGCC | 21 | 0 | 0 | 0 | 0 | 0 | 0 | UCGCUUGGUGCAGGUCGGGUG | 21 | 0 | 0 | 0 | 0 | 0 | 0 |
