# Supplementary material for: The tomato genome sequence provides insights into fleshy fruit evolution
Source: Springer Nature journal article supplement (doi:10.1038/nature11119), 2012-05-01
Supplement: 41586_2012_BFnature11119_MOESM69_ESM.zip [file 41586_2012_BFnature11119_MOESM69_ESM.zip › Supplementary_HTM_tables/Supplementary_HTM_Table_16_miR168_S02.htm]

|  |  |  |  |  |  |  |  |
| --- | --- | --- | --- | --- | --- | --- | --- |
| miRNA\_VARIANT\_SEQUENCE | Sz | L | L | L | L | L | L |
 CCCGCCUUGCAUCAACUGAAU | 21 | 0 | 0 | 0 | 0 | 0 | 0 | UCCCGCCUUGCAUCAACUGAAU | 22 | 0 | 0 | 0 | 0 | 0 | 0 | UCCUGCCUUGCAUCAACUGAAU | 22 | 0 | 0 | 0 | 0 | 0 | 0 | CCUGCCUUGCAUCAACUGAAU | 21 | 0 | 0 | 0 | 0 | 0 | 0 | CCUGCCUUGCAUCAACUGAAUU | 22 | 0 | 0 | 0 | 0 | 0 | 0 | UGGGUCCCGCCUUGCAUCAAC | 21 | 0 | 0 | 0 | 0 | 0 | 0 | CCCGCCUUGCAUCAACUGAA | 20 | 0 | 0 | 0 | 0 | 0 | 0 | CCCGCCUUGCAUCAACUGAAUU | 22 | 0 | 0 | 0 | 0 | 0 | 0 | UCCCGCCUUGCAUCAACUGAA | 21 | 0 | 0 | 0 | 0 | 0 | 0 | CUCGCCUUGCAUCAACUGAAU | 21 | 0 | 0 | 0 | 0 | 0 | 0 | UCCCGCCUUGCAUCAACUGACU | 22 | 0 | 0 | 0 | 0 | 0 | 0 | UCCCGCCUUGCAUCCACUGAAU | 22 | 0 | 0 | 0 | 0 | 0 | 0 | CCCGCCUUUCAUCAACUGAAU | 21 | 0 | 0 | 0 | 0 | 0 | 0 | CCCGCCUUGCAUCAACUUAAU | 21 | 0 | 0 | 0 | 0 | 0 | 0 | UCCCGCUUUGCAUCAACUGAAU | 22 | 0 | 0 | 0 | 0 | 0 | 0 | CCCGCCUUGCACCAACUGAAU | 21 | 0 | 0 | 0 | 0 | 0 | 0 | CUGCCUUGCAUCAACUGAAU | 20 | 0 | 0 | 0 | 0 | 0 | 0 | UUCCGCCUUGCAUCAACUGAAU | 22 | 0 | 0 | 0 | 0 | 0 | 0 | UCCUGCCUUGCAUCAACUGAAUU | 23 | 0 | 0 | 0 | 0 | 0 | 0 | CCCGCCUUGCAUCAACUGCAU | 21 | 0 | 0 | 0 | 0 | 0 | 0 | CCCGUCUUGCAUCAACUGAAU | 21 | 0 | 0 | 0 | 0 | 0 | 0 | UCCUGCCUUGCAUCAACUGAA | 21 | 0 | 0 | 0 | 0 | 0 | 0 | CCCGCCUUGCAUCAUCUGAAU | 21 | 0 | 0 | 0 | 0 | 0 | 0 | UCCCGCCUUGCAUCAACUGCA | 21 | 0 | 0 | 0 | 0 | 0 | 0 | CCGCCUUGCAUCAACUGAAU | 20 | 0 | 0 | 0 | 0 | 0 | 0 | CCCGCCUUGCAUCAACCGAAU | 21 | 0 | 0 | 0 | 0 | 0 | 0 | CCCGCCUUGCAUCAACUGAAC | 21 | 0 | 0 | 0 | 0 | 0 | 0 | CCCGCCUUGCAUCAACUGAU | 20 | 0 | 0 | 0 | 0 | 0 | 0 | UCCCGCCUUGCAUCACCUGAAU | 22 | 0 | 0 | 0 | 0 | 0 | 0 | CCUGCCUUGCAUCAACUGAA | 20 | 0 | 0 | 0 | 0 | 0 | 0 | ACCGCCUUGCAUCAACUGAAU | 21 | 0 | 0 | 0 | 0 | 0 | 0 | CCCGCCUUGCCUCAACUGAAU | 21 | 0 | 0 | 0 | 0 | 0 | 0 | CCUGCCUUGCAUCAACUGAAUUU | 23 | 0 | 0 | 0 | 0 | 0 | 0 | UCCCGCCUUGCAUCAACUGUAU | 22 | 0 | 0 | 0 | 0 | 0 | 0 | CCCGCCUUGCAUCAAAUGAAU | 21 | 0 | 0 | 0 | 0 | 0 | 0 | UCCCGCCUUGCAUCAACUUAAU | 22 | 0 | 0 | 0 | 0 | 0 | 0 | CCCGCCUUGCAUCACCUGAAU | 21 | 0 | 0 | 0 | 0 | 0 | 0 | GGUCCCGCCUUGCAUCAACUGAAU | 24 | 0 | 0 | 0 | 0 | 0 | 0 | UCCCGCCUUGCAUCAACUGAU | 21 | 0 | 0 | 0 | 0 | 0 | 0 | CCCGCCUUGCAUCAACUGACU | 21 | 0 | 0 | 0 | 0 | 0 | 0 | CCCGCCUUGCAUCCACUGAAU | 21 | 0 | 0 | 0 | 0 | 0 | 0 | CCCGCCUUGCAUCAACUGAUU | 21 | 0 | 0 | 0 | 0 | 0 | 0 | CCGCCUUGCAUCAACUGAAUC | 21 | 0 | 0 | 0 | 0 | 0 | 0 | UGAAUCCCGCCUUGCAUCAAC | 21 | 0 | 0 | 0 | 0 | 0 | 0 | CCGCCUUGCAUCAACUGAAC | 20 | 0 | 0 | 0 | 0 | 0 | 0 | UCCCGCCUUGCAUCAACUGA | 20 | 0 | 0 | 0 | 0 | 0 | 0 | CCCGCCUUGCAUCAACUGAAA | 21 | 0 | 0 | 0 | 0 | 0 | 0 | CCCCCUUGCAUCAACUGAAU | 20 | 0 | 0 | 0 | 0 | 0 | 0 | UCCGCCUUGCAUCAACUGAAU | 21 | 0 | 0 | 0 | 0 | 0 | 0 | CCCCGCCUUGCAUCAACUGAAU | 22 | 0 | 0 | 0 | 0 | 0 | 0 | CCCGCCUUGCAUCAACUGAGU | 21 | 0 | 0 | 0 | 0 | 0 | 0 | UCCUGCCUUGCAUCAACUGAAUUU | 24 | 0 | 0 | 0 | 0 | 0 | 0 | CCCGCCUUGCAUCAACUGAAUC | 22 | 0 | 0 | 0 | 0 | 0 | 0 | UCCCGCCUUGCAUCAACUGCAU | 22 | 0 | 0 | 0 | 0 | 0 | 0 | UCCCGCCUUGCAUCAACUGAAA | 22 | 0 | 0 | 0 | 0 | 0 | 0 | UCCCGCCUUGCAUCAACUGAAUU | 23 | 0 | 0 | 0 | 0 | 0 | 0 | UCCCGCCUUGCAUCAACUAAAU | 22 | 0 | 0 | 0 | 0 | 0 | 0 | UCUCGCCUUGCAUCAACUGAAU | 22 | 0 | 0 | 0 | 0 | 0 | 0 |
