# Supplementary material for: The tomato genome sequence provides insights into fleshy fruit evolution
Source: Springer Nature journal article supplement (doi:10.1038/nature11119), 2012-05-01
Supplement: 41586_2012_BFnature11119_MOESM69_ESM.zip [file 41586_2012_BFnature11119_MOESM69_ESM.zip › Supplementary_HTM_tables/Supplementary_HTM_Table_17_miR169_S01.htm]

|  |  |  |  |  |  |  |  |
| --- | --- | --- | --- | --- | --- | --- | --- |
| miRNA\_VARIANT\_SEQUENCE | Sz | L | L | L | L | L | L |
 CAGCCAAGGAUGACUUGCCG | 20 | 0 | 0 | 0 | 0 | 0 | 0 | CAGCCAAGGAUGACUUGCCGG | 21 | 0 | 0 | 0 | 0 | 0 | 0 | CAGCCAAGGAUGACUUGCUGG | 21 | 0 | 0 | 0 | 0 | 0 | 0 | AGCCAGGGAUGACUUGCCGA | 20 | 0 | 0 | 0 | 0 | 0 | 0 | CAGCCAAGGAUGACUUGCCGA | 21 | 0 | 0 | 0 | 0 | 0 | 0 | AGCCAAGGAUGACUUGCCGAG | 21 | 0 | 0 | 0 | 0 | 0 | 0 | CAGCCAGGGAUGACUUGCCGA | 21 | 0 | 0 | 0 | 0 | 0 | 0 | UAGCCAAGGAUGACUUGCCC | 20 | 0 | 0 | 0 | 0 | 0 | 0 | AUAGCCAAGGAUGACUUGCCUG | 22 | 0 | 0 | 0 | 0 | 0 | 0 | AAUAGCCAAGGAUGACUUGCCUG | 23 | 0 | 0 | 0 | 0 | 0 | 0 | CAGCCAAGGAUGACUUGCCGC | 21 | 0 | 0 | 0 | 0 | 0 | 0 | UGCAGCCAAGGAUGACUUGCC | 21 | 0 | 0 | 0 | 0 | 0 | 0 | CAGCCAAGGAUGACUUGUCGG | 21 | 0 | 0 | 0 | 0 | 0 | 0 | UAGCCAAGGAUGACUUGCCUG | 21 | 0 | 0 | 0 | 0 | 0 | 0 | CAGCCAAGGAUGACUUGCCGGA | 22 | 0 | 0 | 0 | 0 | 0 | 0 | CAGCCAGGGAUGACUUGCCG | 20 | 0 | 0 | 0 | 0 | 0 | 0 | CAGCCAAGGAUGAUUUGCCGG | 21 | 0 | 0 | 0 | 0 | 0 | 0 | GCAGCCAAGGAUGACUUGCCG | 21 | 0 | 0 | 0 | 0 | 0 | 0 | ACAAAGAUGACUUGCCUGAUGA | 22 | 0 | 0 | 0 | 0 | 0 | 0 |
