# Supplementary material for: The tomato genome sequence provides insights into fleshy fruit evolution
Source: Springer Nature journal article supplement (doi:10.1038/nature11119), 2012-05-01
Supplement: 41586_2012_BFnature11119_MOESM69_ESM.zip [file 41586_2012_BFnature11119_MOESM69_ESM.zip › Supplementary_HTM_tables/Supplementary_HTM_Table_18_miR171_S01.htm]

|  |  |  |  |  |  |  |  |
| --- | --- | --- | --- | --- | --- | --- | --- |
| miRNA\_VARIANT\_SEQUENCE | Sz | L | L | L | L | L | L |
 UUGAGCCGCGUCAAUAUCUCU | 21 | 0 | 0 | 0 | 0 | 0 | 0 | UGAUUGAGCCGUGCCAAUAUC | 21 | 0 | 0 | 0 | 0 | 0 | 0 | UGAGCCGAACCAAUAUCACUC | 21 | 0 | 0 | 0 | 0 | 0 | 0 | UUGAGCCGUGCCAAUAUCAUA | 21 | 0 | 0 | 0 | 0 | 0 | 0 | UUGAGCCGCGUCAAUAUCUC | 20 | 0 | 0 | 0 | 0 | 0 | 0 | UUGAGCCGCGCCAAUAUCACU | 21 | 0 | 0 | 0 | 0 | 0 | 0 | AUUGAGACGUGACUAUAUUGC | 21 | 0 | 0 | 0 | 0 | 0 | 0 | UUGAGCCGUGCCAAUAUCACG | 21 | 0 | 0 | 0 | 0 | 0 | 0 | UUGAGCCGCGUCACUAUCUCU | 21 | 0 | 0 | 0 | 0 | 0 | 0 | UUGAGCCGCGCCAAUAUCACG | 21 | 0 | 0 | 0 | 0 | 0 | 0 | UUGAGCCGUGCCAAUAUCACGU | 22 | 0 | 0 | 0 | 0 | 0 | 0 | UGAUUGAGCCGUGUCAAUAUC | 21 | 0 | 0 | 0 | 0 | 0 | 0 | UUGAGCCGCGUCAAUCUCUCU | 21 | 0 | 0 | 0 | 0 | 0 | 0 | UGAUUUAGCCGUGCCAAUAUC | 21 | 0 | 0 | 0 | 0 | 0 | 0 | UUGAGCCGCGCCAAUAUCAUU | 21 | 0 | 0 | 0 | 0 | 0 | 0 | UUGAGCCGCGCCAAUAUCAC | 20 | 0 | 0 | 0 | 0 | 0 | 0 | UUAUUGAGCCGUGCCAAUAUC | 21 | 0 | 0 | 0 | 0 | 0 | 0 | UGAUUGAGCCGUGCCAAUAU | 20 | 0 | 0 | 0 | 0 | 0 | 0 | UGAUUGAGCCGCGCCAAUAUC | 21 | 0 | 0 | 0 | 0 | 0 | 0 | UGAUUCAGCCGUGCCAAUAUC | 21 | 0 | 0 | 0 | 0 | 0 | 0 | UGAUUGAGCCGUGACAAUAUC | 21 | 0 | 0 | 0 | 0 | 0 | 0 | UGAUUGAGCCGUGCCACUCUC | 21 | 0 | 0 | 0 | 0 | 0 | 0 | UGAUUGAGCCGUCCCAAUAUC | 21 | 0 | 0 | 0 | 0 | 0 | 0 | CUUUGUUGAGCCGCGCCACG | 20 | 0 | 0 | 0 | 0 | 0 | 0 | UUGAGCCGCGUCAAUAUCUUU | 21 | 0 | 0 | 0 | 0 | 0 | 0 | UGAUUGAGCCGUGCCUAUAUC | 21 | 0 | 0 | 0 | 0 | 0 | 0 | UGAUUGAGCCGUGCCAAUAUU | 21 | 0 | 0 | 0 | 0 | 0 | 0 | UUGAGCCGUGCCAAUAUCAC | 20 | 0 | 0 | 0 | 0 | 0 | 0 | UGAUUGAGCCGUGCCACUAUC | 21 | 0 | 0 | 0 | 0 | 0 | 0 | UGAUUGAGCCGUGCCAAUAUCAA | 23 | 0 | 0 | 0 | 0 | 0 | 0 | UUGAGACGUGACUAUAUUGC | 20 | 0 | 0 | 0 | 0 | 0 | 0 | UUGAGCCGCGUCAAUAUCUCUAA | 23 | 0 | 0 | 0 | 0 | 0 | 0 | UGAUUGAGCCGUACCAAUAUC | 21 | 0 | 0 | 0 | 0 | 0 | 0 | UGAUUGAGUCGUGCCAAUAUC | 21 | 0 | 0 | 0 | 0 | 0 | 0 | AUUGAGCCGCGCCAAUAUCAC | 21 | 0 | 0 | 0 | 0 | 0 | 0 | UGAUUGAGCCGUGCCAAUAUA | 21 | 0 | 0 | 0 | 0 | 0 | 0 | UGAUUGAGCCGUGCCGAUAUC | 21 | 0 | 0 | 0 | 0 | 0 | 0 | UUGAGCCGCGUCAAUAUCUCUU | 22 | 0 | 0 | 0 | 0 | 0 | 0 | UGAUUGAGCCGUGCUAAUAUC | 21 | 0 | 0 | 0 | 0 | 0 | 0 | UUGAGCCGUGCCAAUAUCAUC | 21 | 0 | 0 | 0 | 0 | 0 | 0 | UUGAGCCGCGUCAAUAUCUCUA | 22 | 0 | 0 | 0 | 0 | 0 | 0 | CUGAUUGAGCCGUGCCAAUAUC | 22 | 0 | 0 | 0 | 0 | 0 | 0 | UUGAGCCGCGUCCAUAUCUCU | 21 | 0 | 0 | 0 | 0 | 0 | 0 | UGAUUGAGCCGCGCCACUAUC | 21 | 0 | 0 | 0 | 0 | 0 | 0 | UUGAUUGAGCCGUGCCAAUAUC | 22 | 0 | 0 | 0 | 0 | 0 | 0 | UUGAGCCGCGGCAAUAUCUCU | 21 | 0 | 0 | 0 | 0 | 0 | 0 | AAUUGAGCCGUGCCAAUAUCA | 21 | 0 | 0 | 0 | 0 | 0 | 0 | UGAGCCGUGCCAAUAUCAUCU | 21 | 0 | 0 | 0 | 0 | 0 | 0 | UGAUUGAGCCGUGCCAAUAA | 20 | 0 | 0 | 0 | 0 | 0 | 0 | AAUGAUUGAGCCGUGCCAAUAUC | 23 | 0 | 0 | 0 | 0 | 0 | 0 | UGAUUGAUCCGUGCCAAUAUC | 21 | 0 | 0 | 0 | 0 | 0 | 0 | UUGAGCCGUGCCAAUAUUUU | 20 | 0 | 0 | 0 | 0 | 0 | 0 | UGAUUGAGCCGUGCCAUUAUC | 21 | 0 | 0 | 0 | 0 | 0 | 0 | UGAUUGAGCCGUGCCACUUUC | 21 | 0 | 0 | 0 | 0 | 0 | 0 | UUGAGCCGCGCCAAUAUCACGU | 22 | 0 | 0 | 0 | 0 | 0 | 0 | UGAUUGAGCCGUGCCAAUCUC | 21 | 0 | 0 | 0 | 0 | 0 | 0 |
