# Supplementary material for: The tomato genome sequence provides insights into fleshy fruit evolution
Source: Springer Nature journal article supplement (doi:10.1038/nature11119), 2012-05-01
Supplement: 41586_2012_BFnature11119_MOESM69_ESM.zip [file 41586_2012_BFnature11119_MOESM69_ESM.zip › Supplementary_HTM_tables/Supplementary_HTM_Table_20_miR172_S01.htm]

|  |  |  |  |  |  |  |  |
| --- | --- | --- | --- | --- | --- | --- | --- |
| miRNA\_VARIANT\_SEQUENCE | Sz | L | L | L | L | L | L |
 AGAAUCUUGAUGAUGCUGCAU | 21 | 0 | 0 | 0 | 0 | 0 | 0 | AGAAUCUUGAUGAUGCUGCAG | 21 | 0 | 0 | 0 | 0 | 0 | 0 | GGAAUCUUGAUGAUGCUGCAU | 21 | 0 | 0 | 0 | 0 | 0 | 0 | UGAAUCUUGAUGAUGCUGCAU | 21 | 0 | 0 | 0 | 0 | 0 | 0 | GGGAAUCUUGAUGAUGCUGCA | 21 | 0 | 0 | 0 | 0 | 0 | 0 | GGAAUCUUGAUGAUGCUGCAG | 21 | 0 | 0 | 0 | 0 | 0 | 0 | AGAAUCUUGAUGAUGCUGCA | 20 | 0 | 0 | 0 | 0 | 0 | 0 | AGAAUCUUGAUGAUGCUUCAU | 21 | 0 | 0 | 0 | 0 | 0 | 0 | GAGAAUCUUGAUGAUGCUGCA | 21 | 0 | 0 | 0 | 0 | 0 | 0 | UUGGGAAUCUUGAUGAUGCUG | 21 | 0 | 0 | 0 | 0 | 0 | 0 | GGGAAUCUUGAUGAUGCUGCAU | 22 | 0 | 0 | 0 | 0 | 0 | 0 | AGAAUCUUGAUGAUUCUGCAU | 21 | 0 | 0 | 0 | 0 | 0 | 0 | AGAAUCUUGAUGAUGCUGCCU | 21 | 0 | 0 | 0 | 0 | 0 | 0 | GAGAAUCUUGAUGAUGCUGCAU | 22 | 0 | 0 | 0 | 0 | 0 | 0 | UGAGAAUCUUGAUGAUGCUGC | 21 | 0 | 0 | 0 | 0 | 0 | 0 | AGAAUCUUGAUGAUGAUGCAU | 21 | 0 | 0 | 0 | 0 | 0 | 0 | UGAAUCUUGAUGAUGCUGCA | 20 | 0 | 0 | 0 | 0 | 0 | 0 | GGAAUCUUGAUGAUGCUGCA | 20 | 0 | 0 | 0 | 0 | 0 | 0 | GGAAUCUUGAUGAUUCUGCAU | 21 | 0 | 0 | 0 | 0 | 0 | 0 | AGAAUCUUGAUGAUGCUGAAU | 21 | 0 | 0 | 0 | 0 | 0 | 0 | AGAAUCUUGAUGCUGCUGCAU | 21 | 0 | 0 | 0 | 0 | 0 | 0 | AAAGAAUCUUGAUGAUGCUGCAU | 23 | 0 | 0 | 0 | 0 | 0 | 0 | UUGGGAAUCUUGAUGAUGCUGC | 22 | 0 | 0 | 0 | 0 | 0 | 0 | AGAAUCUUGAUGAUGCUGCUU | 21 | 0 | 0 | 0 | 0 | 0 | 0 | GAAUCUUGAUGAUGCUGCAU | 20 | 0 | 0 | 0 | 0 | 0 | 0 | AGAAUCUUGAUGAUGCUGCAUAA | 23 | 0 | 0 | 0 | 0 | 0 | 0 | GGAAUCUUGAUGAUGCUGCCU | 21 | 0 | 0 | 0 | 0 | 0 | 0 | AGAAUCUUGAUGAUGCUACAU | 21 | 0 | 0 | 0 | 0 | 0 | 0 | AAAUCUUGAUGAUGCUGCAU | 20 | 0 | 0 | 0 | 0 | 0 | 0 | UGAAUCUUGAUGAUGCUGCAUU | 22 | 0 | 0 | 0 | 0 | 0 | 0 | GGAAUCUUGAUGAUGCUUCAU | 21 | 0 | 0 | 0 | 0 | 0 | 0 | AGAAUCUUGAUGAUGUUGCAU | 21 | 0 | 0 | 0 | 0 | 0 | 0 | GGGAAUCUUGAUGAUGCUGCU | 21 | 0 | 0 | 0 | 0 | 0 | 0 | GGAAUCUUGAUGAUGCAGCAG | 21 | 0 | 0 | 0 | 0 | 0 | 0 | GGAAUCUUGAUGAUGCUGCAGC | 22 | 0 | 0 | 0 | 0 | 0 | 0 | AGAACCUUGAUGAUGCUGCAG | 21 | 0 | 0 | 0 | 0 | 0 | 0 | CGAAUCUUGAUGAUGCUUCAU | 21 | 0 | 0 | 0 | 0 | 0 | 0 | AGAAUCUUGAUGAUGCGGCAG | 21 | 0 | 0 | 0 | 0 | 0 | 0 | AGAAUCUUCUUGAUGCUGCAU | 21 | 0 | 0 | 0 | 0 | 0 | 0 | ACAAUCUUGAUGAUGCUGCAU | 21 | 0 | 0 | 0 | 0 | 0 | 0 | AGAAUCUUGAUGCUGCUGCA | 20 | 0 | 0 | 0 | 0 | 0 | 0 | AGAAUCUUGACGAUGCUGCAG | 21 | 0 | 0 | 0 | 0 | 0 | 0 | GGAAUCUUGGUGAUGCUGCAU | 21 | 0 | 0 | 0 | 0 | 0 | 0 | UGAAUCUUGGUGAUGCUGCAU | 21 | 0 | 0 | 0 | 0 | 0 | 0 | CGAGAAUCUUGAUGAUGCUGC | 21 | 0 | 0 | 0 | 0 | 0 | 0 | AGAAUCGUGAUGAUGCUGCAU | 21 | 0 | 0 | 0 | 0 | 0 | 0 | AGAAUCUUGAAGAUGCUGCAU | 21 | 0 | 0 | 0 | 0 | 0 | 0 | AGAAUCUUGAUGAAGCUGCAU | 21 | 0 | 0 | 0 | 0 | 0 | 0 | AAAAUCUUGAUGAUGCUGCAU | 21 | 0 | 0 | 0 | 0 | 0 | 0 | AGAAUCCUGAUGAUGCUGCAU | 21 | 0 | 0 | 0 | 0 | 0 | 0 | AUCUUGAUGAUGCUGCAGAGA | 21 | 0 | 0 | 0 | 0 | 0 | 0 | UGAAUCUUGAUUAUGCUGCAU | 21 | 0 | 0 | 0 | 0 | 0 | 0 | AGAAUCUUGAUGUUGCUGCCU | 21 | 0 | 0 | 0 | 0 | 0 | 0 | GGAAUCUUGGUGAUGCUGCAG | 21 | 0 | 0 | 0 | 0 | 0 | 0 | AGAAUUUUGAUGAUGCUGCAU | 21 | 0 | 0 | 0 | 0 | 0 | 0 | AGAAUCUUGAUGAGGCGGCAU | 21 | 0 | 0 | 0 | 0 | 0 | 0 | AGAAAUUUGAUGAUGCUGCAU | 21 | 0 | 0 | 0 | 0 | 0 | 0 | GAGAAUCUUGAUGAUUCUGCA | 21 | 0 | 0 | 0 | 0 | 0 | 0 | AGAAUCUUGAUGAUGCUGAA | 20 | 0 | 0 | 0 | 0 | 0 | 0 | AGAAUCUUGAUGAUGCUGCAUU | 22 | 0 | 0 | 0 | 0 | 0 | 0 | GAAUCUUGAUGAUGCUGCCU | 20 | 0 | 0 | 0 | 0 | 0 | 0 | GGAAUCUCGAUGAUGCUGCAU | 21 | 0 | 0 | 0 | 0 | 0 | 0 | GGAAUCUUGAUGAUACUGCAU | 21 | 0 | 0 | 0 | 0 | 0 | 0 | AGAAACUUGAUGAUGCUGCAG | 21 | 0 | 0 | 0 | 0 | 0 | 0 | AGAAUCUUAAUGAUGCUGCAU | 21 | 0 | 0 | 0 | 0 | 0 | 0 | GGAAUCUUGAUGUUGCUGCAU | 21 | 0 | 0 | 0 | 0 | 0 | 0 | AGAAUCUUGAUGAUGCUGCAUUUU | 24 | 0 | 0 | 0 | 0 | 0 | 0 | AGAAUGUUGAUGAUGCUGCAU | 21 | 0 | 0 | 0 | 0 | 0 | 0 | UGAGAAUCUUGAUGAUGCUGCAU | 23 | 0 | 0 | 0 | 0 | 0 | 0 | AGAAUCUUGAGGAUGCUGCAU | 21 | 0 | 0 | 0 | 0 | 0 | 0 | UGAAUCUUGAUGAUGCUUCAU | 21 | 0 | 0 | 0 | 0 | 0 | 0 | ACAAUCUUGAUGAUGCUGCAG | 21 | 0 | 0 | 0 | 0 | 0 | 0 | GGAAUCUUGAUGUUGCUGCAG | 21 | 0 | 0 | 0 | 0 | 0 | 0 | AUAAUCUUGAUGAUGCUGCAU | 21 | 0 | 0 | 0 | 0 | 0 | 0 | AGGGAAUCUUGAUGAUGCUGC | 21 | 0 | 0 | 0 | 0 | 0 | 0 | UGAAUCUUGAUGAUGCUGCUU | 21 | 0 | 0 | 0 | 0 | 0 | 0 | UGAAUCUUGAUGAUGCUGAAU | 21 | 0 | 0 | 0 | 0 | 0 | 0 | AUGGGAAUGAUGAUGAUGCUG | 21 | 0 | 0 | 0 | 0 | 0 | 0 | GGGAAUCUUGAUUAUGCUGCA | 21 | 0 | 0 | 0 | 0 | 0 | 0 | AGAGAAUCUUGAUGAUGCUGC | 21 | 0 | 0 | 0 | 0 | 0 | 0 | GGAAUCUUGAUGAUGCUUCAG | 21 | 0 | 0 | 0 | 0 | 0 | 0 | AAAAUCUUGAUGAUGCUGCAG | 21 | 0 | 0 | 0 | 0 | 0 | 0 | CUUGAUGAUGCUGCAGAGAAU | 21 | 0 | 0 | 0 | 0 | 0 | 0 | AGAAUCUUGAUGAUGAUGCCU | 21 | 0 | 0 | 0 | 0 | 0 | 0 | AGAAUCUUGAUGAUGCUGCGU | 21 | 0 | 0 | 0 | 0 | 0 | 0 | GGAAUCUCGAUGAUGCUGCAG | 21 | 0 | 0 | 0 | 0 | 0 | 0 | GGGAAUCUUGAUGAUGCUGCAG | 22 | 0 | 0 | 0 | 0 | 0 | 0 | AGAAUCUGGAUGAUGCUGCAU | 21 | 0 | 0 | 0 | 0 | 0 | 0 | GGAAUCUUGAUGAUGCUGCAGA | 22 | 0 | 0 | 0 | 0 | 0 | 0 | GGAAUCUUGAUGAUGCUGCUG | 21 | 0 | 0 | 0 | 0 | 0 | 0 | GGAAAUUUGAUGAUGCUGCAG | 21 | 0 | 0 | 0 | 0 | 0 | 0 | AGAAUCAUGAUGAUGCUGCAG | 21 | 0 | 0 | 0 | 0 | 0 | 0 | CAGAAUCUUGAUGAUGCUGCAU | 22 | 0 | 0 | 0 | 0 | 0 | 0 | UGAAUAUUGAUGAUGCUGCAU | 21 | 0 | 0 | 0 | 0 | 0 | 0 | AGAAUCUUGAUGAUGCUGCCG | 21 | 0 | 0 | 0 | 0 | 0 | 0 | GGAAUCUUGAUGAUGCUGCAUU | 22 | 0 | 0 | 0 | 0 | 0 | 0 | GGAAUCAUGAUGAUGCUGCAG | 21 | 0 | 0 | 0 | 0 | 0 | 0 | AGAAUCUUGAUGAUGCUCCAC | 21 | 0 | 0 | 0 | 0 | 0 | 0 | GGAAUCUUGAUCAUGCUGCAU | 21 | 0 | 0 | 0 | 0 | 0 | 0 | UUGGGAAUCUUGAUGAUGCUGCAU | 24 | 0 | 0 | 0 | 0 | 0 | 0 | GGAAUCUUGAUGAUGCUGCAGAA | 23 | 0 | 0 | 0 | 0 | 0 | 0 |
