# Supplementary material for: The tomato genome sequence provides insights into fleshy fruit evolution
Source: Springer Nature journal article supplement (doi:10.1038/nature11119), 2012-05-01
Supplement: 41586_2012_BFnature11119_MOESM69_ESM.zip [file 41586_2012_BFnature11119_MOESM69_ESM.zip › Supplementary_HTM_tables/Supplementary_HTM_Table_23_miR319_S03.htm]

|  |  |  |  |  |  |  |  |
| --- | --- | --- | --- | --- | --- | --- | --- |
| miRNA\_VARIANT\_SEQUENCE | Sz | L | L | L | L | L | L |
 UUGCUGCCGACUCAUUCAUCCA | 22 | 0 | 0 | 0 | 0 | 0 | 0 | UUGCUGCCGACUCAUUCAUCC | 21 | 0 | 0 | 0 | 0 | 0 | 0 | AGCUGCCGACUCAUUCAUCCA | 21 | 0 | 0 | 0 | 0 | 0 | 0 | UUUGCUGCCGACUCAUUCAUCCA | 23 | 0 | 0 | 0 | 0 | 0 | 0 | UUGCUGCCGACUCAUUCCUCCA | 22 | 0 | 0 | 0 | 0 | 0 | 0 | UUGCUGCCGACUCAUUCAUCCAU | 23 | 0 | 0 | 0 | 0 | 0 | 0 | AGCUGCCGACUCAUUCAUCC | 20 | 0 | 0 | 0 | 0 | 0 | 0 | UUGCUGCCGACUCAUUCAUCCU | 22 | 0 | 0 | 0 | 0 | 0 | 0 | UUGCUGCCGACUCCUUCAUCCA | 22 | 0 | 0 | 0 | 0 | 0 | 0 | AGCUGCCGACUCAUUCAUCCC | 21 | 0 | 0 | 0 | 0 | 0 | 0 | UUGCUGCCGACUCAUUCAUCCAAA | 24 | 0 | 0 | 0 | 0 | 0 | 0 | AGCUGCCGACUCAUUCAUCCAA | 22 | 0 | 0 | 0 | 0 | 0 | 0 | UUGCUGCCGACUCAUUCUUCCA | 22 | 0 | 0 | 0 | 0 | 0 | 0 | UUGCUGCCGACUCAUUCAUCCC | 22 | 0 | 0 | 0 | 0 | 0 | 0 | UUGCUGCCGACUCAUUCAUC | 20 | 0 | 0 | 0 | 0 | 0 | 0 |
