# Supplementary material for: The tomato genome sequence provides insights into fleshy fruit evolution
Source: Springer Nature journal article supplement (doi:10.1038/nature11119), 2012-05-01
Supplement: 41586_2012_BFnature11119_MOESM69_ESM.zip [file 41586_2012_BFnature11119_MOESM69_ESM.zip › Supplementary_HTM_tables/Supplementary_HTM_Table_24_miR390_S01.htm]

|  |  |  |  |  |  |  |  |
| --- | --- | --- | --- | --- | --- | --- | --- |
| miRNA\_VARIANT\_SEQUENCE | Sz | L | L | L | L | L | L |
 AAGCUCAGGAGGGAUAGCGCC | 21 | 0 | 0 | 0 | 0 | 0 | 0 | AAGCUCAGGAGGGAUAGCACC | 21 | 0 | 0 | 0 | 0 | 0 | 0 | AAGCUCAGGAGGGAUAGCACCU | 22 | 0 | 0 | 0 | 0 | 0 | 0 | AAGCUCAGGAGGGCUAGCGCC | 21 | 0 | 0 | 0 | 0 | 0 | 0 | AAGCUCAGGAGGGGUAGCGCC | 21 | 0 | 0 | 0 | 0 | 0 | 0 | AAGCUCAGGAGGGAUAGCAC | 20 | 0 | 0 | 0 | 0 | 0 | 0 | AAGCUCAGGAGGGUUAGCGCC | 21 | 0 | 0 | 0 | 0 | 0 | 0 | AAGCUCAGGAGGGAUAGCGC | 20 | 0 | 0 | 0 | 0 | 0 | 0 | AAGCUCAGGAGGGAUAGCGCCAA | 23 | 0 | 0 | 0 | 0 | 0 | 0 | AAGCUCAGGAGGGCUAGCACC | 21 | 0 | 0 | 0 | 0 | 0 | 0 | AAGCUCAGGAGGGGUAGCACC | 21 | 0 | 0 | 0 | 0 | 0 | 0 | AAAGCUCAGGAGGGAUAGCGCC | 22 | 0 | 0 | 0 | 0 | 0 | 0 | AGCUCAGGAGGGAUAGCGCC | 20 | 0 | 0 | 0 | 0 | 0 | 0 | AAAGCUCAGGAGGGAUAGCGC | 21 | 0 | 0 | 0 | 0 | 0 | 0 | AAGCUCAGGAGGGAUAGAGCC | 21 | 0 | 0 | 0 | 0 | 0 | 0 | AAGCUCAGGAGGGAUAGCGCCA | 22 | 0 | 0 | 0 | 0 | 0 | 0 | AAAAGCUCAGGAGGGAUAGCGCC | 23 | 0 | 0 | 0 | 0 | 0 | 0 | AAGCUCAGGAGGGAUAGCCCC | 21 | 0 | 0 | 0 | 0 | 0 | 0 | AAGCUCAGGAGGGUUAGCACC | 21 | 0 | 0 | 0 | 0 | 0 | 0 | AAGCUCAGGAGGGAUAUCGCC | 21 | 0 | 0 | 0 | 0 | 0 | 0 | AAGCUCAGGAGGGGUAUCGCC | 21 | 0 | 0 | 0 | 0 | 0 | 0 | AAGCUCAGGAGGCAUAGCGCC | 21 | 0 | 0 | 0 | 0 | 0 | 0 | UAGCUCAGGAGGGAUAGCACC | 21 | 0 | 0 | 0 | 0 | 0 | 0 | AAGCUCCGGAGGGAUAGCACC | 21 | 0 | 0 | 0 | 0 | 0 | 0 | AAAAGCUCAGGUAGGAUAGCA | 21 | 0 | 0 | 0 | 0 | 0 | 0 | AAGCUCAGGAGGGAUAGCGAC | 21 | 0 | 0 | 0 | 0 | 0 | 0 | AAGCUCAGGAGGGAUAGUACC | 21 | 0 | 0 | 0 | 0 | 0 | 0 | AAGUUCAGGAGGGAUAGCGCC | 21 | 0 | 0 | 0 | 0 | 0 | 0 | AAGCUCAGGAGGGAUCGCGCC | 21 | 0 | 0 | 0 | 0 | 0 | 0 | AAGCUCAGGAGGAAUAGCGCC | 21 | 0 | 0 | 0 | 0 | 0 | 0 | AAGCUCAGGAGCGAUAGCGCC | 21 | 0 | 0 | 0 | 0 | 0 | 0 | AAGCUCAGGAGGGAUAGCACAU | 22 | 0 | 0 | 0 | 0 | 0 | 0 | AAAGCUCAGGUAGGAUAGCAC | 21 | 0 | 0 | 0 | 0 | 0 | 0 | AAGCUCAGGAGGGCUAGCCCC | 21 | 0 | 0 | 0 | 0 | 0 | 0 | AAGCUCAGGAGGGAUAGAGGC | 21 | 0 | 0 | 0 | 0 | 0 | 0 | UAGCUCAGGAGGGAUAGCGCC | 21 | 0 | 0 | 0 | 0 | 0 | 0 | AAGCUCAGGAGGGAUAGCACU | 21 | 0 | 0 | 0 | 0 | 0 | 0 | AAGCUCAGGAGGGAUAGAGUC | 21 | 0 | 0 | 0 | 0 | 0 | 0 | AAGCUCAGGAGGGAUAGCUCC | 21 | 0 | 0 | 0 | 0 | 0 | 0 | AAGCUCAGGAGGGAUAGCGCCAAA | 24 | 0 | 0 | 0 | 0 | 0 | 0 | AAGCUCAGGAGAGAUAGCGCC | 21 | 0 | 0 | 0 | 0 | 0 | 0 | AAGCUCAGGAGGGAUAGUGCC | 21 | 0 | 0 | 0 | 0 | 0 | 0 | AAGCUCAGGAGGAAUAGCACC | 21 | 0 | 0 | 0 | 0 | 0 | 0 | CAAGCUCAGGAGGGAUAGCGCC | 22 | 0 | 0 | 0 | 0 | 0 | 0 | CAAGCUCAGGAGGGAUAGCACC | 22 | 0 | 0 | 0 | 0 | 0 | 0 | AAGCUCAGGAGGGGUAGCGGC | 21 | 0 | 0 | 0 | 0 | 0 | 0 | AAGCCAGGAGGGAUAGCGCC | 20 | 0 | 0 | 0 | 0 | 0 | 0 | AAGCUCAUGAGGGAUAGCGCC | 21 | 0 | 0 | 0 | 0 | 0 | 0 | AAGCUUAGGAGGGAUAGCACC | 21 | 0 | 0 | 0 | 0 | 0 | 0 | AAGCUCAGGAGGGCCAGCGCC | 21 | 0 | 0 | 0 | 0 | 0 | 0 | UAAAGCUCAGGAGGGAUAGCG | 21 | 0 | 0 | 0 | 0 | 0 | 0 | AAGCUCAGGAGGGAUAGCAAC | 21 | 0 | 0 | 0 | 0 | 0 | 0 | AAGCUCAGGAGGGAUAGCGCG | 21 | 0 | 0 | 0 | 0 | 0 | 0 | AAGCUCAGGAGGGAUAGGGCG | 21 | 0 | 0 | 0 | 0 | 0 | 0 | AAGCUCAGGAGGGAUAGCACCAA | 23 | 0 | 0 | 0 | 0 | 0 | 0 | AAGCGCAGGAGGGAUAGCGCC | 21 | 0 | 0 | 0 | 0 | 0 | 0 | AAGCUCAGGAGGGCUCGCGCC | 21 | 0 | 0 | 0 | 0 | 0 | 0 | AAGCUCAGGAGGGGGAGCGCC | 21 | 0 | 0 | 0 | 0 | 0 | 0 | ACGCUCAGGAGGGAUAGCGCC | 21 | 0 | 0 | 0 | 0 | 0 | 0 | AAGCACAGGAGGGAUAGCGCC | 21 | 0 | 0 | 0 | 0 | 0 | 0 | AAGCUCAGGCGGGCUAGCGCC | 21 | 0 | 0 | 0 | 0 | 0 | 0 | GAGCUCAGGAGGGAUAGCGCC | 21 | 0 | 0 | 0 | 0 | 0 | 0 | AAGCUCAGGAGGGAUAGCCC | 20 | 0 | 0 | 0 | 0 | 0 | 0 | AAGCUCAGGAGGGAUCGCACC | 21 | 0 | 0 | 0 | 0 | 0 | 0 | AAGCUCAGGAGGGAUAGAACC | 21 | 0 | 0 | 0 | 0 | 0 | 0 | AAGCUCAGGAGGGAUAGCGUC | 21 | 0 | 0 | 0 | 0 | 0 | 0 | AACUCAGGAUGGAUAGCGCUA | 21 | 0 | 0 | 0 | 0 | 0 | 0 | AGCUCAGGAGGGAUAGCGCCA | 21 | 0 | 0 | 0 | 0 | 0 | 0 | AAUCUCAGGAGGGAUAGCACC | 21 | 0 | 0 | 0 | 0 | 0 | 0 | AAGCUUAGGAGGGAUAGCGCC | 21 | 0 | 0 | 0 | 0 | 0 | 0 | AAGCUCAGGAGGGAUAGCACA | 21 | 0 | 0 | 0 | 0 | 0 | 0 | AAGCUCAGAAGGGAUAGCGCC | 21 | 0 | 0 | 0 | 0 | 0 | 0 | AAGCUCAGGAGGGAGAGCGCC | 21 | 0 | 0 | 0 | 0 | 0 | 0 | AAGCUCACGAGGGAUAGCACC | 21 | 0 | 0 | 0 | 0 | 0 | 0 | AGAAGCUCAGAAGGGAUAGGAA | 22 | 0 | 0 | 0 | 0 | 0 | 0 | AAACUCAGGAUGGAUAGCGCUU | 22 | 0 | 0 | 0 | 0 | 0 | 0 | AAGCUCAGGAGGGAUAGAACA | 21 | 0 | 0 | 0 | 0 | 0 | 0 | AAGCUCAGUAGGGAUAGCGCC | 21 | 0 | 0 | 0 | 0 | 0 | 0 | AAGCACAGGAGGGAUAGCACC | 21 | 0 | 0 | 0 | 0 | 0 | 0 | AAGCUCAGGAGGGCUAGCGC | 20 | 0 | 0 | 0 | 0 | 0 | 0 | AAGCUCAGGAGGGCUAGAGCC | 21 | 0 | 0 | 0 | 0 | 0 | 0 | AAGAUCAGGAGGGAUAGCGCC | 21 | 0 | 0 | 0 | 0 | 0 | 0 | AAGCUCAGGAGGGAUAGCAA | 20 | 0 | 0 | 0 | 0 | 0 | 0 | AAGCUCAGGAGGUAUAGCACC | 21 | 0 | 0 | 0 | 0 | 0 | 0 | AAGCUCAGGAGGGAUAGCACUU | 22 | 0 | 0 | 0 | 0 | 0 | 0 | AAGCUCAGCAGGGAUAGCGCC | 21 | 0 | 0 | 0 | 0 | 0 | 0 | AAGCUCAGGAGGGAUAGCGCCU | 22 | 0 | 0 | 0 | 0 | 0 | 0 | AAGCUCAGGAGGGCUUGCGCC | 21 | 0 | 0 | 0 | 0 | 0 | 0 | AAGCUCAGGAGGGACAGCGAC | 21 | 0 | 0 | 0 | 0 | 0 | 0 | AACCUCAGGAGGGAUAGCGCC | 21 | 0 | 0 | 0 | 0 | 0 | 0 | AAGCUCAGGAGGGAUAGCACCC | 22 | 0 | 0 | 0 | 0 | 0 | 0 | AAGAUCAGGAGGGAUAGCACC | 21 | 0 | 0 | 0 | 0 | 0 | 0 | AGAAGCUCAGAAGGGAUAGGA | 21 | 0 | 0 | 0 | 0 | 0 | 0 | AAGCUCAGGAGGGAAAGCGCC | 21 | 0 | 0 | 0 | 0 | 0 | 0 | AAGCUCAGGAGGGCUACCGCC | 21 | 0 | 0 | 0 | 0 | 0 | 0 | AAGCUCAGGAUGGAUAGCACC | 21 | 0 | 0 | 0 | 0 | 0 | 0 | AGCUCAGGAGGGAUAGCACC | 20 | 0 | 0 | 0 | 0 | 0 | 0 | AAGCUCAGGAGGGAUAGCGCU | 21 | 0 | 0 | 0 | 0 | 0 | 0 | AAGCUCAGGAGGGCUAGCGCA | 21 | 0 | 0 | 0 | 0 | 0 | 0 | AAGCUCAGGAGGGUUAGCGC | 20 | 0 | 0 | 0 | 0 | 0 | 0 | AAGCUCAGGAGGGAUGGCACC | 21 | 0 | 0 | 0 | 0 | 0 | 0 |
