# Supplementary material for: The tomato genome sequence provides insights into fleshy fruit evolution
Source: Springer Nature journal article supplement (doi:10.1038/nature11119), 2012-05-01
Supplement: 41586_2012_BFnature11119_MOESM69_ESM.zip [file 41586_2012_BFnature11119_MOESM69_ESM.zip › Supplementary_HTM_tables/Supplementary_HTM_Table_25_miR390_S02.htm]

|  |  |  |  |  |  |  |  |
| --- | --- | --- | --- | --- | --- | --- | --- |
| miRNA\_VARIANT\_SEQUENCE | Sz | L | L | L | L | L | L |
 CGCUAUCCAUCCUGAGUUUUA | 21 | 0 | 0 | 0 | 0 | 0 | 0 | CGCUAUCCAUCCUGAGUUUCA | 21 | 0 | 0 | 0 | 0 | 0 | 0 | CGCUAUCCAUCUUGAGUUUUA | 21 | 0 | 0 | 0 | 0 | 0 | 0 | AACGCUAUCCAUCCUGAGUUUUA | 23 | 0 | 0 | 0 | 0 | 0 | 0 | CGCUAUCCAUCCUGAGUUUUAA | 22 | 0 | 0 | 0 | 0 | 0 | 0 | CGCUAUCCAUCUUGAGUUUU | 20 | 0 | 0 | 0 | 0 | 0 | 0 | CGCUAUCCAUCCUGAGUUUC | 20 | 0 | 0 | 0 | 0 | 0 | 0 | CGCUAUCCAUCUUGAGUUUUG | 21 | 0 | 0 | 0 | 0 | 0 | 0 | CGCUAUCCAUCUUGAGUUUUU | 21 | 0 | 0 | 0 | 0 | 0 | 0 | CGCUAUCCAUCCUGAGUUUUG | 21 | 0 | 0 | 0 | 0 | 0 | 0 | CGCUAUCCAUCCUGAGUUCU | 20 | 0 | 0 | 0 | 0 | 0 | 0 | CGCUAUCCAUCCUGAGUUUU | 20 | 0 | 0 | 0 | 0 | 0 | 0 | CGCUAUCCAUCCUGAGUUUUU | 21 | 0 | 0 | 0 | 0 | 0 | 0 |
