# Supplementary material for: The tomato genome sequence provides insights into fleshy fruit evolution
Source: Springer Nature journal article supplement (doi:10.1038/nature11119), 2012-05-01
Supplement: 41586_2012_BFnature11119_MOESM69_ESM.zip [file 41586_2012_BFnature11119_MOESM69_ESM.zip › Supplementary_HTM_tables/Supplementary_HTM_Table_28_miR394_S01.htm]

|  |  |  |  |  |  |  |  |
| --- | --- | --- | --- | --- | --- | --- | --- |
| miRNA\_VARIANT\_SEQUENCE | Sz | L | L | L | L | L | L |
 UUGGCAUUCUGUCCACCUCC | 20 | 0 | 0 | 0 | 0 | 0 | 0 | AGGUGGGCAUACUGUCAACA | 20 | 0 | 0 | 0 | 0 | 0 | 0 | AGGUGGGCAUACUGUCAACAG | 21 | 0 | 0 | 0 | 0 | 0 | 0 | UUUGGCAUUCUGUCCACCUCC | 21 | 0 | 0 | 0 | 0 | 0 | 0 | UUGGCAUUCUGUCUACCUCC | 20 | 0 | 0 | 0 | 0 | 0 | 0 | UUGGCAUUCUGUCAACCUCC | 20 | 0 | 0 | 0 | 0 | 0 | 0 | AGGGGGGCAUACUGUCAACA | 20 | 0 | 0 | 0 | 0 | 0 | 0 | UUGGCAUUCUGUCCACUCCC | 20 | 0 | 0 | 0 | 0 | 0 | 0 | UUGGCAUUCUGUCCACCUCCAA | 22 | 0 | 0 | 0 | 0 | 0 | 0 | UCGGCAUUCUGUCCACCUCC | 20 | 0 | 0 | 0 | 0 | 0 | 0 | UUGGCAUUCUGUACACCUCC | 20 | 0 | 0 | 0 | 0 | 0 | 0 | UUGGCAUUCUGUUCACCUCC | 20 | 0 | 0 | 0 | 0 | 0 | 0 | UUGGCAUUCUGUCCACCUUC | 20 | 0 | 0 | 0 | 0 | 0 | 0 | UUGGCAUUCUGUCCACCUCU | 20 | 0 | 0 | 0 | 0 | 0 | 0 | UUGGCAUUCUGUCCAACUCC | 20 | 0 | 0 | 0 | 0 | 0 | 0 | UUGGCAUUCUGUCCCCCUCC | 20 | 0 | 0 | 0 | 0 | 0 | 0 | UUGGCAUUCUGUCCUCCUCC | 20 | 0 | 0 | 0 | 0 | 0 | 0 | UUGGCAUUCUGUCCACCUCA | 20 | 0 | 0 | 0 | 0 | 0 | 0 | UUGGAAUUCUGUCCACCUCC | 20 | 0 | 0 | 0 | 0 | 0 | 0 | UUGGCAUUCUCUCCACCUCC | 20 | 0 | 0 | 0 | 0 | 0 | 0 | UUGGCAUUUUGUCCACCUCC | 20 | 0 | 0 | 0 | 0 | 0 | 0 | UUGGCAUUCUGUCCACUUCC | 20 | 0 | 0 | 0 | 0 | 0 | 0 | UUGGCAUUCUGUCCAUCUCC | 20 | 0 | 0 | 0 | 0 | 0 | 0 | AGGUGGGCAUACUGUCAACAGA | 22 | 0 | 0 | 0 | 0 | 0 | 0 | UUGGCAUUCUGUCCGCCUCC | 20 | 0 | 0 | 0 | 0 | 0 | 0 | UUGGCAUUCUGUCCACCUCCA | 21 | 0 | 0 | 0 | 0 | 0 | 0 | AGGUGGGCAUACUGUCAACU | 20 | 0 | 0 | 0 | 0 | 0 | 0 | UUGGCAUUCUUUCCACCUCC | 20 | 0 | 0 | 0 | 0 | 0 | 0 | UUGGCAUUCUGUCUCCCUCC | 20 | 0 | 0 | 0 | 0 | 0 | 0 | UUGGCAUUAUGUCCACCUCC | 20 | 0 | 0 | 0 | 0 | 0 | 0 | UUGGCAUUCUGUCCACCUCCU | 21 | 0 | 0 | 0 | 0 | 0 | 0 | UUGGCAUUCUGUCCACCUAC | 20 | 0 | 0 | 0 | 0 | 0 | 0 |
