# Supplementary material for: The tomato genome sequence provides insights into fleshy fruit evolution
Source: Springer Nature journal article supplement (doi:10.1038/nature11119), 2012-05-01
Supplement: 41586_2012_BFnature11119_MOESM69_ESM.zip [file 41586_2012_BFnature11119_MOESM69_ESM.zip › Supplementary_HTM_tables/Supplementary_HTM_Table_30_miR396_S01.htm]

|  |  |  |  |  |  |  |  |
| --- | --- | --- | --- | --- | --- | --- | --- |
| miRNA\_VARIANT\_SEQUENCE | Sz | L | L | L | L | L | L |
 UUCCACAGCUUUCUUGAACUG | 21 | 0 | 0 | 0 | 0 | 0 | 0 | UUCCACAGCUUUCUUGAACUU | 21 | 0 | 0 | 0 | 0 | 0 | 0 | UUCCACAGCUUUCUUGAACUUC | 22 | 0 | 0 | 0 | 0 | 0 | 0 | UUCCACAGCUUUCUUUAACUG | 21 | 0 | 0 | 0 | 0 | 0 | 0 | UUCCACAGCUUUCUUGAACUGCA | 23 | 0 | 0 | 0 | 0 | 0 | 0 | UUCCACAGCUUUCUUGAACU | 20 | 0 | 0 | 0 | 0 | 0 | 0 | ACAGCUUUCUUGAACUGCAUC | 21 | 0 | 0 | 0 | 0 | 0 | 0 | UUCCACAGCUUUCUUGCACUG | 21 | 0 | 0 | 0 | 0 | 0 | 0 | UUUCACAGCUUUCUUGAACUG | 21 | 0 | 0 | 0 | 0 | 0 | 0 | UUCCACAGCUUUCUUGAACUGC | 22 | 0 | 0 | 0 | 0 | 0 | 0 | UUCCACAGUUUUCUUGAACUG | 21 | 0 | 0 | 0 | 0 | 0 | 0 | UCCACAGCUUUCUUGAACUG | 20 | 0 | 0 | 0 | 0 | 0 | 0 | UCCACAGCUUUCUUGAACUGCA | 22 | 0 | 0 | 0 | 0 | 0 | 0 | UUCCACAGCUUUUUUGAACUG | 21 | 0 | 0 | 0 | 0 | 0 | 0 | ACAGCUUUCUUGAACUGCAUA | 21 | 0 | 0 | 0 | 0 | 0 | 0 | UUUUACAGCUUUCUUGAACUG | 21 | 0 | 0 | 0 | 0 | 0 | 0 | UUCCACAGCCUUCUUGAACUG | 21 | 0 | 0 | 0 | 0 | 0 | 0 | UUCCACAGCUUCCUUGAACUG | 21 | 0 | 0 | 0 | 0 | 0 | 0 | AUUCCACAGCUUUCUUGAACUG | 22 | 0 | 0 | 0 | 0 | 0 | 0 | UUUUACAGCUUUCUUGAACUU | 21 | 0 | 0 | 0 | 0 | 0 | 0 | UUCCACAGCUUUCUUGAACUUUAU | 24 | 0 | 0 | 0 | 0 | 0 | 0 | UCUUACAGCUUUCUUGAACUG | 21 | 0 | 0 | 0 | 0 | 0 | 0 | UUCCACAGCUUUCUUUAACUGC | 22 | 0 | 0 | 0 | 0 | 0 | 0 | UUCCACAGCUUUCUUCAACUU | 21 | 0 | 0 | 0 | 0 | 0 | 0 | UUCCACAGAUUUAUUGAACUG | 21 | 0 | 0 | 0 | 0 | 0 | 0 | UUCGACAGCUUUCUUGAACUG | 21 | 0 | 0 | 0 | 0 | 0 | 0 | UCCACAGCUUUCUUGAACUU | 20 | 0 | 0 | 0 | 0 | 0 | 0 | UUCCACAGCUUUCUUUCACUG | 21 | 0 | 0 | 0 | 0 | 0 | 0 | UUCCACAGCUUUCUCGAACUG | 21 | 0 | 0 | 0 | 0 | 0 | 0 | UUCCACAGCUUUCCUGAACUG | 21 | 0 | 0 | 0 | 0 | 0 | 0 | UUCCAAAGAUUUCUUGAAAUG | 21 | 0 | 0 | 0 | 0 | 0 | 0 | UACCACAGCUUUCUUGAACUU | 21 | 0 | 0 | 0 | 0 | 0 | 0 | UUCCACGGCUUUCUUGAACUG | 21 | 0 | 0 | 0 | 0 | 0 | 0 | UUCCACAGCGUUCUUGAACUU | 21 | 0 | 0 | 0 | 0 | 0 | 0 | CACAGCUUUCUUGAACUGCA | 20 | 0 | 0 | 0 | 0 | 0 | 0 | UUCCACAGCUUUCUUGAACUGAA | 23 | 0 | 0 | 0 | 0 | 0 | 0 | UUCCACAGCUUUCUUGAACA | 20 | 0 | 0 | 0 | 0 | 0 | 0 | UUCCACAGCUUUCUUGAAAA | 20 | 0 | 0 | 0 | 0 | 0 | 0 | UUCCACAGCUUUCUUGAACUUU | 22 | 0 | 0 | 0 | 0 | 0 | 0 | UUCCACAGCUUUCUUGCCCUG | 21 | 0 | 0 | 0 | 0 | 0 | 0 | AUCCACAGCUUUCUUGAACUU | 21 | 0 | 0 | 0 | 0 | 0 | 0 | UUCCACAGCUUUCUUGAACUUAA | 23 | 0 | 0 | 0 | 0 | 0 | 0 | UUCCCCAGCUUUCUUGAACUG | 21 | 0 | 0 | 0 | 0 | 0 | 0 | UCCACAGGCUUUCUUGAACUG | 21 | 0 | 0 | 0 | 0 | 0 | 0 | UUCAACAGCUUUCUUGAACUU | 21 | 0 | 0 | 0 | 0 | 0 | 0 | UUCCACAGCCUUCUUGAACUU | 21 | 0 | 0 | 0 | 0 | 0 | 0 | UUCCACAGCUUUCGUGAACUG | 21 | 0 | 0 | 0 | 0 | 0 | 0 | UCCACAGCUUUCUUGAACUUC | 21 | 0 | 0 | 0 | 0 | 0 | 0 | UUCCACAGCUUUCUUGAACUUCU | 23 | 0 | 0 | 0 | 0 | 0 | 0 | UUCCACAGCUUUCUUGAACUUUU | 23 | 0 | 0 | 0 | 0 | 0 | 0 | UUCCCCAGCUUUCUUGAACUU | 21 | 0 | 0 | 0 | 0 | 0 | 0 | UUCCACAGCGUUCUUGAACUG | 21 | 0 | 0 | 0 | 0 | 0 | 0 | UCUCACAGCUUUCUUGAACUG | 21 | 0 | 0 | 0 | 0 | 0 | 0 | UCCACAGCUUUCUUGAACUAU | 21 | 0 | 0 | 0 | 0 | 0 | 0 | CCACAGCUUUCUUGAACUGCA | 21 | 0 | 0 | 0 | 0 | 0 | 0 | AGAGCUUUCUUGAACUGAUCA | 21 | 0 | 0 | 0 | 0 | 0 | 0 | UUCCACAGCUUUCUUGAAUUUUU | 23 | 0 | 0 | 0 | 0 | 0 | 0 | UUCCACCGCUUUCUUGCACUG | 21 | 0 | 0 | 0 | 0 | 0 | 0 | UUCCACAGCUUUCUUGAAUUUU | 22 | 0 | 0 | 0 | 0 | 0 | 0 | UUACACAGCUUUCUUGAACUU | 21 | 0 | 0 | 0 | 0 | 0 | 0 | UUCCACAGCUUCUUUGAACUG | 21 | 0 | 0 | 0 | 0 | 0 | 0 | UUCCACAGCUUUCUUGAACGG | 21 | 0 | 0 | 0 | 0 | 0 | 0 | UUCCACAGCUCUUUUGAACUG | 21 | 0 | 0 | 0 | 0 | 0 | 0 | UUCCACAGCUUUCUUGAUCUG | 21 | 0 | 0 | 0 | 0 | 0 | 0 | UUCCACAGCUUUCUUGAAGUG | 21 | 0 | 0 | 0 | 0 | 0 | 0 | UUCCACAGCUUUCUUGAACCG | 21 | 0 | 0 | 0 | 0 | 0 | 0 | UUCCACAGCUUGCUUGAACUG | 21 | 0 | 0 | 0 | 0 | 0 | 0 | UUCCACCGCUUUCUUGAACUU | 21 | 0 | 0 | 0 | 0 | 0 | 0 | UUCCACAGCUUUCUUGAAUUU | 21 | 0 | 0 | 0 | 0 | 0 | 0 | UUCCACAGCUUUCUUGAACAA | 21 | 0 | 0 | 0 | 0 | 0 | 0 | UUCCACAGCUUUCUUAACUU | 20 | 0 | 0 | 0 | 0 | 0 | 0 | UUCCACAGAUUUCUUGAACUG | 21 | 0 | 0 | 0 | 0 | 0 | 0 | UUCCACAGCUUUCUUGAACUGAGG | 24 | 0 | 0 | 0 | 0 | 0 | 0 | CUUCACAGCUUUCUUGAACUU | 21 | 0 | 0 | 0 | 0 | 0 | 0 | UUCCACUGCUUUCUUGAACUG | 21 | 0 | 0 | 0 | 0 | 0 | 0 | CUUCACAGCUUUCUUGAACUG | 21 | 0 | 0 | 0 | 0 | 0 | 0 | UUCCACAGCUUUCUUGAACCU | 21 | 0 | 0 | 0 | 0 | 0 | 0 | UUCCACAGCUUUCUUGUACUU | 21 | 0 | 0 | 0 | 0 | 0 | 0 | UUCCACAGCUUUAUUGAACUG | 21 | 0 | 0 | 0 | 0 | 0 | 0 | UUCCACAGCUUUCUUGAAAUG | 21 | 0 | 0 | 0 | 0 | 0 | 0 | UUCCAAAGCUUUCUUGAACUG | 21 | 0 | 0 | 0 | 0 | 0 | 0 | CUUCCACAGCUUUCUUGAACUG | 22 | 0 | 0 | 0 | 0 | 0 | 0 | UUCCACAGCUUUGUUGAACUG | 21 | 0 | 0 | 0 | 0 | 0 | 0 | UUCCGCAGCUUUCUUGAACUG | 21 | 0 | 0 | 0 | 0 | 0 | 0 | UUCCAAAGCUUUCUUGAACUU | 21 | 0 | 0 | 0 | 0 | 0 | 0 | UUCCACAGCUUUCUAGAACUG | 21 | 0 | 0 | 0 | 0 | 0 | 0 | GUCCACAGCUUUCUUGAACUG | 21 | 0 | 0 | 0 | 0 | 0 | 0 | UUCCACCGCUUUCUUUAACUG | 21 | 0 | 0 | 0 | 0 | 0 | 0 | UUCCAUAGCUUUCUUGAACUG | 21 | 0 | 0 | 0 | 0 | 0 | 0 | UUCCACGGCUUUCUUGAACUU | 21 | 0 | 0 | 0 | 0 | 0 | 0 | UUCCACAGCUUUCUUGGACUU | 21 | 0 | 0 | 0 | 0 | 0 | 0 | UUCCACAGCUUUCUUGACCUG | 21 | 0 | 0 | 0 | 0 | 0 | 0 | UUCCACCGCUUUCUUGAACUG | 21 | 0 | 0 | 0 | 0 | 0 | 0 | UUCCACAGCUUUCUUGAACC | 20 | 0 | 0 | 0 | 0 | 0 | 0 | UUCCACAGCUUUCUUGAACGGCU | 23 | 0 | 0 | 0 | 0 | 0 | 0 | UUCCACAGCUUUCUUCAACUG | 21 | 0 | 0 | 0 | 0 | 0 | 0 | CUCCACAGCUUUCUUGAACUG | 21 | 0 | 0 | 0 | 0 | 0 | 0 | UUCCACAUCUUUCUUGAACUG | 21 | 0 | 0 | 0 | 0 | 0 | 0 | UUCCACAGCUUUCUUGAACUUUC | 23 | 0 | 0 | 0 | 0 | 0 | 0 | UUCCUCAGCUUUCUUGAACUG | 21 | 0 | 0 | 0 | 0 | 0 | 0 | UUCCACAGCUUUCUUGAUCUU | 21 | 0 | 0 | 0 | 0 | 0 | 0 |
