# Supplementary material for: The tomato genome sequence provides insights into fleshy fruit evolution
Source: Springer Nature journal article supplement (doi:10.1038/nature11119), 2012-05-01
Supplement: 41586_2012_BFnature11119_MOESM69_ESM.zip [file 41586_2012_BFnature11119_MOESM69_ESM.zip › Supplementary_HTM_tables/Supplementary_HTM_Table_31_miR396_S02.htm]

|  |  |  |  |  |  |  |  |
| --- | --- | --- | --- | --- | --- | --- | --- |
| miRNA\_VARIANT\_SEQUENCE | Sz | L | L | L | L | L | L |
 UCCAAGAAAGCUGUGGGAAA | 20 | 0 | 0 | 0 | 0 | 0 | 0 | GUUCAAUAAAGCUGUGGGAAG | 21 | 0 | 0 | 0 | 0 | 0 | 0 | UCAAUAAAGCUGUGGGAAGA | 20 | 0 | 0 | 0 | 0 | 0 | 0 | UUCAAUAAAGCUGUGGGAAG | 20 | 0 | 0 | 0 | 0 | 0 | 0 | GUUCAAUAAGGCUGUGGGAAG | 21 | 0 | 0 | 0 | 0 | 0 | 0 | CAAUAAAGCUGUGGGAAGAUA | 21 | 0 | 0 | 0 | 0 | 0 | 0 | UUCAAGAAAGUUGUGGGAAA | 20 | 0 | 0 | 0 | 0 | 0 | 0 | UUCAAUAAAGCUGUGGGAAGA | 21 | 0 | 0 | 0 | 0 | 0 | 0 | GUCCAAGAAAGCUGUGGGAAA | 21 | 0 | 0 | 0 | 0 | 0 | 0 | UUCAAUAAGGCUGUGGGAAGA | 21 | 0 | 0 | 0 | 0 | 0 | 0 | GUUCAAGAAAGUUGUGGGAAA | 21 | 0 | 0 | 0 | 0 | 0 | 0 | UUCAAUAAGGCUGUGGGAAG | 20 | 0 | 0 | 0 | 0 | 0 | 0 | GGUUCAAUAAGGCUGUGGGAAG | 22 | 0 | 0 | 0 | 0 | 0 | 0 | UCCAAGAAAGCUGUGGGAAAA | 21 | 0 | 0 | 0 | 0 | 0 | 0 | UCAAUAAGGCUGUGGGAAGA | 20 | 0 | 0 | 0 | 0 | 0 | 0 | UUCAAUAAAGCUGUGGUAAG | 20 | 0 | 0 | 0 | 0 | 0 | 0 | AAUAAAGCUGUGGGAAGAUA | 20 | 0 | 0 | 0 | 0 | 0 | 0 | GAAGAAUGCUGUGGAAGAAAAUGG | 24 | 0 | 0 | 0 | 0 | 0 | 0 | UCAAUAAAGCUGUGGGAAGU | 20 | 0 | 0 | 0 | 0 | 0 | 0 | GUUCAAUAAAGCUGUGGGAAGAA | 23 | 0 | 0 | 0 | 0 | 0 | 0 | UUCAAUAAAGCUGUGGGAAGC | 21 | 0 | 0 | 0 | 0 | 0 | 0 | UCCAAGAAAGCUGUGGGAAAAA | 22 | 0 | 0 | 0 | 0 | 0 | 0 | GGUCAAUAAAGCUGUGGGAAG | 21 | 0 | 0 | 0 | 0 | 0 | 0 | GUUCAAUAAAGCUGUGGGUAG | 21 | 0 | 0 | 0 | 0 | 0 | 0 | UCAAUAAGGCUGUGGGAAGC | 20 | 0 | 0 | 0 | 0 | 0 | 0 | GUCCAAGAAAGCUGUGGGAAU | 21 | 0 | 0 | 0 | 0 | 0 | 0 | GUUCAAUAAAGCUGUGGGAUG | 21 | 0 | 0 | 0 | 0 | 0 | 0 | CCAAGAAAGCUGUGGGAAAAA | 21 | 0 | 0 | 0 | 0 | 0 | 0 | GUUCAAUAAAGCUGUCGGAAG | 21 | 0 | 0 | 0 | 0 | 0 | 0 | GUUCAAUAAAGCUGUGGGAAA | 21 | 0 | 0 | 0 | 0 | 0 | 0 | UUCAAGAAAGUUGUGGGACG | 20 | 0 | 0 | 0 | 0 | 0 | 0 | UCCAAGAAAGCUGUGGGAAC | 20 | 0 | 0 | 0 | 0 | 0 | 0 | UUCAAUAAAGUUGUGGGAAG | 20 | 0 | 0 | 0 | 0 | 0 | 0 | GUUCAAUAAAGCUGUUGGAAG | 21 | 0 | 0 | 0 | 0 | 0 | 0 | UCAAUAAAGCUGUGGGAAGAU | 21 | 0 | 0 | 0 | 0 | 0 | 0 | GGUUCAAUAAGGCUGUGGGAA | 21 | 0 | 0 | 0 | 0 | 0 | 0 | AGCUGUGGGAAAAGAUGGCAA | 21 | 0 | 0 | 0 | 0 | 0 | 0 | GUUUAAUAAAGCUGUGGGAAG | 21 | 0 | 0 | 0 | 0 | 0 | 0 | GUUCAAUAAAGCUGCGGGAAG | 21 | 0 | 0 | 0 | 0 | 0 | 0 | GAUCAAUAAAGCUGUGGGAAG | 21 | 0 | 0 | 0 | 0 | 0 | 0 | UCAAUAAAGCUGUGGGAAGG | 20 | 0 | 0 | 0 | 0 | 0 | 0 | CUUCAAUAAAGCUGUGGGAAG | 21 | 0 | 0 | 0 | 0 | 0 | 0 | GUUCAAUAAAGCUGGGGGAAG | 21 | 0 | 0 | 0 | 0 | 0 | 0 | AGUCCAAGAAAGCUGUGGGAAA | 22 | 0 | 0 | 0 | 0 | 0 | 0 | AUAAAGCUGUGGGAGGAUAUA | 21 | 0 | 0 | 0 | 0 | 0 | 0 | UUCAAUAAAGCUGUGCGAAG | 20 | 0 | 0 | 0 | 0 | 0 | 0 | GUUCAAUAAAGAUGUGGGAAG | 21 | 0 | 0 | 0 | 0 | 0 | 0 | UUCAAUAAAGCUGCGGGAAGA | 21 | 0 | 0 | 0 | 0 | 0 | 0 | GUUCAAUAAAGCUGUGGUAAG | 21 | 0 | 0 | 0 | 0 | 0 | 0 | UCAAUAAAGCUGUGGGCAGA | 20 | 0 | 0 | 0 | 0 | 0 | 0 | UUCAAUAAAGCUGGGGGAAG | 20 | 0 | 0 | 0 | 0 | 0 | 0 | GUCCAAUAAAGCUGUGGGAAG | 21 | 0 | 0 | 0 | 0 | 0 | 0 | UUCAAUAAAGCUGUGGGAAGU | 21 | 0 | 0 | 0 | 0 | 0 | 0 | AAGAAAGCUGUGGGAAAAGAUGGC | 24 | 0 | 0 | 0 | 0 | 0 | 0 | GUUAAAUAAAGCUGUGGGAAG | 21 | 0 | 0 | 0 | 0 | 0 | 0 | UCCAAGAAAGCUGUGGGAAUU | 21 | 0 | 0 | 0 | 0 | 0 | 0 | GUUCAAUAAAGCUGUGGGGAG | 21 | 0 | 0 | 0 | 0 | 0 | 0 | UCCAAGAAAGCUGUGGGAAG | 20 | 0 | 0 | 0 | 0 | 0 | 0 | UCCAAGAAAGCUGUGGGAAAU | 21 | 0 | 0 | 0 | 0 | 0 | 0 | AAGAAUGCUGUGGAAGAAAA | 20 | 0 | 0 | 0 | 0 | 0 | 0 | AAGCUGUGGGAAAAGAUGGCA | 21 | 0 | 0 | 0 | 0 | 0 | 0 | AGAAAGCUGUGGGAAAAGAUGG | 22 | 0 | 0 | 0 | 0 | 0 | 0 | GUUCAAUAAGGCUGUGGGAA | 20 | 0 | 0 | 0 | 0 | 0 | 0 | GUUCAAUAAAGCUGUGGGAAC | 21 | 0 | 0 | 0 | 0 | 0 | 0 | UUCAAGAAAGUUGUGGGAAAA | 21 | 0 | 0 | 0 | 0 | 0 | 0 | GUUCAAUAAAGCUGUGUGAAG | 21 | 0 | 0 | 0 | 0 | 0 | 0 | GUCCAAGAAAGCUGUGGGAA | 20 | 0 | 0 | 0 | 0 | 0 | 0 | GUUCAAUAAAGCUGUGGGCAG | 21 | 0 | 0 | 0 | 0 | 0 | 0 | AAGCUGUGGGAAAAGAUGGCAA | 22 | 0 | 0 | 0 | 0 | 0 | 0 | GUUCAAUAAAGCUGUGGGACG | 21 | 0 | 0 | 0 | 0 | 0 | 0 | GUUCAAUAAAUCUGUGGGAAG | 21 | 0 | 0 | 0 | 0 | 0 | 0 | UUCAAGAAAGUUGUGGGAAU | 20 | 0 | 0 | 0 | 0 | 0 | 0 | UUUAAUAAAGCUGUGGGAAG | 20 | 0 | 0 | 0 | 0 | 0 | 0 | UUCAAUAAAGCUGUUGGAAG | 20 | 0 | 0 | 0 | 0 | 0 | 0 | GUUCAAUAAAGCUAUGGGAAG | 21 | 0 | 0 | 0 | 0 | 0 | 0 | CCAAGAAAGCUGUGGGAAAAG | 21 | 0 | 0 | 0 | 0 | 0 | 0 | GUUCAAUAAAGCUGUGGGAAGA | 22 | 0 | 0 | 0 | 0 | 0 | 0 | UUCAAUAAAGCUGUGGGAAGAC | 22 | 0 | 0 | 0 | 0 | 0 | 0 | AGUCCAAGAAAGCUGUGGGAA | 21 | 0 | 0 | 0 | 0 | 0 | 0 | UCCAAGAAAGCUGUGGGAAAG | 21 | 0 | 0 | 0 | 0 | 0 | 0 | AGUUCAAGAAAGUUGUGGGAAA | 22 | 0 | 0 | 0 | 0 | 0 | 0 | UCCAAGAAAGCUGUGGGAAAC | 21 | 0 | 0 | 0 | 0 | 0 | 0 | AAAGCUGUGGGAAAAGAUGGCA | 22 | 0 | 0 | 0 | 0 | 0 | 0 | UUCAAUAAAGCUGUGUGAAG | 20 | 0 | 0 | 0 | 0 | 0 | 0 | UCAAUAAAGCUGUGGGACGA | 20 | 0 | 0 | 0 | 0 | 0 | 0 | UUCAAGAAAGCUGUGGAAAAA | 21 | 0 | 0 | 0 | 0 | 0 | 0 | AAGCUGUGGGAAAAGAUGGC | 20 | 0 | 0 | 0 | 0 | 0 | 0 | UCAAUAAAGCUGUGGGAAGC | 20 | 0 | 0 | 0 | 0 | 0 | 0 | AAUCCAAGAAAGCUGUGGGAAA | 22 | 0 | 0 | 0 | 0 | 0 | 0 | GUUCAAUAAAGCUGUGGGAA | 20 | 0 | 0 | 0 | 0 | 0 | 0 | GCUCAAUAAAGCUGUGGGAAG | 21 | 0 | 0 | 0 | 0 | 0 | 0 | GUUCAAUAAAGCUGUGGAAAG | 21 | 0 | 0 | 0 | 0 | 0 | 0 | GUUCAAUAAAGCUGAGGGAAG | 21 | 0 | 0 | 0 | 0 | 0 | 0 | UCCAAGAAAGCUGUGGGAAU | 20 | 0 | 0 | 0 | 0 | 0 | 0 | GUUCAAUAAAGCUGUGGGAGG | 21 | 0 | 0 | 0 | 0 | 0 | 0 | GUUCAAUAAAGCUGUGGGAAU | 21 | 0 | 0 | 0 | 0 | 0 | 0 | GUCCAAGAAAGCUGUGGGAAC | 21 | 0 | 0 | 0 | 0 | 0 | 0 | GGUUCAAUAAAGCUGUGGGAAG | 22 | 0 | 0 | 0 | 0 | 0 | 0 | CCAAGAAAGCUGUGGGAAAU | 20 | 0 | 0 | 0 | 0 | 0 | 0 | GUUCAAUAAAGCUGUGGGAAGC | 22 | 0 | 0 | 0 | 0 | 0 | 0 |
