# Supplementary material for: The tomato genome sequence provides insights into fleshy fruit evolution
Source: Springer Nature journal article supplement (doi:10.1038/nature11119), 2012-05-01
Supplement: 41586_2012_BFnature11119_MOESM69_ESM.zip [file 41586_2012_BFnature11119_MOESM69_ESM.zip › Supplementary_HTM_tables/Supplementary_HTM_Table_32_miR397_S01.htm]

|  |  |  |  |  |  |  |  |
| --- | --- | --- | --- | --- | --- | --- | --- |
| miRNA\_VARIANT\_SEQUENCE | Sz | L | L | L | L | L | L |
 UCAUUGAGUGCAGCGUUGAUG | 21 | 0 | 0 | 0 | 0 | 0 | 0 | AUUGAGUGCAGCGUUGAUGAC | 21 | 0 | 0 | 0 | 0 | 0 | 0 | UGAUUGAGUGCAGCGUUGAUG | 21 | 0 | 0 | 0 | 0 | 0 | 0 | AUUGAGUGCAGCGUUGAUGACA | 22 | 0 | 0 | 0 | 0 | 0 | 0 | UUGAGUGCAGCGUUGAUGACA | 21 | 0 | 0 | 0 | 0 | 0 | 0 | AUUGAGUGCAGCGUUGAUGA | 20 | 0 | 0 | 0 | 0 | 0 | 0 | AUUGAGUGCAGCGUUGCUGAC | 21 | 0 | 0 | 0 | 0 | 0 | 0 | UCAUUGAGUGCAGCGUUGCUG | 21 | 0 | 0 | 0 | 0 | 0 | 0 | AUUGAGUGCAGCGUUGAUUAC | 21 | 0 | 0 | 0 | 0 | 0 | 0 | UCAUUGAGUGUAGCGUUGAUG | 21 | 0 | 0 | 0 | 0 | 0 | 0 | AUUGAGUGUAGCGUUGAUGAA | 21 | 0 | 0 | 0 | 0 | 0 | 0 | UGAGUGCAGCGUUGAUGACAU | 21 | 0 | 0 | 0 | 0 | 0 | 0 | UCACUGAGUGCAGCGUUGAUG | 21 | 0 | 0 | 0 | 0 | 0 | 0 | UCUUGAGUGCAGCGUUGAUG | 20 | 0 | 0 | 0 | 0 | 0 | 0 | UCAUUGAGUGCAGCGUUGAUGA | 22 | 0 | 0 | 0 | 0 | 0 | 0 | UCAUUGAGUGCAGCGUUGCUU | 21 | 0 | 0 | 0 | 0 | 0 | 0 | UGAUCGAGUUUAGCGUUGAUG | 21 | 0 | 0 | 0 | 0 | 0 | 0 | AUUGAGUGCAGCGUUGAUGACAU | 23 | 0 | 0 | 0 | 0 | 0 | 0 | UGAUUGAGUGUAGCGUUGAUG | 21 | 0 | 0 | 0 | 0 | 0 | 0 | UCAUUGAGUGCAGCGUUGGUG | 21 | 0 | 0 | 0 | 0 | 0 | 0 | UCAUUGAGGGCAGCGUUGAUG | 21 | 0 | 0 | 0 | 0 | 0 | 0 | UCAUUGAGUGCAGCGUUGAUU | 21 | 0 | 0 | 0 | 0 | 0 | 0 | AUUGAGUGCAGCGUUGAUGCC | 21 | 0 | 0 | 0 | 0 | 0 | 0 | UCAUUGAGUGCAGCGUUGAU | 20 | 0 | 0 | 0 | 0 | 0 | 0 | AUUGAGUGCAGCGUUGAUGAA | 21 | 0 | 0 | 0 | 0 | 0 | 0 | UCAUUGAGUGCAUCGUUGAUG | 21 | 0 | 0 | 0 | 0 | 0 | 0 | CAUUGAGUGCAGCGUUGAUGA | 21 | 0 | 0 | 0 | 0 | 0 | 0 | AUUGAGUGUAGCGUUGAUGAC | 21 | 0 | 0 | 0 | 0 | 0 | 0 |
