# Supplementary material for: The tomato genome sequence provides insights into fleshy fruit evolution
Source: Springer Nature journal article supplement (doi:10.1038/nature11119), 2012-05-01
Supplement: 41586_2012_BFnature11119_MOESM69_ESM.zip [file 41586_2012_BFnature11119_MOESM69_ESM.zip › Supplementary_HTM_tables/Supplementary_HTM_Table_33_miR398_S01.htm]

|  |  |  |  |  |  |  |  |
| --- | --- | --- | --- | --- | --- | --- | --- |
| miRNA\_VARIANT\_SEQUENCE | Sz | L | L | L | L | L | L |
 UAUGUUCUCAGGUCGCCCCUG | 21 | 0 | 0 | 0 | 0 | 0 | 0 | UGUGUUCUCAGGUCGCCCCUG | 21 | 0 | 0 | 0 | 0 | 0 | 0 | CAUGUGUUCUCAGGUCGCCCC | 21 | 0 | 0 | 0 | 0 | 0 | 0 | UAUGUGUUCUCAGGUCGCCCC | 21 | 0 | 0 | 0 | 0 | 0 | 0 | UUGUGUUCUCAGGUCACCCCU | 21 | 0 | 0 | 0 | 0 | 0 | 0 | AUAUGUUCUCAGGUCGCCCCUG | 22 | 0 | 0 | 0 | 0 | 0 | 0 | UGUGUUCUCAGGUCACCCCUU | 21 | 0 | 0 | 0 | 0 | 0 | 0 | AUGUGUUCUCAGGUCGCCCCUG | 22 | 0 | 0 | 0 | 0 | 0 | 0 | UGUGUGUUCUCAGGUCGCCCC | 21 | 0 | 0 | 0 | 0 | 0 | 0 | UGUGUUCUCAGGUCGCACCUG | 21 | 0 | 0 | 0 | 0 | 0 | 0 | CUUGUGUUCUCAGGUCACCCCU | 22 | 0 | 0 | 0 | 0 | 0 | 0 | GUUCUCAGGUUACCCCUGUUG | 21 | 0 | 0 | 0 | 0 | 0 | 0 | UGUGUUCCCAGGUCACCCCUU | 21 | 0 | 0 | 0 | 0 | 0 | 0 | UGUGUUCUCAGGUCGCCCCC | 20 | 0 | 0 | 0 | 0 | 0 | 0 | AUGUUCUCAGGUCGCCCCUG | 20 | 0 | 0 | 0 | 0 | 0 | 0 | AAUAUGUUCUCAGGUCGCCCCUG | 23 | 0 | 0 | 0 | 0 | 0 | 0 | UAUGUUCUCAGGUCGCCCCUGAA | 23 | 0 | 0 | 0 | 0 | 0 | 0 | UAUGUUCUCAGGUCGCCCCU | 20 | 0 | 0 | 0 | 0 | 0 | 0 | UGUGUUAUCAGGUCGCCCCUG | 21 | 0 | 0 | 0 | 0 | 0 | 0 | UUGUGUUCUCAGGUCACUUU | 20 | 0 | 0 | 0 | 0 | 0 | 0 | UGUGUUCUCAGGUCGCUCCUG | 21 | 0 | 0 | 0 | 0 | 0 | 0 | UGGGUUCUCAGGUCGCCCCUG | 21 | 0 | 0 | 0 | 0 | 0 | 0 | CAUGUGUUCUCAGGUCGCCUC | 21 | 0 | 0 | 0 | 0 | 0 | 0 | UGUGUUCUCAGGUCACCCCU | 20 | 0 | 0 | 0 | 0 | 0 | 0 | UGUGUUCUCAGGUCGCCCCGG | 21 | 0 | 0 | 0 | 0 | 0 | 0 |
