# Supplementary material for: The tomato genome sequence provides insights into fleshy fruit evolution
Source: Springer Nature journal article supplement (doi:10.1038/nature11119), 2012-05-01
Supplement: 41586_2012_BFnature11119_MOESM69_ESM.zip [file 41586_2012_BFnature11119_MOESM69_ESM.zip › Supplementary_HTM_tables/Supplementary_HTM_Table_35_miR399_S01.htm]

|  |  |  |  |  |  |  |  |
| --- | --- | --- | --- | --- | --- | --- | --- |
| miRNA\_VARIANT\_SEQUENCE | Sz | L | L | L | L | L | L |
 UGCCAAAGGAGAGCUGCCCUG | 21 | 0 | 0 | 0 | 0 | 0 | 0 | UGCCAAAGGAGAGUUGCCCUA | 21 | 0 | 0 | 0 | 0 | 0 | 0 | CGCCAAAGGAGAGCUGCCCUG | 21 | 0 | 0 | 0 | 0 | 0 | 0 | UGCCAAAGGAGAAUUGCCCUG | 21 | 0 | 0 | 0 | 0 | 0 | 0 | CGCCAAAGGGGAGCUGCCCUA | 21 | 0 | 0 | 0 | 0 | 0 | 0 | UGCCAAAGUAGAGCUGCCCUG | 21 | 0 | 0 | 0 | 0 | 0 | 0 | GCCAAAGGAGAGUUGCCCUA | 20 | 0 | 0 | 0 | 0 | 0 | 0 | CGCCAAAGGAGAGCUGCCCUA | 21 | 0 | 0 | 0 | 0 | 0 | 0 | UGCCAAAGGAGAGUUGCCCU | 20 | 0 | 0 | 0 | 0 | 0 | 0 | CCAAAGGAGAGUUGCCCUAUG | 21 | 0 | 0 | 0 | 0 | 0 | 0 | UGCCAAAGGAGAGUUGCCCC | 20 | 0 | 0 | 0 | 0 | 0 | 0 | UGCCAAAGGAGCGCUGCCCUG | 21 | 0 | 0 | 0 | 0 | 0 | 0 | UGCCAAAGAAGAUUUGCCCCG | 21 | 0 | 0 | 0 | 0 | 0 | 0 | GCCAAAGGAGAGUUGCCCUU | 20 | 0 | 0 | 0 | 0 | 0 | 0 | CGCCAAAGGAGAACUGCCCUG | 21 | 0 | 0 | 0 | 0 | 0 | 0 | UGCCAAAGGAGAAUUGCCCU | 20 | 0 | 0 | 0 | 0 | 0 | 0 | UGCCAAAGGAGAGCUUCCCUG | 21 | 0 | 0 | 0 | 0 | 0 | 0 | UCUGCCAAAGGAGAGUUGCCC | 21 | 0 | 0 | 0 | 0 | 0 | 0 |
