# Supplementary material for: The tomato genome sequence provides insights into fleshy fruit evolution
Source: Springer Nature journal article supplement (doi:10.1038/nature11119), 2012-05-01
Supplement: 41586_2012_BFnature11119_MOESM69_ESM.zip [file 41586_2012_BFnature11119_MOESM69_ESM.zip › Supplementary_HTM_tables/Supplementary_HTM_Table_36_miR403_S01.htm]

|  |  |  |  |  |  |  |  |
| --- | --- | --- | --- | --- | --- | --- | --- |
| miRNA\_VARIANT\_SEQUENCE | Sz | L | L | L | L | L | L |
 CUAGAUUCACGCACAAGCUCG | 21 | 0 | 0 | 0 | 0 | 0 | 0 | CUAGAUUCACGCACAAACUCG | 21 | 0 | 0 | 0 | 0 | 0 | 0 | CUAGAUUCACGCACAAACUC | 20 | 0 | 0 | 0 | 0 | 0 | 0 | CUAGAUUCACGCACAAGCUC | 20 | 0 | 0 | 0 | 0 | 0 | 0 | CUAGAUUCACGCACAAGCUCGAA | 23 | 0 | 0 | 0 | 0 | 0 | 0 | CUAGAUUCACGCACAAACUCC | 21 | 0 | 0 | 0 | 0 | 0 | 0 | UAGAUUCACGCACAAACUCG | 20 | 0 | 0 | 0 | 0 | 0 | 0 | CUAGAUUCACGCACACGCUCG | 21 | 0 | 0 | 0 | 0 | 0 | 0 | AACUAGAUUCACGCACAAACUCG | 23 | 0 | 0 | 0 | 0 | 0 | 0 | CUAGAUUCACGCACAAGUUCG | 21 | 0 | 0 | 0 | 0 | 0 | 0 | CUAGAUUCACGCACAAACUU | 20 | 0 | 0 | 0 | 0 | 0 | 0 | CUAGAUUCACGCACAAGCUCGA | 22 | 0 | 0 | 0 | 0 | 0 | 0 | CUAGAUUCACGCACAAAUUU | 20 | 0 | 0 | 0 | 0 | 0 | 0 | CUAGAUUCACGCACAAACUCGAA | 23 | 0 | 0 | 0 | 0 | 0 | 0 | CUAGAUUAACGCACAAGCUCG | 21 | 0 | 0 | 0 | 0 | 0 | 0 | CUAGAUUCACGCACAAACUUUU | 22 | 0 | 0 | 0 | 0 | 0 | 0 | UAGAUUCACGCACAAACUCC | 20 | 0 | 0 | 0 | 0 | 0 | 0 | CUAGAUUCACGCACAAGCUAG | 21 | 0 | 0 | 0 | 0 | 0 | 0 | UAGAUUCACGCACAAACUCU | 20 | 0 | 0 | 0 | 0 | 0 | 0 | CUAGAUUCACGCACAAGCUCGU | 22 | 0 | 0 | 0 | 0 | 0 | 0 | AACUAGAUUCACGCACAAGCUCG | 23 | 0 | 0 | 0 | 0 | 0 | 0 | AUAGAUUCACGCACAAGCUCG | 21 | 0 | 0 | 0 | 0 | 0 | 0 | CUAGAUUCACGCAAAAGCUCG | 21 | 0 | 0 | 0 | 0 | 0 | 0 | CUAGAUUCACGCACAAACUUUUU | 23 | 0 | 0 | 0 | 0 | 0 | 0 | CUAGAUUCACGCACAAGCUCA | 21 | 0 | 0 | 0 | 0 | 0 | 0 | CUAGAUUCACGCACAAACUCCU | 22 | 0 | 0 | 0 | 0 | 0 | 0 | CUAGAUUCACGCACAAACUCU | 21 | 0 | 0 | 0 | 0 | 0 | 0 | CUAGAUUCACGCACACACUCG | 21 | 0 | 0 | 0 | 0 | 0 | 0 | CUAGAUUCACGCACAACCUCG | 21 | 0 | 0 | 0 | 0 | 0 | 0 | CUAGAUUCACGCACAAGCUCU | 21 | 0 | 0 | 0 | 0 | 0 | 0 |
