# Supplementary material for: The tomato genome sequence provides insights into fleshy fruit evolution
Source: Springer Nature journal article supplement (doi:10.1038/nature11119), 2012-05-01
Supplement: 41586_2012_BFnature11119_MOESM69_ESM.zip [file 41586_2012_BFnature11119_MOESM69_ESM.zip › Supplementary_HTM_tables/Supplementary_HTM_Table_37_miR408_S01.htm]

|  |  |  |  |  |  |  |  |
| --- | --- | --- | --- | --- | --- | --- | --- |
| miRNA\_VARIANT\_SEQUENCE | Sz | L | L | L | L | L | L |
 UGCACUGCCUCUUCCCUGGCU | 21 | 0 | 0 | 0 | 0 | 0 | 0 | UGCACAGCCUCUUCCCUGGUU | 21 | 0 | 0 | 0 | 0 | 0 | 0 | UGCACUGCCUCUUCCCUGGC | 20 | 0 | 0 | 0 | 0 | 0 | 0 | UGCACUGCCUCUUCCCUGGCUU | 22 | 0 | 0 | 0 | 0 | 0 | 0 | UGCACUGCCUCUUCCCUGGCUUUU | 24 | 0 | 0 | 0 | 0 | 0 | 0 | AUGCACUGCCUCUUCCCUGGC | 21 | 0 | 0 | 0 | 0 | 0 | 0 | UGCACUGCCUCUUCCCUGGCUCUC | 24 | 0 | 0 | 0 | 0 | 0 | 0 | CCAUGCACUGCCUCUUCCCUG | 21 | 0 | 0 | 0 | 0 | 0 | 0 | UGCACUGCCUCUCCCCUGGCU | 21 | 0 | 0 | 0 | 0 | 0 | 0 | UGCACAGCCUCUUCCCUGGUUU | 22 | 0 | 0 | 0 | 0 | 0 | 0 | UGCACUGCCUCUUCCCUGGUUU | 22 | 0 | 0 | 0 | 0 | 0 | 0 | UGCACUGCCUCUUCCCUGGUU | 21 | 0 | 0 | 0 | 0 | 0 | 0 | UGCACUGCCUCUUCCCUUGC | 20 | 0 | 0 | 0 | 0 | 0 | 0 | AAUGCACUGCCUCUUCCCUGGCU | 23 | 0 | 0 | 0 | 0 | 0 | 0 | UGCACUGCCUCUUCACUGGCU | 21 | 0 | 0 | 0 | 0 | 0 | 0 | UGCACUGCCUCUUCCCUGGCUAU | 23 | 0 | 0 | 0 | 0 | 0 | 0 | UGCACUGCCUCUUCCCUGUCU | 21 | 0 | 0 | 0 | 0 | 0 | 0 | UGCACUGCCUCUUCCCUUUAUUU | 23 | 0 | 0 | 0 | 0 | 0 | 0 | UGCACUGCCUCUUCCCUCGC | 20 | 0 | 0 | 0 | 0 | 0 | 0 | UGCACUGCCUCUUCCCUGGCUA | 22 | 0 | 0 | 0 | 0 | 0 | 0 | UGCACUGCCUCUUCCCUUUUUU | 22 | 0 | 0 | 0 | 0 | 0 | 0 | UGCACUGCCUCUUCCCUUUUA | 21 | 0 | 0 | 0 | 0 | 0 | 0 | UGCACUGCCUCUUUUCUGGCU | 21 | 0 | 0 | 0 | 0 | 0 | 0 | UGCACUGCCUCUUCCCUAUUUU | 22 | 0 | 0 | 0 | 0 | 0 | 0 | UGCACUGCCUCUUCCCUGGCUAA | 23 | 0 | 0 | 0 | 0 | 0 | 0 | UGCACAGCCUCUUCCCUGGU | 20 | 0 | 0 | 0 | 0 | 0 | 0 | UGCACUGCCUCUUCCCUGGCUC | 22 | 0 | 0 | 0 | 0 | 0 | 0 |
