# Supplementary material for: The tomato genome sequence provides insights into fleshy fruit evolution
Source: Springer Nature journal article supplement (doi:10.1038/nature11119), 2012-05-01
Supplement: 41586_2012_BFnature11119_MOESM69_ESM.zip [file 41586_2012_BFnature11119_MOESM69_ESM.zip › Supplementary_HTM_tables/Supplementary_HTM_Table_120_miR1436_S01.htm]

|  |  |  |  |  |  |  |  |
| --- | --- | --- | --- | --- | --- | --- | --- |
| miRNA\_VARIANT\_SEQUENCE | Sz | L | L | L | L | L | L |
 AACAAUAGUGGACGGAGGGAGUAC | 24 | 0 | 0 | 0 | 0 | 0 | 0 | UCUAAUAUGGGACGGAGGGAGUAA | 24 | 0 | 0 | 0 | 0 | 0 | 0 | AUAUAAAAUGGGACGGAGGGAGUA | 24 | 0 | 0 | 0 | 0 | 0 | 0 | CAUAAAAUGGGACGGAGGGAG | 21 | 0 | 0 | 0 | 0 | 0 | 0 | ACAUAAAAUGGGACGGAGGGAGU | 23 | 0 | 0 | 0 | 0 | 0 | 0 | AAACAAUAGUGGACGGAGGGAGU | 23 | 0 | 0 | 0 | 0 | 0 | 0 | UAUAAAAUGGGACGGAGGGAGUAC | 24 | 0 | 0 | 0 | 0 | 0 | 0 |
