# Supplementary material for: The tomato genome sequence provides insights into fleshy fruit evolution
Source: Springer Nature journal article supplement (doi:10.1038/nature11119), 2012-05-01
Supplement: 41586_2012_BFnature11119_MOESM69_ESM.zip [file 41586_2012_BFnature11119_MOESM69_ESM.zip › Supplementary_HTM_tables/Supplementary_HTM_Table_143_miR1863_S01.htm]

|  |  |  |  |  |  |  |  |
| --- | --- | --- | --- | --- | --- | --- | --- |
| miRNA\_VARIANT\_SEQUENCE | Sz | L | L | L | L | L | L |
 AAGCUCUGAUACCAUGUAGAAUUC | 24 | 0 | 0 | 0 | 0 | 0 | 0 | AAAGCUCUGAUACCAUGUAAGCUA | 24 | 0 | 0 | 0 | 0 | 0 | 0 | UCUGAUACCAUGUAAGAAUAUGA | 23 | 0 | 0 | 0 | 0 | 0 | 0 | AAAGCUCUGAUACCAUGUUAGAAU | 24 | 0 | 0 | 0 | 0 | 0 | 0 | CUGCUCUGAUACCAUGUUAAAUU | 23 | 0 | 0 | 0 | 0 | 0 | 0 | AUGCUCUGAUACCAUAUUAAAUUA | 24 | 0 | 0 | 0 | 0 | 0 | 0 | AAAGCUCUGAUACCAUGUAGAA | 22 | 0 | 0 | 0 | 0 | 0 | 0 | GAAGCUCUGAUACCAUGUGAGAA | 23 | 0 | 0 | 0 | 0 | 0 | 0 | UAUGCUCUGAUACCAUAUUAAA | 22 | 0 | 0 | 0 | 0 | 0 | 0 | UCUGAUACCAUGUUAGAAUUCA | 22 | 0 | 0 | 0 | 0 | 0 | 0 | CUGCUCUGAUACCAUGUUGAA | 21 | 0 | 0 | 0 | 0 | 0 | 0 | AUGCUCUGAUACCAUGUUAGAA | 22 | 0 | 0 | 0 | 0 | 0 | 0 | UCUGCUUUGAUACCAUGUUGA | 21 | 0 | 0 | 0 | 0 | 0 | 0 | AGCUCUGAUACCAUGUGAGAAGUA | 24 | 0 | 0 | 0 | 0 | 0 | 0 | AGCUCUGAUACCAUGUGAAGUUGA | 24 | 0 | 0 | 0 | 0 | 0 | 0 | AAGUACUGAUACCAUGUUAGAUU | 23 | 0 | 0 | 0 | 0 | 0 | 0 | GCUCUGAUACCAUGUUAAAUUAGG | 24 | 0 | 0 | 0 | 0 | 0 | 0 | UAAGCUCUGAUACCAUGUAGAA | 22 | 0 | 0 | 0 | 0 | 0 | 0 | AGCUCUGAUACCAUGUUAGAUUUC | 24 | 0 | 0 | 0 | 0 | 0 | 0 | AAAGCUCUGAUACCAUGUUGAAGU | 24 | 0 | 0 | 0 | 0 | 0 | 0 | UGCUCUGAUACCAUGUUAAAU | 21 | 0 | 0 | 0 | 0 | 0 | 0 | UAUGCUCUGAUACCAUAUUAAGU | 23 | 0 | 0 | 0 | 0 | 0 | 0 | UCUGCUCUGAUACCAUGUUGAA | 22 | 0 | 0 | 0 | 0 | 0 | 0 | AAAGCUCUGAUACCAUGUUAAGAA | 24 | 0 | 0 | 0 | 0 | 0 | 0 | CUUGCUCUGAUACCAUGAUAGAAU | 24 | 0 | 0 | 0 | 0 | 0 | 0 | AAGCUCUGAUACCGUGUUAGAAGU | 24 | 0 | 0 | 0 | 0 | 0 | 0 | AAGCUCUGAUACCGUGUUAGAAG | 23 | 0 | 0 | 0 | 0 | 0 | 0 | AGCUCUGAUACCAUGAUAGAUUUC | 24 | 0 | 0 | 0 | 0 | 0 | 0 | ACAGCUCUGAUACCAUGUAGAAUU | 24 | 0 | 0 | 0 | 0 | 0 | 0 | UUAGCUCUGAUACCAUGUAGAA | 22 | 0 | 0 | 0 | 0 | 0 | 0 | AUGCUCUGAUACCAAGUUUG | 20 | 0 | 0 | 0 | 0 | 0 | 0 | AGCUCUGAUACCAUGAUAGAUACA | 24 | 0 | 0 | 0 | 0 | 0 | 0 | AAGUACUGAUACCAUGUUAGAUUG | 24 | 0 | 0 | 0 | 0 | 0 | 0 | ACAGCUCUGAUACCAUGUUGAAGU | 24 | 0 | 0 | 0 | 0 | 0 | 0 | AUGCUCUGAUACCAUGUAAAAUUA | 24 | 0 | 0 | 0 | 0 | 0 | 0 | GAGGCUCUGAUACCAUGUGAGAA | 23 | 0 | 0 | 0 | 0 | 0 | 0 | CUAGCUCUGAUACCAUGUGAAGUU | 24 | 0 | 0 | 0 | 0 | 0 | 0 | AAGCUCUGAUACCAUGUAGAAUU | 23 | 0 | 0 | 0 | 0 | 0 | 0 | AAAGCUCUGAUACCAUGAUAGAUU | 24 | 0 | 0 | 0 | 0 | 0 | 0 | UCUGCUCUGAUACCAUGUUAGAAG | 24 | 0 | 0 | 0 | 0 | 0 | 0 | UGCUCUGAUACCAUGUUAAAUUAG | 24 | 0 | 0 | 0 | 0 | 0 | 0 | AAUGCUCUGAUACCAUGUGAGAA | 23 | 0 | 0 | 0 | 0 | 0 | 0 | UUGCUCUGAUACCAUGUUAAAAU | 23 | 0 | 0 | 0 | 0 | 0 | 0 | CUGCUCUGAUACCAUGUUAGAUU | 23 | 0 | 0 | 0 | 0 | 0 | 0 | AAGCUCUGAUACCAUGUGAGAAGU | 24 | 0 | 0 | 0 | 0 | 0 | 0 | AUAGCUCUGAUACCAUGUAGAA | 22 | 0 | 0 | 0 | 0 | 0 | 0 | CCUGCUCUGAUACCAUGUUAAAU | 23 | 0 | 0 | 0 | 0 | 0 | 0 | GCUCUGAUACCAUGUAGACAG | 21 | 0 | 0 | 0 | 0 | 0 | 0 | UAAGCUCUGAUACCAUGUAGAAUU | 24 | 0 | 0 | 0 | 0 | 0 | 0 | UCUGAUACCAUGUUAGAUUACGUC | 24 | 0 | 0 | 0 | 0 | 0 | 0 | AAGCUCUGAUACCAUGUAGAA | 21 | 0 | 0 | 0 | 0 | 0 | 0 | ACUGCUCUGAUACCAUGUAGA | 21 | 0 | 0 | 0 | 0 | 0 | 0 | UGCUCUGAUACCAUGAUAGAA | 21 | 0 | 0 | 0 | 0 | 0 | 0 | AGUGCUCUGAUACCAUGAUAGAAU | 24 | 0 | 0 | 0 | 0 | 0 | 0 | UCUGAUACCAUGUAGAAUUC | 20 | 0 | 0 | 0 | 0 | 0 | 0 |
