# Supplementary material for: The tomato genome sequence provides insights into fleshy fruit evolution
Source: Springer Nature journal article supplement (doi:10.1038/nature11119), 2012-05-01
Supplement: 41586_2012_BFnature11119_MOESM69_ESM.zip [file 41586_2012_BFnature11119_MOESM69_ESM.zip › Supplementary_HTM_tables/Supplementary_HTM_Table_148_miR1873_S01.htm]

|  |  |  |  |  |  |  |  |
| --- | --- | --- | --- | --- | --- | --- | --- |
| miRNA\_VARIANT\_SEQUENCE | Sz | L | L | L | L | L | L |
 CAUGGUAUCAGAGCAGGACCCG | 22 | 0 | 0 | 0 | 0 | 0 | 0 | AACGAACAUGGUAUCAGAGU | 20 | 0 | 0 | 0 | 0 | 0 | 0 | ACAUGGUAUUAGAGCAGGCAGAG | 23 | 0 | 0 | 0 | 0 | 0 | 0 | UCAACAUGGUAUCAGAGAUUGCAG | 24 | 0 | 0 | 0 | 0 | 0 | 0 | CAUGGUAUCAGAGCAGGAACGU | 22 | 0 | 0 | 0 | 0 | 0 | 0 | UGGGAUCAGAGAGGGAAGUA | 20 | 0 | 0 | 0 | 0 | 0 | 0 | UCAACAUGGUAUCAGAGCAGACA | 23 | 0 | 0 | 0 | 0 | 0 | 0 | ACUUAAUACGGUAUCAGAGCU | 21 | 0 | 0 | 0 | 0 | 0 | 0 | AACAUGGUAUCAGAGAUUGCA | 21 | 0 | 0 | 0 | 0 | 0 | 0 | ACAUGGUAUCAGAGUAGGCAG | 21 | 0 | 0 | 0 | 0 | 0 | 0 | AACAUGAUAUCAGAGCUGACA | 21 | 0 | 0 | 0 | 0 | 0 | 0 | UUUAACAUGGUAUCAGAGCAGA | 22 | 0 | 0 | 0 | 0 | 0 | 0 | ACAUGGUAUCAGAGCAGGUAGAUG | 24 | 0 | 0 | 0 | 0 | 0 | 0 | AACAUGGUAUUAGAGCAGGUAGAG | 24 | 0 | 0 | 0 | 0 | 0 | 0 | UGAUAUCAGAGCUUCAAGGA | 20 | 0 | 0 | 0 | 0 | 0 | 0 | UCAACAUGGUAUCAGAGCAGAGAG | 24 | 0 | 0 | 0 | 0 | 0 | 0 | AACAUGGUAUCAGAGCAGGUAGAA | 24 | 0 | 0 | 0 | 0 | 0 | 0 | AUUUAACAUGGUAUCAGAGCAGGG | 24 | 0 | 0 | 0 | 0 | 0 | 0 | AUUUAACAUGGUAUCAGAGCA | 21 | 0 | 0 | 0 | 0 | 0 | 0 |
