# Supplementary material for: The tomato genome sequence provides insights into fleshy fruit evolution
Source: Springer Nature journal article supplement (doi:10.1038/nature11119), 2012-05-01
Supplement: 41586_2012_BFnature11119_MOESM69_ESM.zip [file 41586_2012_BFnature11119_MOESM69_ESM.zip › Supplementary_HTM_tables/Supplementary_HTM_Table_154_miR1916_S01.htm]

|  |  |  |  |  |  |  |  |
| --- | --- | --- | --- | --- | --- | --- | --- |
| miRNA\_VARIANT\_SEQUENCE | Sz | L | L | L | L | L | L |
 UUCAUUUAGACACUUCAACU | 20 | 0 | 0 | 0 | 0 | 0 | 0 | AAAUUCACUUAGACACUUCAACAU | 24 | 0 | 0 | 0 | 0 | 0 | 0 | UAAUUCACUUAGACACCUCAA | 21 | 0 | 0 | 0 | 0 | 0 | 0 | AUAUUUCAUUUGGACACCUUAAUU | 24 | 0 | 0 | 0 | 0 | 0 | 0 | AUUUCACUUAGACACUUCAACUAG | 24 | 0 | 0 | 0 | 0 | 0 | 0 | UUCACUUAGACACCUCAACUU | 21 | 0 | 0 | 0 | 0 | 0 | 0 | UUCACUUAGACGCUUCAACUA | 21 | 0 | 0 | 0 | 0 | 0 | 0 | AAUUCACUUAGACACCUCAACUGA | 24 | 0 | 0 | 0 | 0 | 0 | 0 | AUAUUUCACUUGAACAUCUCAACU | 24 | 0 | 0 | 0 | 0 | 0 | 0 | ACUUUCACUUAGGCAUCUCAA | 21 | 0 | 0 | 0 | 0 | 0 | 0 | AUAUUUCAUUUAGACACCUUAAUU | 24 | 0 | 0 | 0 | 0 | 0 | 0 | AUAAUUCACUUAGACACCUCAACU | 24 | 0 | 0 | 0 | 0 | 0 | 0 | AUAAUUCACUUAGACACCUCAA | 22 | 0 | 0 | 0 | 0 | 0 | 0 | UAUUUCAUUUGAACACCUCAAUU | 23 | 0 | 0 | 0 | 0 | 0 | 0 | AUAUUUCAGUUAGACACUUCAACU | 24 | 0 | 0 | 0 | 0 | 0 | 0 | AUUUCAGUUAGACACCUCAAACAA | 24 | 0 | 0 | 0 | 0 | 0 | 0 | AUAUUUCACUUAGACAUCUCAAUU | 24 | 0 | 0 | 0 | 0 | 0 | 0 | UAAUUCACUUAGACACUUCAACU | 23 | 0 | 0 | 0 | 0 | 0 | 0 | AUUUUCACUUAGACGUCUCAAUU | 23 | 0 | 0 | 0 | 0 | 0 | 0 | AUAUUUCACUUAGACACCUUAACC | 24 | 0 | 0 | 0 | 0 | 0 | 0 | AUAUUUCACUUAAACACUUUAACU | 24 | 0 | 0 | 0 | 0 | 0 | 0 | GACUUUCACUUAGACGCUUCAACU | 24 | 0 | 0 | 0 | 0 | 0 | 0 | AUUUCACUUAGACACUUCAAAUCA | 24 | 0 | 0 | 0 | 0 | 0 | 0 | AUAAUUCACUUAGACACCUCA | 21 | 0 | 0 | 0 | 0 | 0 | 0 | AAUUCACUUAGACGCCUCAACUU | 23 | 0 | 0 | 0 | 0 | 0 | 0 | UUCAGUUAGACACCUCAAGUA | 21 | 0 | 0 | 0 | 0 | 0 | 0 | UAAUUCACUUAGACACCUCAACU | 23 | 0 | 0 | 0 | 0 | 0 | 0 | UAAUUCACUUAGACAUCUCAACUA | 24 | 0 | 0 | 0 | 0 | 0 | 0 | AUAUUUCACUUAGACACUUCAACU | 24 | 0 | 0 | 0 | 0 | 0 | 0 | UAAUUCACUUAGACUCCUCA | 20 | 0 | 0 | 0 | 0 | 0 | 0 | AUAUUUCACUUAAACACCUCAACU | 24 | 0 | 0 | 0 | 0 | 0 | 0 | AUAUUUCACUUAGACACCUCAAUC | 24 | 0 | 0 | 0 | 0 | 0 | 0 | AUAUUUCACUUGGACACCUCAAUU | 24 | 0 | 0 | 0 | 0 | 0 | 0 | UAAUUCACUUAGACACUUCA | 20 | 0 | 0 | 0 | 0 | 0 | 0 | AAUUCACUUAGACACCUCAACUAG | 24 | 0 | 0 | 0 | 0 | 0 | 0 | AUAUUUCAUUUAGACACCUCAAUU | 24 | 0 | 0 | 0 | 0 | 0 | 0 | UUUUCACUUAGACACAUCAAUU | 22 | 0 | 0 | 0 | 0 | 0 | 0 | AUAUUUCACUUAGACACCUCA | 21 | 0 | 0 | 0 | 0 | 0 | 0 | AUAAUUCACUUAGACACUUCAACU | 24 | 0 | 0 | 0 | 0 | 0 | 0 | UAAUUCACUUAGAUACCUCA | 20 | 0 | 0 | 0 | 0 | 0 | 0 | AUUUCAGUUAGACACCUCAAGAAA | 24 | 0 | 0 | 0 | 0 | 0 | 0 | UAAUUCACUUAGACACUUCAA | 21 | 0 | 0 | 0 | 0 | 0 | 0 | AUAUUUCACUUAGACACCUUA | 21 | 0 | 0 | 0 | 0 | 0 | 0 | UUUCACUUAGACGCUUCAACU | 21 | 0 | 0 | 0 | 0 | 0 | 0 | AUAUUUCAGUUAGACACCUCAAGA | 24 | 0 | 0 | 0 | 0 | 0 | 0 | ACUUUCACUUAGACGCCUUAACU | 23 | 0 | 0 | 0 | 0 | 0 | 0 | AUAUUUCAGUUAGACACCUCAAAC | 24 | 0 | 0 | 0 | 0 | 0 | 0 | UAAUUCACUUAGACACCUCA | 20 | 0 | 0 | 0 | 0 | 0 | 0 |
