# Supplementary material for: The tomato genome sequence provides insights into fleshy fruit evolution
Source: Springer Nature journal article supplement (doi:10.1038/nature11119), 2012-05-01
Supplement: 41586_2012_BFnature11119_MOESM69_ESM.zip [file 41586_2012_BFnature11119_MOESM69_ESM.zip › Supplementary_HTM_tables/Supplementary_HTM_Table_167_miR2118_S01.htm]

|  |  |  |  |  |  |  |  |
| --- | --- | --- | --- | --- | --- | --- | --- |
| miRNA\_VARIANT\_SEQUENCE | Sz | L | L | L | L | L | L |
 UUACCGAUUCCCCCCAUUCCAA | 22 | 0 | 0 | 0 | 0 | 0 | 0 | UUACCGAUUCCCCCCAUUCCA | 21 | 0 | 0 | 0 | 0 | 0 | 0 | UUACCGAUUCCCCCCCUUCCAA | 22 | 0 | 0 | 0 | 0 | 0 | 0 | UUACCGAUUCUCCCCAUUCCAA | 22 | 0 | 0 | 0 | 0 | 0 | 0 | UUACCGAUUCCCCCCAUUCCCA | 22 | 0 | 0 | 0 | 0 | 0 | 0 | UUACCGAUUCCCCCCAUUCCAU | 22 | 0 | 0 | 0 | 0 | 0 | 0 | UUACCGAUUCCCCCCAUUCCAC | 22 | 0 | 0 | 0 | 0 | 0 | 0 | UUACCGAUUCCCCCCAUUCC | 20 | 0 | 0 | 0 | 0 | 0 | 0 | UUACCGAUUUCCCCCAUUCCAA | 22 | 0 | 0 | 0 | 0 | 0 | 0 | UUACCGAUUCCCCUCAUUCCAA | 22 | 0 | 0 | 0 | 0 | 0 | 0 | UUACCGAUUCCACCCAUUCCAA | 22 | 0 | 0 | 0 | 0 | 0 | 0 | UUACCGAUUCCCUCCAUUCCAA | 22 | 0 | 0 | 0 | 0 | 0 | 0 | UUACCGAUUCCCCCCAUUCCAAU | 23 | 0 | 0 | 0 | 0 | 0 | 0 | UUACCGAUUCCCCCCAUUCCAAA | 23 | 0 | 0 | 0 | 0 | 0 | 0 | UUACCGAUCCCCCCCAUUCCAA | 22 | 0 | 0 | 0 | 0 | 0 | 0 | UCUUACCGAUUCCCCCCAUUCC | 22 | 0 | 0 | 0 | 0 | 0 | 0 | UUACCGAUUCCUUCCAUUCCAA | 22 | 0 | 0 | 0 | 0 | 0 | 0 | UUACCGAUUCCCCCCAUUCCAAC | 23 | 0 | 0 | 0 | 0 | 0 | 0 | UUACCGAUUCCCCCCAUUCCUA | 22 | 0 | 0 | 0 | 0 | 0 | 0 | UACCGAUUCCCCCCAUUCCAA | 21 | 0 | 0 | 0 | 0 | 0 | 0 | UUACCGAUUCCCCCCAUUCCAUUU | 24 | 0 | 0 | 0 | 0 | 0 | 0 | UUACCGAUACCCCCCAUUCCAA | 22 | 0 | 0 | 0 | 0 | 0 | 0 | UUACCGAUUCCCCCCAUUCU | 20 | 0 | 0 | 0 | 0 | 0 | 0 | UUACCGAUUCCCCCCAUUUCAA | 22 | 0 | 0 | 0 | 0 | 0 | 0 | UCUUACCGAUUCCCCCCAUUCCA | 23 | 0 | 0 | 0 | 0 | 0 | 0 | UUACCGAUUCCCCCCAUUCCAAAA | 24 | 0 | 0 | 0 | 0 | 0 | 0 | UUACCGCUUCCCCCCAUUCCAA | 22 | 0 | 0 | 0 | 0 | 0 | 0 | UUACCGAUUCCCCCCCUUCCCA | 22 | 0 | 0 | 0 | 0 | 0 | 0 | UUACCGAUUCUUCCCAUUCCAA | 22 | 0 | 0 | 0 | 0 | 0 | 0 | UUACCGAUUCCUCCCAUUCCAA | 22 | 0 | 0 | 0 | 0 | 0 | 0 | UACCGAUUCCCCCCAUUCCAAU | 22 | 0 | 0 | 0 | 0 | 0 | 0 |
