# Supplementary material for: The tomato genome sequence provides insights into fleshy fruit evolution
Source: Springer Nature journal article supplement (doi:10.1038/nature11119), 2012-05-01
Supplement: 41586_2012_BFnature11119_MOESM69_ESM.zip [file 41586_2012_BFnature11119_MOESM69_ESM.zip › Supplementary_HTM_tables/Supplementary_HTM_Table_185_miR2911_S01.htm]

|  |  |  |  |  |  |  |  |
| --- | --- | --- | --- | --- | --- | --- | --- |
| miRNA\_VARIANT\_SEQUENCE | Sz | L | L | L | L | L | L |
 GCCGGGGGACGGACUGGGAA | 20 | 0 | 0 | 0 | 0 | 0 | 0 | CCGGCCGGGGGACGGACUGG | 20 | 0 | 0 | 0 | 0 | 0 | 0 | GGCCGGGGGACGGACUGGGA | 20 | 0 | 0 | 0 | 0 | 0 | 0 | GGCCGGGGGACGGACUGGGAA | 21 | 0 | 0 | 0 | 0 | 0 | 0 | CGGCCGGGGGACGGACUGGGA | 21 | 0 | 0 | 0 | 0 | 0 | 0 | CCGGCCGGGGGACGGACUGGG | 21 | 0 | 0 | 0 | 0 | 0 | 0 | CGGCCGGGGGACGGACUGGG | 20 | 0 | 0 | 0 | 0 | 0 | 0 | CCGGGGGACGGACUGGGAACGG | 22 | 0 | 0 | 0 | 0 | 0 | 0 | CCGGCCGGGGGACGGACUGGGA | 22 | 0 | 0 | 0 | 0 | 0 | 0 | CCGGGGGACGGACUGGGAAC | 20 | 0 | 0 | 0 | 0 | 0 | 0 | CGGCCGGGGGACGGACUGGGAA | 22 | 0 | 0 | 0 | 0 | 0 | 0 | CCGGCCGGGGGGCGGACUGG | 20 | 0 | 0 | 0 | 0 | 0 | 0 | GCCGGGGGACGGACUGGGAACGG | 23 | 0 | 0 | 0 | 0 | 0 | 0 | GCCGGGGGCCGGACUGGGAAC | 21 | 0 | 0 | 0 | 0 | 0 | 0 | CCGGCCGGGGGACGGCCUGG | 20 | 0 | 0 | 0 | 0 | 0 | 0 | GGCCGGGGGACGGACUGGAA | 20 | 0 | 0 | 0 | 0 | 0 | 0 | CCGGCCGGGGGACGGACUUU | 20 | 0 | 0 | 0 | 0 | 0 | 0 | CGGCCGGGGGACGGACUGAA | 20 | 0 | 0 | 0 | 0 | 0 | 0 | GGCCGGGGGACGGACUGGCA | 20 | 0 | 0 | 0 | 0 | 0 | 0 | GCCGCCGGGGGACGGACUGGG | 21 | 0 | 0 | 0 | 0 | 0 | 0 | CCGGCCGGGGGGCGGACUGGG | 21 | 0 | 0 | 0 | 0 | 0 | 0 | CGGCCGGGGGACGGACUGGGCA | 22 | 0 | 0 | 0 | 0 | 0 | 0 | CCGGCCGGGGGACGGGCUGGGA | 22 | 0 | 0 | 0 | 0 | 0 | 0 | GGCCGGGGGACGGACUGGGAAA | 22 | 0 | 0 | 0 | 0 | 0 | 0 | CGGCCGGGGGACGGACUGGGAAC | 23 | 0 | 0 | 0 | 0 | 0 | 0 | GGCCGGGGGACGGCCUGGGA | 20 | 0 | 0 | 0 | 0 | 0 | 0 | GGCCGGGGGGCGGACUGGGA | 20 | 0 | 0 | 0 | 0 | 0 | 0 | GGCCGGGGGACGGACUGGGCAC | 22 | 0 | 0 | 0 | 0 | 0 | 0 | CCGGCCGGGGGACGGCCUGGG | 21 | 0 | 0 | 0 | 0 | 0 | 0 | GCCGGGGGACGGACUGGGAC | 20 | 0 | 0 | 0 | 0 | 0 | 0 | GCCGGGGGACGGACUGGGAG | 20 | 0 | 0 | 0 | 0 | 0 | 0 | CCGGCCGGGGGGCGGACUGGGA | 22 | 0 | 0 | 0 | 0 | 0 | 0 | GCCGGGGGACGGACUGGGAU | 20 | 0 | 0 | 0 | 0 | 0 | 0 | GGCCGGGGGACGGACUGGGAACG | 23 | 0 | 0 | 0 | 0 | 0 | 0 | GCCGGGGGACGGACUGGGGAC | 21 | 0 | 0 | 0 | 0 | 0 | 0 | CCGGCCGGGGGACGGACCGG | 20 | 0 | 0 | 0 | 0 | 0 | 0 | GCCGGGGGACGGACUGGGCAC | 21 | 0 | 0 | 0 | 0 | 0 | 0 | GGCCGGGGGACGGACUGGGAU | 21 | 0 | 0 | 0 | 0 | 0 | 0 | CCGGCCGGGGGCCGGACUGG | 20 | 0 | 0 | 0 | 0 | 0 | 0 | CGGCCGGGGGACGGACUGGGAACG | 24 | 0 | 0 | 0 | 0 | 0 | 0 | GGCCGGGGGACGGACUGGGAAAA | 23 | 0 | 0 | 0 | 0 | 0 | 0 | GCCGGGGGACGGACUGGGAACG | 22 | 0 | 0 | 0 | 0 | 0 | 0 | GCCGGGGGACGGACUGGGAAC | 21 | 0 | 0 | 0 | 0 | 0 | 0 | CCGGCCGGGGGACGGACUGGAA | 22 | 0 | 0 | 0 | 0 | 0 | 0 | GCCGGGGGCCGGACUGGGAA | 20 | 0 | 0 | 0 | 0 | 0 | 0 | CCGGCCGGGGGACGGACUGAA | 21 | 0 | 0 | 0 | 0 | 0 | 0 | CCGGCCGGGGGACGGACUGGGAA | 23 | 0 | 0 | 0 | 0 | 0 | 0 | GGCCGGGGGCCGGACUGGGA | 20 | 0 | 0 | 0 | 0 | 0 | 0 | CCGGCCGGGGGACGGACUGGGAAC | 24 | 0 | 0 | 0 | 0 | 0 | 0 | GCCGGGGGACGGGCUGGGAA | 20 | 0 | 0 | 0 | 0 | 0 | 0 | CCGGCCGGGGGCCGGCCUGG | 20 | 0 | 0 | 0 | 0 | 0 | 0 | GCCGGGGGACGGACUGGGGA | 20 | 0 | 0 | 0 | 0 | 0 | 0 | GCCGGGGGACGGACCGGGAACA | 22 | 0 | 0 | 0 | 0 | 0 | 0 | GCCGGGGGACGGACUGGGCA | 20 | 0 | 0 | 0 | 0 | 0 | 0 | CCGGCCGGGGGACGGGCUGG | 20 | 0 | 0 | 0 | 0 | 0 | 0 | CGGCCGGGGGACGGACUGGU | 20 | 0 | 0 | 0 | 0 | 0 | 0 | GCCGGGGGGCGGACUGGGGA | 20 | 0 | 0 | 0 | 0 | 0 | 0 | CGGCCGGGGGACGGGCUGGG | 20 | 0 | 0 | 0 | 0 | 0 | 0 | CCGGGGGACGGACUGGGAACA | 21 | 0 | 0 | 0 | 0 | 0 | 0 | GGCCGGGGGGCGGACUGGGAA | 21 | 0 | 0 | 0 | 0 | 0 | 0 | GCCGGGGGACGGACUGCGAAC | 21 | 0 | 0 | 0 | 0 | 0 | 0 | CCGGCCGGGGGACGGGCUGGGAA | 23 | 0 | 0 | 0 | 0 | 0 | 0 | CCGGCCGGGGGACGGACUGGGC | 22 | 0 | 0 | 0 | 0 | 0 | 0 | AACGGGGGACGGACUGGGAA | 20 | 0 | 0 | 0 | 0 | 0 | 0 | GCCGGGGGACGGACUGGGAAA | 21 | 0 | 0 | 0 | 0 | 0 | 0 | CGGCCGGGGGACGGACUGGGAAA | 23 | 0 | 0 | 0 | 0 | 0 | 0 | GGCCGGGGGCCGGACUGGGG | 20 | 0 | 0 | 0 | 0 | 0 | 0 | GGCCGGGGGACGGACUGGGAG | 21 | 0 | 0 | 0 | 0 | 0 | 0 | GUCGGGGGACGGACUGGGGA | 20 | 0 | 0 | 0 | 0 | 0 | 0 | GGCGGGGGACGGACUGGGAA | 20 | 0 | 0 | 0 | 0 | 0 | 0 | GGCCGGGGGACGGACUGGGAACGG | 24 | 0 | 0 | 0 | 0 | 0 | 0 | GGCCGGGGGACGGACUGGGAAC | 22 | 0 | 0 | 0 | 0 | 0 | 0 | GGCCGGGGGACGGACUGGGCA | 21 | 0 | 0 | 0 | 0 | 0 | 0 | UCGGCCGGGGGACGGACUGGG | 21 | 0 | 0 | 0 | 0 | 0 | 0 | GCCGGGGGACGGACUGGGACC | 21 | 0 | 0 | 0 | 0 | 0 | 0 | CCGGCCGGGGGACGGACUGGGG | 22 | 0 | 0 | 0 | 0 | 0 | 0 | CCGGCCGGGGGACGGGCUGGG | 21 | 0 | 0 | 0 | 0 | 0 | 0 | GGCCGGGGGACGGGCUGGGA | 20 | 0 | 0 | 0 | 0 | 0 | 0 | GGCCGGGGGACGGACUGGUA | 20 | 0 | 0 | 0 | 0 | 0 | 0 | UGGCCGGGGGACGGACUGGG | 20 | 0 | 0 | 0 | 0 | 0 | 0 | CCGGGGGACGGACUGGGAAA | 20 | 0 | 0 | 0 | 0 | 0 | 0 | CCGGGGGACGGACUGGGAAUGG | 22 | 0 | 0 | 0 | 0 | 0 | 0 | GGCCGGGGGACGGACUGGGG | 20 | 0 | 0 | 0 | 0 | 0 | 0 | GCCGGGGGACGGACUGGAAA | 20 | 0 | 0 | 0 | 0 | 0 | 0 | CGGCCGGGGGCCGGACUGGG | 20 | 0 | 0 | 0 | 0 | 0 | 0 | GCCGGGGGACGGCCUGGGAA | 20 | 0 | 0 | 0 | 0 | 0 | 0 | CCGGCCGGGGGACGGACGGGG | 21 | 0 | 0 | 0 | 0 | 0 | 0 | GCCGGGGGACGGAUUGGGAA | 20 | 0 | 0 | 0 | 0 | 0 | 0 | CCGGGGGACGGACUGGGAAAA | 21 | 0 | 0 | 0 | 0 | 0 | 0 | CCGGCCGGGGGGCGGACUGGGAA | 23 | 0 | 0 | 0 | 0 | 0 | 0 | CCGGGGGACGGACUGGGAACG | 21 | 0 | 0 | 0 | 0 | 0 | 0 | CGGCCGGGGGGCGGACUGGG | 20 | 0 | 0 | 0 | 0 | 0 | 0 | GGCCGGGGGACGGACUGGGGA | 21 | 0 | 0 | 0 | 0 | 0 | 0 | CGGCCGGGGGACGGACUGGGAACA | 24 | 0 | 0 | 0 | 0 | 0 | 0 | CCGGCCGGGGGGCGGGCUGGGG | 22 | 0 | 0 | 0 | 0 | 0 | 0 | GCCGGGGGAUGGACUGGGAAC | 21 | 0 | 0 | 0 | 0 | 0 | 0 | GGCCGGGGGACGGACUGGGC | 20 | 0 | 0 | 0 | 0 | 0 | 0 | CGGCCGGGGGACGGACUGGGGA | 22 | 0 | 0 | 0 | 0 | 0 | 0 | GCCGGGGGGCGGACUGGGAA | 20 | 0 | 0 | 0 | 0 | 0 | 0 | GCCGGGGGACGGACUGGGCC | 20 | 0 | 0 | 0 | 0 | 0 | 0 |
