# Supplementary material for: The tomato genome sequence provides insights into fleshy fruit evolution
Source: Springer Nature journal article supplement (doi:10.1038/nature11119), 2012-05-01
Supplement: 41586_2012_BFnature11119_MOESM69_ESM.zip [file 41586_2012_BFnature11119_MOESM69_ESM.zip › Supplementary_HTM_tables/Supplementary_HTM_Table_186_miR2916_S01.htm]

|  |  |  |  |  |  |  |  |
| --- | --- | --- | --- | --- | --- | --- | --- |
| miRNA\_VARIANT\_SEQUENCE | Sz | L | L | L | L | L | L |
 UGGGGGCUCGAAGACGAUCAG | 21 | 0 | 0 | 0 | 0 | 0 | 0 | GUUGGGGGCUCGAAGACGAUCA | 22 | 0 | 0 | 0 | 0 | 0 | 0 | GGGCUCGAAGACGAUCAGAUA | 21 | 0 | 0 | 0 | 0 | 0 | 0 | GGGGCUCGAAGACGAUCAGAUA | 22 | 0 | 0 | 0 | 0 | 0 | 0 | GUUGGGGGCUCGAAGACGAUCAG | 23 | 0 | 0 | 0 | 0 | 0 | 0 | UUGGGGGCUCGAAGACGAUCA | 21 | 0 | 0 | 0 | 0 | 0 | 0 | GGGGCUCGAAGACGAUCAGA | 20 | 0 | 0 | 0 | 0 | 0 | 0 | GGGGCUCGAAGACGAUCAGAU | 21 | 0 | 0 | 0 | 0 | 0 | 0 | GGCUCGAAGACGAUCAGAUA | 20 | 0 | 0 | 0 | 0 | 0 | 0 | UGGGGGCUCGAAGACGAUCAGA | 22 | 0 | 0 | 0 | 0 | 0 | 0 | GGCUCGAAGACGAUCAGAUAC | 21 | 0 | 0 | 0 | 0 | 0 | 0 | UUGGGGGCUCGAAGACGAUCAG | 22 | 0 | 0 | 0 | 0 | 0 | 0 | UGGGGGCUCGAAGACGAUCA | 20 | 0 | 0 | 0 | 0 | 0 | 0 | GUUGGGGGCUCGAAGACGAUCAGA | 24 | 0 | 0 | 0 | 0 | 0 | 0 | UUGGGGGCUCGAAGACGAUCAGA | 23 | 0 | 0 | 0 | 0 | 0 | 0 | GGGGCUCGAAGACGAUCAGAUACC | 24 | 0 | 0 | 0 | 0 | 0 | 0 | GGGCUCGAAGACGAUCAGAU | 20 | 0 | 0 | 0 | 0 | 0 | 0 | GGGGCUCGAAGACGAUCAGAUAC | 23 | 0 | 0 | 0 | 0 | 0 | 0 | GUUGGGGGCUCGAAGACGAUC | 21 | 0 | 0 | 0 | 0 | 0 | 0 | GGGGGCUCGAAGACGAUCAG | 20 | 0 | 0 | 0 | 0 | 0 | 0 | GUUGGGGGCUCGAAGACGAU | 20 | 0 | 0 | 0 | 0 | 0 | 0 | GGGGGCUCGAAGACGAUCAGAU | 22 | 0 | 0 | 0 | 0 | 0 | 0 | GGGGGCUCGAAGACGAUCAGAUA | 23 | 0 | 0 | 0 | 0 | 0 | 0 | GGGGGCUCGAAGACGAUCAGAUAC | 24 | 0 | 0 | 0 | 0 | 0 | 0 | GGCUCGAAGACGAUCAGAUACC | 22 | 0 | 0 | 0 | 0 | 0 | 0 | GGGGGCUCGAAGACGAUCAGA | 21 | 0 | 0 | 0 | 0 | 0 | 0 | UGGGGGCUCGAAGACGAUCAGAU | 23 | 0 | 0 | 0 | 0 | 0 | 0 | GGGCUCGAAGACGAUCAGAUAC | 22 | 0 | 0 | 0 | 0 | 0 | 0 | GGGCUCGAAGACGAUCAGAUACC | 23 | 0 | 0 | 0 | 0 | 0 | 0 | UUGGGGGCUCGAAGACGAUC | 20 | 0 | 0 | 0 | 0 | 0 | 0 | UGGGGGCUCGAAGACGAUCAGAUA | 24 | 0 | 0 | 0 | 0 | 0 | 0 | UUGGGGGCUCGAAGACGAUCAGAU | 24 | 0 | 0 | 0 | 0 | 0 | 0 | GCUCGAAGACGAUCAGAUACC | 21 | 0 | 0 | 0 | 0 | 0 | 0 | GUUGGGGGCUCGAAGCCGAUCAGA | 24 | 0 | 0 | 0 | 0 | 0 | 0 | GGGGGCUCGAAGACGAUCCGAUA | 23 | 0 | 0 | 0 | 0 | 0 | 0 | UUGGGGGCUCGAAGACGAUCU | 21 | 0 | 0 | 0 | 0 | 0 | 0 | GGCUCGAAGACGAUCAGAUAU | 21 | 0 | 0 | 0 | 0 | 0 | 0 | GGGGGCUCGAAGACGAUUAGA | 21 | 0 | 0 | 0 | 0 | 0 | 0 | GUUGGGGGCUCGAAGACGAUUAG | 23 | 0 | 0 | 0 | 0 | 0 | 0 | GGGGCUCGAAGAUGAUCAGAUAC | 23 | 0 | 0 | 0 | 0 | 0 | 0 | GUUGGGGGCUCGAAGACGAGCA | 22 | 0 | 0 | 0 | 0 | 0 | 0 | UUGGGGGCUCGAAGACGAUUAU | 22 | 0 | 0 | 0 | 0 | 0 | 0 | UUGGGGGCUCGAAGACGAUU | 20 | 0 | 0 | 0 | 0 | 0 | 0 | GGCUCGAAGACGAUCAGCUAC | 21 | 0 | 0 | 0 | 0 | 0 | 0 | GUUGGGGGCUCGAAGUCGAUC | 21 | 0 | 0 | 0 | 0 | 0 | 0 | GGGGGCUCUAAGACGAUCAG | 20 | 0 | 0 | 0 | 0 | 0 | 0 | UUGGGGGCUCGAAGACGAUCAGU | 23 | 0 | 0 | 0 | 0 | 0 | 0 | GGGGCUCGAAGACGAUCAGCU | 21 | 0 | 0 | 0 | 0 | 0 | 0 | GGGCUCGAAGACGAUCAGAUC | 21 | 0 | 0 | 0 | 0 | 0 | 0 | UUGGGGGCUCGAAGACGAUCCG | 22 | 0 | 0 | 0 | 0 | 0 | 0 | UGGGGGCUCGAAGACGAUCAGU | 22 | 0 | 0 | 0 | 0 | 0 | 0 | GUUGGGGGCUCGAAGACUAUCAGA | 24 | 0 | 0 | 0 | 0 | 0 | 0 | AGUUGGGGCUCGAAGACGAUCA | 22 | 0 | 0 | 0 | 0 | 0 | 0 | GGCUCGAAGACGAUCAGAUU | 20 | 0 | 0 | 0 | 0 | 0 | 0 | GGGCUCGAAGACGCUCAGAUA | 21 | 0 | 0 | 0 | 0 | 0 | 0 | GGCUCGAAGACGAUUAGAUAC | 21 | 0 | 0 | 0 | 0 | 0 | 0 | GUUGGGGGCUCGAAGACGAUCAGU | 24 | 0 | 0 | 0 | 0 | 0 | 0 | GUUGGGGCCUCGAAGACGAUCA | 22 | 0 | 0 | 0 | 0 | 0 | 0 | GUUGGGGGCUCGCAGACGAUCC | 22 | 0 | 0 | 0 | 0 | 0 | 0 | UGGGGCUCGAAGACGAUCAGAUA | 23 | 0 | 0 | 0 | 0 | 0 | 0 | UGGGGGCUCGAAGACGAUCGGA | 22 | 0 | 0 | 0 | 0 | 0 | 0 | UUGGGGGCUCGAAGACGAUCAU | 22 | 0 | 0 | 0 | 0 | 0 | 0 | GGGGGCUCGAAGAAGAUCAG | 20 | 0 | 0 | 0 | 0 | 0 | 0 | UUGUGGGCUCGAAGACGAUCA | 21 | 0 | 0 | 0 | 0 | 0 | 0 | UGGGGGCUCGAAGAAGAUCAG | 21 | 0 | 0 | 0 | 0 | 0 | 0 | GUUGGGGGCUCGAAGCCGAUCAG | 23 | 0 | 0 | 0 | 0 | 0 | 0 | GGCUCGAAGACGAUCCGAUAC | 21 | 0 | 0 | 0 | 0 | 0 | 0 | GGGGCUCGAAGAAGAUCAGAUA | 22 | 0 | 0 | 0 | 0 | 0 | 0 | AGGGGCUCGAAGACGAUCAG | 20 | 0 | 0 | 0 | 0 | 0 | 0 | GGGGCUCGAAGACGAUUAGAU | 21 | 0 | 0 | 0 | 0 | 0 | 0 | GUUGGGGGCUCGCAGACGAU | 20 | 0 | 0 | 0 | 0 | 0 | 0 | GGGGCUCGAAUACGAUCAGAU | 21 | 0 | 0 | 0 | 0 | 0 | 0 | GUUGGGGGCUCGAAGACGAUCCG | 23 | 0 | 0 | 0 | 0 | 0 | 0 | GUUGGGGGCUCGAAGCCGAUC | 21 | 0 | 0 | 0 | 0 | 0 | 0 | GGGCUCGAAGACGAUCAGCU | 20 | 0 | 0 | 0 | 0 | 0 | 0 | GGCUCGAAGACGAUCCGAUA | 20 | 0 | 0 | 0 | 0 | 0 | 0 | GUUGGGGGCUCGCAGACGAUCAGA | 24 | 0 | 0 | 0 | 0 | 0 | 0 | GUUGGGGGCUCGAAGGCGAUCA | 22 | 0 | 0 | 0 | 0 | 0 | 0 | GGGGCUCGAAGACGAACAGAU | 21 | 0 | 0 | 0 | 0 | 0 | 0 | UGGGGGCUCGAAGACGUUCAG | 21 | 0 | 0 | 0 | 0 | 0 | 0 | GGGGCUCGAAGACGACCAGAU | 21 | 0 | 0 | 0 | 0 | 0 | 0 | UUGGGGGCUCGAAGACUAUCA | 21 | 0 | 0 | 0 | 0 | 0 | 0 | UUGGGGGCUUGAAGACGAUCA | 21 | 0 | 0 | 0 | 0 | 0 | 0 | UGGGGGAUCGAAGACGAUCAG | 21 | 0 | 0 | 0 | 0 | 0 | 0 | UGGGGGCUCGAAGACGAGCAG | 21 | 0 | 0 | 0 | 0 | 0 | 0 | UGGGGGCUCGAAGACGCUCA | 20 | 0 | 0 | 0 | 0 | 0 | 0 | UUGGGUGCUCGAAGACGAUCA | 21 | 0 | 0 | 0 | 0 | 0 | 0 | UGGGGGCUCGAAGACGAUAAG | 21 | 0 | 0 | 0 | 0 | 0 | 0 | UUGGGGGCUCGGAGACGAUCA | 21 | 0 | 0 | 0 | 0 | 0 | 0 | GGGGCUCGAAGACUAUCAGAUAC | 23 | 0 | 0 | 0 | 0 | 0 | 0 | GGGGCUCUAAGACGAUCAGAU | 21 | 0 | 0 | 0 | 0 | 0 | 0 | GGGGCUCGAAGACGAUCCGAU | 21 | 0 | 0 | 0 | 0 | 0 | 0 | UGGGGGCUCGAAGACGAUCAC | 21 | 0 | 0 | 0 | 0 | 0 | 0 | UGGGGGCUCGAAGCCGAUCAGAUA | 24 | 0 | 0 | 0 | 0 | 0 | 0 | GGGCUCGAAGACGAUCAGAA | 20 | 0 | 0 | 0 | 0 | 0 | 0 | GGGACUCGAAGACGAUCAGA | 20 | 0 | 0 | 0 | 0 | 0 | 0 | UGGGGGCUCGAAGACGAUUAG | 21 | 0 | 0 | 0 | 0 | 0 | 0 | UGGGGGCUCGAAUACGAUCAG | 21 | 0 | 0 | 0 | 0 | 0 | 0 | GUUGGGGGCUCGAAGAAGAUCAG | 23 | 0 | 0 | 0 | 0 | 0 | 0 | GUUGGGGGCUCGCAGACGAUCAG | 23 | 0 | 0 | 0 | 0 | 0 | 0 | GUUGGGGGCUCGAAGACGCUC | 21 | 0 | 0 | 0 | 0 | 0 | 0 |
