# Supplementary material for: The tomato genome sequence provides insights into fleshy fruit evolution
Source: Springer Nature journal article supplement (doi:10.1038/nature11119), 2012-05-01
Supplement: 41586_2012_BFnature11119_MOESM69_ESM.zip [file 41586_2012_BFnature11119_MOESM69_ESM.zip › Supplementary_HTM_tables/Supplementary_HTM_Table_209_miR3627_S01.htm]

|  |  |  |  |  |  |  |  |
| --- | --- | --- | --- | --- | --- | --- | --- |
| miRNA\_VARIANT\_SEQUENCE | Sz | L | L | L | L | L | L |
 UCGCAGGAGAGAUGGCACUUGC | 22 | 0 | 0 | 0 | 0 | 0 | 0 | UCGCAGGAGAGAUGGCACUUAG | 22 | 0 | 0 | 0 | 0 | 0 | 0 | UCGCAGGAGAGAUGGCACUUG | 21 | 0 | 0 | 0 | 0 | 0 | 0 | UCGCAGGAGAGAUGGCACUUA | 21 | 0 | 0 | 0 | 0 | 0 | 0 | UGUCGCAGGAGAGAUGGCACUU | 22 | 0 | 0 | 0 | 0 | 0 | 0 | UGUCGCUGGAGAGAUGGCACUU | 22 | 0 | 0 | 0 | 0 | 0 | 0 | UCGCAGGAGAGAUGGAACUUGC | 22 | 0 | 0 | 0 | 0 | 0 | 0 | UCGCAGGAGAGAUGGUACUUGC | 22 | 0 | 0 | 0 | 0 | 0 | 0 | UCGCAGGAGAGAUGGCCCUUGC | 22 | 0 | 0 | 0 | 0 | 0 | 0 | UCGCAGGAGAGAUGGCACUUAU | 22 | 0 | 0 | 0 | 0 | 0 | 0 | UCGCAGGAGAGGUGGCACUUGC | 22 | 0 | 0 | 0 | 0 | 0 | 0 | UCGCAGGAGAGAUGGCACUUC | 21 | 0 | 0 | 0 | 0 | 0 | 0 | UCGCAGGAGAGAGGGCACUUGC | 22 | 0 | 0 | 0 | 0 | 0 | 0 | UUGUCGCAGGAGAGAUGGCACU | 22 | 0 | 0 | 0 | 0 | 0 | 0 | UCGCAGGAGAGAUGGCACUCGC | 22 | 0 | 0 | 0 | 0 | 0 | 0 | UCGCAGGAGAGAUGGCACUUAC | 22 | 0 | 0 | 0 | 0 | 0 | 0 | CGCAGGAGAGAUGGCACUUGC | 21 | 0 | 0 | 0 | 0 | 0 | 0 | UCGCAGGAGAGAUGGCACUUGCA | 23 | 0 | 0 | 0 | 0 | 0 | 0 | UCGCAGGAGAGAUGGCAAUUGC | 22 | 0 | 0 | 0 | 0 | 0 | 0 | UCGCAGGAGAGACGGCACUUAG | 22 | 0 | 0 | 0 | 0 | 0 | 0 | UCGCAGGAGAGAUGGAACUUGA | 22 | 0 | 0 | 0 | 0 | 0 | 0 | UCGCAGGAGAGAUGGCACUUAGA | 23 | 0 | 0 | 0 | 0 | 0 | 0 | UCGCAGGAGAGCUGGCACUUGC | 22 | 0 | 0 | 0 | 0 | 0 | 0 | UCGCAGGAGAGAUGGCACUUGU | 22 | 0 | 0 | 0 | 0 | 0 | 0 | UCGCAGGAGAGAUGGCACUUGA | 22 | 0 | 0 | 0 | 0 | 0 | 0 |
