# Supplementary material for: The tomato genome sequence provides insights into fleshy fruit evolution
Source: Springer Nature journal article supplement (doi:10.1038/nature11119), 2012-05-01
Supplement: 41586_2012_BFnature11119_MOESM69_ESM.zip [file 41586_2012_BFnature11119_MOESM69_ESM.zip › Supplementary_HTM_tables/Supplementary_HTM_Table_227_miR4376_S01.htm]

|  |  |  |  |  |  |  |  |
| --- | --- | --- | --- | --- | --- | --- | --- |
| miRNA\_VARIANT\_SEQUENCE | Sz | L | L | L | L | L | L |
 ACGCAGGAGAGAUGAUGCUGGA | 22 | 0 | 0 | 0 | 0 | 0 | 0 | UACGCAGGAGAGAUGAUGCUG | 21 | 0 | 0 | 0 | 0 | 0 | 0 | UACGCAGGAGAGAUGAUGCUGG | 22 | 0 | 0 | 0 | 0 | 0 | 0 | UACGCAGGAGAGAUGAUGCUGGA | 23 | 0 | 0 | 0 | 0 | 0 | 0 | CGCAGGAGAGAUGAUGCUGGA | 21 | 0 | 0 | 0 | 0 | 0 | 0 | ACGCAGGAGAGAUGAUGCUGGU | 22 | 0 | 0 | 0 | 0 | 0 | 0 | ACGCAGGAGAGAUGAUGAUGGA | 22 | 0 | 0 | 0 | 0 | 0 | 0 | ACGCAGGAGAGAUGAUGCUGG | 21 | 0 | 0 | 0 | 0 | 0 | 0 | ACGCAGGAGAGAUGAUGCUGGAAA | 24 | 0 | 0 | 0 | 0 | 0 | 0 | ACGCAGGAGAGAUGAUGCUGGC | 22 | 0 | 0 | 0 | 0 | 0 | 0 | UACGCAGGAGAGAUGAUGCUGAA | 23 | 0 | 0 | 0 | 0 | 0 | 0 | ACGCAGGAGAGAUGAUGCUGUA | 22 | 0 | 0 | 0 | 0 | 0 | 0 | ACGCAGGAGAGAUGAUGCUGGAC | 23 | 0 | 0 | 0 | 0 | 0 | 0 | CGCAGGAGAGAUGAUGCUGGACG | 23 | 0 | 0 | 0 | 0 | 0 | 0 | UACGCAGGAGAGAUGAUGCUU | 21 | 0 | 0 | 0 | 0 | 0 | 0 | ACGCAGGAGAGAUGAUGCUGGAA | 23 | 0 | 0 | 0 | 0 | 0 | 0 | ACGCAGGAGAGAUGAUGCUUGA | 22 | 0 | 0 | 0 | 0 | 0 | 0 | ACGCAGGAGAGAUGAUGCUGGG | 22 | 0 | 0 | 0 | 0 | 0 | 0 | UACGCAGGAGAGAUGAUGCUGU | 22 | 0 | 0 | 0 | 0 | 0 | 0 | UACGCAGGAGAGAUGAUGCUA | 21 | 0 | 0 | 0 | 0 | 0 | 0 | UACGCAGGAGAGAUGAUGCUGGU | 23 | 0 | 0 | 0 | 0 | 0 | 0 | UACGCAGGAGAGAUGAUGCUUG | 22 | 0 | 0 | 0 | 0 | 0 | 0 | CGCAGGAGAGAUGAUGCUGGAC | 22 | 0 | 0 | 0 | 0 | 0 | 0 | UACGCAGGAGAGAUGAUGCUGGAA | 24 | 0 | 0 | 0 | 0 | 0 | 0 | UACGCAGGAGAGCUGAUGCUGG | 22 | 0 | 0 | 0 | 0 | 0 | 0 | AAACGCAGGAGAGAUGAUGCUGGA | 24 | 0 | 0 | 0 | 0 | 0 | 0 | CACGCAGGAGAGAUGAUGCUGGA | 23 | 0 | 0 | 0 | 0 | 0 | 0 | GCGCAGGAGAGAUGAUGCUGGA | 22 | 0 | 0 | 0 | 0 | 0 | 0 | ACGCAGGACAGAUGAUGCUGGA | 22 | 0 | 0 | 0 | 0 | 0 | 0 | UACGCAGGAGAGAUGAUGGUG | 21 | 0 | 0 | 0 | 0 | 0 | 0 | ACGCAGGAGAGAGGAUGCUGGA | 22 | 0 | 0 | 0 | 0 | 0 | 0 | UACGCAGGAGAGAUGAUGAUGG | 22 | 0 | 0 | 0 | 0 | 0 | 0 | GCAGGAGAGAUGAUGCUGGA | 20 | 0 | 0 | 0 | 0 | 0 | 0 | UACGCAGGAGAGAUGAAUUU | 20 | 0 | 0 | 0 | 0 | 0 | 0 | ACGCAGGAGAGAUGAUGCUUGU | 22 | 0 | 0 | 0 | 0 | 0 | 0 | ACGCAGGAGAGAUGAUGCUGGACA | 24 | 0 | 0 | 0 | 0 | 0 | 0 | UACGCAGGAGAGAUGAUGCUGUU | 23 | 0 | 0 | 0 | 0 | 0 | 0 | UACGCAGGAGAGAUGAUGCCG | 21 | 0 | 0 | 0 | 0 | 0 | 0 | UACGCAGGAGAGAUGAUGCUGA | 22 | 0 | 0 | 0 | 0 | 0 | 0 | UACGCAGGAGAGGUGAUGCUGG | 22 | 0 | 0 | 0 | 0 | 0 | 0 | UACGCAGGAGAGAUGGUGCUGG | 22 | 0 | 0 | 0 | 0 | 0 | 0 | UACGCAGGAGAGUUGAUGCUGG | 22 | 0 | 0 | 0 | 0 | 0 | 0 | UACGCAGGAGAGAUGAUGUUGG | 22 | 0 | 0 | 0 | 0 | 0 | 0 | ACGCAGGAGAGCUGAUGCUGGA | 22 | 0 | 0 | 0 | 0 | 0 | 0 | ACGCAGGAGAGAUGAUGCCGGA | 22 | 0 | 0 | 0 | 0 | 0 | 0 | ACGCAGGAGAGAUGAUGCUGA | 21 | 0 | 0 | 0 | 0 | 0 | 0 | ACGCAGGAGAGAUGAUGCUGAA | 22 | 0 | 0 | 0 | 0 | 0 | 0 | ACGCAGGAGACAUGAUGCUGGA | 22 | 0 | 0 | 0 | 0 | 0 | 0 | UACGCAGGAGAGAUAAUGCUG | 21 | 0 | 0 | 0 | 0 | 0 | 0 | UACGCAGGCGAGAUGAUGCUG | 21 | 0 | 0 | 0 | 0 | 0 | 0 | ACGCAGGAGAGAUGAUGCUGGACG | 24 | 0 | 0 | 0 | 0 | 0 | 0 | ACGCAGGAGCGAUGAUGCUGGA | 22 | 0 | 0 | 0 | 0 | 0 | 0 | UACGCAGGAGAGAGGAUGCUG | 21 | 0 | 0 | 0 | 0 | 0 | 0 | UACGCAGGAGAGAUGAUGCUUU | 22 | 0 | 0 | 0 | 0 | 0 | 0 | UACGCAGGAGAGCUGAUGCUG | 21 | 0 | 0 | 0 | 0 | 0 | 0 | ACGCAGGAGAGAUGAUGCUGGAU | 23 | 0 | 0 | 0 | 0 | 0 | 0 | ACGCAGGAGAGAUGAUGCUGGAAU | 24 | 0 | 0 | 0 | 0 | 0 | 0 | ACGCAGGAGAGAUGAUGCUGGAG | 23 | 0 | 0 | 0 | 0 | 0 | 0 | ACACAGGAGAGAUGAUGCUGGA | 22 | 0 | 0 | 0 | 0 | 0 | 0 | ACGCAGGAGAGAUGACGCUGGA | 22 | 0 | 0 | 0 | 0 | 0 | 0 | ACGCAGGAGAGAUGGUGCUGGA | 22 | 0 | 0 | 0 | 0 | 0 | 0 | UACGCAGGAGAGAUGAUGCU | 20 | 0 | 0 | 0 | 0 | 0 | 0 | UCGCAGGAGAGAUGAUGCUGGA | 22 | 0 | 0 | 0 | 0 | 0 | 0 | ACGCAGGAGAGAUGAUGAUGGG | 22 | 0 | 0 | 0 | 0 | 0 | 0 | ACGCUGGAGAGAUGAUGCUGGA | 22 | 0 | 0 | 0 | 0 | 0 | 0 | UACGCAGGAGAGAUGAUGGUGG | 22 | 0 | 0 | 0 | 0 | 0 | 0 | ACGCGGGAGAGAUGAUGCUGGA | 22 | 0 | 0 | 0 | 0 | 0 | 0 | ACGCAGGAGAGAUGAAGCUGGA | 22 | 0 | 0 | 0 | 0 | 0 | 0 | AAUACGCAGGAGAGAUGAUGCUG | 23 | 0 | 0 | 0 | 0 | 0 | 0 | ACGCAGGAGAGAUGAUGCUCGA | 22 | 0 | 0 | 0 | 0 | 0 | 0 | ACGCAGGAGAGGUGAUGCUGGA | 22 | 0 | 0 | 0 | 0 | 0 | 0 | ACGCCGGAGAGAUGAUGCUGGA | 22 | 0 | 0 | 0 | 0 | 0 | 0 | ACGCAGGAGAGAUGAUGCUGCA | 22 | 0 | 0 | 0 | 0 | 0 | 0 | ACGCAGGAGAGAUGAUGUUGGA | 22 | 0 | 0 | 0 | 0 | 0 | 0 | UACGCAGGAGAGAUGAUACUGG | 22 | 0 | 0 | 0 | 0 | 0 | 0 | ACGCAGGAUAGAUGAUGCUGGA | 22 | 0 | 0 | 0 | 0 | 0 | 0 | UACGCAGGAGAGAUGAUGCUGC | 22 | 0 | 0 | 0 | 0 | 0 | 0 | ACGCAGGAGAGAUCAUGCUGGA | 22 | 0 | 0 | 0 | 0 | 0 | 0 | UACGCAGGAGAGAUGCUGCUG | 21 | 0 | 0 | 0 | 0 | 0 | 0 | UACGCAGGAGAGAUGAGGCUG | 21 | 0 | 0 | 0 | 0 | 0 | 0 | ACGCAGGAGAGAUGAUUCUGGA | 22 | 0 | 0 | 0 | 0 | 0 | 0 | CGCAGGAGAGAUGAUGCUGGAAA | 23 | 0 | 0 | 0 | 0 | 0 | 0 | ACGCAUGAGAGAUGAUGCUGGA | 22 | 0 | 0 | 0 | 0 | 0 | 0 | UACGCAGGAGAGAUGAAGCUG | 21 | 0 | 0 | 0 | 0 | 0 | 0 | AAUACGCAGGAGAGAUGAUGCUGG | 24 | 0 | 0 | 0 | 0 | 0 | 0 | ACGCAGGAGAGAUGAUGGUGGA | 22 | 0 | 0 | 0 | 0 | 0 | 0 | ACGCAGGAGAGAUGAUGCGGGA | 22 | 0 | 0 | 0 | 0 | 0 | 0 | ACGCAGGAGAGAUGAGGCUGGA | 22 | 0 | 0 | 0 | 0 | 0 | 0 | ACGAAGGAGAGAUGAUGCUGGA | 22 | 0 | 0 | 0 | 0 | 0 | 0 | UACGCAGGAGAGAUGAUGCUGUA | 23 | 0 | 0 | 0 | 0 | 0 | 0 | ACGCAGGAGGGAUGAUGCUGGA | 22 | 0 | 0 | 0 | 0 | 0 | 0 | UACGCAGGAGAGAUGAUGCUGGUU | 24 | 0 | 0 | 0 | 0 | 0 | 0 | ACGCAAGAGAGAUGAUGCUGGA | 22 | 0 | 0 | 0 | 0 | 0 | 0 | ACGCAGGAGAGAUGAUCCUGGA | 22 | 0 | 0 | 0 | 0 | 0 | 0 | ACGCAGGAGAGAUGAUGCUGGACU | 24 | 0 | 0 | 0 | 0 | 0 | 0 | UACGCAGGAGAGAUGAUUCUGG | 22 | 0 | 0 | 0 | 0 | 0 | 0 | UCCGCAGGAGAGAUGAUGCUG | 21 | 0 | 0 | 0 | 0 | 0 | 0 | ACGCAGGGGAGAUGAUGCUGGA | 22 | 0 | 0 | 0 | 0 | 0 | 0 | UACGCAGGAGAGAUGGUGCUG | 21 | 0 | 0 | 0 | 0 | 0 | 0 | UACGCAGGAGAGAUGACGCUGG | 22 | 0 | 0 | 0 | 0 | 0 | 0 | ACGCAGGAGAGAUUAUGCUGGA | 22 | 0 | 0 | 0 | 0 | 0 | 0 |
