# Supplementary material for: The tomato genome sequence provides insights into fleshy fruit evolution
Source: Springer Nature journal article supplement (doi:10.1038/nature11119), 2012-05-01
Supplement: 41586_2012_BFnature11119_MOESM69_ESM.zip [file 41586_2012_BFnature11119_MOESM69_ESM.zip › Supplementary_HTM_tables/Supplementary_HTM_Table_239_miR5021_S01.htm]

|  |  |  |  |  |  |  |  |
| --- | --- | --- | --- | --- | --- | --- | --- |
| miRNA\_VARIANT\_SEQUENCE | Sz | L | L | L | L | L | L |
 UCUGAUAGGAAGUAGAAGAAA | 21 | 0 | 0 | 0 | 0 | 0 | 0 | UGAGAAGAAGAAGGAAAAAUAG | 22 | 0 | 0 | 0 | 0 | 0 | 0 | UUGGAAGAAGAAGUAGAAAAA | 21 | 0 | 0 | 0 | 0 | 0 | 0 | AUAGGGAAGAAGAAGAAGACAA | 22 | 0 | 0 | 0 | 0 | 0 | 0 | AAGAAGAAGAAGAAGAACUAU | 21 | 0 | 0 | 0 | 0 | 0 | 0 | UUACAAGAAGAAGUAGAAAAU | 21 | 0 | 0 | 0 | 0 | 0 | 0 | AGAAGAUGAAGAACAAAAUCU | 21 | 0 | 0 | 0 | 0 | 0 | 0 | UUUGAGAAAAAGAUGAAGAAG | 21 | 0 | 0 | 0 | 0 | 0 | 0 | UGCGAAGAUAAAGAAGAAAAAG | 22 | 0 | 0 | 0 | 0 | 0 | 0 | AGUAAGAAGAAGAAGAACCAA | 21 | 0 | 0 | 0 | 0 | 0 | 0 | UUUGAGAAGUAGAAAAAUAAAACA | 24 | 0 | 0 | 0 | 0 | 0 | 0 | AAGGAAAAGAAGAAGAACAAAAG | 23 | 0 | 0 | 0 | 0 | 0 | 0 | AAGAAGAAGAAGAAGAACCAA | 21 | 0 | 0 | 0 | 0 | 0 | 0 | AGGGAAGAAGAAGAAGACAAC | 21 | 0 | 0 | 0 | 0 | 0 | 0 | AGUAGAAGAGGAAGAACAAG | 20 | 0 | 0 | 0 | 0 | 0 | 0 | UAGGGAAGAAGAAGAAGACAACU | 23 | 0 | 0 | 0 | 0 | 0 | 0 | UAGGGAAGAAGAAGAAGACA | 20 | 0 | 0 | 0 | 0 | 0 | 0 | UAGGGAAGAAGAAGAAGACAA | 21 | 0 | 0 | 0 | 0 | 0 | 0 | AGAAGAAGAAGAAGAACUAUA | 21 | 0 | 0 | 0 | 0 | 0 | 0 | UCUGAGAAGAAGAUGAACAU | 20 | 0 | 0 | 0 | 0 | 0 | 0 | AAGAAGAUGAAGAACAAAAUC | 21 | 0 | 0 | 0 | 0 | 0 | 0 |
