# Supplementary material for: The tomato genome sequence provides insights into fleshy fruit evolution
Source: Springer Nature journal article supplement (doi:10.1038/nature11119), 2012-05-01
Supplement: 41586_2012_BFnature11119_MOESM69_ESM.zip [file 41586_2012_BFnature11119_MOESM69_ESM.zip › Supplementary_HTM_tables/Supplementary_HTM_Table_244_miR5054_S01.htm]

|  |  |  |  |  |  |  |  |
| --- | --- | --- | --- | --- | --- | --- | --- |
| miRNA\_VARIANT\_SEQUENCE | Sz | L | L | L | L | L | L |
 GUUCCCCACAGACGGCGCCA | 20 | 0 | 0 | 0 | 0 | 0 | 0 | GGUCCCCACAGACGGCGCCA | 20 | 0 | 0 | 0 | 0 | 0 | 0 | GAUCCCCACAGACGGCGCCA | 20 | 0 | 0 | 0 | 0 | 0 | 0 | UCUCCCCACAGACGGCGCCA | 20 | 0 | 0 | 0 | 0 | 0 | 0 | GAGCCCCACGGUGUGCGCCA | 20 | 0 | 0 | 0 | 0 | 0 | 0 | GUUCCCCACAGACGGCGCCC | 20 | 0 | 0 | 0 | 0 | 0 | 0 | GGGCCCCACGGUGGGCGCCA | 20 | 0 | 0 | 0 | 0 | 0 | 0 | GUUCCCCACAGACGGUGCCA | 20 | 0 | 0 | 0 | 0 | 0 | 0 | GGGCCCCACGGUGGGCGCCC | 20 | 0 | 0 | 0 | 0 | 0 | 0 | GAUCCCCACAGACGGCGCCC | 20 | 0 | 0 | 0 | 0 | 0 | 0 | GUUCCCCACAGACAGCGCCA | 20 | 0 | 0 | 0 | 0 | 0 | 0 | GUGCCCCACGGUGGGCGCCA | 20 | 0 | 0 | 0 | 0 | 0 | 0 | GUUCCCCACAGACGGCUCCA | 20 | 0 | 0 | 0 | 0 | 0 | 0 | GAGCCCCACGGUGGGCGCCA | 20 | 0 | 0 | 0 | 0 | 0 | 0 | AUCCCCACAGACGGCGCCAAA | 21 | 0 | 0 | 0 | 0 | 0 | 0 | GUUCCCCACAGACGGCGCAA | 20 | 0 | 0 | 0 | 0 | 0 | 0 | GGUCCCCACAGACGGCGCCC | 20 | 0 | 0 | 0 | 0 | 0 | 0 | GGUCUCCACAGACGGCGCCA | 20 | 0 | 0 | 0 | 0 | 0 | 0 | GAUCCCCACAGACGGUGCCA | 20 | 0 | 0 | 0 | 0 | 0 | 0 | GGUCCCCACAGACGGUGCCA | 20 | 0 | 0 | 0 | 0 | 0 | 0 | GAUCCCCACAGCCGGCGCCA | 20 | 0 | 0 | 0 | 0 | 0 | 0 | GUUCCCCACAGACGGCGACA | 20 | 0 | 0 | 0 | 0 | 0 | 0 | CGUCCCCACAGACGGCGCCA | 20 | 0 | 0 | 0 | 0 | 0 | 0 | UCUCCCCACUGUGGUCGCCA | 20 | 0 | 0 | 0 | 0 | 0 | 0 |
