# Supplementary material for: The tomato genome sequence provides insights into fleshy fruit evolution
Source: Springer Nature journal article supplement (doi:10.1038/nature11119), 2012-05-01
Supplement: 41586_2012_BFnature11119_MOESM69_ESM.zip [file 41586_2012_BFnature11119_MOESM69_ESM.zip › Supplementary_HTM_tables/Supplementary_HTM_Table_251_miR5072_S01.htm]

|  |  |  |  |  |  |  |  |
| --- | --- | --- | --- | --- | --- | --- | --- |
| miRNA\_VARIANT\_SEQUENCE | Sz | L | L | L | L | L | L |
 CGUUCCCCAGCAGAGUCGCCA | 21 | 0 | 0 | 0 | 0 | 0 | 0 | UUCGUUCCCCAGCGGAGUCGCCA | 23 | 0 | 0 | 0 | 0 | 0 | 0 | AAUUCCCCAGCGGAGUCGCCAU | 22 | 0 | 0 | 0 | 0 | 0 | 0 | GUUCCCCAGUGGAGUCGCCA | 20 | 0 | 0 | 0 | 0 | 0 | 0 | CGUUCCCCAGUGGAGUCGCCA | 21 | 0 | 0 | 0 | 0 | 0 | 0 | GUUCCCCAGUGAAGUCGCCA | 20 | 0 | 0 | 0 | 0 | 0 | 0 | GUUCCCCAGCAGAGUCGCCA | 20 | 0 | 0 | 0 | 0 | 0 | 0 | CGUUCCCCAGCGGAGUCGCCA | 21 | 0 | 0 | 0 | 0 | 0 | 0 | CGGUCCCCAGCGGAGUCGCCA | 21 | 0 | 0 | 0 | 0 | 0 | 0 | GGUCCCCAGCAGAGUCGCCA | 20 | 0 | 0 | 0 | 0 | 0 | 0 | GGUCCCCAGCGGAGUCGCCA | 20 | 0 | 0 | 0 | 0 | 0 | 0 | UCUCCCCAGCGGAGUCGCCA | 20 | 0 | 0 | 0 | 0 | 0 | 0 | GUUCCCCAGCGGAGUCGCCA | 20 | 0 | 0 | 0 | 0 | 0 | 0 | GAUCCCCAGCAGAGUCGCCA | 20 | 0 | 0 | 0 | 0 | 0 | 0 | UCUCCCCAGCAGAGUCGCCA | 20 | 0 | 0 | 0 | 0 | 0 | 0 | CGUUCCCCAGCGGAGUCGCCC | 21 | 0 | 0 | 0 | 0 | 0 | 0 | CGAUCCCCAGCGGAGUCGCCA | 21 | 0 | 0 | 0 | 0 | 0 | 0 | UCGUUCCCCAGCGGAGUCGCCA | 22 | 0 | 0 | 0 | 0 | 0 | 0 | UCCCCAGUGAAGUCGCCAAA | 20 | 0 | 0 | 0 | 0 | 0 | 0 | GAUCCCCAGCGGAGUCGCCA | 20 | 0 | 0 | 0 | 0 | 0 | 0 | UUCAAAUCCCCAGCAGAGUCGCCA | 24 | 0 | 0 | 0 | 0 | 0 | 0 |
