# Supplementary material for: The tomato genome sequence provides insights into fleshy fruit evolution
Source: Springer Nature journal article supplement (doi:10.1038/nature11119), 2012-05-01
Supplement: 41586_2012_BFnature11119_MOESM69_ESM.zip [file 41586_2012_BFnature11119_MOESM69_ESM.zip › Supplementary_HTM_tables/Supplementary_HTM_Table_253_miR5077_S01.htm]

|  |  |  |  |  |  |  |  |
| --- | --- | --- | --- | --- | --- | --- | --- |
| miRNA\_VARIANT\_SEQUENCE | Sz | L | L | L | L | L | L |
 GGUUCACGUCGGGUUCACCA | 20 | 0 | 0 | 0 | 0 | 0 | 0 | UUCUUCACGUCGGGUUCACCA | 21 | 0 | 0 | 0 | 0 | 0 | 0 | UUCACGUCGGGUUCACCAAA | 20 | 0 | 0 | 0 | 0 | 0 | 0 | UCGUUCACGUCGGGUUCACCA | 21 | 0 | 0 | 0 | 0 | 0 | 0 | UUCUUCACGUCGGGUUCACCC | 21 | 0 | 0 | 0 | 0 | 0 | 0 | UCUUCACGUCGGGUUCACCA | 20 | 0 | 0 | 0 | 0 | 0 | 0 | CGUUCACGUCGGGUUCACCA | 20 | 0 | 0 | 0 | 0 | 0 | 0 | GAUUCACGUCGGGUUCACCAAA | 22 | 0 | 0 | 0 | 0 | 0 | 0 | GUUUCGCGUCGGGUUCACCA | 20 | 0 | 0 | 0 | 0 | 0 | 0 | GGUUCACGUCGUGUUCACCA | 20 | 0 | 0 | 0 | 0 | 0 | 0 | UUCUUCACGUCGGGUUCACCAAA | 23 | 0 | 0 | 0 | 0 | 0 | 0 | CGAUUCACGUCGGGUUCACCAAA | 23 | 0 | 0 | 0 | 0 | 0 | 0 | UCUCCACGUCGGGUUCACCA | 20 | 0 | 0 | 0 | 0 | 0 | 0 | UCUCUCACGUCGGGUUCACCA | 21 | 0 | 0 | 0 | 0 | 0 | 0 | AAUUCACGUCGGGUUCACCA | 20 | 0 | 0 | 0 | 0 | 0 | 0 | GGUUCACGUCGGGGUCACCA | 20 | 0 | 0 | 0 | 0 | 0 | 0 | GGUUCACGUCGGGUUAACCA | 20 | 0 | 0 | 0 | 0 | 0 | 0 |
