# Supplementary material for: The tomato genome sequence provides insights into fleshy fruit evolution
Source: Springer Nature journal article supplement (doi:10.1038/nature11119), 2012-05-01
Supplement: 41586_2012_BFnature11119_MOESM69_ESM.zip [file 41586_2012_BFnature11119_MOESM69_ESM.zip › Supplementary_HTM_tables/Supplementary_HTM_Table_257_miR5139_S01.htm]

|  |  |  |  |  |  |  |  |
| --- | --- | --- | --- | --- | --- | --- | --- |
| miRNA\_VARIANT\_SEQUENCE | Sz | L | L | L | L | L | L |
 GUAACCUGGCUCUGAUACCA | 20 | 0 | 0 | 0 | 0 | 0 | 0 | GAAACCUGGCUCUGAUACCA | 20 | 0 | 0 | 0 | 0 | 0 | 0 | CGUAACCUGGCUCUGAUACCA | 21 | 0 | 0 | 0 | 0 | 0 | 0 | AACCUGGCUCUGAUACCAAA | 20 | 0 | 0 | 0 | 0 | 0 | 0 | CGAAACCUGGCUCUGAUACCA | 21 | 0 | 0 | 0 | 0 | 0 | 0 | GGAACCUGGCUCUGAUACCA | 20 | 0 | 0 | 0 | 0 | 0 | 0 | AUCAACCUGGCUCUGAUACCA | 21 | 0 | 0 | 0 | 0 | 0 | 0 | AUGAACCUAGCUCUGAUACCACAA | 24 | 0 | 0 | 0 | 0 | 0 | 0 | UGAACCUAGCUCUGAUACCAU | 21 | 0 | 0 | 0 | 0 | 0 | 0 | CAAACCUUCGCUCUGAUACCAC | 22 | 0 | 0 | 0 | 0 | 0 | 0 | CGAACCUGGCUCUGAUACCA | 20 | 0 | 0 | 0 | 0 | 0 | 0 | AAACCUGGCUCUGAUACCAAA | 21 | 0 | 0 | 0 | 0 | 0 | 0 | AAAACCUGGCUCUGAUACCA | 20 | 0 | 0 | 0 | 0 | 0 | 0 | CGAAAGCUGGCUCGGACACCA | 21 | 0 | 0 | 0 | 0 | 0 | 0 | AUGAACCUUGCUCUGAUACCAUA | 23 | 0 | 0 | 0 | 0 | 0 | 0 | GGAACCUGGCUCUGAUACCAAA | 22 | 0 | 0 | 0 | 0 | 0 | 0 | AGACCCUGCUCUGAUACCAUA | 21 | 0 | 0 | 0 | 0 | 0 | 0 | GUAACCUGGCUCUGCUACCA | 20 | 0 | 0 | 0 | 0 | 0 | 0 | CGAAACCUGGCUCUGAUACCAAA | 23 | 0 | 0 | 0 | 0 | 0 | 0 | UGAGCCUUGCUCUGAUACCAUG | 22 | 0 | 0 | 0 | 0 | 0 | 0 | CGGAACCUGGCUUUGAUACCA | 21 | 0 | 0 | 0 | 0 | 0 | 0 | AUGAACCUUGCUCUGAUACCAUGU | 24 | 0 | 0 | 0 | 0 | 0 | 0 | AUGAACCUUGCUCUGAUACCAU | 22 | 0 | 0 | 0 | 0 | 0 | 0 | AUGAACCUGGCUCUGAUAACAUGA | 24 | 0 | 0 | 0 | 0 | 0 | 0 | UAACCUGGCUCUGAUACCAAA | 21 | 0 | 0 | 0 | 0 | 0 | 0 | CGAAACCUGGCUUUGAUACCA | 21 | 0 | 0 | 0 | 0 | 0 | 0 | CGUAACCUGGCUUUGAUACCA | 21 | 0 | 0 | 0 | 0 | 0 | 0 | GUAACCUGGCUCUGAUACCAAA | 22 | 0 | 0 | 0 | 0 | 0 | 0 | AUACCUUGGCUCUGAUACCAAU | 22 | 0 | 0 | 0 | 0 | 0 | 0 | CGUAACCUGGCUCUGAUACCAAA | 23 | 0 | 0 | 0 | 0 | 0 | 0 | GUAACCUGGCUUUGAUACCA | 20 | 0 | 0 | 0 | 0 | 0 | 0 | CGGAACCUGGCUCUGAUACCA | 21 | 0 | 0 | 0 | 0 | 0 | 0 |
