# Supplementary material for: The tomato genome sequence provides insights into fleshy fruit evolution
Source: Springer Nature journal article supplement (doi:10.1038/nature11119), 2012-05-01
Supplement: 41586_2012_BFnature11119_MOESM69_ESM.zip [file 41586_2012_BFnature11119_MOESM69_ESM.zip › Supplementary_HTM_tables/Supplementary_HTM_Table_265_miR5300_S01.htm]

|  |  |  |  |  |  |  |  |
| --- | --- | --- | --- | --- | --- | --- | --- |
| miRNA\_VARIANT\_SEQUENCE | Sz | L | L | L | L | L | L |
 UCCCCAGUCCAGGCAUUCCAAC | 22 | 0 | 0 | 0 | 0 | 0 | 0 | UCCCCAGUCCAGGCAUUCCAA | 21 | 0 | 0 | 0 | 0 | 0 | 0 | UCUCAGUCCAGGCAUUCCAAC | 21 | 0 | 0 | 0 | 0 | 0 | 0 | UCCCCAGUCCAGGCAUUCCACC | 22 | 0 | 0 | 0 | 0 | 0 | 0 | UCCCCAGUCCAGGCAUUCCAACAG | 24 | 0 | 0 | 0 | 0 | 0 | 0 | UCCCCAGUCCAGGCAUUCCCAC | 22 | 0 | 0 | 0 | 0 | 0 | 0 | UUCCCCAGUCCAGGCAUUCCA | 21 | 0 | 0 | 0 | 0 | 0 | 0 | UCCCCAGUCCAGGCAUUCCA | 20 | 0 | 0 | 0 | 0 | 0 | 0 | CCCAGUCCAGGCAUUCCAAC | 20 | 0 | 0 | 0 | 0 | 0 | 0 | UCCUCAGUCCAGGCAUUCCAAC | 22 | 0 | 0 | 0 | 0 | 0 | 0 | UCUCCAGUCCAGGCAUUCCAAC | 22 | 0 | 0 | 0 | 0 | 0 | 0 | UCCCCAGUUCAGGCAUUCCAAC | 22 | 0 | 0 | 0 | 0 | 0 | 0 | UCCCCAGUCCAGGCAUUCCAACA | 23 | 0 | 0 | 0 | 0 | 0 | 0 | UUCCCAGUCCAGGCAUUCCAAC | 22 | 0 | 0 | 0 | 0 | 0 | 0 | UCCAGUCCAGGCAUUCCAAC | 20 | 0 | 0 | 0 | 0 | 0 | 0 | UCCCCAGUCCAGGCCUUCCAAC | 22 | 0 | 0 | 0 | 0 | 0 | 0 | UCUUCAGUCCAGGCAUUCCAAC | 22 | 0 | 0 | 0 | 0 | 0 | 0 | UCCCCAGUCCAGGCAUUCCAACAA | 24 | 0 | 0 | 0 | 0 | 0 | 0 | UUCCCCAGUCCAGGCAUUCC | 20 | 0 | 0 | 0 | 0 | 0 | 0 | UCCCCAGUCCAGGCAUUCCAAA | 22 | 0 | 0 | 0 | 0 | 0 | 0 | CCCCCAGUCCAGGCAUUCCAAC | 22 | 0 | 0 | 0 | 0 | 0 | 0 | CCCCAGUCCAGGCAUUCCAAC | 21 | 0 | 0 | 0 | 0 | 0 | 0 | UCCCCAGUCCAGGCAUUCCAU | 21 | 0 | 0 | 0 | 0 | 0 | 0 | UCCCCAGUCCAGGCAUUCCAACU | 23 | 0 | 0 | 0 | 0 | 0 | 0 | UCCUUAGUCCAGGCAUUCCAAC | 22 | 0 | 0 | 0 | 0 | 0 | 0 | CUUCCAGUCCAGGCAUUCCAAC | 22 | 0 | 0 | 0 | 0 | 0 | 0 | UUCCCAGUCCAGGCAUUACAAC | 22 | 0 | 0 | 0 | 0 | 0 | 0 | GAUCCAGUCCAGGCAUUCCAAC | 22 | 0 | 0 | 0 | 0 | 0 | 0 | UCCCCAGUCCAGGCAUUCCAUC | 22 | 0 | 0 | 0 | 0 | 0 | 0 | UCCCCAGUCCAGGCAUUCCAACCG | 24 | 0 | 0 | 0 | 0 | 0 | 0 | ACCCCAGUCCAGGCAUUCCAAC | 22 | 0 | 0 | 0 | 0 | 0 | 0 | UCCCCAGUCCAGCCAUUCCAAC | 22 | 0 | 0 | 0 | 0 | 0 | 0 | UCCCCAGUACAGGCAUUCCAAC | 22 | 0 | 0 | 0 | 0 | 0 | 0 | CAGUCCAGGCAUUCCAACAGU | 21 | 0 | 0 | 0 | 0 | 0 | 0 | CCCCCCAGUCCAGGCAUUCCAAC | 23 | 0 | 0 | 0 | 0 | 0 | 0 | UCCCCAGUCCAGGCAUUCCCA | 21 | 0 | 0 | 0 | 0 | 0 | 0 | UCCCCAGUCCAGGCUUUCCAAC | 22 | 0 | 0 | 0 | 0 | 0 | 0 | UCUCAGUCCAGGCAUUCCAA | 20 | 0 | 0 | 0 | 0 | 0 | 0 | UCCCCAGUCCAGGCAUUCCU | 20 | 0 | 0 | 0 | 0 | 0 | 0 | UCCCCAGGCCAGGCAUUCCAAC | 22 | 0 | 0 | 0 | 0 | 0 | 0 | UCCCCAGUCCAGGCAUUCCAACAU | 24 | 0 | 0 | 0 | 0 | 0 | 0 | UUCCCAGUCCAGGCAUUCCAACAG | 24 | 0 | 0 | 0 | 0 | 0 | 0 | UUCUCAGUCCAGGCAUUCCAAC | 22 | 0 | 0 | 0 | 0 | 0 | 0 | UCCCCAUUCCAGGCAUUCCAAC | 22 | 0 | 0 | 0 | 0 | 0 | 0 | UCCCCAGUCCUGGCAUUCCAAC | 22 | 0 | 0 | 0 | 0 | 0 | 0 | UCCCCAGUCCGGGCAUUCCAAC | 22 | 0 | 0 | 0 | 0 | 0 | 0 | UCCCCAGUCCAGGCAUUCUAAC | 22 | 0 | 0 | 0 | 0 | 0 | 0 | UUCCCCAGUCCAGGCAUUCCU | 21 | 0 | 0 | 0 | 0 | 0 | 0 | UCCCCAGUCCAGGCAUUCAAC | 21 | 0 | 0 | 0 | 0 | 0 | 0 | UCCCCAAUCCAGGCAUUCCAAC | 22 | 0 | 0 | 0 | 0 | 0 | 0 | UCCCCAGUCCAGGCAUUCCAC | 21 | 0 | 0 | 0 | 0 | 0 | 0 | UUCCCAGUUCAGGCAUUCCAAC | 22 | 0 | 0 | 0 | 0 | 0 | 0 | UUCCCAGUCCAGGCAUUCCAACAA | 24 | 0 | 0 | 0 | 0 | 0 | 0 | UCCCCAGUCCAGGCAUUCCAACG | 23 | 0 | 0 | 0 | 0 | 0 | 0 | UCUCAGUCCAGGCAUUCCAACAG | 23 | 0 | 0 | 0 | 0 | 0 | 0 | UCCCCAGUCCAGGCAUUCCAGC | 22 | 0 | 0 | 0 | 0 | 0 | 0 | UCCCCAGUCUAGGCAUUCCAAC | 22 | 0 | 0 | 0 | 0 | 0 | 0 | UCCCCAGUCCAGGCAUUCCCC | 21 | 0 | 0 | 0 | 0 | 0 | 0 | UCCCCAGUCCAGGCAUCCCAAC | 22 | 0 | 0 | 0 | 0 | 0 | 0 | UCCCCAGUCCAGGAAUUCCAAC | 22 | 0 | 0 | 0 | 0 | 0 | 0 | UCCCCAGUCCCGUCAUUCCAAC | 22 | 0 | 0 | 0 | 0 | 0 | 0 | CCCAGUCCAGGCAUUCCCAC | 20 | 0 | 0 | 0 | 0 | 0 | 0 | UCCCCAGUCCCGGCAUUCCCAC | 22 | 0 | 0 | 0 | 0 | 0 | 0 | UCCCCAGUCCAGGCACUCCAAC | 22 | 0 | 0 | 0 | 0 | 0 | 0 | UCCCCAGCCCAGGCAUUCCAAC | 22 | 0 | 0 | 0 | 0 | 0 | 0 | UCCCAGUCCAGGCAUUCCAAC | 21 | 0 | 0 | 0 | 0 | 0 | 0 | UCCCCAGUCCAUGCAUUCCAAC | 22 | 0 | 0 | 0 | 0 | 0 | 0 | UCCCCAGUCCAGGCAUUCAAAC | 22 | 0 | 0 | 0 | 0 | 0 | 0 | UGCCCAGUCCAGGCAUUCCAAC | 22 | 0 | 0 | 0 | 0 | 0 | 0 | UCCCUAGUCCAGGCAUUCCAAC | 22 | 0 | 0 | 0 | 0 | 0 | 0 | UCCCCAGUCCCGGCAUUCCAAC | 22 | 0 | 0 | 0 | 0 | 0 | 0 | UACCCAGUCCAGGCAUUCCAAC | 22 | 0 | 0 | 0 | 0 | 0 | 0 | UCCCCAGUCCAGUCAUUCCAAC | 22 | 0 | 0 | 0 | 0 | 0 | 0 | UCCCAAGUCCAGGCAUUCCAAC | 22 | 0 | 0 | 0 | 0 | 0 | 0 | UCCCCAGUCCAGGCGUUCCAAC | 22 | 0 | 0 | 0 | 0 | 0 | 0 | UCCCCCGUCCAGGCAUUCCAAC | 22 | 0 | 0 | 0 | 0 | 0 | 0 | UCCCCAGUCCAGGCCUUCCAA | 21 | 0 | 0 | 0 | 0 | 0 | 0 | UCCCCAGUCCAGGCAUUCCAAU | 22 | 0 | 0 | 0 | 0 | 0 | 0 | UUCCCCAGUCCAGGCAUUCCAAC | 23 | 0 | 0 | 0 | 0 | 0 | 0 | UCCCCAGUCCAGGCAUUACAAC | 22 | 0 | 0 | 0 | 0 | 0 | 0 | UUUCCAGUCCAGGCAUUCCAAC | 22 | 0 | 0 | 0 | 0 | 0 | 0 | UCCCCAGUCCAGGCAUUCCUAC | 22 | 0 | 0 | 0 | 0 | 0 | 0 | CUCCCCAGUCCAGGCAUUCCAAC | 23 | 0 | 0 | 0 | 0 | 0 | 0 | AAUCCCCAGUCCAGGCAUUCCAAC | 24 | 0 | 0 | 0 | 0 | 0 | 0 | UUCCCAGUCCAGGCAUUCCAA | 21 | 0 | 0 | 0 | 0 | 0 | 0 | UCCCCAGUCCAGGCAUUCCGAC | 22 | 0 | 0 | 0 | 0 | 0 | 0 | UCCCCAGUCCAGGUAUUCCAAC | 22 | 0 | 0 | 0 | 0 | 0 | 0 | UCCCCAGUCCAGACAUUCCAAC | 22 | 0 | 0 | 0 | 0 | 0 | 0 | UCCCCAGUCCAGGCAUUUCAAC | 22 | 0 | 0 | 0 | 0 | 0 | 0 | UCCCCAGUCAAGGCAUUCCAAC | 22 | 0 | 0 | 0 | 0 | 0 | 0 |
