# Supplementary material for: The tomato genome sequence provides insights into fleshy fruit evolution
Source: Springer Nature journal article supplement (doi:10.1038/nature11119), 2012-05-01
Supplement: 41586_2012_BFnature11119_MOESM69_ESM.zip [file 41586_2012_BFnature11119_MOESM69_ESM.zip › Supplementary_HTM_tables/Supplementary_HTM_Table_268_miR5303_S01.htm]

|  |  |  |  |  |  |  |  |
| --- | --- | --- | --- | --- | --- | --- | --- |
| miRNA\_VARIANT\_SEQUENCE | Sz | L | L | L | L | L | L |
 UUUUUGAAGAGUUCGAGCAAC | 21 | 0 | 0 | 0 | 0 | 0 | 0 | UUUUUGAAGAGUCCGAACAAC | 21 | 0 | 0 | 0 | 0 | 0 | 0 | UUUUUGAAGAGUUUGGGCAAC | 21 | 0 | 0 | 0 | 0 | 0 | 0 | UUUUUGAAGGAUCCGAGCAAC | 21 | 0 | 0 | 0 | 0 | 0 | 0 | UUUUUGAAGAGUCCGAACAACA | 22 | 0 | 0 | 0 | 0 | 0 | 0 | AUUUUUGAAGAGUCUGAGCAACAU | 24 | 0 | 0 | 0 | 0 | 0 | 0 | UUUUUGAAGAGUAUGAGCAA | 20 | 0 | 0 | 0 | 0 | 0 | 0 | UUUUCUGAAGAGUCCGAGCAACAU | 24 | 0 | 0 | 0 | 0 | 0 | 0 | UUUUAAAGAGUUCGAGCAACGGAG | 24 | 0 | 0 | 0 | 0 | 0 | 0 | UUUUGAGGAGUACGAGCAACAUA | 23 | 0 | 0 | 0 | 0 | 0 | 0 | UUUGAAGAGUUCGAGCAACAUAGC | 24 | 0 | 0 | 0 | 0 | 0 | 0 | ACAUUUUGAAGAGUCCGAGCAACA | 24 | 0 | 0 | 0 | 0 | 0 | 0 | UUUUGAAGAGUUUGAGCAACAUAG | 24 | 0 | 0 | 0 | 0 | 0 | 0 | UUUGAAGAGUUCGAGAAGCAU | 21 | 0 | 0 | 0 | 0 | 0 | 0 | CUUUUUUGGAGAGUCUGAGCAACA | 24 | 0 | 0 | 0 | 0 | 0 | 0 | UUUUGAAGAAUUCGAGCAACAUAG | 24 | 0 | 0 | 0 | 0 | 0 | 0 | UUUCUUGAAGAGUCCGAACA | 20 | 0 | 0 | 0 | 0 | 0 | 0 | UUUUUGAAGAGUCCGAGCAA | 20 | 0 | 0 | 0 | 0 | 0 | 0 | UUUUGAAGAGUCCGAGCAACAUAU | 24 | 0 | 0 | 0 | 0 | 0 | 0 | AUUUUUGAAGAGUCCGAGCAGCAU | 24 | 0 | 0 | 0 | 0 | 0 | 0 | CAUUUUUGAAGAGUCCGAGCA | 21 | 0 | 0 | 0 | 0 | 0 | 0 | CAUUUUUGGAGUGUCCGAGCA | 21 | 0 | 0 | 0 | 0 | 0 | 0 | AUUUUUGAAGAGUCCGAGCAAUAU | 24 | 0 | 0 | 0 | 0 | 0 | 0 | UUUCUGAAGAGUUCGAGCAAAAGA | 24 | 0 | 0 | 0 | 0 | 0 | 0 | AUUAUUGAAGAGUUUGAGCAACAU | 24 | 0 | 0 | 0 | 0 | 0 | 0 | UUUUUAAAAAGAGUUCGAGCA | 21 | 0 | 0 | 0 | 0 | 0 | 0 | UUUCUGAAGAGUCCGAGCAAC | 21 | 0 | 0 | 0 | 0 | 0 | 0 | UUUUUUGAAGAGAUCGAACAACAU | 24 | 0 | 0 | 0 | 0 | 0 | 0 | UUUGAAGAGUUCGAGCAACACAG | 23 | 0 | 0 | 0 | 0 | 0 | 0 | UAUUUUUGGAGAGUCCGAGCA | 21 | 0 | 0 | 0 | 0 | 0 | 0 | UUUUGAAGAGUUUGAGCAACAUAA | 24 | 0 | 0 | 0 | 0 | 0 | 0 | AAUUUUGAAGAGUCCGAGCAACAU | 24 | 0 | 0 | 0 | 0 | 0 | 0 | UUUUUGAAGAGUCCGAGCAAC | 21 | 0 | 0 | 0 | 0 | 0 | 0 | UUGUUGAAGAGUCGGAGCAAC | 21 | 0 | 0 | 0 | 0 | 0 | 0 | UUUUGAAGAGUCCGAGCAACAUAG | 24 | 0 | 0 | 0 | 0 | 0 | 0 | UUGUUGAAGAGUCCGAGCAU | 20 | 0 | 0 | 0 | 0 | 0 | 0 | AUUUUUGAAGAGUCCGAGCAACAU | 24 | 0 | 0 | 0 | 0 | 0 | 0 | UUUUUGAAGAGUCCGAGCAACAUA | 24 | 0 | 0 | 0 | 0 | 0 | 0 | CAUUUUUGGAGAGUCCUAGCA | 21 | 0 | 0 | 0 | 0 | 0 | 0 | AUUUUUGAAGAGUUUGGGCAA | 21 | 0 | 0 | 0 | 0 | 0 | 0 | AUUUUUGAAGAGUUCGUACAAUAU | 24 | 0 | 0 | 0 | 0 | 0 | 0 | AUUUUUGAAGAGUUCGAGCAACAU | 24 | 0 | 0 | 0 | 0 | 0 | 0 | AUUUUUGAAGAAUUCGAACAAGCA | 24 | 0 | 0 | 0 | 0 | 0 | 0 | UUUUUUGAAGAGUCCGAGCAACAU | 24 | 0 | 0 | 0 | 0 | 0 | 0 | UUUUGAAGAGUUCGAGCAACAUAG | 24 | 0 | 0 | 0 | 0 | 0 | 0 | UUUGAAAGAGUUCGAGCAACAUC | 23 | 0 | 0 | 0 | 0 | 0 | 0 | AUAUUUGAAGAGUUUGAUCAACGU | 24 | 0 | 0 | 0 | 0 | 0 | 0 | AUUUUUGAAGAGUCCGAGCAA | 21 | 0 | 0 | 0 | 0 | 0 | 0 | UUUUGAAGAGUUAGAGCAACAUAG | 24 | 0 | 0 | 0 | 0 | 0 | 0 | UUUGAAGAGUUCGAGCAACAUAG | 23 | 0 | 0 | 0 | 0 | 0 | 0 | CAUUUUUGGAGAGUCGGAGCAACA | 24 | 0 | 0 | 0 | 0 | 0 | 0 | AAUUUUGAAGAGUCGGAGCAA | 21 | 0 | 0 | 0 | 0 | 0 | 0 | AUUUUGAAGAGUCCGAGCAACAUA | 24 | 0 | 0 | 0 | 0 | 0 | 0 | AUUUUUUGAAGAGUCCGAGCAACA | 24 | 0 | 0 | 0 | 0 | 0 | 0 | AUUUUUUGGAAAGUUCGAGCAAUU | 24 | 0 | 0 | 0 | 0 | 0 | 0 | UUUUUUGAAGAGUCCGGACAACAU | 24 | 0 | 0 | 0 | 0 | 0 | 0 | UUAGGAGAGUACGAGCAACA | 20 | 0 | 0 | 0 | 0 | 0 | 0 | UUUUGAAGAGUCCGAGCAACUUAG | 24 | 0 | 0 | 0 | 0 | 0 | 0 |
